# Supplementary material
Source: publisher figshare collection journal article supplement (https://rs.figshare.com/ndownloader/files/23758771)
Supplement: Supplementary file 1 [file 23758771]

## Sheet: Participant 01
MTP_moment	Plantar_Aponuerosis_Length	MTP_angle	Time	AbductorHallucis	FlexorDigitorumBrevis
NaN	NaN	-33.5624	0	-57.2348	-86.0582
NaN	NaN	-33.9226	0.00645	-55.554	-88.641
NaN	NaN	-34.4401	0.0129	-46.0896	-80.8056
NaN	NaN	-35.066	0.01935	-30.4132	-62.67
NaN	NaN	-35.7212	0.0258	-12.0653	-38.5565
NaN	NaN	-36.2866	0.03225	5.34338	-14.0994
NaN	NaN	-36.6419	0.0387	19.5402	7.10858
NaN	NaN	-36.6566	0.04515	29.7464	24.0773
NaN	NaN	-36.1752	0.0516	35.8796	36.8665
NaN	NaN	-35.2782	0.05805	37.4858	45.1712
NaN	NaN	-34.0718	0.0645	33.5445	48.1293
NaN	NaN	-32.7124	0.07095	23.6553	45.071
NaN	NaN	-31.3746	0.0774	9.36618	36.4771
NaN	NaN	-30.1467	0.08385	-5.95394	24.3186
NaN	NaN	-29.0677	0.0903	-18.8222	11.5078
NaN	NaN	-28.1551	0.09675	-27.3947	1.09352
NaN	NaN	-27.3747	0.1032	-31.8232	-4.56296
NaN	NaN	-26.7101	0.10965	-33.4695	-4.7918
NaN	NaN	-26.1547	0.1161	-34.0235	-1.17147
NaN	NaN	-25.6803	0.12255	-34.8715	3.09154
NaN	NaN	-25.2675	0.129	-36.4607	4.84949
NaN	NaN	-24.9046	0.13545	-37.8933	3.0324
NaN	NaN	-24.58	0.1419	-37.6948	-0.85302
NaN	NaN	-24.276	0.14835	-35.4972	-4.90007
NaN	NaN	-23.9794	0.1548	-32.5167	-8.6884
NaN	NaN	-23.673	0.16125	-30.124	-12.3674
NaN	NaN	-23.3467	0.1677	-28.5034	-15.5804
NaN	NaN	-23.001	0.17415	-26.9086	-18.2204
NaN	NaN	-22.6507	0.1806	-24.8126	-20.9603
NaN	NaN	-22.3224	0.18705	-22.5881	-24.1514
NaN	NaN	-22.03	0.1935	-21.0466	-26.8979
NaN	NaN	-21.7738	0.19995	-20.322	-27.8884
NaN	NaN	-21.5498	0.2064	-19.4509	-26.4924
NaN	NaN	-21.3434	0.21285	-17.0791	-22.6306
NaN	NaN	-21.1486	0.2193	-12.3145	-16.3953
NaN	NaN	-20.9624	0.22575	-4.9538	-8.22292
NaN	NaN	-20.7859	0.2322	4.62108	1.03656
NaN	NaN	-20.6233	0.23865	15.4236	10.3676
NaN	NaN	-20.4788	0.2451	26.0102	18.74
NaN	NaN	-20.3568	0.25155	34.7928	25.0125
NaN	NaN	-20.2519	0.258	40.2651	27.9907
NaN	NaN	-20.1584	0.26445	41.5372	27.4772
NaN	NaN	-20.065	0.2709	38.8399	25.2949
NaN	NaN	-19.9587	0.27735	33.2917	23.8937
NaN	NaN	-19.8317	0.2838	26.4688	23.9745
NaN	NaN	-19.6772	0.29025	19.9476	24.4349
NaN	NaN	-19.4929	0.2967	14.3832	23.8404
NaN	NaN	-19.2986	0.30315	9.20642	21.1693
NaN	NaN	-19.1208	0.3096	3.88202	15.7842
NaN	0.173936	-18.9962	0.31605	-0.932803	7.51335
NaN	0.173836	-18.9357	0.3225	-3.92799	-2.71274
NaN	0.173725	-18.9237	0.32895	-4.33657	-12.6471
NaN	0.173631	-18.9319	0.3354	-2.27423	-19.9688
NaN	0.173578	-18.9346	0.34185	1.59668	-23.5627
NaN	0.173574	-18.9287	0.3483	6.3115	-23.3718
NaN	0.173617	-18.9217	0.35475	10.8081	-19.9013
NaN	0.173699	-18.9278	0.3612	14.3389	-14.4286
NaN	0.173797	-18.9632	0.36765	16.7501	-9.09013
NaN	0.1739	-19.0474	0.3741	18.2801	-6.02035
NaN	0.174013	-19.2079	0.38055	19.1233	-6.26797
NaN	0.174137	-19.4692	0.387	19.2876	-9.27348
NaN	0.174272	-19.8286	0.39345	18.9765	-12.6058
NaN	0.174415	-20.2798	0.3999	18.8686	-12.6508
NaN	0.174561	-20.8133	0.40635	19.4915	-7.04993
NaN	0.174706	-21.3923	0.4128	20.5518	3.51275
NaN	0.174844	-22.0015	0.41925	21.4433	16.2309
NaN	0.174979	-22.6328	0.4257	21.997	28.1063
NaN	0.175113	-23.2784	0.43215	22.353	37.1476
NaN	0.175251	-23.9386	0.4386	22.6103	42.8064
NaN	0.1754	-24.623	0.44505	22.8706	45.7109
0.0165427	0.175571	-25.3468	0.4515	23.2672	46.7828
-0.562174	0.175761	-26.1098	0.45795	23.7585	46.4935
-1.05763	0.17597	-26.9218	0.4644	24.0412	45.0106
-1.55571	0.176189	-27.813	0.47085	23.858	42.7872
-2.08521	0.176389	-28.8122	0.4773	23.3802	40.6919
-2.62128	0.176554	-29.9384	0.48375	22.9919	39.4795
-3.1962	0.176674	-31.2179	0.4902	22.7168	39.0264
-3.75021	0.176737	-32.6911	0.49665	22.1818	38.0921
-4.27648	0.176743	-34.3339	0.5031	20.9019	34.7493
-4.8573	0.176691	-36.1339	0.50955	18.1902	27.0785
-5.46867	0.176578	-38.0903	0.516	12.9551	14.1712
-6.0635	0.176411	-40.1918	0.52245	4.13163	-2.66753
-6.66782	0.176198	-42.4616	0.5289	-8.39267	-19.8217
-7.28964	0.175937	-44.9745	0.53535	-23.3876	-33.5338
-7.94899	0.175626	-47.8558	0.5418	-38.5875	-42.163
-8.58365	0.17528	-51.1343	0.54825	-51.3024	-45.8694
-9.05509	0.174914	-54.8146	0.5547	-59.4841	-45.51
-9.2915	0.174545	-58.8051	0.56115	-62.7855	-42.9059
-9.35556	0.174183	-62.7503	0.5676	-62.5356	-40.9432
-9.42536	0.173823	-66.2268	0.57405	-60.4741	-41.8842
-9.37536	0.173443	-68.6857	0.5805	-57.5266	-45.2667
-8.99732	0.172984	-69.511	0.58695	-53.8623	-47.7338
-8.23092	0.172386	-68.4897	0.5934	-49.7378	-45.1775
-7.04126	0.171598	-65.4619	0.59985	-45.9162	-35.4047
-5.61581	0.170626	-60.2765	0.6063	-43.267	-19.3313
-4.26491	0.169658	-53.7476	0.61275	-42.0385	-0.407032
-3.07905	0.168915	-46.6088	0.6192	-41.7186	16.9033
-2.0312	0.168617	-39.7519	0.62565	-41.6367	29.0373
-1.20083	0.168796	-35.4526	0.6321	-41.4794	34.8908
-0.566634	0.169255	-32.5542	0.63855	-41.2927	35.5542
-0.119828	0.169791	-31.0561	0.645	-41.2191	32.4891
				-41.1389	27.0216
				-40.4625	21.4542
				-38.3	18.6885
				-33.6451	20.3758
				-25.6571	26.2333
				-14.5473	34.76
				-2.26826	44.1437
				8.01291	52.8274
				13.2697	59.8001
				12.1543	64.7066
				6.20221	67.609
				-0.32907	68.5526
				-2.50098	67.5733
				2.31943	65.2192
				12.6973	62.674
				24.4789	61.1492
				34.2216	61.4847
				41.4131	64.1787
				47.8089	68.8347
				55.0959	73.4955
				63.2448	75.615
				70.8101	73.7244
				76.0872	67.4622
				77.754	56.8847
				75.0487	43.0213
				67.7385	29.0573
				56.1113	20.634
				41.1004	24.4093
				24.3478	44.2244
				8.37309	75.5967
				-3.68361	103.465
				-9.47598	108.259
				-8.79488	76.4627
				-3.47349	6.99591
				3.66849	-89.0978
				9.83337	-192.369
				12.784	-279.102
				11.3892	-327.406
				6.30074	-326.867
				-0.227972	-284.471
				-5.30442	-219.525
				-6.40101	-153.024
				-2.53181	-100.208
				5.16368	-68.0804
				14.4807	-56.4825
				23.5846	-60.9032
				31.1139	-75.0131
				35.5939	-91.9151
				35.5354	-104.995
				30.4072	-110.233
				21.5877	-108.645
				12.0109	-104.768
				4.64024	-102.1
				1.19986	-100.858
				1.82996	-99.2653
				5.22084	-95.5262
				8.61453	-88.8371
				8.21013	-79.6801
				0.790953	-69.7851
				-14.263	-61.4047
				-34.0508	-55.5847
				-53.2086	-51.0681
				-66.7437	-45.7105
				-72.4144	-38.4654
				-70.6652	-29.3312
				-63.3643	-18.513
				-53.1219	-6.55302
				-42.7095	5.3287
				-34.1467	15.807
				-28.0119	24.3703
				-23.4418	31.4235
				-18.9313	37.8096
				-13.4928	44.5866
				-7.46129	52.8327
				-2.23104	63.0664
				1.11062	74.9324
				2.91462	87.6982
				4.33344	100.814
				5.33232	114.079
				3.89195	128.455
				-2.2605	147.337
				-13.4979	174.796
				-28.0474	209.009
				-42.8115	236.295
				-54.0179	234.675
				-58.6279	189.886
				-56.1086	111.582
				-48.3388	30.0172
				-37.8411	-26.3343
				-26.4194	-48.2375
				-14.9968	-42.8976
				-4.10491	-21.1434
				5.85032	8.85738
				14.7128	40.3474
				22.5235	67.4568
				29.1488	86.8365
				33.7996	97.8901
				35.0043	101.426
				31.8902	98.9099
				25.9878	92.9474
				21.4841	87.8717
				23.1038	88.339
				32.86	95.2421
				48.3981	102.509
				64.3236	99.0013
				75.0771	75.4372
				77.3627	32.7545
				70.7627	-15.4514
				56.5769	-52.6567
				36.729	-71.7085
				13.786	-75.1484
				-8.66004	-68.8501
				-26.1326	-58.3804
				-34.4628	-46.4123
				-31.7227	-32.3878
				-19.3762	-15.2156
				-1.61137	4.60392
				16.45	23.9296
				30.3125	37.9436
				36.9591	43.0224
				35.2509	38.5757
				25.6285	27.2649
				9.13538	13.082
				-12.813	-1.76781
				-37.3825	-17.2487
				-60.0227	-33.5932
				-76.3235	-50.2219
				-84.1918	-65.6785
				-84.2529	-78.3328
				-78.8219	-87.4213
				-70.4691	-93.3229
				-60.745	-97.1353
				-49.7824	-99.6464
				-36.9236	-100.123
				-21.66	-96.5839
				-4.32349	-87.5664
				13.9215	-73.4268
				31.7017	-56.1527
				47.7936	-38.222
				61.1414	-21.4641
				71.0035	-6.66499
				76.6718	5.60527
				76.7478	13.7215
				69.9824	15.534
				57.4968	10.5974
				42.9401	1.03173
				30.3963	-9.55825
				23.0735	-17.0087
				23.2474	-17.0519
				32.1342	-6.53635
				49.3337	14.5075
				71.6222	41.3533
				92.129	65.3021
				102.449	77.187
				96.7614	71.7287
				74.5098	50.0286
				40.6096	19.0935
				3.17283	-11.6473
				-30.3108	-35.0593
				-55.6152	-48.9157
				-71.6651	-54.963
				-78.7886	-55.858
				-77.5739	-52.6767
				-68.9046	-44.641
				-54.3759	-30.5881
				-36.6896	-10.8448
				-19.4946	11.8859
				-6.49429	33.214
				-0.627203	48.4712
				-3.51175	53.9684
				-14.7369	47.9786
				-31.651	31.414
				-50.0144	8.30533
				-64.9723	-14.5831
				-72.8688	-30.5548
				-73.3671	-37.0432
				-69.3393	-36.8802
				-64.7288	-35.609
				-63.0188	-37.842
				-66.4856	-45.1282
				-75.2754	-56.0098
				-87.3781	-68.2143
				-99.786	-80.8848
				-109.129	-94.0756
				-111.693	-106.08
				-104.175	-112.089
				-85.1105	-106.47
				-55.854	-87.0922
				-20.4256	-57.6848
				15.6667	-26.0095
				47.2006	0.519303
				70.7964	18.4633
				85.4263	29.0684
				91.7432	36.0805
				91.2606	42.4948
				86.1674	48.3724
				79.0632	51.2609
				72.1796	49.0644
				66.606	42.657
				62.0923	35.6238
				57.8999	31.4015
				53.8769	30.5845
				50.28	31.1829
				47.008	31.1579
				43.6284	30.0403
				39.702	28.6183
				34.9985	27.7652
				30.0358	27.3508
				26.2543	26.3353
				25.2166	24.2318
				27.4653	22.0553
				31.7226	21.3929
				35.2231	22.7922
				35.4775	25.1311
				31.9636	26.3123
				26.1488	24.6821
				20.2615	20.2286
				16.032	14.9024
				13.8135	11.7263
				12.5373	12.8554
				10.9723	17.9622
				9.02945	24.5441
				7.42617	30.0307
				6.50368	33.6669
				5.91324	36.4078
				5.16094	39.4204
				4.23787	42.8119
				3.8066	45.2581
				4.65138	44.7788
				6.93777	40.3463
				10.1413	33.0156
				13.3951	25.581
				15.5529	20.9579
				15.229	20.4056
				11.3961	22.9016
				4.25042	26.0687
				-4.71704	27.7
				-13.8464	26.59
				-22.4177	22.5298
				-30.4163	16.2267
				-37.3588	9.21054
				-41.9108	3.21542
				-43.0717	-0.595296
				-41.3559	-1.78802
				-38.4243	-0.449279
				-35.8941	2.77208
				-34.4408	6.56293
				-33.4683	9.15861
				-31.8015	8.85593
				-28.8907	4.68341
				-25.0957	-3.08597
				-21.2807	-12.9042
				-18.5849	-22.4097
				-17.9577	-29.3173
				-19.3181	-32.4326
				-21.4973	-31.9731
				-23.3265	-29.1185
				-24.4312	-25.5595
				-24.9468	-22.9544
				-24.9526	-22.0152
				-24.2355	-22.0627
				-22.4436	-21.8145
				-19.5957	-20.7086
				-16.2512	-19.3101
				-12.9284	-18.5775
				-9.82307	-19.0227
				-7.27131	-20.3936
				-5.93821	-22.0562
				-6.20437	-23.8091
				-7.53969	-26.1207
				-8.6646	-29.392
				-8.19116	-32.9475
				-5.20394	-34.8387
				0.322948	-33.1234
				7.53625	-27.452
				15.3103	-19.3331
				22.7402	-11.2094
				28.9633	-5.01088
				33.0631	-1.10031
				34.5836	1.16885
				33.9662	2.01979
				32.1687	0.686602
				29.5941	-3.87583
				25.6819	-11.583
				19.8885	-20.4823
				12.6237	-27.7024
				5.03789	-31.248
				-1.69315	-31.0467
				-6.79121	-28.4386
				-9.94944	-24.8246
				-11.3234	-20.9969
				-11.4439	-17.4764
				-10.9363	-14.9238
				-10.264	-13.9749
				-9.60078	-14.7411
				-8.75502	-16.5453
				-7.35605	-18.1007
				-5.22575	-18.0792
				-2.53148	-15.9373
				0.32312	-12.4358
				3.17505	-9.16718
				6.59911	-7.38611
				11.3176	-7.29983
				16.9877	-8.23998
				22.1372	-9.09682
				25.2835	-8.56273
				25.8217	-5.15791
				23.9594	2.78562
				20.0681	16.7016
				14.4298	36.4668
				7.70302	58.5356
				1.20083	75.2661
				-3.38368	77.0646
				-4.37665	56.5468
				-0.678437	12.2865
				7.51456	-49.4259
				18.1523	-115.222
				27.3577	-167.491
				30.6674	-188.776
				25.3836	-167.216
				12.3091	-102.065
				-4.80315	-7.05643
				-21.4196	90.998
				-33.8973	160.375
				-39.8171	177.261
				-37.885	135.74
				-28.2683	49.6847
				-13.3325	-52.1511
				2.12004	-134.819
				12.4709	-168.966
				14.3999	-144.368
				8.50971	-75.6589
				-2.14971	8.53403
				-14.4301	83.1619
				-25.9397	135.31
				-34.83	163.016
				-39.98	170.639
				-41.4757	164.164
				-40.2252	148.369
				-37.0345	126.425
				-32.3281	101.286
				-26.5404	77.1127
				-20.4836	58.6488
				-15.1036	49.1247
				-10.8152	48.6865
				-7.12612	53.6056
				-2.62118	56.9255
				4.55156	52.2092
				15.3513	38.5396
				28.5324	21.4477
				40.7973	8.32402
				48.6685	3.34848
				50.6227	6.46197
				47.5693	15.6797
				41.608	29.4341
				34.5611	46.4875
				27.2526	63.6488
				19.8273	74.3922
				12.5298	70.8047
				5.83103	47.6691
				0.198581	6.4366
				-3.77267	-42.9694
				-5.62387	-85.2811
				-5.82803	-107.635
				-5.71382	-106.367
				-6.29447	-87.5158
				-7.48513	-61.6086
				-8.55947	-37.6586
				-9.05703	-20.0783
				-9.00493	-8.97419
				-8.51479	-2.44881
				-7.5205	1.01642
				-5.7591	1.76241
				-2.87859	-0.0600309
				1.19247	-3.01285
				5.92553	-3.71858
				10.3373	2.48024
				13.4432	19.6367
				14.602	47.8597
				13.6459	79.0338
				11.2208	95.5587
				9.01869	77.7253
				8.67448	18.8328
				10.1571	-65.008
				11.8662	-142.923
				12.0379	-188.527
				9.87223	-193.404
				5.99054	-167.411
				1.74354	-128.758
				-2.20694	-92.6941
				-6.11651	-67.0221
				-10.1702	-53.229
				-14.0271	-48.5701
				-17.1164	-48.3605
				-19.0126	-48.2811
				-19.749	-45.7559
				-19.7038	-40.1871
				-19.1935	-32.4348
				-18.4645	-24.143
				-17.7732	-17.0385
				-16.9876	-11.9405
				-15.315	-8.21915
				-12.0005	-4.6805
				-7.25842	-0.77594
				-2.19131	3.34051
				1.96631	7.32642
				4.43379	10.8963
				5.01919	13.8443
				3.87687	15.9474
				1.44725	16.7788
				-1.36253	15.5048
				-3.5015	11.0929
				-4.39839	3.24916
				-4.01392	-6.68177
				-2.44846	-15.8366
				0.360285	-20.7688
				4.71643	-18.5011
				10.6662	-7.79465
				17.0234	9.54838
				21.5337	29.0454
				22.6657	46.2718
				20.7675	59.2161
				17.2494	67.7124
				13.3271	71.706
				9.75868	70.8784
				6.94955	65.3368
				4.79686	56.192
				2.91954	45.3263
				1.27592	34.572
				0.182633	25.4038
				-0.318033	19.0471
				-0.671032	16.1205
				-1.26473	16.1062
				-1.93042	17.55
				-2.02699	19.0977
				-1.25235	20.158
				-0.427634	20.4033
				-0.837051	19.1357
				-2.67249	15.4057
				-4.60764	8.68847
				-4.96739	-0.188221
				-3.10666	-8.86656
				0.223868	-14.9826
				3.6496	-17.7791
				6.40124	-17.8757
				8.65686	-16.2041
				10.6177	-13.4983
				11.6848	-10.188
				10.6497	-6.46889
				6.66537	-2.44564
				0.208976	1.74227
				-7.05106	5.78531
				-13.2835	9.20765
				-17.1547	11.5574
				-17.9264	12.6538
				-15.3813	12.6826
				-9.57211	11.9405
				-0.624549	10.4316
				10.834	7.74299
				22.9096	3.45943
				32.777	-1.99639
				38.0495	-7.09223
				37.5529	-10.3643
				31.5858	-11.7976
				22.5823	-12.6435
				15.3209	-14.119
				15.3187	-16.4369
				26.0131	-18.8853
				46.816	-20.7142
				73.0184	-21.7325
				96.8328	-21.9261
				108.682	-20.844
				99.0923	-17.6606
				62.432	-11.7199
				1.3977	-3.0148
				-71.9779	7.49504
				-140.859	17.8221
				-190.398	25.3794
				-212.448	27.7273
				-206.524	23.5242
				-177.654	13.6711
				-133.476	1.33766
				-82.3622	-10.0062
				-32.0122	-18.3911
				12.0179	-23.1656
				46.7378	-24.2642
				71.054	-22.1787
				85.3454	-17.9435
				91.4572	-12.814
				92.5213	-8.0275
				92.0543	-4.53843
				92.094	-2.57315
				92.0052	-1.50035
				89.3482	-0.422509
				81.2804	1.12344
				65.0508	3.04731
				38.5566	5.00281
				1.98442	6.72378
				-40.2347	7.93691
				-78.984	7.97673
				-102.869	6.20761
				-102.953	2.89222
				-77.1492	-1.04377
				-31.3905	-4.89383
				22.7374	-8.43142
				71.8617	-11.6823
				103.884	-14.6105
				109.135	-16.8534
				80.6945	-17.7124
				16.5373	-16.3996
				-76.6505	-12.3026
				-182.785	-5.10135
				-281.367	4.97349
				-354.178	16.7422
				-389.049	28.3123
				-380.805	37.8373
				-332.047	43.8475
				-253.631	45.2811
				-162.253	41.7958
				-74.8034	34.1993
				-2.51791	24.652
				51.2501	16.1437
				88.7177	10.9276
				114.071	9.17429
				131.389	9.26686
				143.712	9.1001
				152.484	7.16367
				157.756	3.0951
				159.192	-2.36568
				157.273	-8.08378
				153.921	-13.3381
				151.851	-17.8394
				152.909	-21.2415
				156.59	-23.0803
				159.973	-23.0485
				159.591	-21.1488
				153.499	-17.7522
				141.442	-13.5926
				123.862	-9.60283
				101.412	-6.45742
				75.5483	-3.98646
				49.4249	-1.27519
				27.3401	2.25334
				12.7911	6.02785
				7.04253	8.89196
				9.21063	10.1655
				17.3481	9.85232
				29.3592	8.21677
				43.0695	5.51297
				55.6402	1.99482
				63.2624	-1.90416
				62.6309	-5.53941
				53.5843	-8.36322
				39.4845	-10.0661
				24.0682	-10.2621
				7.73521	-8.33374
				-13.307	-3.86189
				-44.0698	2.73338
				-85.5615	9.80899
				-131.088	14.6997
				-167.996	14.7951
				-184.552	9.06922
				-176.788	-1.0157
				-150.225	-11.6079
				-115.926	-17.7639
				-84.7716	-16.383
				-63.5866	-8.81663
				-53.4767	0.210974
				-50.3274	6.55115
				-47.8726	8.95454
				-41.6142	8.28714
				-30.7851	6.11022
				-17.3682	4.05875
				-3.81972	3.34523
				7.98417	4.16034
				16.1233	5.60511
				18.1045	6.37672
				11.8672	5.57494
				-2.34108	2.93722
				-21.0091	-1.36805
				-38.1487	-6.63557
				-47.9976	-11.0164
				-48.5209	-11.0782
				-41.9946	-2.07684
				-31.8211	20.5391
				-19.9537	57.918
				-7.20834	104.595
				5.52436	149.138
				17.054	178.347
				26.802	179.353
				35.3725	140.619
				43.3174	59.5482
				49.3357	-47.332
				50.6372	-148.315
				45.7729	-217.923
				37.1346	-253.408
				30.6053	-267.876
				32.5135	-271.12
				45.6655	-259.695
				67.047	-224.191
				89.3133	-164.075
				104.715	-92.1861
				108.131	-25.0625
				98.1715	27.0796
				77.0158	61.7674
				49.2913	80.4927
				20.8192	85.4699
				-2.05189	79.227
				-13.5497	65.6306
				-10.7059	49.9615
				4.5462	37.5723
				25.4179	32.1525
				43.1316	34.5766
				50.8141	42.9531
				46.3687	53.943
				33.435	64.3694
				19.5854	71.9798
				11.9522	75.4533
				13.0981	74.4578
				20.4932	69.9301
				29.4627	63.9552
				35.82	58.7122
				36.1835	55.2018
				28.3667	52.8844
				13.2183	50.2087
				-4.8851	45.5566
				-20.49	38.1518
				-30.1975	28.3767
				-34.1247	17.5744
				-35.0052	7.70249
				-35.8151	0.617634
				-38.0395	-3.00652
				-41.6301	-4.19878
				-45.8485	-4.91431
				-50.0584	-6.41765
				-54.1913	-8.40909
				-58.8164	-9.9594
				-64.9039	-11.0382
				-73.4569	-12.7926
				-84.8194	-16.4586
				-97.782	-22.1376
				-109.624	-28.551
				-117.511	-33.7274
				-119.928	-35.8609
				-116.992	-34.0387
				-109.752	-28.6485
				-99.5067	-21.0457
				-88.0068	-12.8452
				-77.8179	-5.50429
				-71.6314	0.0523294
				-70.7508	3.79937
				-74.0379	6.32501
				-77.8735	8.01627
				-76.9522	8.57354
				-66.0477	7.33534
				-42.4522	4.03277
				-7.97186	-0.858954
				30.6796	-6.31742
				63.8849	-11.0791
				82.9828	-13.9691
				83.9204	-14.3071
				68.536	-12.1533
				42.8628	-8.10538
				14.2405	-3.0059
				-10.8024	1.89627
				-27.831	4.89713
				-34.9006	4.44739
				-31.8513	-0.163777
				-19.813	-8.41743
				-1.35478	-18.4108
				20.1471	-27.3576
				41.9294	-32.8722
				62.5733	-34.1824
				81.4072	-32.3261
				97.3999	-29.1665
				109.239	-26.0941
				116.906	-23.4925
				122.625	-21.094
				129.725	-18.7192
				140.562	-16.6404
				154.973	-15.1294
				169.354	-13.9819
				176.788	-12.6299
				169.38	-10.3554
				142.345	-6.53089
				97.0998	-1.02782
				41.4428	5.69666
				-13.2224	12.888
				-56.6735	19.6608
				-83.9017	25.0762
				-95.4939	28.4647
				-95.2451	29.8394
				-87.7075	29.8884
				-76.8381	29.437
				-65.6006	28.9602
				-55.9395	28.5974
				-48.8359	28.3322
				-44.265	28.0289
				-41.0177	27.6008
				-36.8236	27.1347
				-28.9091	26.3384
				-14.9095	23.8737
				6.29472	17.982
				34.2147	8.10266
				65.6951	-4.41119
				93.6054	-17.0685
				108.769	-27.312
				105.011	-33.1536
				82.645	-33.7246
				48.0399	-29.723
				10.8716	-23.1105
				-19.0273	-15.9885
				-34.8326	-9.53482
				-35.3806	-3.96497
				-25.8793	0.724853
				-16.4299	4.48933
				-18.8623	7.62157
				-42.0921	10.6736
				-87.4854	13.7409
				-146.468	16.0862
				-201.857	16.4522
				-233.528	13.8148
				-227.188	8.2817
				-181.684	1.40315
				-109.372	-4.67968
				-29.8068	-8.52081
				37.9065	-9.84727
				80.6167	-9.27179
				94.0203	-7.99755
				82.7267	-7.35402
				57.1686	-7.82285
				28.3206	-8.40941
				3.27	-7.38938
				-15.6984	-3.85391
				-28.9	1.5272
				-36.6791	7.20112
				-38.5494	11.9647
				-33.7276	15.2703
				-21.8916	16.5907
				-3.6261	15.288
				19.5747	11.3553
				45.4888	5.82188
				71.3186	0.267507
				94.5224	-3.94686
				114.289	-6.15863
				131.838	-6.46318
				148.983	-5.44896
				166.307	-3.73495
				181.975	-1.64674
				191.822	0.701214
				190.985	3.23313
				176.469	5.91388
				149.333	8.65293
				114.882	11.12
				79.9267	12.913
				48.4971	13.8669
				19.4846	13.9716
				-11.8321	13.2221
				-49.6659	11.7495
				-93.9387	9.82656
				-139.73	7.62438
				-180.871	5.1646
				-214.622	2.61774
				-242.213	0.533763
				-264.744	-0.413294
				-280.256	0.153617
				-285.489	2.26122
				-278.723	5.62066
				-259.913	9.33339
				-229.242	11.7696
				-186.555	11.2045
				-132.53	6.71209
				-70.4694	-1.41597
				-6.00429	-11.7157
				55.9884	-21.909
				114.081	-29.4954
				168.629	-32.4258
				216.767	-29.8458
				250.041	-22.7243
				257.634	-13.6942
				232.272	-5.60741
				174.945	0.227218
				96.1549	4.29349
				12.8209	7.50672
				-58.2303	10.0684
				-106.773	11.5846
				-131.728	11.6702
				-138.469	10.052
				-133.03	6.33182
				-117.059	0.337621
				-87.2721	-7.1507
				-40.2709	-14.6425
				21.7239	-20.9191
				89.9214	-25.5095
				152.914	-28.5483
				201.41	-30.3624
				230.869	-31.0906
				241.709	-30.6998
				237.904	-29.2636
				224.979	-27.0146
				208.205	-24.2013
				191.127	-21.1445
				174.329	-18.2697
				155.536	-15.738
				131.824	-13.0624
				101.743	-9.30785
				65.0774	-3.70652
				20.5395	3.86659
				-36.1212	12.5623
				-109.471	20.5791
				-196.526	26.0269
				-281.168	27.944
				-339.396	26.5191
				-353.49	22.752
				-323.014	18.0301
				-263.729	13.6765
				-197.448	10.6003
				-141.661	9.35523
				-103.935	10.4364
				-81.7619	14.1997
				-66.5817	20.4536
				-49.6698	28.3006
				-27.2318	36.2649
				-2.15133	42.4503
				18.6024	44.7607
				29.4286	41.4534
				31.1271	32.028
				32.3233	17.8417
				46.0847	1.82908
				82.6325	-12.6864
				141.437	-23.3601
				207.663	-29.378
				256.957	-31.2115
				268.175	-30.3059
				236.44	-28.71
				176.551	-28.5555
				114.234	-31.5114
				72.604	-37.9906
				63.1055	-46.4364
				83.3337	-53.5728
				119.282	-55.8802
				150.682	-51.4008
				158.532	-40.3931
				132.489	-24.6023
				75.0409	-6.36455
				0.596919	11.6314
				-70.2112	26.4024
				-119.483	35.552
				-140.053	38.5813
				-137.026	37.0517
				-122.212	33.396
				-107.206	29.6245
				-100.462	26.8678
				-107.817	25.7072
				-133.268	26.5457
				-178.803	29.5653
				-242.992	34.4743
				-318.325	40.2937
				-389.293	45.3211
				-434.32	47.5267
				-433.236	45.4569
				-377.769	39.0477
				-277.176	29.5393
				-153.537	18.5933
				-31.3119	7.67357
				70.1436	-1.84453
				138.992	-8.59529
				172.075	-11.713
				175.971	-11.6004
				164.3	-10.1476
				150.349	-9.69197
				140.324	-11.3865
				132.698	-14.5773
				123.305	-17.6874
				110.158	-19.3336
				93.9855	-18.6394
				77.0237	-15.3951
				62.7417	-10.5277
				55.3085	-6.08496
				58.1417	-4.31125
				72.5851	-6.38032
				96.6858	-11.6939
				124.047	-18.2675
				144.758	-23.7355
				148.82	-26.2229
				130.032	-24.7902
				89.7054	-19.4168
				38.3652	-10.9427
				-8.14884	-1.30635
				-36.3743	6.72428
				-40.6393	10.8969
				-23.516	10.6702
				7.47065	7.159
				44.4192	2.31925
				82.1576	-2.1394
				117.894	-5.65364
				147.832	-8.577
				164.173	-11.1302
				155.744	-12.9027
				112.372	-13.1511
				31.4023	-11.1774
				-75.9872	-6.76001
				-183.503	-0.772305
				-258.233	4.73116
				-275.848	7.35228
				-231.938	5.57647
				-143.123	-0.278467
				-39.116	-8.14275
				49.917	-15.4439
				103.943	-20.2251
				116.575	-21.2866
				92.9693	-18.263
				46.5576	-12.1542
				-4.13207	-5.23666
				-40.6342	0.224983
				-51.3679	3.10851
				-35.6863	3.36704
				-2.43622	1.69398
				34.9831	-0.509595
				63.8628	-1.62635
				76.5996	-0.853083
				73.6967	1.30016
				62.9808	3.61353
				54.288	5.05911
				53.1345	5.18056
				57.8386	4.13797
				62.1286	2.64282
				60.5961	1.61451
				51.7708	1.6246
				37.3524	2.60317
				19.9759	4.05694
				1.43581	5.3793
				-17.5586	6.03667
				-36.3948	5.82634
				-53.9965	4.94697
				-68.8167	3.81532
				-78.6906	3.00169
				-81.1874	3.16171
				-74.9434	4.92233
				-60.9988	8.80183
				-42.7443	14.7854
				-24.4918	21.9379
				-10.424	28.6328
				-4.69386	32.8527
				-10.706	32.67
				-28.1534	27.4003
				-50.5559	18.2999
				-67.1999	7.7999
				-68.5557	-1.91656
				-50.9133	-9.67427
				-18.2522	-15.1164
				18.7936	-18.2871
				46.7275	-19.4045
				54.1333	-18.6381
				35.8242	-15.8887
				-5.40893	-10.9526
				-60.5186	-4.28351
				-117.842	2.50113
				-165.805	7.33403
				-194.113	8.99379
				-195.05	7.65153
				-165.685	4.29223
				-109.42	-0.184641
				-34.9593	-5.23138
				47.0407	-10.3761
				126.919	-15.0284
				196.494	-18.4294
				248.652	-19.8006
				278.407	-19.1011
				284.994	-17.5862
				272.819	-16.9333
				250.258	-17.915
				226.975	-20.2061
				211.355	-23.0504
				209.357	-25.8011
				223.087	-28.0757
				246.428	-29.5828
				260.464	-29.6439
				235.486	-26.8995
				143.607	-19.6421
				-21.9021	-6.5713
				-234.171	12.0794
				-441.095	33.283
				-591.497	51.1712
				-658.643	59.6094
				-645.26	56.311
				-573.223	44.5241
				-470.34	30.3741
				-361.849	18.9223
				-267.132	12.5493
				-198.632	11.6217
				-160.208	15.3155
				-146.426	21.8087
				-146.518	28.592
				-151.059	33.3118
				-155.44	34.5707
				-158.543	32.1103
				-159.006	26.6269
				-152.672	19.5061
				-134.177	12.3697
				-100.754	6.57323
				-54.0091	2.79408
				0.932883	0.638467
				57.7639	-1.28685
				111.658	-4.47804
				160.239	-9.4963
				202.649	-15.4566
				238.583	-20.3254
				267.246	-22.2929
				285.885	-21.2765
				290.071	-18.9046
				276.428	-16.99
				245.429	-16.1357
				202.48	-15.7336
				156.753	-14.8966
				118.303	-13.0742
				95.2026	-10.0822
				91.7003	-6.15525
				107.571	-2.2343
				138.727	0.183997
				178.256	0.0211073
				217.173	-2.57094
				246.013	-6.5172
				258.23	-10.7779
				252.963	-14.8767
				234.047	-18.6125
				206.877	-21.5423
				176.668	-22.8917
				148.314	-22.055
				126.334	-19.2953
				114.363	-15.8094
				114.014	-12.9588
				123.587	-11.4926
				137.833	-11.3606
				149.143	-11.7172
				149.679	-10.9469
				133.846	-7.44669
				100.018	-1.01085
				50.0397	6.62087
				-13.0362	12.7904
				-85.3602	15.6055
				-159.511	14.8328
				-223.197	11.6727
				-263.307	8.04344
				-272.456	5.76246
				-252.443	5.82786
				-212.637	8.13616
				-165.716	11.5977
				-123.604	14.3569
				-94.3559	14.4154
				-80.4407	10.7828
				-79.1028	4.32951
				-83.9907	-2.3009
				-87.2155	-5.87355
				-82.2319	-4.65153
				-66.8088	0.177777
				-44.0071	5.46796
				-20.4016	8.45098
				-2.90395	7.99637
				3.61956	4.43172
				-2.5719	-0.890168
				-19.3344	-6.09426
				-40.8793	-9.72639
				-60.1358	-11.4966
				-71.7926	-12.0155
				-73.7237	-11.8704
				-66.4397	-11.079
				-52.0372	-9.33691
				-33.9761	-6.43353
				-16.8911	-2.27097
				-4.72906	3.16739
				1.85716	9.4328
				6.11478	15.2604
				12.9146	19.0478
				25.0649	19.876
				40.6394	17.9838
				53.2391	14.4037
				55.411	10.3346
				43.5402	6.69901
				21.2124	4.03278
				-1.80346	2.59884
				-15.2919	2.3851
				-15.1958	2.96045
				-5.63172	3.60859
				5.07117	3.75295
				10.459	3.09791
				9.3732	1.44344
				4.85753	-1.2668
				0.450381	-4.62768
				-2.57906	-7.66896
				-5.10693	-9.28044
				-8.43873	-8.95684
				-13.5	-7.10424
				-21.1378	-4.58141
				-32.0238	-2.0023
				-46.2294	0.668079
				-63.4377	3.7476
				-83.4035	6.7678
				-105.665	8.08925
				-128.292	6.14507
				-146.885	1.26314
				-155.618	-3.84376
				-149.933	-5.83543
				-128.395	-3.32357
				-92.9546	2.18716
				-48.5952	7.52881
				-1.84706	9.87896
				41.5364	8.20295
				77.3438	3.59492
				102.908	-1.41433
				118.956	-4.38585
				130.354	-4.81555
				141.884	-4.82885
				152.981	-7.5294
				157.628	-14.11
				149.368	-22.4546
				127.148	-28.4723
				97.6342	-28.9787
				71.9724	-24.2319
				59.707	-18.0749
				64.5513	-14.7938
				83.3219	-15.5949
				107.315	-18.4338
				126.021	-20.3034
				131.19	-18.8613
				118.201	-12.8992
				85.9987	-2.55846
				38.7308	10.5216
				-12.6932	23.4973
				-54.0166	33.5964
				-75.4513	39.631
				-76.627	41.9252
				-64.3603	41.1125
				-47.0221	37.9021
				-31.4318	33.522
				-23.8254	29.2285
				-30.9683	25.3245
				-57.3943	21.2543
				-101.204	16.7629
				-154.012	12.6651
				-205.618	10.3518
				-248.955	10.3044
				-281.355	10.9096
				-302.079	9.26529
				-309.29	3.60191
				-299.659	-5.15584
				-270.92	-13.91
				-224.983	-19.195
				-169.063	-19.1339
				-113.674	-14.3535
				-68.14	-7.12041
				-36.7261	0.356752
				-18.3371	6.83129
				-9.14797	11.771
				-4.93955	14.7765
				-1.30675	15.2787
				6.81601	12.6843
				23.7901	6.94222
				50.7169	-1.10337
				84.8098	-9.83323
				121.184	-16.9315
				154.561	-20.0239
				179.47	-18.3529
				190.362	-13.4812
				183.005	-7.89739
				156.239	-3.47912
				112.9	-1.0058
				59.7771	-0.202744
				7.07213	-0.276044
				-32.8438	-0.755281
				-48.2349	-1.86218
				-31.8646	-4.20506
				16.1878	-8.25475
				88.6789	-14.0221
				174.461	-20.9901
				262.592	-28.2179
				344.455	-34.7326
				413.215	-40.0182
				462.288	-44.0402
				485.095	-46.7883
				477.486	-47.7224
				441.549	-45.7505
				387.008	-40.2438
				327.478	-31.9758
				272.437	-22.574
				219.007	-13.1251
				150.137	-3.41784
				44.2745	7.54417
				-106.867	20.0721
				-284.834	32.4714
				-447.491	41.1196
				-549.619	42.3118
				-567.15	35.1425
				-507.135	23.0778
				-397.956	11.6905
				-270.164	4.45941
				-143.383	1.21406
				-25.8872	-0.291872
				78.8969	-2.43046
				167.435	-6.54225
				235.222	-12.2835
				277.724	-17.8065
				291.085	-21.0428
				273.075	-20.9969
				225.63	-17.9143
				157.101	-12.6848
				80.0016	-6.34116
				5.02306	0.190514
				-62.1343	6.00598
				-118.963	10.0063
				-164.502	11.4394
				-200.11	10.8631
				-229.761	10.0645
				-258.766	10.9812
				-291.149	14.7516
				-325.968	21.1671
				-355.958	28.6561
				-371.711	35.0247
				-368.815	38.2724
				-351.374	37.0589
				-327.657	31.2564
				-302.444	22.4765
				-275.786	13.8455
				-249.205	8.83762
				-229.458	9.74792
				-223.281	16.5752
				-228.39	27.1014
				-231.141	37.9951
				-214.214	45.715
				-166.619	47.2677
				-87.1089	41.4064
				18.8088	29.3135
				142.11	13.803
				270.846	-2.16847
				389.867	-16.1767
				481.537	-26.141
				528.089	-30.441
				516.495	-28.6213
				445.411	-21.7994
				329.996	-12.0942
				198.758	-1.57323
				81.8772	8.22746
				-0.455602	16.0201
				-41.0666	20.4862
				-42.3117	20.5537
				-13.5582	15.9899
				29.7228	7.68774
				70.1797	-2.6273
				96.2529	-13.0141
				107.39	-22.062
				112.762	-29.4485
				124.866	-35.639
				151.851	-40.9279
				191.82	-44.9221
				231.614	-46.6499
				252.059	-44.7988
				237.761	-38.3795
				184.556	-27.7386
				100.096	-14.7348
				0.644076	-1.84857
				-92.1339	8.83054
				-156.188	16.1182
				-176.978	19.5801
				-153.863	19.1801
				-100.635	15.4549
				-39.7614	9.8231
				6.68106	4.15784
				24.2197	-0.271772
				8.42635	-3.52432
				-35.6187	-6.57588
				-94.6176	-10.1363
				-149.622	-13.8331
				-180.571	-16.5013
				-172.104	-17.2518
				-119.364	-16.1344
				-31.1678	-13.936
				72.3005	-11.843
				166.631	-11.1716
				231.22	-12.7522
				254.888	-16.2568
				237.68	-20.33
				188.652	-23.5914
				120.401	-25.2156
				42.9777	-24.3962
				-38.4418	-20.0441
				-120.164	-11.5726
				-194.976	0.404671
				-252.016	14.1482
				-282.291	27.1053
				-283.506	36.5116
				-259.989	40.4676
				-220.137	38.7377
				-173.196	32.739
				-125.414	24.9214
				-78.4687	17.8444
				-32.2727	13.386
				11.3096	12.4668
				47.9702	15.0454
				73.789	19.7438
				89.5036	23.412
				103.191	21.9683
				127.021	12.6851
				167.426	-3.77827
				215.657	-23.0428
				247.68	-38.4584
				235.806	-43.9868
				166.609	-37.4932
				53.8646	-22.2788
				-65.0813	-5.38202
				-150.032	6.56036
				-181.856	11.1892
				-171.967	11.1511
				-149.962	11.1183
				-139.666	13.8188
				-143.786	18.5542
				-148.409	22.7473
				-139.972	24.2515
				-118.359	22.5601
				-96.3386	18.6414
				-88.9082	14.1468
				-103.529	10.8231
				-137.612	10.0076
				-181.27	11.8615
				-221.494	14.9634
				-246.289	17.1015
				-247.927	16.7122
				-224.02	13.5246
				-176.231	8.16739
				-108.743	1.59952
				-28.4328	-5.12719
				54.5074	-10.9638
				127.56	-15.004
				178.81	-16.5393
				200.982	-15.1835
				194.699	-11.3277
				169.018	-6.53504
				138.432	-3.01284
				116.294	-2.17594
				107.302	-3.80204
				105.367	-6.63087
				100.447	-9.33638
				88.4575	-10.9366
				74.2486	-10.928
				65.8246	-9.54066
				67.4443	-7.82009
				77.856	-7.02476
				92.7036	-7.74831
				107.202	-9.79392
				117.444	-12.7969
				121.34	-16.5265
				119.69	-20.6005
				116.095	-24.4144
				115.162	-27.4163
				119.995	-29.2003
				130.415	-29.3592
				143.38	-27.4558
				155.454	-23.4099
				164.852	-17.966
				171.422	-12.393
				175.017	-7.43407
				173.597	-2.66913
				162.205	2.96904
				134.281	10.0665
				86.1184	18.0429
				20.8372	25.2727
				-52.2555	29.9096
				-120.689	31.1466
				-170.861	29.649
				-190.889	26.522
				-175.545	22.2016
				-129.173	16.3437
				-63.7333	8.56425
				5.19838	-0.447088
				62.086	-8.66539
				95.8571	-14.0174
				104.736	-15.8181
				97.1421	-14.9876
				85.8402	-13.3672
				79.6141	-12.7912
				79.3087	-14.0628
				79.2595	-16.2363
				69.648	-17.0536
				37.1308	-14.2641
				-32.9985	-6.49993
				-148.175	6.4114
				-296.299	22.958
				-442.797	39.5184
				-545.1	51.0214
				-574.671	53.3724
				-529.739	46.4344
				-432.329	34.3964
				-315.177	22.6725
				-207.962	14.5773
				-128.487	10.5699
				-79.8707	9.51024
				-53.8074	9.85497
				-38.1026	10.1072
				-24.1881	9.23206
				-11.0822	6.94804
				-4.79905	3.66109
				-13.7441	0.469577
				-41.7035	-1.19438
				-82.7669	-0.757533
				-122.6	0.665713
				-144.695	1.01246
				-136.522	-1.16225
				-92.8042	-5.83164
				-16.5631	-11.8622
				80.8778	-17.9328
				181.353	-23.0334
				263.086	-26.3046
				305.929	-26.9157
				299.123	-24.4479
				248.007	-19.383
				173.631	-13.1238
				104.97	-7.44628
				68.3147	-3.84933
				77.9275	-3.29258
				131.579	-6.20065
				212.678	-12.2726
				296.873	-20.0523
				360.009	-27.0662
				385.136	-31.0683
				366.828	-31.3345
				311.387	-28.7409
				233.257	-24.7476
				150.228	-20.2979
				78.8487	-15.7077
				30.1236	-11.5141
				7.29012	-8.80712
				6.85417	-8.41383
				21.118	-10.1445
				40.3558	-12.7483
				54.8874	-14.1863
				57.6472	-12.3086
				46.2287	-5.98625
				22.705	3.97525
				-9.00119	14.9573
				-46.1551	23.8299
				-88.1687	28.5769
				-134.957	29.1593
				-184.295	27.2053
				-230.201	24.8276
				-262.716	23.2997
				-269.008	22.4651
				-238.236	21.32
				-170.505	19.2285
				-81.9237	16.5365
				1.40992	13.8774
				55.6287	11.2722
				68.1994	8.51752
				40.9487	6.20257
				-12.5347	5.77705
				-73.8746	8.47133
				-126.979	14.056
				-161.273	20.6259
				-171.623	25.7739
				-158.243	27.989
				-127.82	26.8844
				-92.821	22.6722
				-66.3253	16.1163
				-55.1542	8.74134
				-56.4796	2.5214
				-59.8323	-0.819758
				-52.9808	-0.551231
				-28.4699	2.53002
				13.041	6.29044
				63.6628	8.30547
				111.379	7.16675
				144.05	3.31519
				153.257	-1.10472
				136.736	-3.37553
				99.5457	-1.70727
				53.8486	3.85411
				16.213	11.5212
				2.99892	18.3199
				25.4654	20.9332
				84.4389	17.0573
				165.39	6.65541
				239.658	-7.58251
				276.116	-20.9365
				256.351	-28.8262
				180.651	-29.3075
				62.9379	-23.6573
				-75.5067	-14.8029
				-207.905	-5.72832
				-304.264	0.893934
				-339.68	2.86883
				-305.857	-0.774142
				-216.328	-9.18157
				-99.6453	-19.8703
				14.4068	-29.7178
				104.878	-36.2233
				161.202	-38.1811
				180.883	-35.6296
				168.203	-29.6618
				133.466	-22.3759
				91.5878	-16.6162
				58.5637	-15.093
				44.4755	-18.9696
				46.6743	-26.7087
				49.5839	-34.608
				32.683	-39.1571
				-18.9108	-38.6882
				-107.191	-32.8331
				-218.569	-21.9364
				-326.627	-7.85781
				-401.999	5.83504
				-426.181	15.7028
				-400.7	20.4791
				-344.556	21.2382
				-281.599	20.0063
				-227.714	18.3655
				-186.368	17.0104
				-152.608	16.1283
				-119.371	15.702
				-81.6783	15.2911
				-38.6766	13.8991
				6.45244	10.4416
				48.7036	4.50766
				83.9068	-3.23507
				110.41	-11.4928
				129.631	-19.1581
				145.71	-25.1132
				163.702	-27.5333
				186.443	-24.7774
				212.935	-17.0111
				239.481	-5.8752
				260.49	7.00871
				267.56	20.255
				251.431	32.3011
				209.136	41.7949
				149.302	47.8121
				88.8529	49.3286
				44.4355	45.3912
				25.9134	36.3149
				34.3812	24.2179
				62.9178	11.9637
				98.7601	1.70374
				127.219	-5.34855
				137.307	-8.16058
				126.436	-5.88299
				100.499	1.00854
				69.6118	10.1079
				43.4685	17.9979
				28.9148	21.742
				29.3461	19.8876
				44.3811	12.7233
				69.4982	1.9482
				96.6522	-9.70297
				116.249	-18.7684
				120.222	-22.1305
				105.459	-18.7298
				75.4595	-10.058
				38.4262	1.30207
				3.14948	13.1797
				-23.7823	23.6611
				-37.9476	30.2258
				-36.4902	30.2074
				-19.182	22.8207
				10.0017	10.5692
				43.1069	-1.94909
				70.5268	-10.8293
				83.5636	-14.6233
				74.8535	-13.9681
				37.8804	-10.1319
				-30.1576	-4.14863
				-123.064	3.05061
				-224.1	10.1952
				-311.159	15.6544
				-366.731	18.2367
				-386.921	18.0759
				-381.82	16.4009
				-365.866	14.4959
				-346.43	12.9931
				-319.396	11.7076
				-273.447	9.79376
				-198.842	6.20453
				-94.7002	0.153675
				28.8998	-8.62422
				153.503	-19.5152
				257.812	-30.7867
				324.934	-40.2835
				349.065	-46.7568
				337.447	-50.4039
				304.448	-52.0293
				260.928	-51.7817
				208.614	-48.9605
				146.338	-43.2323
				81.437	-35.7321
				31.0658	-28.5836
				10.34	-23.4769
				21.4006	-20.8748
				53.5073	-20.0903
				89.2808	-19.529
				110.034	-17.0886
				100.276	-11.1702
				53.3292	-1.90879
				-24.858	8.52903
				-117.969	17.1073
				-206.551	21.8314
				-276.198	22.9373
				-323.421	22.398
				-356.647	22.6261
				-391.067	25.6143
				-437.663	32.165
				-491.566	40.9463
				-530.317	48.337
				-526.677	49.963
				-467.052	43.753
				-361.397	32.0594
				-237.868	20.2366
				-127.749	12.9907
				-51.5844	11.6982
				-13.0922	14.1149
				-0.569975	16.2911
				6.74707	15.2665
				29.0999	10.3261
				76.6383	2.21153
				144.818	-7.77214
				217.365	-17.5254
				275.011	-24.2311
				305.236	-25.8088
				308.309	-22.4376
				296.702	-16.6128
				288.215	-11.8181
				297.071	-10.7901
				327.53	-14.3618
				371.715	-21.3891
				412.556	-29.2903
				432.461	-34.8129
				423.875	-35.4367
				392.921	-30.9342
				351.707	-23.4627
				306.882	-15.8216
				255.806	-9.36853
				192.272	-3.20873
				114.657	4.54134
				30.1764	14.2277
				-46.4887	23.4919
				-99.5562	29.1656
				-119.976	30.1532
				-109.651	27.8509
				-79.5271	24.2491
				-42.9541	20.4564
				-9.1772	16.7151
				18.2245	13.1071
				38.4562	9.84036
				50.9424	6.84258
				55.7867	3.58398
				55.0217	-0.391818
				51.8559	-4.94301
				48.8108	-9.30445
				46.4551	-12.5284
				42.5789	-14.1277
				32.3315	-14.1978
				11.3625	-12.985
				-18.977	-10.7585
				-50.2534	-8.04555
				-73.1867	-5.56387
				-86.0367	-3.69969
				-95.9943	-2.12197
				-112.289	-0.159937
				-137.919	2.37184
				-166.723	4.79416
				-187.064	6.02039
				-189.031	5.41431
				-171.054	3.21487
				-141.953	0.321224
				-116.09	-2.07969
				-104.381	-2.86508
				-107.839	-1.52092
				-118.169	1.16923
				-124.454	3.05004
				-120.792	2.01392
				-109.684	-1.89057
				-99.1869	-6.00671
				-95.4581	-7.11294
				-96.6539	-4.15896
				-94.5268	0.825421
				-82.0138	4.6331
				-58.915	5.60235
				-31.542	4.27937
				-8.4131	2.06076
				4.36631	-0.0799471
				5.68677	-1.66807
				-0.864942	-2.05983
				-9.3892	-0.37641
				-14.3328	3.41931
				-12.4281	7.96612
				-4.12088	11.9276
				5.47793	15.5969
				6.99227	20.054
				-9.68673	24.9404
				-48.9366	28.2183
				-105.843	28.2276
				-169.349	25.3183
				-226.549	21.5676
				-264.013	18.9362
				-270.205	17.1377
				-241.516	13.6319
				-186.963	6.78576
				-125.057	-1.00546
				-73.5007	-4.06985
				-39.5071	2.79254
				-17.3979	20.6858
				6.02116	44.642
				42.4702	64.4513
				94.9743	68.8897
				156.012	51.4997
				211.054	14.5644
				244.79	-31.1576
				247.616	-70.987
				221.022	-93.3474
				179.485	-95.614
				145.935	-84.2201
				140.884	-68.8937
				170.908	-56.6429
				224.859	-49.6124
				280.547	-46.0293
				315.589	-42.2721
				314.41	-35.1027
				270.17	-23.6451
				185.164	-10.171
				70.9867	1.42094
				-52.9116	8.41463
				-162.513	10.79
				-233.919	10.3927
				-249.958	8.89006
				-207.744	6.58221
				-122.622	3.06946
				-23.8038	-1.58237
				57.9323	-6.62236
				104.364	-11.0476
				117.644	-13.9113
				116.313	-14.3157
				121.163	-11.5948
				141.546	-6.08988
				172.332	0.148507
				200.9	3.9451
				216.86	3.07209
				217.601	-1.73801
				206.162	-6.84572
				185.706	-8.21974
				158.317	-4.41446
				127.913	2.72804
				100.475	9.98881
				79.882	14.9638
				65.3018	16.8406
				52.9725	16.2099
				37.9711	14.6812
				14.0696	14.3844
				-24.9692	17.4535
				-82.2392	25.3978
				-156.711	38.0433
				-244.54	52.6542
				-337.831	64.4663
				-421.317	68.6044
				-473.832	62.1017
				-477.287	45.2815
				-427.38	22.2483
				-337.816	-0.312595
				-233.598	-16.3333
				-137.238	-23.5557
				-58.7335	-23.8121
				2.77362	-20.2717
				48.6593	-14.26
				72.6261	-3.85566
				62.3966	15.1758
				9.02601	46.7317
				-83.7498	90.4579
				-196.732	137.639
				-301.639	170.908
				-372.042	170.733
				-391.579	125.386
				-357.736	38.1143
				-282.432	-72.1853
				-188.194	-176.277
				-99.3095	-243.813
				-31.6762	-256.021
				12.1954	-216.014
				39.4	-145.463
				58.2112	-70.0037
				72.9627	-7.94903
				84.4925	32.6043
				92.5912	52.1305
				97.5736	56.0904
				100.741	51.126
				104.162	42.5453
				109.881	33.6037
				119.015	25.9727
				131.259	20.2293
				144.962	16.1199
				157.768	12.9868
				167.521	10.1785
				172.982	7.32356
				174.212	4.48915
				172.241	1.76706
				167.847	-1.39683
				160.777	-5.92443
				150.58	-11.7815
				137.71	-17.2478
				123.332	-20.2371
				108.724	-20.3872
				95.4093	-19.5024
				85.3388	-20.313
				80.6168	-24.8415
				82.923	-33.2154
				92.2236	-43.5723
				105.948	-52.7809
				121.04	-57.3721
				137.753	-54.986
				160.567	-45.9532
				193.964	-33.4915
				237.558	-21.9305
				286.36	-14.2277
				334.82	-10.829
				379.597	-10.6794
				419.9	-13.057
				456.475	-18.0488
				488.889	-25.1752
				511.959	-32.4462
				515.099	-37.7438
				487.112	-40.8116
				424.278	-43.1328
				334.568	-46.095
				231.596	-49.7361
				122.748	-52.7632
				4.23556	-52.9028
				-132.461	-46.873
				-291.655	-30.3636
				-468.087	0.52284
				-643.129	45.231
				-786.791	94.7349
				-871.545	133.917
				-889.922	151.558
				-860.461	148.762
				-817.021	137.381
				-790.66	131.051
				-795.781	136.759
				-825.629	151.464
				-857.573	164.449
				-865.362	163.885
				-830.882	143.904
				-749.243	108.097
				-627.015	67.3697
				-475.608	33.2866
				-304.36	11.5585
				-119.591	0.286655
				72.1986	-7.00074
				263.302	-16.8976
				444.333	-32.9108
				602.306	-54.2532
				722.088	-76.6015
				792.119	-94.3832
				809.26	-103.476
				780.258	-103.113
				719.481	-96.0441
				642.963	-86.7388
				562.372	-78.8572
				483.782	-73.6067
				410.596	-69.7597
				344.835	-65.0333
				284.468	-57.4688
				222.075	-45.8272
				149.488	-29.6035
				64.894	-9.68843
				-24.7579	10.8013
				-107.775	27.5483
				-173.417	38.0025
				-215.296	42.9732
				-232.241	44.8857
				-227.501	45.0263
				-207.078	42.9218
				-177.209	37.8925
				-141.9	30.3431
				-103.025	21.4191
				-62.6782	12.0429
				-24.7049	2.69109
				5.30869	-6.09536
				21.3169	-13.2101
				20.2483	-17.2285
				6.60312	-17.6417
				-6.4163	-15.7144
				-3.78964	-13.5958
				19.4138	-12.7708
				52.2173	-13.4165
				75.6162	-14.6655
				79.1647	-15.464
				72.2879	-15.3729
				79.4515	-14.1278
				121.589	-10.0507
				197.642	1.08412
				282.062	24.5466
				343.141	61.0004
				366.114	99.2284
				358.265	115.798
				333.799	89.2228
[truncated: 655 more rows]

## Sheet: Participant 02
MTP_moment	Plantar_Aponuerosis_Length	MTP_angle	Time	AbductorHallucis	FlexorDigitorumBrevis
NaN	NaN	-32.683	0	-16.2606	-45.4982
NaN	NaN	-30.2959	0.00855	-18.6323	-42.3596
NaN	NaN	-27.7237	0.0171	-21.3945	-41.2607
NaN	NaN	-25.2286	0.02565	-24.4429	-42.3142
NaN	NaN	-23.137	0.0342	-26.9775	-43.1355
NaN	NaN	-21.6285	0.04275	-27.6239	-40.8819
NaN	NaN	-20.6611	0.0513	-25.3543	-34.646
NaN	NaN	-20.1559	0.05985	-20.5298	-26.3176
NaN	NaN	-20.001	0.0684	-14.7554	-19.4412
NaN	NaN	-20.0029	0.07695	-9.76072	-17.003
NaN	NaN	-20.0561	0.0855	-6.77431	-19.8329
NaN	NaN	-20.1419	0.09405	-6.53997	-26.4735
NaN	NaN	-20.3031	0.1026	-9.06617	-34.2333
NaN	NaN	-20.5742	0.11115	-13.2515	-40.8174
NaN	NaN	-20.9604	0.1197	-17.3572	-45.3603
NaN	NaN	-21.4302	0.12825	-19.9666	-47.645
NaN	NaN	-21.9305	0.1368	-20.2015	-47.0773
NaN	NaN	-22.4219	0.14535	-17.5954	-43.8151
NaN	NaN	-22.8703	0.1539	-12.3555	-40.1765
NaN	NaN	-23.256	0.16245	-5.10926	-39.923
NaN	NaN	-23.5764	0.171	3.8638	-45.977
NaN	NaN	-23.8406	0.17955	14.4637	-57.6541
NaN	NaN	-24.059	0.1881	26.1451	-70.1058
NaN	NaN	-24.2397	0.19665	38.1689	-77.644
NaN	NaN	-24.3887	0.2052	50.0285	-77.2711
NaN	NaN	-24.5046	0.21375	61.2591	-69.2841
NaN	NaN	-24.582	0.2223	71.2957	-55.9779
NaN	NaN	-24.6177	0.23085	79.7558	-39.7188
NaN	NaN	-24.611	0.2394	86.5635	-21.7071
NaN	NaN	-24.5673	0.24795	91.4238	-1.72177
NaN	NaN	-24.5018	0.2565	93.1323	22.9892
NaN	NaN	-24.4291	0.26505	89.932	57.6861
NaN	NaN	-24.3595	0.2736	81.2584	104.258
NaN	NaN	-24.2956	0.28215	69.1842	153.761
NaN	NaN	-24.236	0.2907	57.6514	189.629
NaN	NaN	-24.1839	0.29925	50.2389	201.893
NaN	NaN	-24.1451	0.3078	48.5419	196.147
NaN	NaN	-24.1222	0.31635	51.812	187.304
NaN	NaN	-24.1165	0.3249	57.6613	185.3
NaN	NaN	-24.1183	0.33345	63.2403	186.491
NaN	NaN	-24.093	0.342	66.0708	179.506
NaN	NaN	-24.0082	0.35055	64.2818	158.225
NaN	NaN	-23.8451	0.3591	56.2251	126.592
NaN	NaN	-23.6137	0.36765	40.4195	93.7766
NaN	NaN	-23.3361	0.3762	16.9988	68.1072
NaN	NaN	-23.0344	0.38475	-10.7999	53.5298
NaN	NaN	-22.7493	0.3933	-37.4812	49.3796
NaN	NaN	-22.5503	0.40185	-58.0234	52.8843
NaN	NaN	-22.5134	0.4104	-69.7908	61.1784
NaN	0.187531	-22.6977	0.41895	-72.7228	71.9735
NaN	0.1875	-23.0685	0.4275	-69.2908	84.0596
NaN	0.187417	-23.5614	0.43605	-63.7655	97.2758
NaN	0.187296	-24.1165	0.4446	-59.7771	112.051
NaN	0.187153	-25.3049	0.45315	-58.2762	129.221
NaN	0.187012	-25.4966	0.4617	-57.5292	149.494
NaN	0.186894	-25.618	0.47025	-54.3462	171.66
NaN	0.186825	-25.7359	0.4788	-46.0257	191.244
NaN	0.186806	-25.8935	0.48735	-32.5103	202.689
NaN	0.186814	-26.0893	0.4959	-17.1731	203.37
NaN	0.186826	-26.3004	0.50445	-5.38667	195.011
NaN	0.186827	-26.5061	0.513	-1.90972	182.099
NaN	0.186818	-26.7058	0.52155	-8.67708	168.877
NaN	0.186802	-26.9065	0.5301	-24.084	156.632
NaN	0.186783	-27.126	0.53865	-44.096	143.572
NaN	0.186767	-27.3722	0.5472	-64.2328	127.385
NaN	0.186756	-27.6419	0.55575	-80.9366	107.652
NaN	0.186753	-27.9329	0.5643	-91.9354	85.7271
NaN	0.186762	-28.2479	0.57285	-96.201	63.3587
NaN	0.186788	-28.5841	0.5814	-94.0352	42.7192
NaN	0.186832	-28.9374	0.58995	-86.9565	26.2976
23.6156	0.186887	-29.3204	0.5985	-76.782	14.5279
21.8796	0.186947	-29.7604	0.60705	-64.7419	4.90452
19.9693	0.187011	-30.2881	0.6156	-51.5142	-4.53395
18.0009	0.187074	-30.9377	0.62415	-37.5733	-12.4106
15.8089	0.187128	-31.7076	0.6327	-23.4778	-16.7774
13.6445	0.187175	-32.5343	0.64125	-10.0839	-19.7825
11.6251	0.187219	-33.3635	0.6498	1.60872	-27.8155
9.57596	0.187268	-34.1974	0.65835	10.9838	-47.1473
7.46162	0.18733	-35.0861	0.6669	18.3001	-80.008
5.50657	0.187401	-36.0733	0.67545	24.5406	-123.632
3.70206	0.187463	-37.1948	0.684	30.528	-171.41
1.95782	0.187497	-38.4671	0.69255	36.1376	-215.628
0.325799	0.18749	-39.8974	0.7011	40.6693	-251.348
-1.29259	0.187439	-41.4971	0.70965	44.0838	-278.769
-2.7936	0.187341	-43.2905	0.7182	47.3673	-301.904
-4.13375	0.187218	-45.3165	0.72675	51.5444	-325.345
-5.26971	0.187091	-47.6503	0.7353	56.7585	-351.813
-5.97244	0.186963	-50.3792	0.74385	62.4215	-381.098
-6.37067	0.186801	-53.4709	0.7524	67.8541	-410.089
-6.46637	0.186543	-56.8549	0.76095	72.4047	-434.15
-6.32737	0.186112	-60.4356	0.7695	75.1794	-449.623
-5.79172	0.185436	-64.014	0.77805	75.3036	-455.567
-5.08451	0.184602	-67.2633	0.7866	72.7067	-453.891
-4.31893	0.183765	-69.7414	0.79515	68.3953	-448.686
-3.39252	0.182615	-70.7591	0.8037	63.8984	-444.467
-2.50913	0.181377	-69.9896	0.81225	60.4456	-443.391
-1.66037	0.180113	-67.4913	0.8208	58.3513	-443.715
-0.954327	0.178873	-64.3687	0.82935	57.1018	-441.331
-0.382744	0.177726	-59.683	0.8379	55.9847	-432.669
-0.027823	0.176778	-54.3935	0.84645	54.4952	-416.209
0.158152	0.176137	-49.297	0.855	52.4584	-392.705
				49.9103	-364.437
				46.6112	-332.936
				41.901	-297.098
				35.3094	-254.17
				27.1041	-203.082
				18.2785	-146.824
				10.1097	-90.8561
				3.37382	-38.8098
				-2.03381	9.83491
				-6.40029	58.0883
				-9.52728	108.332
				-11.058	160.255
				-10.9401	210.631
				-9.58822	255.064
				-7.96112	290.739
				-7.15123	318.044
				-7.6927	339.494
				-9.34548	357.236
				-11.4545	372.248
				-13.5823	385.528
				-15.7642	398.8
				-18.1027	413.574
				-20.5882	429.665
				-23.4987	445.44
				-27.3643	460.383
				-32.2583	477.295
				-37.6182	501.507
				-42.812	536.729
				-47.2184	579.224
				-49.7253	615.298
				-48.9147	627.757
				-44.1758	608.391
				-36.4565	563.952
				-27.7965	508.695
				-20.3034	451.971
				-15.3294	392.713
				-13.0222	323.333
				-12.6578	238.763
				-13.6202	144.563
				-15.8963	58.0241
				-19.716	-0.904024
				-25.1887	-23.1416
				-32.3743	-14.9599
				-41.1232	9.68123
				-50.3992	37.2387
				-57.999	57.5376
				-61.2792	65.2663
				-58.4436	60.2935
				-49.8425	45.2057
				-38.5321	22.4498
				-29.1605	-5.54117
				-25.5162	-34.4183
				-28.2762	-57.9033
				-34.2589	-70.4591
				-37.6549	-71.1996
				-32.9688	-65.8409
				-18.3076	-63.0605
				3.22474	-68.5558
				25.1278	-83.3839
				40.9724	-105.878
				47.4063	-133.305
				44.9536	-162.494
				36.9051	-189.878
				27.5465	-212.335
				20.3194	-229.012
				16.4357	-241.221
				14.853	-249.943
				13.7596	-254.522
				12.0597	-253.983
				9.56374	-248.626
				6.62824	-240.474
				4.10491	-232.806
				3.07643	-228.687
				4.17387	-229.286
				7.2621	-233.509
				11.6135	-238.741
				15.9874	-241.615
				19.0567	-238.689
				20.7082	-227.265
				23.0046	-206.941
				29.4309	-181.215
				42.6812	-156.454
				62.5803	-138.27
				85.7096	-128.81
				106.82	-126.827
				120.665	-129.387
				123.395	-133.704
				114.065	-137.816
				95.2352	-140.115
				70.8636	-139.275
				43.6304	-134.99
				14.7003	-128.556
				-14.8532	-122.784
				-43.0632	-120.798
				-67.2763	-123.75
				-85.0676	-129.247
				-95.085	-132.124
				-97.3165	-126.794
				-92.8032	-109.602
				-83.3858	-80.5116
				-71.4148	-43.7268
				-58.9113	-6.71198
				-46.9238	22.8786
				-35.992	41.3321
				-26.9766	50.2969
				-20.9453	53.6988
				-18.2725	53.8348
				-18.2054	50.6456
				-19.4077	43.5955
				-20.8367	33.2178
				-22.0282	21.1763
				-22.5716	9.76216
				-21.6507	1.6317
				-18.6703	-0.298135
				-14.4624	6.17482
				-11.2772	20.2779
				-11.3322	37.1805
				-15.5154	50.3861
				-22.9969	55.5673
				-31.5677	52.3261
				-38.5134	43.3127
				-41.6964	32.1833
				-40.5265	21.7949
				-36.1481	13.355
				-30.1678	6.50924
				-23.0669	0.601715
				-14.0332	-3.41006
				-1.88368	-3.13638
				13.8228	1.97381
				31.9224	8.31906
				49.9119	10.3607
				65.1997	5.17818
				76.273	-5.14321
				83.3204	-15.2679
				87.8001	-20.6405
				90.9821	-19.6066
				93.0797	-11.9026
				93.7823	3.44059
				92.8613	27.485
				90.0377	58.8189
				84.7957	92.4177
				76.508	121.688
				64.8087	141.728
				50.1854	151.113
				34.3821	151.79
				20.1169	147.468
				9.85092	141.298
				4.2491	134.84
				1.99841	128.703
				1.13175	122.981
				0.112388	116.943
				-1.90849	108.79
				-5.05701	96.1036
				-9.05984	78.1616
				-13.9311	58.3755
				-20.053	42.4506
				-27.4254	33.6878
				-35.2441	31.1056
				-42.3494	31.6446
				-47.7749	33.2371
				-51.023	35.4638
				-52.2644	37.739
				-52.1029	38.3571
				-50.944	36.3629
				-48.8317	33.3776
				-45.8217	32.2951
				-42.2262	34.67
				-38.4544	39.4729
				-34.767	43.0305
				-31.434	40.7249
				-28.9197	30.8212
				-27.5529	16.589
				-27.1868	3.65393
				-27.1852	-4.55619
				-26.3141	-8.66004
				-22.8782	-11.2525
				-16.0085	-13.5859
				-6.87847	-14.8058
				2.07495	-14.2568
				8.89509	-13.2665
				12.9591	-13.8259
				14.8339	-15.9785
				15.6897	-17.213
				16.698	-14.7351
				18.58	-8.14302
				21.2996	0.476407
				23.9957	8.41164
				25.4146	13.3347
				24.6983	13.3235
				21.8427	7.55936
				17.524	-2.73861
				12.6961	-14.5999
				8.54824	-24.653
				6.77151	-30.3284
				9.31667	-29.9939
				17.3834	-22.4724
				30.4292	-7.45463
				46.0709	13.3388
				61.1568	36.1441
				73.2215	56.683
				81.08	71.7291
				84.3179	79.6786
				82.4502	80.5574
				74.7008	76.273
				60.6427	70.2756
				40.9091	65.5965
				17.3628	63.195
				-7.21981	62.2946
				-30.0685	61.3327
				-49.4942	58.7167
				-65.0061	54.1401
				-76.7147	49.7072
				-85.0569	48.9426
				-90.8571	53.7451
				-95.2071	62.042
				-98.8653	69.0993
				-101.466	71.6061
				-101.5	69.7406
				-97.4648	65.2414
				-89.1879	59.3678
				-78.1467	53.5146
				-66.5755	50.0164
				-55.9419	51.0241
				-46.0334	56.4682
				-35.578	62.7044
				-23.7118	64.0086
				-10.9166	57.0968
				1.26045	43.6692
				11.2334	28.0563
				18.1603	13.7334
				22.1213	2.00653
				23.8971	-7.43588
				24.6159	-15.1063
				25.2969	-20.7892
				26.4189	-24.2747
				27.7964	-26.694
				28.6755	-30.287
				28.1212	-36.5816
				25.6212	-45.039
				21.2841	-53.4663
				15.575	-59.6713
				9.11942	-63.1192
				2.77189	-65.4594
				-2.3327	-69.3952
				-5.01492	-76.8897
				-4.73357	-88.1401
				-2.30519	-101.235
				0.646483	-112.479
				3.37015	-118.413
				6.63704	-118.519
				11.6596	-115.674
				18.7113	-113.836
				26.6798	-115.454
				33.6527	-120.507
				37.9614	-127.15
				39.0115	-132.982
				37.2283	-135.729
				33.2032	-133.578
				27.1476	-126.319
				19.1682	-116.438
				9.80821	-108.02
				0.298806	-103.909
				-7.63842	-104.005
				-12.3876	-106.019
				-13.1609	-107.197
				-10.4292	-105.559
				-5.85532	-100.565
				-1.55763	-93.3761
				1.06676	-86.2078
				1.94937	-80.6562
				2.06519	-76.6496
				2.80932	-73.4445
				5.2984	-71.0894
				9.79008	-70.2727
				15.6826	-71.2328
				22.1578	-73.4286
				28.5198	-76.1042
				33.7881	-78.8083
				36.8159	-81.3199
				37.0926	-83.2347
				34.7534	-83.5548
				30.1089	-80.2937
				23.7759	-70.4616
				16.8606	-50.992
				10.6081	-20.3794
				5.762	19.7896
				2.2205	64.4484
				-0.467949	105.719
				-2.40354	134.515
				-3.44058	144.666
				-3.58112	136.748
				-2.76536	115.622
				-0.620442	84.7088
				2.83167	48.4686
				6.38589	18.9737
				8.73997	5.19886
				10.1519	-2.92675
				11.6582	-22.2972
				13.2957	-53.1401
				14.289	-79.1752
				13.9294	-83.2809
				11.4634	-58.5958
				6.39462	-13.8369
				-0.610625	27.7834
				-8.11664	42.0241
				-15.4496	21.5994
				-23.3361	-19.4359
				-32.7323	-58.3912
				-43.0971	-80.7317
				-52.2369	-86.8457
				-57.9174	-84.4842
				-59.2189	-76.458
				-56.3633	-57.5518
				-50.0967	-21.9163
				-41.7185	31.608
				-33.0383	103.075
				-25.7216	193.636
				-20.2575	294.192
				-15.0287	372.847
				-7.25769	391.211
				4.18615	339.547
				17.7114	244.291
				30.8619	145.621
				42.4931	75.2824
				53.2781	44.6389
				64.3112	46.8455
				75.4234	67.7083
				84.9773	90.663
				90.4746	100.784
				89.399	92.0582
				80.6528	66.8217
				65.2274	29.9662
				45.271	-11.5256
				23.0873	-47.464
				0.807616	-67.5763
				-20.0066	-65.7371
				-38.7282	-41.2266
				-55.4018	1.25236
				-70.2242	50.4796
				-83.2583	90.9212
				-94.3452	110.591
				-102.783	107.131
				-106.385	86.4918
				-101.282	58.208
				-84.1092	31.8729
				-54.9842	14.1399
				-18.1444	6.07678
				20.4968	3.30655
				56.5989	-0.141232
				88.7361	-6.9353
				117.333	-15.0967
				142.381	-20.9245
				161.464	-21.5157
				169.526	-15.1814
				160.677	-2.51577
				131.204	12.7694
				82.3174	25.8749
				20.4566	33.957
				-45.5857	37.16
				-108.178	37.2828
				-162.457	35.8888
				-206.132	33.7726
				-238.12	31.3893
				-256.983	29.1492
				-260.749	27.3709
				-248.171	25.48
				-220.47	21.5505
				-182.055	13.6864
				-138.736	1.40337
				-94.673	-14.5017
				-51.1671	-31.9861
				-8.55057	-47.2334
				31.0658	-55.2676
				63.498	-52.6997
				84.7295	-40.8432
				93.1491	-25.3132
				90.2078	-11.7933
				79.4769	-2.8824
				65.0083	1.34294
				49.8873	1.70567
				35.4073	-0.491058
				21.2959	-3.67331
				6.74765	-6.77976
				-8.51553	-9.58293
				-23.5765	-12.1655
				-36.6763	-14.5083
				-46.0893	-16.8065
				-49.765	-19.831
				-44.6226	-24.4197
				-27.7702	-30.5487
				0.933205	-37.2618
				37.4564	-43.4926
				74.8382	-48.6503
				106.149	-52.7361
				126.959	-56.1504
				136.151	-59.1046
				135.261	-61.4824
				127.299	-63.3017
				115.624	-64.4701
				102.927	-64.1547
				90.716	-61.2936
				79.6943	-55.9925
				70.6216	-50.3793
				64.7752	-47.6955
				63.4405	-49.7948
				66.7513	-55.6657
				72.7587	-62.8122
				77.6941	-69.426
				77.5644	-75.0829
				69.9744	-80.5587
				55.0527	-86.8895
				35.1007	-93.1818
				13.3713	-95.4101
				-7.01859	-88.4621
				-23.5473	-70.2281
				-34.5552	-44.2759
				-39.5049	-18.075
				-38.9315	1.77842
				-34.0627	12.3213
				-26.2918	13.7458
				-16.9384	8.5658
				-7.38971	1.3521
				1.17624	-2.76008
				8.32631	-1.23116
				14.1536	4.16221
				18.7207	9.60911
				22	12.8453
				23.968	14.1853
				24.2251	15.1917
				21.4859	16.8151
				13.8294	18.1765
				-0.259413	16.7821
				-20.4886	10.2646
				-43.7714	-1.26943
				-64.8795	-14.2442
				-78.3887	-23.3203
				-80.3667	-24.573
				-69.3503	-17.8456
				-46.8602	-6.81537
				-17.3564	3.61109
				12.6344	10.6744
				36.4963	15.1209
				50.0354	19.599
				52.4771	25.6819
				45.1628	32.5363
				30.0771	37.2686
				9.85237	35.4544
				-11.8565	23.2862
				-31.2083	1.05221
				-45.7586	-25.544
				-55.2738	-47.6202
				-61.2828	-56.5653
				-65.8435	-46.432
				-70.6568	-16.617
				-77.1881	25.7871
				-86.423	68.5696
				-97.5958	101.265
				-108.207	119.812
				-115.946	125.696
				-119.727	122.297
				-119.175	112.547
				-114.566	98.7929
				-107.542	83.4226
				-100.998	69.3742
				-97.3507	59.8348
				-96.7398	56.3507
				-97.3734	56.9168
				-97.6192	56.9589
				-97.3989	52.6694
				-97.5589	42.9906
				-98.2244	28.9024
				-97.988	12.0978
				-94.4325	-5.60195
				-85.1961	-22.4403
				-68.8841	-36.8776
				-45.473	-47.7875
				-15.9864	-54.5754
				18.3684	-57.1037
				56.6899	-55.711
				98.0885	-51.4391
				141.334	-45.7293
				184.75	-39.636
				225.95	-33.9634
				261.241	-30.0349
				285.447	-29.1562
				293.134	-30.7035
				280.892	-31.3074
				249.757	-27.2756
				206.378	-18.1943
				160.934	-7.28785
				122.25	1.46992
				94.2152	5.87902
				76.2226	5.96813
				65.7905	2.77666
				60.4305	-2.87114
				57.7351	-9.92775
				54.8431	-16.1287
				49.0025	-18.6223
				38.8248	-16.1224
				24.8655	-10.2534
				9.19467	-4.25744
				-5.89685	-0.659505
				-19.3062	-0.407517
				-31.467	-3.16427
				-43.6759	-7.82433
				-57.5056	-13.105
				-74.3032	-17.6983
				-94.1403	-20.4333
				-115.107	-20.8964
				-133.846	-19.3737
				-146.784	-16.2039
				-151.318	-11.6771
				-146.499	-6.06573
				-133.194	0.60549
				-113.903	8.32353
				-92.0784	16.1941
				-71.0591	22.0891
				-52.9888	23.9658
				-38.2544	21.8617
				-26.0074	18.2616
				-15.3315	16.34
				-5.87329	17.835
				2.25085	22.1497
				8.63508	27.2751
				12.9289	31.7451
				15.4389	35.3345
				17.3863	37.7156
				20.8013	37.1825
				27.848	31.2513
				39.3562	18.7867
				54.0182	2.02356
				69.173	-13.3457
				82.2793	-20.5529
				91.7814	-15.6549
				96.6598	-0.658451
				95.7379	17.5843
				88.1236	32.4838
				74.0541	41.3153
				55.1798	44.7621
				34.6998	45.2617
				16.7482	45.6741
				4.12548	48.138
				-3.5526	54.05
				-9.13204	64.524
				-15.9013	79.2722
				-26.1462	94.4584
				-40.731	102.731
				-59.4065	97.1143
				-80.8404	76.081
				-101.739	45.5368
				-116.085	15.9874
				-116.416	-3.55628
				-97.4352	-11.109
				-59.3955	-12.4554
				-8.65097	-15.8668
				44.2918	-25.1507
				87.6085	-37.5358
				111.674	-47.2531
				112.845	-50.1104
				95.0997	-45.9096
				67.5769	-38.3987
				39.311	-32.9284
				15.1839	-33.3246
				-4.30285	-40.2133
				-20.8505	-51.4283
				-36.4422	-63.6022
				-52.7201	-73.581
				-71.1251	-78.9445
				-92.6954	-78.4106
				-117.299	-72.7345
				-143.08	-64.7781
				-166.746	-57.7439
				-185.003	-53.0662
				-196.255	-50.2705
				-200.486	-48.6021
				-197.627	-47.7894
				-186.802	-47.309
				-167.059	-46.2003
				-138.615	-43.9391
				-103.518	-40.9279
				-65.1204	-37.9322
				-26.9669	-35.0929
				8.07194	-31.7144
				38.2899	-27.1111
				63.4005	-21.1922
				84.5499	-14.3516
				103.537	-7.61297
				121.376	-2.77954
				137.358	-1.73313
				149.218	-5.43179
				154.313	-13.2319
				151.093	-22.6679
				139.867	-30.4323
				122.589	-34.2513
				102.069	-33.7644
				80.933	-29.7172
				60.8189	-22.9173
				42.5539	-14.2245
				27.2658	-4.94808
				17.2877	3.27328
				15.8597	9.14437
				25.8248	12.5273
				48.0695	14.4925
				80.3122	16.4665
				116.85	19.4799
				149.795	23.6221
				171.621	27.7402
				177.713	30.1738
				167.546	29.705
				144.295	25.7005
				113.321	18.6471
				79.8018	11.3905
				46.7897	8.82937
				15.4037	14.8359
				-13.2603	28.7671
				-36.4608	45.4008
				-49.8999	58.5586
				-50.1842	64.6409
				-38.0017	63.6527
				-18.7058	58.2539
				0.327275	51.8424
				13.0647	46.646
				16.9316	42.8455
				13.0729	39.2597
				5.04457	35.0939
				-2.86973	31.0227
				-7.36978	28.4686
				-8.26427	28.3544
				-9.31707	30.6502
				-15.7965	34.2029
				-30.2693	36.6973
				-50.5094	35.5131
				-71.45	29.117
				-88.688	17.8534
				-99.9391	3.90145
				-104.399	-9.48594
				-101.966	-19.3492
				-93.2533	-24.0104
				-79.9324	-22.6438
				-64.3684	-14.5713
				-48.5866	-0.175107
				-33.8441	17.9127
				-21.3066	35.3406
				-12.7217	47.4924
				-9.77776	51.2222
				-12.9082	46.3365
				-21.2402	35.3639
				-33.2532	21.9824
				-47.2146	9.45595
				-62.1372	-0.347456
				-78.8492	-7.08549
				-98.9615	-11.6535
				-122.165	-15.7246
				-145.191	-20.6698
				-163.491	-26.6148
				-173.536	-32.8915
				-173.983	-38.784
				-165.304	-43.1736
				-148.232	-44.3084
				-122.969	-40.5891
				-90.6349	-31.7467
				-54.791	-19.7975
				-20.2158	-8.66726
				9.836	-2.15192
				34.9163	-1.65055
				56.5895	-5.71812
				76.8486	-12.1626
				96.7576	-20.0377
				115.739	-28.9474
				131.764	-37.6169
				142.586	-44.2759
				147.61	-47.9002
				148.731	-48.5917
				149.033	-46.9818
				151.006	-43.954
				156.011	-41.3983
				164.599	-41.8248
				176.418	-45.8174
				189.5	-50.8387
				200.274	-53.2363
				204.932	-50.6682
				200.962	-42.8568
				187.78	-31.1466
				166.742	-17.5021
				141.213	-3.48414
				116.246	9.83618
				97.0509	21.1302
				86.8072	28.5333
				84.8788	30.0502
				86.053	23.9765
				81.2133	9.98537
				59.9419	-8.26621
				15.1362	-22.0667
				-52.1315	-22.3284
				-130.615	-6.3715
				-201.621	20.6662
				-245.947	49.6028
				-252.228	71.3898
				-222.017	80.1919
				-168.085	75.6708
				-107.432	62.8601
				-54.2302	48.2835
				-16.9468	36
				0.156296	27.4556
				-5.16816	22.8412
				-32.61	21.9069
				-77.3659	24.7003
				-130.446	30.942
				-181.601	38.9263
				-222.461	46.8886
				-248.357	55.5714
				-258.448	67.8467
				-254.335	84.2187
				-238.642	98.6799
				-214.953	100.945
				-188.354	84.9547
				-164.488	55.312
				-146.525	23.6675
				-132.717	-0.752704
				-117.918	-15.5829
				-98.0488	-23.1058
				-72.5898	-26.8181
				-43.2644	-29.3027
				-11.8383	-31.5011
				20.7455	-33.2155
				53.8133	-34.0571
				86.0809	-33.9306
				115.873	-33.1338
				142.071	-32.2237
				164.793	-31.359
				185.786	-30.0678
				207.908	-27.8429
				233.188	-24.6211
				261.203	-21.549
				289.156	-21.8766
				312.879	-29.3249
				327.958	-43.9729
				330.905	-60.943
				320.187	-73.9782
				296.572	-79.0913
				262.222	-75.3875
				218.823	-64.6233
				166.16	-50.4351
				102.708	-37.0566
				28.3918	-27.4038
				-52.9103	-21.3846
				-133.777	-16.3145
				-205.688	-9.2632
				-260.886	0.941856
				-293.636	13.0107
				-302.436	23.642
				-291.672	29.2517
				-269.507	28.0523
				-243.344	20.6126
				-217.116	9.02022
				-191.494	-3.37155
				-165.159	-11.9029
				-136.228	-12.3257
				-103.916	-3.50222
				-69.0285	11.2207
				-32.8119	24.8893
				3.80041	30.4895
				39.7506	25.3731
				73.3111	12.2685
				102.083	-4.14573
				123.599	-20.6191
				136.502	-35.132
				141.524	-45.7359
				140.848	-51.242
				136.327	-52.0688
				128.76	-49.6487
				118.49	-44.847
				106.115	-36.9958
				92.7657	-25.1533
				79.5316	-10.4859
				66.6788	3.56919
				53.9981	14.3935
				41.5788	22.7852
				29.8421	31.8573
				19.1841	43.8585
				9.70723	57.5435
				1.13671	67.5517
				-7.10947	67.5525
				-15.63	55.8998
				-24.2204	37.3586
				-31.1414	18.8172
				-33.4058	4.95284
				-27.8107	-2.97985
				-12.5556	-6.72259
				11.1878	-9.52856
				39.5322	-14.0195
				67.5806	-20.2439
				90.7459	-25.3534
				105.411	-25.8196
				109.473	-20.2937
				102.952	-10.8469
				87.9141	-2.11018
				67.4244	1.32477
				45.0175	-2.09125
				25.0392	-9.77089
				11.9062	-17.2107
				7.40612	-21.6407
				8.35601	-23.3776
				7.63102	-24.0297
				-1.80357	-24.3432
				-23.2417	-23.867
				-55.1367	-21.6911
				-92.0889	-17.2516
				-126.894	-11.1086
				-153.072	-4.78055
				-167.216	0.831156
				-170.158	6.69247
				-165.856	14.8904
				-158.425	26.3467
				-149.824	38.984
				-139.826	48.6492
				-127.281	52.6885
				-111.41	52.4135
				-92.4568	51.507
				-71.3813	52.0197
				-49.2713	52.1756
				-27.137	48.3573
				-5.95158	38.9901
				13.365	26.3796
				30.099	15.4851
				43.7488	10.5536
				54.1163	11.6553
				61.7757	14.6982
				68.2082	15.3408
				75.3158	12.2463
				84.8953	6.77591
				98.1701	0.894936
				114.939	-4.18232
				132.557	-7.90476
				145.764	-9.83102
				147.872	-9.61299
				133.245	-7.37773
				100.192	-4.13984
				52.0467	-1.75758
				-4.6436	-1.85311
				-63.0076	-3.95625
				-117.733	-3.63951
				-165.339	7.94225
				-203.641	41.8601
				-231.301	106.364
				-247.236	197.221
				-250.021	286.862
				-238.451	330.666
				-213.511	298.302
				-179.6	198.901
				-142.977	71.3076
				-109.008	-42.3021
				-80.3831	-113.892
				-56.606	-137.786
				-35.2389	-129.418
				-14.4892	-111.564
				5.41009	-98.7362
				23.4428	-93.5198
				40.1445	-93.6034
				58.7911	-97.5925
				84.7976	-104.724
				123.496	-113.18
				176.647	-120.482
				239.965	-125.185
				304.205	-127.665
				358.57	-128.797
				393.686	-128.16
				403.497	-123.917
				385.632	-114.529
				340.661	-100.816
				272.374	-86.0094
				188.4	-73.2482
				98.2151	-63.2083
				9.57478	-54.2638
				-72.7956	-44.1473
				-145.589	-31.2041
				-204.949	-15.3067
				-246.105	1.56474
				-264.888	16.0772
				-259.985	25.3218
				-233.66	28.2273
				-190.28	25.8749
				-134.841	20.6311
				-72.8159	14.6783
				-10.03	9.0417
				48.2049	3.79229
				97.5429	-0.865393
				134.227	-3.94583
				154.751	-4.51184
				156.418	-2.80426
				139.138	-0.0372773
				106.835	2.7623
				66.2306	5.63206
				23.5759	9.45928
				-18.1953	15.0316
				-59.5022	22.5613
				-101.001	31.6848
				-140.413	41.3512
				-172.819	49.9791
				-194.044	56.0706
				-203.239	58.7203
				-202.204	57.8705
				-193.041	54.4378
				-176.532	49.7951
				-152.035	44.7558
				-118.805	39.2775
				-78.0773	33.0514
				-33.9961	26.1272
				7.92279	19.0452
				43.2907	12.471
				70.2939	6.68225
				89.4999	1.48556
				102.306	-3.19975
				109.079	-6.93915
				108.079	-9.03707
				96.232	-8.50147
				72.1398	-3.62643
				38.8443	7.29835
				3.5147	23.8524
				-25.299	42.018
				-40.9759	55.5358
				-41.4588	59.6182
				-29.8547	53.7646
				-12.8307	40.9702
				2.08805	24.3665
				9.33403	4.72059
				7.1809	-18.9221
				-2.48467	-45.1617
				-16.6457	-64.0914
				-33.9078	-52.8364
				-54.787	20.1482
				-78.7202	168.185
				-100.112	339.737
				-108.94	416.135
				-98.1934	304.202
				-70.2903	33.4956
				-34.7201	-264.283
				-0.816546	-461.939
				26.6324	-511.725
				47.2602	-442.924
				63.1799	-317.101
				76.9928	-186.976
				89.9138	-79.8698
				100.943	-2.16513
				107.805	49.5486
				108.497	80.6812
				102.101	96.0938
				88.7492	100.349
				69.343	97.6914
				45.6519	91.2409
				20.6129	82.9615
				-1.90836	74.5589
				-18.0241	67.6469
				-25.1552	62.8916
				-23.1219	59.7059
				-14.0443	56.8185
				-1.15755	52.8041
				12.5653	46.8702
				25.5391	40.0896
				38.1772	35.0955
				52.522	33.4753
				70.9944	33.7071
				94.8938	32.0956
				123.061	25.854
				151.233	15.3035
				172.673	3.2144
				180.494	-7.28507
				171.45	-14.0695
				148.549	-16.445
				119.694	-15.0517
				93.4923	-11.1078
				75.1454	-5.26411
				64.3832	2.5109
				56.9058	11.3109
				48.3186	17.5306
				36.8603	15.3305
				23.051	0.1012
				7.86563	-27.6499
				-8.56006	-61.4542
				-27.2559	-90.7955
				-49.9076	-103.951
				-77.3398	-92.1518
				-107.479	-54.6264
				-134.43	-0.994171
				-150.148	51.5872
				-148.556	85.3099
				-129.628	89.3205
				-100.131	64.1846
				-70.4501	20.8817
				-49.8993	-24.533
				-42.8406	-57.8236
				-46.9733	-72.2253
				-54.8477	-70.0415
				-57.9618	-59.4363
				-51.2924	-48.9374
				-36.0669	-43.2271
				-18.7962	-42.3257
				-6.85078	-43.6091
				-4.20393	-44.1753
				-10.7373	-42.0151
				-24.6916	-36.5625
				-44.4224	-29.0989
				-67.3671	-22.3781
				-88.8395	-19.0595
				-102.821	-19.5391
				-103.851	-21.1013
				-89.2665	-19.8282
				-61.0363	-13.6228
				-25.5885	-3.83511
				8.82502	5.25157
				35.7653	9.19623
				52.6958	7.29602
				60.0608	3.94139
				59.0163	5.01358
				50.6765	12.4679
				36.576	23.1624
				17.9608	32.8689
				-5.02179	40.0449
				-31.6875	45.7744
				-59.0094	51.5742
				-83.0685	57.6929
				-101.553	62.7816
				-113.554	64.8443
				-117.826	62.8373
				-112.412	57.5411
				-95.6968	50.8698
				-68.0029	44.6829
				-33.2941	40.3872
				0.644456	39.0028
				25.2419	40.967
				35.7875	45.713
				33.6295	51.1744
				24.1689	53.8325
				13.3638	50.3692
				6.44738	39.8942
				8.33487	24.4226
				22.1504	7.45756
				46.2718	-7.90417
				73.9974	-19.7492
				96.5281	-26.0719
				106.375	-23.2809
				98.8288	-7.1837
				71.2822	23.277
				22.6044	62.0533
				-45.8921	96.4613
				-129.079	113.532
				-217.311	107.151
				-296.791	80.1988
				-352.194	41.0319
				-371.453	-1.02172
				-350.031	-37.8794
				-292.296	-64.2497
				-209.82	-78.8887
				-117.765	-83.9072
				-30.2421	-83.125
				43.6097	-81.0053
				100.394	-80.9303
				140.48	-82.9959
				165.998	-84.3883
				179.576	-82.4298
				183.35	-76.9567
				178.921	-70.0139
				168.302	-63.8103
				154.468	-59.2696
				140.809	-56.1854
				130.129	-54.0126
				123.988	-52.3413
				122.724	-51.0469
				125.833	-50.0958
				132.194	-48.9068
				140.26	-46.116
				148.596	-40.2981
				156.102	-30.6962
				161.328	-17.3084
				161.79	-0.9157
				154.691	16.3569
				139.058	30.7927
				117.212	38.5214
				93.9724	37.87
				74.2827	30.4078
				60.8743	19.7011
				53.186	9.00161
				48.1089	0.157491
				41.8898	-5.77495
				32.1147	-7.92275
				19.359	-6.13409
				7.44659	-1.84612
				1.21623	2.19809
				3.37104	3.26431
				13.1404	-0.284948
				27.2064	-7.95884
				41.3601	-15.8846
				51.597	-17.7023
				54.6818	-8.82169
				48.9747	9.75681
				35.2823	31.7859
				16.7116	49.1571
				-2.3919	55.7349
				-18.0913	49.9523
				-28.7421	34.5308
				-35.502	14.1453
				-40.9171	-6.31359
				-47.2136	-22.3718
				-55.2941	-30.3591
				-64.3048	-27.9981
				-72.0948	-15.2122
				-76.6591	5.25526
				-77.255	28.2313
				-74.2748	48.083
				-68.6536	60.7946
				-61.6337	64.3684
				-54.6448	58.7187
				-48.8362	46.0307
				-44.6705	30.1437
				-42.5098	14.7851
				-44.0773	2.22803
				-53.0457	-6.84158
				-73.0164	-12.5576
				-103.428	-14.9622
				-136.612	-13.8214
				-159.576	-9.23478
				-160.59	-1.93255
				-136.173	6.89205
				-93.3724	15.2625
				-45.8284	20.2883
				-6.50806	19.5223
				18.4271	12.9037
				31.6875	3.0751
				42.0097	-6.56797
				58.0004	-13.9666
				82.7579	-18.4712
				113.039	-19.8175
				142.995	-17.72
				168.382	-12.1505
				187.415	-3.96249
				199.107	4.97459
				202.084	12.8354
				194.973	18.863
				177.79	23.2221
				152.586	26.3184
				122.257	28.268
				89.1347	28.7722
				54.9167	27.7339
				21.0696	25.6477
				-11.0043	22.723
				-39.9344	18.1187
				-65.0017	10.5431
				-87.1327	-0.406544
				-109.078	-13.3418
				-134.383	-25.5467
				-165.436	-34.4838
				-201.406	-39.188
				-237.116	-40.4884
				-264.095	-39.771
				-274.48	-37.6635
				-265.63	-33.9714
				-242.077	-28.5216
				-213.526	-21.8909
				-190.044	-15.3204
				-177.012	-10.0058
				-172.711	-6.60942
				-170.106	-5.30434
				-161.761	-5.80943
				-144.293	-7.16626
				-119.246	-7.7295
				-90.435	-5.61699
				-60.7927	0.459729
				-31.3318	10.028
				-2.26848	19.7736
				25.2818	24.0404
				48.8349	18.5875
				65.7037	5.22429
				74.335	-8.51476
				74.7566	-15.2456
				68.5809	-13.1465
				58.7098	-6.35221
				48.3878	-0.921985
				40.0486	-0.234976
				34.8955	-3.4387
				33.4409	-7.26654
				35.9555	-8.94404
				42.2103	-7.77584
				51.3074	-4.62372
				61.955	-0.84986
				72.7241	1.98183
				82.1157	2.60974
				88.804	1.13914
				92.3276	-0.771144
				93.4682	-0.915084
				93.5959	2.74476
				93.6931	12.0366
				94.203	27.7746
				95.6358	48.1804
				98.6435	68.6629
				103.191	83.498
				107.985	87.8841
				111.139	79.6223
				111.83	60.1623
				111.266	34.2867
				111.588	7.98894
				113.707	-14.5358
				116.116	-32.382
				115.601	-46.8346
				109.201	-59.2709
				95.9403	-69.7142
				76.9618	-76.728
				53.8515	-78.4835
				26.9177	-73.7092
				-4.73766	-61.9297
				-41.7093	-43.5359
				-82.6686	-19.774
				-123.564	7.15083
				-158.146	33.7004
				-180.078	55.1313
				-186.037	66.7551
				-177.26	66.2915
				-157.914	55.8056
				-132.219	40.724
				-102.793	26.2874
				-70.9975	14.8661
				-38.4998	6.13592
				-7.50453	-1.28703
				21.0624	-9.11146
				48.2579	-19.4651
				75.0274	-33.8235
				99.6196	-50.8115
				117.492	-65.0685
				124.389	-68.3579
				120.591	-52.8469
				112.921	-15.6734
				111.849	37.4141
				124.613	91.695
				149.214	128.138
				173.724	132.907
				181.497	105.749
				159.433	59.4652
				105.361	11.1684
				31.043	-26.6705
				-41.6939	-49.8012
				-90.8529	-60.3132
				-104.706	-62.5732
				-86.5427	-60.5071
				-51.1736	-56.7908
				-15.7196	-52.4971
				8.89317	-47.0958
				20.3712	-39.2633
				22.0447	-27.8054
				18.5483	-12.4058
				12.6381	5.43148
				3.97027	22.1043
				-9.51234	33.7723
				-28.5108	39.6666
				-50.3608	43.1396
				-69.586	48.044
				-80.0435	54.0118
				-77.7226	56.0172
				-63.7296	48.397
				-45.6875	29.3513
				-35.9353	2.57677
				-46.7635	-24.8973
				-84.092	-46.7809
				-142.841	-60.0234
				-207.653	-64.4152
				-258.696	-60.8839
				-279.129	-50.2141
				-261.168	-32.973
				-208.141	-10.5243
				-131.663	13.6208
				-46.8055	33.0203
				32.1267	39.6712
				94.9924	28.4252
				137.173	1.68066
				158.045	-30.4726
				159.283	-55.7107
				145.165	-66.3905
				122.996	-62.9011
				101.007	-51.2076
				84.0424	-37.0665
				70.5203	-23.019
				53.8241	-10.627
				26.9834	-2.39683
				-12.8555	0.443956
				-62.0593	-0.583834
				-111.182	-3.59977
				-148.814	-8.60395
				-166.425	-16.7579
				-161.402	-28.2988
				-137.173	-41.5944
				-101.049	-53.8456
				-61.284	-62.2272
				-24.7207	-64.9129
				4.6533	-61.9461
				26.0595	-55.2744
				40.8659	-47.8213
				50.9159	-42.3495
				57.6526	-40.117
				62.1239	-39.8002
				65.174	-38.5279
				67.7151	-34.5919
				70.7912	-28.6713
				74.9083	-22.391
				79.2675	-16.428
				82.0131	-10.1098
				81.3357	-2.16168
				76.5165	8.38131
				68.2918	21.5241
				58.3448	35.9269
				48.5435	49.1588
				40.3865	58.9288
				34.3934	64.2325
				29.9712	65.4404
				26.0609	63.7519
				21.5271	60.5481
				15.1702	56.9212
				6.39508	53.5007
				-3.3502	50.5473
				-9.65831	48.2173
				-6.21894	46.6261
				12.2456	45.8339
				46.9605	46.0294
				93.714	47.2948
				143.873	48.7438
				187.714	48.084
				218.391	42.4443
				233.695	30.1595
				234.422	12.9295
				221.896	-1.53713
				197.747	2.77489
				164.551	49.0369
				125.132	157.079
				82.6096	313.877
				41.5537	442.667
				5.13657	434.535
				-30.9472	247.32
				-77.9858	-41.5789
				-145	-297.346
				-230.284	-427.416
				-320.526	-422.698
				-396.247	-332.195
				-439.471	-216.316
				-440.12	-115.889
				-398.677	-45.884
				-324.645	-4.22994
				-232.771	17.4341
				-138.711	27.6326
				-54.854	33.0294
				12.1264	38.1115
				61.0678	44.9207
				94.2595	53.0611
				114.569	61.5016
				123.071	70.6921
				118.72	81.6784
				99.5905	93.2944
				63.5444	101.922
				8.64255	104.486
				-64.6137	100.405
				-149.735	90.477
				-232.18	75.6327
				-291.719	57.663
				-310.637	39.9877
				-283.637	26.1933
				-221.128	17.784
				-142.913	13.7841
				-68.096	11.9267
				-8.2759	9.81739
				33.7253	5.60313
				61.1766	-1.67332
				79.5563	-11.8019
				93.9387	-23.3149
				108.288	-34.1693
				125.534	-42.9273
				147.173	-49.2364
				172.083	-53.5246
				195.679	-56.4946
				211.082	-58.4793
				212.168	-59.0275
				196.399	-57.3866
				165.815	-53.6358
				125.946	-48.9796
				83.366	-44.6967
				43.2542	-41.3395
				8.21991	-38.9277
				-21.008	-37.1688
				-43.611	-35.5287
				-57.5955	-33.5331
				-61.0023	-30.8233
				-53.8314	-27.0438
				-38.2221	-22.2506
				-17.2419	-17.3489
				5.95119	-13.7102
				28.3772	-12.3261
				47.4396	-13.66
				61.5027	-18.1531
				70.8369	-26.0428
				77.7781	-36.3622
				85.2884	-46.543
				94.9261	-53.4902
				105.621	-55.2281
				113.799	-51.7133
				115.085	-44.487
				106.375	-35.5984
				86.6103	-26.6668
				57.233	-18.7908
				23.1991	-12.8493
				-7.57488	-9.53455
				-27.5013	-9.27802
				-32.8795	-12.2213
				-24.9418	-18.1695
				-8.4077	-26.8715
				10.9649	-38.1909
				28.3918	-50.8749
				40.6338	-60.8995
				45.8314	-62.5844
				43.7102	-52.8561
				35.7419	-34.4235
				24.5035	-14.0572
				12.2958	2.21129
				0.120653	11.945
				-11.5896	15.7713
				-21.1402	15.6111
				-25.2757	13.1193
				-21.2678	9.14721
				-9.24875	4.36068
				7.7086	-0.498521
				26.0361	-5.26959
				43.6471	-10.4535
				58.9558	-16.2167
				69.3187	-21.4964
				72.0577	-23.9652
				66.7187	-20.9226
				55.5661	-10.5513
				41.6997	7.41831
				26.417	31.4482
				8.12944	58.1687
				-16.3933	83.4774
				-49.8545	103.846
				-92.5348	116.354
				-141.109	119.038
				-189.114	112.409
				-229.493	99.784
				-257.554	85.4295
				-271.982	72.0693
				-273.773	59.486
				-265.071	45.6402
				-248.515	29.5427
				-226.647	12.492
				-201.607	-3.0154
				-175.164	-14.2054
				-148.908	-18.5905
				-124.596	-15.2785
				-103.95	-5.66197
				-87.5476	7.63575
				-73.7472	22.0984
				-59.091	35.6054
				-40.1652	46.0497
				-15.2169	51.2392
				15.7969	49.6362
				51.9172	41.3554
				90.7712	28.1353
				127.419	12.0547
				154.885	-5.35304
				167.447	-22.4555
				165	-37.152
				154.931	-48.0728
				149.503	-55.3276
				160.321	-59.6667
				193.029	-61.6983
				244.546	-61.8606
				303.111	-60.3415
				350.477	-57.0742
				366.699	-52.1113
				337.631	-45.7429
				262.441	-38.3414
				156.582	-30.4278
				46.5625	-22.8108
				-42.1296	-16.5689
				-95.8521	-12.7373
				-114.83	-11.6886
				-107.748	-12.9044
				-85.8676	-15.3306
				-59.9191	-17.41
				-38.1615	-17.1465
				-24.7643	-13.2591
				-19.5166	-6.32152
				-19.0788	1.61748
				-19.3149	8.32999
				-17.9409	12.5378
				-16.1031	14.401
				-17.7048	14.6817
				-26.9463	13.2803
				-46.2176	9.73746
				-75.6597	5.71333
				-113.293	5.5915
				-154.427	13.2014
				-191.018	27.8759
				-212.743	44.1548
				-210.319	55.4305
				-179.324	58.0935
				-122.211	52.9223
				-47.6103	43.6596
				32.4235	35.0271
				105.497	31.2546
				161.053	34.3803
				191.773	42.7049
				194.435	51.237
				170.191	54.3803
				124.316	49.2174
				65.292	37.2826
				3.14179	23.0283
				-52.6379	10.1162
				-94.9716	-0.569576
				-120.494	-9.56148
				-130.395	-16.657
				-130.484	-20.8283
				-129.14	-21.6178
				-133.39	-19.7817
				-145.676	-16.8029
				-163.308	-14.3951
				-180.267	-14.6183
				-189.513	-19.7289
				-184.993	-30.7787
				-163.75	-45.8528
				-127.662	-59.2513
				-83.5022	-62.3051
				-40.5969	-46.8886
				-6.77944	-10.8703
				14.9122	38.5539
				27.045	86.7972
				36.5688	118.27
				52.0465	124.123
				79.2628	106.815
				116.899	77.4462
				155.591	47.6635
				182.174	23.3948
				186.904	4.75646
				168.803	-10.2578
				135.72	-22.8838
				99.3293	-33.2024
				68.8778	-41.2112
				47.9427	-47.6599
				35.0556	-53.518
				26.5845	-58.8044
				19.8375	-62.7053
				14.5093	-64.7352
				11.8706	-64.9058
				12.7388	-63.1837
				16.3022	-59.7945
				20.9366	-55.5883
				25.6033	-51.3656
				30.2114	-47.1683
				35.1283	-42.6657
				40.605	-37.962
				46.4767	-33.5537
				52.061	-29.6146
				56.268	-25.5626
				58.1216	-20.3376
				57.2277	-13.2651
				53.7589	-4.69893
				48.1913	4.05155
				40.9639	11.1906
				32.3872	15.1637
				22.9735	15.4849
				13.7552	13.1306
				6.25832	9.96352
				2.12281	7.23275
				2.63624	4.62567
				8.49243	1.19507
				19.9347	-3.34405
				36.9648	-9.09678
				58.5804	-17.1162
				81.4029	-28.3148
				100.082	-40.4848
				110.034	-47.8399
				109.861	-45.2196
				101.281	-32.628
				87.0644	-15.2009
				68.8274	0.686574
				46.2704	10.9403
				18.3912	14.8066
				-14.3616	14.3472
				-49.0655	12.935
				-81.4916	13.1113
				-108.368	15.2213
				-128.624	17.9379
				-142.547	20.072
				-150.34	21.7155
				-152.017	23.6149
				-147.988	25.8889
				-138.977	27.6475
				-125.693	27.7607
				-109.443	25.8865
				-93.2267	22.8881
				-81.2852	20.22
				-76.724	18.6651
				-79.7016	17.9455
				-87.8501	17.6063
				-97.6709	17.5356
				-105.48	17.6414
				-108.145	17.8933
				-103.792	18.6014
				-92.0099	19.8399
				-73.4055	20.7559
				-48.8401	20.0373
				-19.1473	16.9304
				14.2214	11.8005
				48.5758	6.06478
				80.5419	1.50324
				107.618	-0.68657
				129.629	-0.580762
				148.695	0.346987
				167.156	0.122488
				184.997	-2.12436
				199.327	-5.50642
				206.379	-8.55632
				203.897	-10.6415
				192.187	-11.824
				173.732	-11.8012
				151.905	-9.83967
				130.513	-6.10928
				114.185	-2.51234
				106.56	-1.35735
				106.148	-3.26837
				104.932	-6.62244
				92.4068	-8.49973
				61.1976	-6.45903
				9.46267	-0.348269
				-59.3488	7.81738
				-136.932	15.817
				-211.763	22.4953
				-273.056	27.5236
				-314.667	30.6992
				-336.116	31.4765
				-340.558	28.7879
				-332.161	21.8572
				-315.138	12.3937
				-294.07	4.73958
				-273.471	1.36489
				-255.92	-0.85534
				-241.098	-7.90881
				-227.357	-22.3299
				-213.643	-39.7403
				-199.498	-51.2363
				-184.021	-49.4052
				-165.381	-33.0524
				-141.371	-7.71792
				-110.509	17.0851
				-72.2832	32.1286
				-26.4115	32.756
				27.0461	20.3276
				86.3227	-0.143729
				147.027	-22.6305
				202.807	-40.4687
				247.331	-47.0278
				276.113	-39.1436
				286.795	-20.3774
				278.33	0.447506
				250.388	15.0647
				203.925	20.5718
				143.03	19.2502
				76.6485	15.3135
				17.4205	12.3984
				-22.9658	12.5645
				-38.2138	15.8112
				-28.0431	19.9908
				3.9738	21.9576
				52.346	19.6762
				110.572	13.3659
				171.754	5.06793
				229.415	-2.43365
				278.995	-6.97992
				319.856	-8.2225
				355.727	-7.58212
				392.087	-7.03626
				431.812	-8.11133
				471.789	-11.5983
				503.046	-17.3073
				514.181	-23.9749
				494.695	-29.7252
				437.383	-32.5442
				341.711	-30.7727
				216.352	-24.0315
				76.3526	-13.8129
				-64.0516	-2.80975
				-196.206	6.66191
				-315.849	13.7258
				-418.91	18.7188
				-498.558	22.4191
				-545.582	25.3586
				-552.179	27.3599
				-517.787	27.8422
				-453.665	26.7882
				-381.905	25.3299
				-327.371	25.2515
				-306.259	27.4061
				-318.699	30.5611
				-350.57	32.4242
				-381.67	31.5987
				-393.581	28.1575
				-374.743	22.8538
				-322.701	16.2975
				-243.154	8.95684
				-147.021	1.599
				-47.4024	-4.89512
				43.1482	-10.2137
				115.102	-14.8828
				163.876	-19.9024
				190.612	-25.9439
				201.256	-32.571
				203.741	-38.3822
				204.402	-42.1516
				205.552	-43.6214
				205.176	-43.2167
				199.089	-41.5806
				184.53	-39.4809
				162.328	-37.5451
				136.094	-35.7819
				109.799	-33.6602
				85.5549	-30.7372
				62.3718	-26.8015
				36.8173	-21.4397
				5.58534	-14.191
				-32.1809	-5.49306
				-74.065	2.8768
				-114.387	8.74789
				-145.622	11.0918
				-161.527	10.6684
				-159.711	9.22016
				-142.113	7.81466
				-114.066	5.63525
				-82.5537	0.514703
				-54.0384	-8.47745
				-31.9508	-18.2551
				-14.5123	-22.4448
				4.97684	-16.604
				34.4722	-3.03104
				77.8598	10.4019
				131.022	16.4971
				182.934	13.7508
				222.541	5.91737
				246.155	-2.11484
				258.532	-7.67229
				267.013	-10.5696
				274.82	-11.5717
				279.076	-11.2814
				274.08	-9.86816
				256.411	-7.18722
				227.263	-3.27117
				191.298	1.38943
				155.099	6.05009
				125.647	9.67428
				107.306	11.1569
				98.9352	10.3718
				94.3061	8.54509
				85.839	7.36716
				68.404	7.99705
				41.0481	10.4193
				6.72416	13.4842
				-29.4598	16.0328
				-62.1043	18.0471
				-85.8559	20.2441
				-95.0863	22.5902
				-85.2204	23.7638
				-55.8117	22.0247
				-13.1766	16.6542
				29.5582	9.04005
				55.4875	2.10489
				49.5564	-1.42337
				5.46223	0.0836309
				-69.3965	6.97996
				-153.775	17.7632
				-219.337	28.8626
				-244.33	36.2411
				-226.349	37.9486
				-183.205	34.9011
				-140.809	29.3481
				-118.901	23.6101
				-125.055	20.1853
				-156.78	21.4715
				-206.172	28.4485
				-263.73	39.6212
				-320.165	51.208
				-366.641	58.8541
				-395.204	59.9485
				-400.434	54.3778
				-381.395	43.3148
				-341.582	28.1844
				-285.616	11.0176
				-215.362	-5.10564
				-129.621	-16.9395
				-29.085	-22.8342
				77.1334	-23.7488
				170.582	-22.3232
				229.881	-20.7808
				239.161	-19.6581
				194.905	-18.1022
				109.946	-15.2256
				10.7618	-11.4184
				-74.1536	-8.17732
				-128.11	-6.66233
				-151.066	-6.72863
				-152.817	-7.11365
				-142.825	-6.44854
				-125.225	-4.61636
				-99.7171	-3.15392
				-64.6814	-3.80085
				-20.1632	-6.51327
				30.4706	-8.99387
				81.1057	-8.08758
				125.397	-1.96835
				159.812	7.22045
				184.956	11.9864
				203.645	4.10691
				217.591	-16.9958
				226.069	-43.0697
				227.381	-64.6771
				220.911	-77.4651
				207.358	-82.0393
				188.427	-80.7995
				168.66	-75.4963
				156.731	-67.1693
				160.831	-57.6526
				180.366	-50.0152
				202.513	-47.0199
				207.445	-49.1521
				179.12	-53.8248
				116.214	-56.5189
				36.8346	-53.3441
				-28.2418	-43.2009
				-53.1738	-28.2088
				-34.3288	-12.4167
				7.7795	0.3084
				43.948	7.99771
				54.9479	11.0893
				39.0689	11.8013
				7.10151	12.8352
				-27.1679	15.7914
				-53.811	20.1805
				-69.1262	23.9584
				-74.727	25.3549
				-75.0604	24.5491
				-74.5226	23.4401
				-75.1062	23.5431
				-75.7381	24.3988
				-73.2014	24.1021
				-63.3374	20.997
				-42.3817	15.0192
				-8.755	7.73084
				35.661	0.913224
				85.7089	-4.62728
				134.239	-8.68817
				173.433	-10.7731
				196.142	-9.9803
				198.766	-5.91013
				184.704	0.0663008
				163.953	4.84587
				147.483	5.78682
				140.363	3.16131
				137.714	0.109566
				125.962	0.178316
				90.5285	5.17171
				26.328	14.8946
				-57.2041	27.8154
				-140.864	41.4641
				-205.36	52.882
				-238.198	59.5655
				-234.843	60.2464
				-196.824	54.8746
				-130.289	44.1685
				-45.4082	29.4998
				44.3821	13.0957
				123.849	-2.33614
				178.964	-14.6449
				200.818	-22.7647
				188.072	-26.3441
				147.092	-25.4062
				89.9101	-20.6313
				29.6766	-13.6509
				-24.028	-6.37153
				-67.009	0.168298
				-99.9425	6.05901
				-126.767	12.0353
				-152.269	18.9896
				-179.858	27.6194
				-210.692	38.1351
				-244.279	49.8183
				-279.841	60.681
				-316.595	67.9631
				-351.229	69.3694
				-375.817	63.7339
				-380.987	50.7435
				-361.989	31.6127
				-321.19	10.8601
				-265.269	-4.25574
				-200.937	-7.84675
				-133.271	0.668973
				-66.7488	16.3653
				-6.15994	31.8901
				44.099	41.1291
[truncated: 1,489 more rows]

## Sheet: Participant 03
MTP_moment	Plantar_Aponuerosis_Length	MTP_angle	Time	AbductorHallucis	FlexorDigitorumBrevis
NaN	NaN	-34.0274	0	-71.7387	20.0445
NaN	NaN	-33.5955	0.007	-57.3255	28.9661
NaN	NaN	-33.0473	0.014	-35.0494	39.5556
NaN	NaN	-32.4037	0.021	-6.33061	50.7666
NaN	NaN	-31.6876	0.028	25.1637	60.7259
NaN	NaN	-30.8902	0.035	54.5526	66.7456
NaN	NaN	-29.9179	0.042	77.1078	66.0836
NaN	NaN	-28.7554	0.049	89.8071	57.8051
NaN	NaN	-27.4018	0.056	92.6382	44.2432
NaN	NaN	-25.9292	0.063	88.6485	29.8421
NaN	NaN	-24.4206	0.07	82.1909	18.2626
NaN	NaN	-22.9785	0.077	76.5561	10.939
NaN	NaN	-21.6685	0.084	72.8226	7.75054
NaN	NaN	-20.5655	0.091	70.2874	7.78205
NaN	NaN	-19.7036	0.098	67.8163	9.29159
NaN	NaN	-19.0608	0.105	65.1693	10.0262
NaN	NaN	-18.651	0.112	63.1482	8.51101
NaN	NaN	-18.388	0.119	62.6945	5.10883
NaN	NaN	-18.2408	0.126	64.2759	1.70019
NaN	NaN	-18.1668	0.133	67.8672	0.349305
NaN	NaN	-18.1303	0.14	72.9118	1.90111
NaN	NaN	-18.1165	0.147	78.308	5.47709
NaN	NaN	-18.1084	0.154	82.7305	9.47743
NaN	NaN	-18.0975	0.161	85.1286	13.1382
NaN	NaN	-18.0808	0.168	85.0299	16.9824
NaN	NaN	-18.0625	0.175	82.4325	21.8841
NaN	NaN	-18.0473	0.182	77.6086	27.7894
NaN	NaN	-18.0331	0.189	71.113	33.3287
NaN	NaN	-18.0143	0.196	63.666	36.7692
NaN	NaN	-17.9833	0.203	55.7968	37.3046
NaN	NaN	-17.9327	0.21	47.7923	35.3913
NaN	NaN	-17.8349	0.217	40.141	32.1527
NaN	NaN	-17.6853	0.224	33.509	28.5253
NaN	NaN	-17.4506	0.231	27.8219	24.6214
NaN	NaN	-17.1328	0.238	22.0048	19.9314
NaN	NaN	-16.7622	0.245	15.1264	14.2384
NaN	NaN	-16.3751	0.252	7.28012	7.75922
NaN	NaN	-16.0129	0.259	-0.767314	0.121666
NaN	NaN	-15.7095	0.266	-8.13575	-9.91193
NaN	NaN	-15.4932	0.273	-13.8329	-23.0923
NaN	NaN	-15.3772	0.28	-16.8224	-38.5025
NaN	NaN	-15.4058	0.287	-16.776	-53.8828
NaN	NaN	-15.5629	0.294	-14.715	-66.8942
NaN	NaN	-15.8585	0.301	-12.5003	-76.4452
NaN	NaN	-16.2699	0.308	-11.7101	-83.2256
NaN	NaN	-16.7474	0.315	-13.0524	-88.7501
NaN	NaN	-17.2372	0.322	-16.4133	-93.669
NaN	NaN	-17.676	0.329	-21.1415	-96.8878
NaN	NaN	-17.9829	0.336	-26.4489	-95.7516
NaN	0.173004	-18.0731	0.343	-31.838	-87.1301
NaN	0.172945	-17.9363	0.35	-37.2723	-69.6475
NaN	0.172798	-17.615	0.357	-42.9054	-45.5079
NaN	0.172599	-17.3013	0.364	-48.8153	-19.8086
NaN	0.172369	-17.1177	0.371	-55.0612	2.00152
NaN	0.172139	-17.0807	0.378	-61.354	16.4948
NaN	0.171938	-17.1548	0.385	-66.3869	23.3932
NaN	0.171811	-17.3442	0.392	-68.1946	25.1382
NaN	0.171765	-17.5954	0.399	-65.5811	25.1987
NaN	0.171795	-17.8527	0.406	-58.9706	26.1973
NaN	0.171882	-18.0739	0.413	-49.8972	29.0804
NaN	0.172005	-18.2683	0.42	-39.9714	33.4864
NaN	0.172153	-18.4594	0.427	-30.3055	38.2764
NaN	0.172308	-18.665	0.434	-21.4889	41.6628
NaN	0.172451	-18.8937	0.441	-13.7884	41.455
NaN	0.172563	-19.1432	0.448	-7.38697	35.7104
NaN	0.172636	-19.4086	0.455	-2.40639	23.4678
NaN	0.172674	-19.6937	0.462	1.34982	5.3261
NaN	0.172729	-20.0005	0.469	4.52251	-16.3167
NaN	0.172775	-20.3406	0.476	7.94415	-37.8248
NaN	0.172814	-20.7206	0.483	12.1676	-55.784
3.97643	0.172818	-21.1376	0.49	17.0172	-68.4836
3.52471	0.172819	-21.6069	0.497	21.4972	-76.4623
3.03297	0.17283	-22.1358	0.504	24.1919	-81.9102
2.55037	0.172843	-22.7543	0.511	23.9142	-87.2114
2.05532	0.172845	-23.4733	0.518	20.3883	-93.3311
1.51533	0.172825	-24.2662	0.525	14.499	-99.1767
1.05032	0.17277	-25.0979	0.532	7.64547	-102.682
0.628516	0.172677	-25.9265	0.539	0.858585	-102.677
0.192125	0.172536	-26.7459	0.546	-5.41031	-99.5698
-0.259176	0.172341	-27.5707	0.553	-11.0909	-94.5821
-0.740595	0.172094	-28.4194	0.56	-16.4894	-89.0851
-1.18764	0.171785	-29.3286	0.567	-22.3052	-84.4945
-1.57359	0.171433	-30.3348	0.574	-29.227	-81.8129
-1.95129	0.171054	-31.5239	0.581	-37.3498	-80.6001
-2.33957	0.170676	-32.9655	0.588	-46.0368	-78.3398
-2.64115	0.170318	-34.6675	0.595	-54.262	-71.3209
-2.84774	0.170003	-36.6996	0.602	-60.9975	-57.0649
-3.11635	0.169733	-39.0033	0.609	-65.362	-36.479
-3.36111	0.169564	-41.5803	0.616	-66.6037	-13.4246
-3.56255	0.169467	-44.3239	0.623	-64.2305	7.9991
-3.66456	0.169396	-47.0359	0.63	-58.2847	25.4567
-3.59362	0.169287	-49.3678	0.637	-49.4616	38.2171
-3.34098	0.169097	-51.0727	0.644	-39.1882	46.4842
-2.91318	0.168782	-51.7834	0.651	-29.6194	51.4659
-2.32965	0.168326	-51.3199	0.658	-22.749	55.4959
-1.79833	0.167764	-49.8389	0.665	-18.9409	61.5215
-1.26855	0.167162	-47.4779	0.672	-16.7841	71.989
-0.832255	0.166625	-44.8267	0.679	-14.5381	87.7179
-0.450878	0.166238	-42.2719	0.686	-11.1816	107.67
-0.0907323	0.16601	-40.1048	0.693	-6.28336	129.414
0.0800752	0.165868	-38.3955	0.7	0.22745	149.512
				7.9465	164.445
				15.9679	172.374
				23.0621	173.991
				28.1101	171.131
				30.6168	164.563
				30.5394	153.494
				27.5799	136.934
				21.2121	114.763
				11.6007	87.8416
				0.332578	57.8451
				-9.63852	26.7962
				-15.0547	-3.48316
				-14.1953	-31.1698
				-7.84994	-53.9856
				1.59568	-69.836
				11.5787	-78.2144
				20.1361	-80.5813
				26.4286	-79.2017
				30.9474	-75.8114
				34.8613	-71.281
				38.9822	-66.0486
				43.4064	-60.4864
				48.0072	-54.8375
				53.0363	-48.8237
				59.2771	-41.0929
				67.8016	-29.2738
				79.4775	-11.4845
				94.0509	11.6697
				108.907	36.3115
				118.904	55.8614
				118.805	63.1564
				106.991	54.5669
				86.7927	33.1015
				64.2061	6.49994
				44.2885	-17.8176
				28.872	-35.8648
				16.7867	-47.1745
				5.84236	-53.7163
				-5.41	-58.5036
				-17.1563	-64.0885
				-28.7649	-71.4974
				-39.4738	-79.9465
				-48.7295	-87.4196
				-56.3358	-92.0839
				-62.8627	-93.789
				-70.1104	-94.4833
				-80.7548	-97.2733
				-96.7873	-104.901
				-117.884	-118.393
				-141.079	-136.184
				-161.725	-154.122
				-175.358	-166.797
				-179.892	-169.881
				-176.321	-162.313
				-167.277	-146.872
				-155.537	-128.645
				-143.654	-112.593
				-133.628	-101.704
				-125.896	-96.0804
				-118.664	-93.2678
				-108.977	-90.1127
				-95.0945	-84.8019
				-78.1027	-77.424
				-61.3606	-69.2153
				-48.2528	-61.1575
				-39.8487	-52.6759
				-33.847	-41.9235
				-25.0767	-27.0074
				-6.93789	-5.63011
				26.9305	25.9623
				80.8296	71.6484
				154.873	132.59
				243.728	206.247
				337.608	287.043
				424.357	366.276
				490.893	431.976
				524.441	470.683
				514.707	470.664
				457.425	425.859
				359.041	340.596
				238.924	232.101
				123.696	125.549
				35.305	42.4823
				-17.5642	-8.23752
				-38.9097	-29.9774
				-39.4029	-31.5347
				-31.0308	-21.5837
				-24.0718	-7.27118
				-25.1383	5.62
				-35.6	13.5248
				-51.1859	16.3542
				-63.9912	17.5078
				-66.4558	22.1856
				-54.7779	34.5956
				-29.9889	55.5179
				2.64643	81.5674
				34.7443	106.113
				56.8221	121.539
				62.1671	122.866
				50.7334	110.966
				29.0658	92.2786
				5.78044	74.6693
				-13.2514	62.6425
				-26.7079	55.785
				-36.8482	51.3504
				-47.3379	47.4525
				-61.148	43.1308
				-79.7799	36.7174
				-104.22	25.8532
				-135.954	8.7197
				-176.049	-15.12
				-222.976	-43.8953
				-271.56	-73.3411
				-313.849	-98.3068
				-341.431	-114.968
				-348.507	-121.54
				-334.025	-118.005
				-301.763	-106.128
				-258.838	-89.3603
				-213.305	-71.8589
				-171.588	-57.057
				-137.036	-46.882
				-110.148	-41.7754
				-89.7241	-40.8299
				-73.9686	-42.0818
				-61.1244	-43.4872
				-49.5886	-43.9149
				-38.0378	-43.1136
				-25.9145	-41.1882
				-13.4042	-38.5887
				-0.45751	-36.2041
				13.6276	-34.8093
				29.187	-34.4643
				45.5026	-34.7288
				61.5201	-35.0543
				76.5244	-34.7783
				90.0377	-33.4294
				101.674	-31.2783
				111.106	-29.2133
				118.113	-28.1452
				122.827	-28.6774
				125.813	-30.9171
				127.791	-34.238
				129.314	-37.2776
				130.706	-38.0341
				132.343	-34.2393
				134.992	-24.8991
				139.622	-11.6119
				146.622	2.73846
				155.077	16.0245
				162.666	26.7244
				166.171	33.238
				162.506	34.7231
				150.159	32.0042
				129.931	27.0682
				104.264	21.7378
				76.288	16.6714
				49.2835	11.3879
				25.9227	5.22409
				7.5107	-1.70251
				-5.92172	-8.53114
				-14.8857	-14.5695
				-19.7687	-19.8173
				-20.6652	-24.5416
				-17.844	-28.712
				-12.4209	-31.9659
				-6.59238	-34.0178
				-3.11283	-35.1833
				-4.20809	-36.4041
				-10.596	-38.5105
				-21.1098	-41.6081
				-33.14	-45.3219
				-43.823	-49.518
				-50.9265	-54.8583
				-52.8282	-62.6998
				-48.6478	-74.294
				-38.925	-89.714
				-25.6552	-107.021
				-11.309	-122.428
				2.04052	-131.815
				12.8399	-132.611
				20.043	-124.889
				23.3692	-111.255
				23.3777	-95.3959
				21.079	-79.7922
				17.4099	-64.6721
				12.9299	-49.7639
				7.78437	-36.4804
				1.84485	-27.1303
				-4.94318	-22.6135
				-12.0571	-21.9132
				-18.3784	-23.1708
				-23.0287	-24.7707
				-26.0781	-25.8569
				-28.3691	-26.0477
				-31.0364	-24.9169
				-34.9922	-22.0324
				-40.163	-17.3247
				-45.0918	-11.3281
				-47.8916	-5.05112
				-48.2444	0.586825
				-48.5063	5.24196
				-52.5477	9.15235
				-63.2364	12.9022
				-80.4159	17.2767
				-100.563	23.1863
				-118.295	31.2615
				-128.65	41.0508
				-128.622	50.4543
				-117.214	55.8658
				-94.3553	53.0239
				-60.2101	38.4596
				-16.1974	11.2225
				33.6959	-25.1912
				83.5221	-61.4216
				127.203	-83.9052
				159.618	-80.4002
				177.064	-46.0049
				178.389	13.9708
				166.553	85.8698
				148.846	153.541
				134.719	204.423
				132.102	232.368
				144.249	237.418
				168.95	224.201
				200.383	199.445
				231.913	168.918
				257.823	135.656
				273.668	101.165
				276.055	67.6658
				262.698	38.316
				232.947	15.8348
				188.22	1.37834
				131.615	-5.83572
				66.6469	-7.9372
				-4.19841	-7.07085
				-80.0594	-4.52379
				-160.976	-0.833873
				-246.172	3.7598
				-332.492	9.05687
				-414.361	14.9919
				-484.987	21.8415
				-537.46	29.8359
				-565.476	38.2605
				-564.268	45.2424
				-531.927	48.829
				-470.862	48.384
				-388.36	44.8583
				-294.958	39.8079
				-201.29	34.4526
				-115.555	29.7554
				-42.692	26.9028
				15.1552	26.8272
				57.924	28.9716
				87.387	31.2295
				106.941	31.6499
				121.114	29.9246
				135.081	27.1645
				153.892	24.754
				181.276	23.2969
				218.563	21.8753
				263.971	18.3281
				312.391	10.8915
				356.095	-0.219769
				386.456	-12.4829
				395.684	-21.9935
				377.271	-25.8348
				326.067	-24.4182
				240.565	-20.8661
				127.166	-18.2777
				2.1796	-18.214
				-112.615	-20.8118
				-199.482	-25.244
				-252.244	-30.1015
				-276.509	-33.6469
				-284.068	-34.1981
				-286.116	-30.9781
				-288.932	-24.866
				-293.264	-18.0742
				-296.063	-12.8252
				-292.714	-10.2372
				-279.161	-10.3093
				-253.434	-12.5384
				-216.036	-16.071
				-169.6	-19.4206
				-118.414	-21.0072
				-67.6632	-20.6997
				-22.1371	-20.688
				15.3863	-24.5276
				45.4503	-35.003
				71.7113	-51.9512
				98.5582	-71.1964
				128.276	-85.7901
				160.254	-89.2056
				192.225	-78.335
				221.735	-54.6288
				246.931	-23.3568
				266.658	8.22208
				280.133	33.1483
				286.689	46.9784
				285.753	48.9529
				276.968	41.3716
				260.611	27.7802
				238.075	11.4888
				212.293	-4.71041
				188.081	-18.4682
				171.58	-28.6637
				168.159	-36.0357
				179.523	-41.9788
				201.772	-46.9798
				225.723	-50.6917
				239.375	-52.5131
				231.667	-51.7359
				196.594	-47.9943
				135.411	-41.5974
				54.9832	-33.1657
				-36.0238	-23.4614
				-129.771	-13.6771
				-219.81	-5.18153
				-300.66	1.3882
				-367.359	6.3395
				-415.318	9.99773
				-440.631	11.9894
				-440.959	11.6123
				-416.375	8.59123
				-369.183	3.2184
				-303.224	-4.15888
				-224.167	-13.4328
				-140.637	-24.3338
				-64.4868	-35.8605
				-8.70252	-46.1374
				16.927	-52.8176
				10.7332	-54.0869
				-17.6659	-49.9351
				-48.7709	-42.5427
				-60.695	-35.1432
				-39.4772	-30.1106
				14.6938	-27.6418
				89.4336	-26.1243
				167.519	-24.0109
				233.731	-21.4037
				278.054	-19.5865
				295.569	-19.0772
				284.679	-18.5127
				245.89	-15.2363
				182.691	-6.63019
				103.329	8.35825
				20.4151	28.0785
				-52.8857	48.7773
				-107.793	66.6568
				-142.586	79.3881
				-161.511	86.3241
				-170.79	87.8717
				-173.983	84.6158
				-169.996	77.2242
				-155.636	67.2327
				-130.181	57.2354
				-97.1067	49.8562
				-61.5341	46.5201
				-26.8867	47.0172
				5.72438	49.9473
				35.9757	53.4872
				63.1073	56.0633
				85.624	56.7986
				101.341	55.5207
				107.861	52.4577
				103.766	48.1164
				90.0235	43.2614
				70.3852	38.5075
				50.1166	33.8196
				33.8289	28.7585
				23.7428	23.3111
				19.2263	18.1253
				17.975	13.7621
				18.0086	9.98804
				18.788	6.01317
				20.9573	1.23818
				25.5045	-4.47503
				32.998	-11.0174
				43.1113	-17.9778
				54.4519	-24.4471
				64.8069	-29.5062
				71.9471	-33.1244
				74.5196	-36.1548
				72.1637	-39.0172
				64.9525	-40.6496
				53.1625	-39.4894
				37.6454	-35.4529
				20.0729	-30.3923
				2.65942	-26.8477
				-12.3232	-26.5338
				-23.2951	-29.3879
				-30.3748	-33.9119
				-35.3595	-38.6057
				-40.152	-42.7305
				-45.4467	-45.8663
				-50.9902	-47.572
				-56.4309	-47.7618
				-61.5389	-47.0615
				-66.0914	-46.3814
				-70.2411	-45.9637
				-74.985	-44.9279
				-81.9095	-41.8905
				-92.5185	-36.1015
				-107.543	-28.045
				-125.886	-19.0866
				-143.852	-10.6732
				-155.972	-3.91069
				-157.066	0.37942
				-143.936	1.61981
				-115.98	-0.463902
				-74.9852	-5.65504
				-24.5368	-12.852
				30.6279	-20.0523
				85.0418	-25.1074
				132.609	-26.5907
				167.053	-24.0853
				183.531	-18.1479
				180.704	-10.2807
				161.477	-2.50437
				132.032	3.54232
				100.186	7.17792
				73.5372	8.46392
				57.4078	7.84119
				53.0598	6.49204
				57.2763	6.81178
				64.1823	11.171
				68.0999	19.4802
				64.9473	28.7838
				51.652	35.5049
				25.4298	37.5186
				-15.4576	34.829
				-69.5084	29.4721
				-129.678	24.4154
				-183.305	21.7133
				-215.98	21.4563
				-217.656	22.0268
				-187.031	21.1195
				-131.714	17.2242
				-64.5125	10.6936
				1.70607	3.27745
				57.5293	-3.35323
				97.8304	-8.4957
				120.889	-12.1068
				126.873	-14.0576
				116.596	-13.817
				91.3499	-10.6536
				53.6807	-4.06147
				8.53691	5.72078
				-36.1741	17.2063
				-71.1281	27.8183
				-89.2926	35.206
				-89.0756	38.5661
				-74.0537	38.5333
				-49.9081	36.2418
				-21.8145	32.878
				5.65009	29.6861
				26.7705	27.6827
				33.917	27.1615
				20.0478	27.755
				-16.6695	28.9694
				-69.5162	30.3149
				-123.706	31.0376
				-161.286	30.1419
				-168.287	27.006
				-140.094	22.2093
				-82.4368	17.2669
				-8.55071	13.1276
				65.3692	9.60897
				124.704	6.21948
				159.857	2.49584
				167.76	-2.17061
				151.767	-8.1773
				120.772	-15.1631
				86.6906	-21.9188
				59.6017	-26.8081
				42.8455	-28.3918
				31.2399	-25.8944
				13.4731	-19.4012
				-22.2498	-9.82548
				-81.5309	1.18345
				-159.313	11.3978
				-240.398	18.674
				-305.18	21.9392
				-337.546	21.5225
				-330.615	18.662
				-287.916	14.883
				-220.721	11.5643
				-143.835	9.52824
				-71.5651	8.6366
				-14.6988	7.89005
				20.8446	6.42335
				33.8931	4.52694
				28.0897	3.44271
				12.245	4.29125
				-1.23069	7.29886
				-0.37987	11.5784
				22.0947	15.3067
				66.7849	16.3977
				127.97	13.5568
				195.544	6.96306
				257.873	-2.08747
				305.015	-12.1116
				331.278	-22.0192
				336.074	-30.8459
				322.314	-36.9089
				293.072	-38.1472
				249.357	-34.2602
				191.4	-27.5696
				122.321	-21.0566
				50.2999	-16.4383
				-13.6622	-13.9969
				-60.583	-13.1734
				-86.1249	-13.1496
				-89.5208	-13.142
				-71.76	-12.6556
				-35.4693	-11.9236
				14.1224	-11.7652
				69.2108	-12.7213
				121.544	-14.6489
				165.608	-17.2105
				200.703	-20.331
				230.274	-24.0077
				258.75	-27.9509
				288.135	-31.5751
				316.603	-34.2887
				339.762	-35.8206
				353.515	-36.3419
				356.396	-36.3127
				350.203	-36.1563
				339.004	-35.9076
				326.464	-35.0935
				313.008	-33.1315
				295.798	-30.1113
				270.801	-27.016
				233.486	-24.7499
				178.202	-23.0242
				98.9921	-20.4889
				-6.84091	-15.8843
				-133.877	-9.03072
				-266.539	-1.02487
				-383.542	6.29697
				-467.231	11.2251
				-511.009	12.8868
				-519.358	11.714
				-501.881	9.56726
				-467.334	8.69763
				-421.848	9.94558
				-370.621	12.4669
				-319.43	15.0831
				-273.914	16.9824
				-238.489	17.5563
				-216.973	16.5997
				-213.655	14.7242
				-232.53	13.2497
				-274.634	13.4894
				-335.403	15.9513
				-404.327	20.0869
				-467.435	24.7405
				-511.461	28.7715
				-528.65	31.3144
				-520.306	31.9708
				-495.82	31.1719
				-466.663	30.006
				-439.695	29.2993
				-414.501	28.9671
				-384.996	28.4208
				-342.732	27.3714
				-280.769	25.86
				-197.927	23.7165
				-101.132	20.5785
				-3.28475	16.5637
				82.3245	12.5585
				147.398	9.57917
				190.714	7.95321
				216.414	7.30107
				230.916	7.17019
				240.682	7.36865
				250.684	7.68146
				263.071	7.65862
				276.69	6.8882
				288.505	5.20674
				296.773	2.36753
				303.686	-2.37151
				314.949	-9.76847
				336.206	-19.2028
				368.646	-28.3803
				406.345	-35.2295
				436.6	-39.2738
				443.46	-40.6942
				414.094	-39.3071
				345.703	-34.9401
				248.83	-28.1271
				144.136	-20.0692
				53.75	-11.9795
				-7.61672	-4.72338
				-36.1241	0.91805
				-35.7847	4.07428
				-13.1499	4.14585
				25.583	1.32348
				74.1767	-3.26141
				125.344	-7.88437
				171.211	-10.9481
				204.914	-11.8028
				222.491	-10.9764
				224.399	-9.35257
				215.318	-7.12183
				201.523	-3.69697
				187.421	1.46724
				173.821	8.14144
				158.797	15.335
				139.82	21.9138
				115.811	27.1024
				88.7547	30.4515
				64.0073	31.6983
				48.221	30.8341
				45.9209	28.0935
				56.9696	23.782
				76.0278	18.196
				93.9517	11.791
				100.653	5.48263
				88.8275	0.64857
				57.3598	-1.5191
				12.2827	-0.805225
				-35.7813	2.11617
				-75.779	6.49068
				-99.478	11.5765
				-103.662	16.0103
				-91.8889	18.256
				-74.5014	17.9712
				-65.0385	16.1063
				-74.0743	13.7762
				-104.238	11.6323
				-149.694	9.89866
				-200.238	8.4108
				-246.585	6.86014
				-282.883	5.37782
				-305.941	4.54358
				-313.438	4.43474
				-303.268	4.01999
				-274.604	1.9496
				-229.383	-2.12129
				-172.383	-7.28621
				-109.55	-12.4221
				-45.9454	-17.1223
				15.0026	-21.57
				70.691	-25.8194
				118.005	-29.4538
				152.399	-31.8893
				168.059	-32.6814
				159.894	-31.562
				126.78	-28.5516
				73.742	-24.0029
				11.3257	-18.3857
				-47.9375	-12.1601
				-94.5839	-5.83987
				-125.555	-0.0137249
				-143.478	4.76891
				-153.307	8.21883
				-159.32	10.4953
				-163.787	12.1632
				-166.862	13.7545
				-167.046	15.0451
				-162.001	14.8721
				-149.589	12.1284
				-129.038	7.04578
				-102.041	1.1905
				-72.942	-3.96044
				-47.3015	-8.13658
				-29.3667	-11.9145
				-19.7933	-15.7121
				-15.2286	-19.1938
				-10.3123	-21.3609
				-0.494141	-21.3513
				15.9984	-19.3484
				37.1837	-16.5318
				57.6832	-14.0936
				71.0179	-12.5551
				72.9031	-11.8633
				63.3195	-11.5745
				45.9186	-11.0346
				25.6957	-9.98631
				7.09017	-8.99846
				-6.87734	-8.93897
				-15.2248	-9.99869
				-19.2148	-11.2475
				-21.2805	-11.1
				-23.1752	-8.39084
				-24.8543	-3.25312
				-24.5748	2.99372
				-19.4994	8.84692
				-6.58533	13.3486
				15.9641	15.7858
				47.5095	15.3735
				84.9779	11.9819
				123.439	6.89923
				156.7	2.18536
				178.659	-0.807638
				185.587	-2.04121
				177.578	-2.13257
				157.691	-1.61727
				130.199	-0.862661
				99.9662	-0.144943
				72.4894	0.499961
				53.3312	1.55679
				46.8362	4.18273
				54.711	9.28326
				74.9556	15.6946
				101.43	20.2564
				124.737	20.399
				135.12	16.0766
				126.156	9.4977
				96.8199	3.61379
				51.3447	0.399093
				-2.32897	0.0538203
				-55.2407	1.52211
				-100.349	3.42754
				-134.048	4.72964
				-155.929	5.07394
				-167.809	4.83942
				-172.448	4.78276
				-171.953	5.36997
				-166.703	6.36447
				-155.737	7.16098
				-138.159	7.40854
				-114.229	7.19057
				-85.624	6.78519
				-55.2229	6.35371
				-26.6543	5.65585
				-3.38958	4.00666
				12.496	0.903717
				20.8236	-3.06699
				22.3993	-6.30379
				18.0539	-7.24722
				9.09959	-5.11821
				-1.67392	-0.202786
				-10.2203	5.97801
				-12.8571	11.4333
				-7.90447	15.1259
				3.82525	17.1701
				19.7395	17.7421
				37.0176	16.5652
				54.4094	13.4421
				73.2525	8.65401
				96.9745	2.76853
				129.236	-3.48876
				171.505	-9.22724
				220.911	-13.7794
				269.219	-16.9978
				303.893	-18.8421
				311.413	-19.0034
				281.382	-17.1497
				210.057	-13.1878
				103.064	-7.18348
				-24.1322	0.53164
				-150.764	8.97411
				-259.026	16.6033
				-339.788	21.982
				-391.691	24.3241
				-416.287	23.7216
				-414.707	21.0605
				-388.103	17.5703
				-339.841	14.2836
				-276.81	11.6939
				-208.79	9.65885
				-145.817	7.6792
				-94.7597	5.55103
				-57.1243	3.82871
				-29.2725	3.48778
				-4.79256	4.90388
				22.3665	7.0601
				55.3334	8.0712
				92.9144	6.78776
				129.895	3.63392
				159.032	-0.133204
				173.44	-3.40264
				168.269	-5.48555
				141.549	-6.18508
				94.561	-5.86928
				32.606	-5.12897
				-33.6846	-4.23475
				-88.3377	-3.2546
				-113.515	-2.82281
				-96.3081	-4.20445
				-35.5434	-7.83385
				56.044	-11.782
				156.404	-12.7273
				242.793	-9.21244
				299.093	-3.20639
				318.424	2.02877
				301.592	4.78414
				253.945	5.53909
				183.082	5.69635
				98.8072	6.02654
				14.0948	6.09985
				-56.1028	4.91908
				-99.15	1.87208
				-109.376	-2.81476
				-89.7485	-8.34944
				-49.705	-14.0832
				-0.784712	-19.93
				47.602	-26.0969
				90.3437	-32.5077
				125.893	-38.5154
				153.765	-43.0873
				172.643	-45.3334
				180.275	-45.0755
				174.407	-42.9139
				153.667	-39.699
				118.55	-36.0717
				72.8641	-32.536
				24.2284	-29.6828
				-17.9744	-28.004
				-46.0813	-27.3921
				-56.9276	-26.8735
				-52.7689	-24.9449
				-39.8234	-20.4255
				-24.9567	-13.2099
				-12.5653	-4.2832
				-3.65098	4.77971
				2.89139	12.1544
				8.66795	16.1328
				15.3404	15.944
				24.781	12.2634
				38.515	6.59808
				55.9602	0.317444
				72.3986	-5.57574
				78.8055	-10.0995
				64.6386	-12.183
				22.3973	-11.0768
				-48.051	-6.78927
				-137.788	-0.0412714
				-231.63	8.06698
				-313.97	16.3769
				-374.294	24.0854
				-409.913	31.0366
				-424.169	37.3709
				-420.527	42.7402
				-397.363	45.9931
				-349.132	45.7869
				-273.415	41.5709
				-176.862	34.0698
				-74.2471	25.0452
				18.477	16.6202
				91.6441	10.359
				144.5	6.50009
				181.074	4.08479
				202.753	2.11088
				204.189	0.744468
				176.244	1.37693
				113.554	5.41121
				20.7437	12.9674
				-87.027	22.6008
				-188.759	31.9871
				-264.292	38.815
				-300.308	41.3886
				-293.876	39.0961
				-252.566	32.7816
				-191.511	24.5131
				-128.589	16.6766
				-79.3631	11.0294
				-53.5133	8.23599
				-53.464	8.05029
				-74.8016	9.85089
				-107.833	12.9347
				-139.932	16.4655
				-158.773	19.3241
				-156.08	20.0901
				-130.589	17.6853
				-88.5741	12.4342
				-40.6634	6.00678
				3.83519	-0.0785179
				41.0818	-5.63803
				73.0228	-11.4709
				105.011	-18.1922
				142.45	-25.5395
				187.728	-32.4789
				238.715	-37.8093
				289.542	-40.9029
				333.366	-42.042
				365.613	-42.1844
				385.619	-42.4091
				395.979	-43.1891
				400.725	-43.9621
				403.474	-43.6227
				406.257	-41.5551
				409.44	-38.1178
				412.286	-34.272
				413.197	-30.8817
				409.73	-28.2013
				399.19	-25.8825
				379.332	-23.3441
				348.385	-19.9043
				305.564	-14.7737
				252.804	-7.57421
				195.66	0.992497
				141.461	9.30876
				95.4963	15.7378
				57.7655	19.5061
				23.048	21.0622
				-15.4196	21.5007
				-61.8651	21.4651
				-116.468	20.8449
				-176.418	19.5245
				-238.024	17.9712
				-298.351	17.0482
				-355.687	17.5212
				-409.111	19.5535
				-457.66	22.4782
				-499.314	25.1877
				-530.154	26.7395
				-544.454	26.7424
				-536.157	25.5265
				-501.209	23.8809
				-439.781	22.3954
				-357.388	20.98
				-263.701	18.89
				-169.532	15.2136
				-84.0276	9.60008
				-13.1913	2.71068
				40.14	-4.10366
				75.075	-9.57228
				91.4507	-12.7913
				90.1594	-13.1777
				74.7784	-10.9111
				52.0826	-7.14515
				29.8061	-3.15341
				13.4132	0.461249
				4.91039	3.60308
				4.36422	6.31899
				11.9252	8.69527
				27.7535	10.7444
				50.2486	12.3057
				75.5721	13.0422
				99.2123	12.5421
				117.474	10.6277
				127.98	7.57866
				129.954	3.97543
				124.495	0.497445
				114.359	-2.18498
				102.8	-3.68929
				91.8946	-4.1514
				81.6886	-4.04626
				71.0431	-3.85748
				59.4843	-3.97482
				48.2243	-4.68117
				39.4829	-5.99264
				35.1837	-7.59256
				36.2409	-9.21022
				42.6203	-11.1867
				53.8378	-14.3769
				69.0246	-19.2014
				86.1345	-25.0575
				101.419	-30.8741
				110.226	-35.8604
				108.859	-39.5778
				96.6126	-41.8292
				76.8255	-42.8027
				55.9167	-42.9112
				40.7196	-42.1399
				35.33	-39.9401
				39.0074	-36.0498
				46.6983	-31.0067
				52.0009	-25.7142
				50.0029	-20.742
				38.1616	-15.9007
				16.3304	-10.4142
				-12.2714	-3.78908
				-39.8725	3.36197
				-55.4701	9.3945
				-49.5777	12.5976
				-19.6834	12.2559
				27.5957	8.94421
				79.4271	4.01145
				122.557	-0.969121
				148.041	-4.46626
				152.972	-5.41469
				139.559	-3.64357
				112.477	0.316549
				76.0556	5.66918
				33.08	11.4521
				-14.5684	16.7358
				-64.6631	20.9667
				-113.568	23.8076
				-155.819	24.8629
				-185.231	24.0224
				-197.478	21.8976
				-192.614	19.5584
				-176.074	17.7769
				-157.609	16.5772
				-148.608	15.5761
				-159.471	14.8781
				-197.898	15.6828
				-266.323	19.8246
				-357.962	28.4851
				-455.41	40.9875
				-535.251	54.2737
				-576.389	63.6765
				-566.796	65.2884
				-506.057	58.4189
				-404.785	45.8504
				-281.943	31.7923
				-159.461	19.5662
				-54.7791	10.507
				24.6266	4.14002
				81.0695	-0.850471
				121.937	-5.55031
				154.404	-10.2313
				182.125	-14.3152
				204.464	-16.7449
				218.289	-16.714
				221.07	-14.3463
				212.86	-10.6308
				196.029	-6.64293
				173.764	-2.98006
				148.905	0.0569541
				123.74	2.22785
				100.068	3.69502
				79.107	5.15405
				61.6441	7.03382
				48.4718	8.76623
				41.0408	9.19249
				41.9566	7.54112
				54.3065	3.90032
				79.7834	-0.948788
				116.914	-5.86591
				160.648	-9.99508
				203.813	-13.6837
				239.61	-18.2625
				263.568	-24.4225
				274.193	-31.2188
				272.36	-36.697
				260.29	-39.1676
				241.468	-38.1469
				220.81	-34.5756
				203.279	-30.3073
				191.8	-27.1405
				186.441	-25.8481
				184.904	-25.8237
				183.441	-25.7299
				177.699	-24.6723
				163.53	-22.7596
				138.121	-20.5471
				101.016	-18.2194
				54.226	-15.4249
				1.33029	-11.6386
				-53.795	-6.65354
				-108.042	-0.98618
				-159.407	4.33684
				-206.283	8.69249
				-246.291	12.2752
				-276.158	15.3478
				-293.309	17.5251
				-297.071	18.11
				-287.627	16.7531
				-264.668	13.5327
				-228.544	8.91774
				-182.503	4.08771
				-132.375	0.738212
				-83.7578	-0.136724
				-40.1511	0.889656
				-3.3214	2.44436
				25.9211	3.79211
				47.7074	5.19139
				63.2747	6.94599
				74.8274	8.35349
				85.1332	7.85711
				96.5728	4.35279
				109.655	-1.8928
				122.119	-9.5132
				129.825	-16.7163
				128.83	-21.776
				116.851	-23.4111
				93.9319	-21.0589
				63.0275	-15.1788
				29.5754	-7.45557
				-0.824964	-0.122149
				-25.0843	5.38464
				-43.4029	8.96962
				-57.9766	11.3087
				-71.217	13.1593
				-84.3266	14.941
				-96.1211	16.5168
				-102.841	17.4187
				-99.8258	17.4096
				-84.2258	16.7191
				-57.0472	15.6812
				-23.409	14.3498
				9.33395	12.6269
				35.0511	10.5684
				51.6772	8.37963
				60.8415	6.30286
				64.769	4.71883
				63.9772	4.16301
				57.7927	4.78601
				46.2812	5.73071
				31.193	5.46117
				15.0022	3.03953
				-0.776218	-0.851384
				-16.2317	-4.26609
				-32.2343	-5.47857
				-48.984	-3.98252
				-65.1218	-0.250613
				-78.0944	4.84225
				-85.2302	10.2652
				-84.4702	14.8705
				-74.5699	17.4937
				-55.1995	17.4234
				-26.9713	14.9611
				8.76528	11.2755
				49.9695	7.52362
				93.1407	4.21683
				132.424	1.53694
				160.784	-2.65345e-05
				173.222	0.343634
				168.915	2.62245
				150.703	5.73668
				123.383	8.1872
				92.2311	9.30705
				62.0846	9.61891
				36.8786	9.98345
				19.2544	10.618
				9.62745	11.0329
				5.19208	10.6089
				0.537824	9.10077
				-9.93638	6.83561
				-29.682	4.59952
				-59.0073	3.312
				-95.279	3.49004
				-133.894	4.72761
				-169.695	5.91596
				-198.613	6.14319
				-218.94	5.29327
				-230.918	3.94205
				-235.063	2.78767
				-231.658	2.05644
				-221.843	1.51233
				-208.11	0.993205
				-193.29	0.600528
				-179.436	0.279137
				-167.664	-0.554246
				-158.28	-2.78135
				-150.454	-7.00337
				-142.175	-13.1384
				-131.245	-20.2958
				-116.694	-27.1374
				-99.3846	-32.7789
				-81.38	-37.2342
				-64.5383	-40.7718
				-49.2112	-43.2283
				-33.6647	-44.3664
				-14.4871	-44.6286
				11.9589	-45.065
				47.7019	-46.5908
				91.7831	-49.3984
				139.586	-52.8389
				183.725	-55.8538
				217.104	-57.6317
				236.038	-57.8096
				240.812	-56.2663
				234.179	-53.1132
				220.201	-48.7977
				204.035	-43.8409
				191.145	-38.5825
				184.905	-33.3652
				184.142	-28.5741
				183.191	-24.2044
				175.178	-19.6174
				156.637	-14.0105
				130.276	-7.19287
				103.46	0.159162
				83.0346	6.86122
				70.4744	11.8063
				61.2853	14.65
				48.4806	16.1917
				26.603	17.944
				-6.12656	21.2371
				-47.348	26.6105
				-91.1212	33.7731
				-129.797	41.9199
				-156.87	49.9607
				-168.816	56.5654
				-165.096	60.5044
				-147.877	61.2621
				-122.067	59.1997
				-94.2555	55.2083
				-69.8233	50.4804
				-50.0606	46.407
				-31.8782	44.0439
				-10.3892	43.3758
				17.673	43.3495
				51.515	42.7777
				86.0273	41.1363
				114.542	38.651
				132.975	35.8631
				141.756	33.1041
				144.318	30.3111
				144.425	27.2502
				144.636	23.7543
				145.776	19.8021
				146.757	15.4816
				145.157	10.8316
				138.571	5.91881
				125.867	1.29541
				108.114	-2.00698
				88.9221	-3.29383
				72.8212	-2.7405
				61.7891	-0.970764
				52.6435	1.49572
				37.7595	4.29563
				9.30934	7.22469
				-35.2275	10.2917
				-90.3792	13.4317
				-145.312	16.3084
				-189.668	18.6499
				-218.077	20.4288
				-230.921	21.4714
				-232.208	21.2365
				-226.512	19.31
				-216.781	16.0915
				-204.509	12.6995
				-192.006	10.0498
				-183.87	8.37271
				-185.018	7.69899
				-196.779	8.10163
				-215.142	9.10203
				-232.643	9.47911
				-241.841	8.25034
				-238.166	5.75255
				-220.776	3.61644
				-191.095	3.50267
				-150.793	5.36046
				-101.081	6.8711
				-42.8198	5.13466
				22.9855	-0.898995
				93.9412	-9.73038
				165.555	-18.7418
				232.254	-26.0398
				288.87	-31.1936
				331.169	-34.873
				356.108	-38.1431
				363.139	-41.9004
				355.586	-46.5228
				339.6	-51.6906
				320.706	-56.4826
				300.821	-59.7931
				277.994	-60.8437
				248.501	-59.3973
				209.138	-55.4064
				158.016	-48.573
				94.2652	-38.6849
				18.007	-26.4949
				-68.6383	-13.944
				-159.521	-3.3547
				-243.529	3.55436
				-307.733	6.10049
				-343.164	4.54759
				-348.257	-0.146636
				-328.241	-6.46996
				-292.488	-12.5601
				-251.162	-16.8137
				-211.689	-18.4998
				-176.711	-17.7306
				-144.786	-15.046
				-112.634	-11.1886
				-76.9925	-7.0116
				-35.8716	-3.35687
				10.3324	-1.064
				58.6314	-0.894828
				105.098	-3.09424
				147.311	-7.15898
				184.876	-12.1997
				217.232	-17.358
				241.866	-21.8172
				255.602	-24.5604
				257.273	-24.5074
				249.037	-21.3271
				235.329	-15.9952
				219.718	-10.1693
				201.739	-5.13414
				177.035	-1.56165
				141.379	0.243463
				94.837	0.546922
				42.2496	0.370413
				-9.65268	0.783473
				-55.3291	1.95826
				-91.7095	3.26228
				-117.953	4.22667
				-134.509	5.12799
				-142.233	6.66827
				-141.898	9.1868
				-134.302	12.0138
				-121.363	13.7206
				-107.383	13.3754
				-98.4664	11.4551
				-99.8719	9.39139
				-113.491	8.56875
				-137.318	9.79571
				-166.354	13.2117
				-193.527	18.2871
				-210.988	23.842
				-213.112	28.2425
				-200.576	29.963
				-181.594	28.5064
				-167.013	25.0366
				-161.976	21.7915
				-160.832	20.4053
				-149.243	20.433
				-112.263	19.6269
				-43.4766	16.0554
				50.5811	9.73187
				153.763	2.1318
				248.949	-5.09451
				325.621	-10.7963
				381.167	-14.5489
				416.454	-16.5818
				431.359	-17.3714
				424.851	-17.3952
				398.174	-17.0673
				356.086	-16.4571
				304.1	-15.216
				245.069	-12.9542
				179.092	-9.49381
				106.677	-4.95567
				31.7737	0.0855515
				-38.3984	4.72931
				-96.5949	8.3846
				-139.041	11.4723
				-166.731	15.386
				-184.325	21.352
				-197.873	29.1252
				-212.608	36.8812
				-231.445	42.4697
				-254.195	44.9484
				-277.283	44.9778
				-294.482	43.6988
				-299.332	41.5932
				-288.261	38.651
				-262.211	35.0806
				-225.873	31.4138
				-185.459	28.0478
				-146.232	24.9325
				-110.923	21.8411
				-79.6904	18.7017
				-51.2826	15.5804
				-24.4497	12.8938
				1.19096	11.681
				25.2603	12.7751
				47.2212	15.4697
				66.7239	17.6955
				83.7864	17.539
				98.9378	14.2186
				112.983	8.03634
				126.813	-0.0907531
				141.72	-9.21805
				159.686	-18.7825
				183.34	-28.4663
				215.279	-37.7407
				255.857	-45.6723
				300.049	-51.1802
				336.364	-53.6143
				350.196	-53.1775
				330.353	-50.5793
				274.382	-46.2882
				189.25	-40.4382
				88.1285	-33.3485
				-13.8187	-25.6402
				-103.074	-17.8705
				-170.751	-10.4442
				-214.613	-3.8575
				-238.933	1.21913
				-251.797	4.24005
				-261.308	5.39982
				-272.149	5.94031
				-283.609	7.4296
				-290.724	10.6355
				-288.243	15.1798
				-274.045	19.9556
				-249.435	23.71
				-217.02	25.3964
				-178.762	24.107
				-135.75	19.0529
				-88.8429	10.0394
				-39.117	-2.1212
				11.7481	-15.7639
				61.1544	-28.6887
				105.679	-38.482
				141.314	-43.2483
				163.966	-42.4297
				171.37	-36.9153
				166.195	-28.5818
				157.049	-19.7655
				154.766	-12.5404
				166.294	-7.88321
				190.869	-5.47081
				220.454	-4.38577
				243.368	-4.02302
				249.198	-4.43112
				233.359	-5.91798
				199.118	-8.3024
				155.393	-10.7461
				111.933	-12.5162
				75.5973	-13.4726
				49.2411	-13.548
				32.4399	-12.307
				23.1076	-9.22816
				19.2342	-4.02335
				19.791	3.13165
				24.4238	11.1891
				32.538	18.2115
				42.7639	22.1255
				52.8539	21.7631
				59.0106	17.6325
				55.0216	11.9287
				33.3523	7.51119
				-11.1613	6.42296
				-77.0207	8.93689
				-154.117	13.6532
				-226.387	18.5451
				-278.271	22.1127
				-300.582	23.602
				-291.996	22.5166
				-256.734	18.5978
				-201.684	12.3325
				-135.104	5.03977
				-66.4654	-1.44945
				-5.54666	-5.13019
				39.9281	-4.81385
				66.2195	-1.28718
				73.4044	3.24398
				64.0605	6.80176
				41.974	8.2064
				10.9689	6.92295
				-25.4284	3.36175
				-63.0612	-1.00802
				-96.2907	-4.42496
				-118.533	-5.85702
				-123.82	-5.48935
				-108.222	-4.48471
				-70.5946	-4.29208
				-12.9529	-5.96139
				59.1977	-9.63427
				136.618	-14.2783
				207.038	-18.0215
				257.606	-19.0797
				278.24	-16.5309
				264.303	-10.5113
				217.671	-2.16972
				145.5	6.60254
				57.3289	14.0284
				-37.1767	19.3155
				-128.896	22.5077
				-209.435	23.7219
				-270.986	22.8597
				-305.642	19.7562
				-305.968	14.421
				-268.003	7.37636
				-194.505	-0.284188
				-95.4455	-7.34999
				14.8226	-13.0538
				121.925	-17.3686
				215.098	-20.8758
				288.68	-24.2672
				340.925	-27.8966
				370.764	-31.4962
				374.945	-33.8533
				348.469	-32.9943
				288.404	-27.6327
				197.616	-18.6704
				85.1743	-8.66619
				-36.4725	0.218482
				-155.161	7.53166
				-261.148	14.272
				-346.732	21.6733
				-404.543	29.8966
				-426.831	37.4774
				-407.081	41.9249
				-343.485	41.0201
				-242.621	34.0787
				-121.117	22.6122
				-3.10632	9.75677
				86.9184	-1.3542
				132.826	-8.85557
				131.866	-12.254
				93.1423	-11.9898
				31.7988	-9.01169
				-36.5848	-4.33907
				-98.9756	1.22256
				-145.837	6.99965
				-171.581	12.3675
				-175.14	16.8345
				-160.341	19.8509
				-135.009	20.7727
				-107.714	19.6437
				-83.4771	17.5795
				-62.0759	15.7735
				-40.2301	14.4914
				-15.3893	13.29
				11.756	11.9983
				37.815	11.1894
				59.8744	11.2769
				78.1699	11.3029
				95.5971	9.29757
				114.97	3.97095
				136.621	-4.15577
				157.748	-13.1222
				173.731	-20.7257
				180.719	-25.5593
				177.718	-27.507
				166.832	-27.5245
				152.199	-26.8185
				138.554	-26.1378
				129.964	-25.7011
				129.423	-25.5525
				139.189	-25.8052
				160.744	-26.4805
				193.459	-27.2679
				231.989	-27.5829
				264.571	-26.7415
				275.57	-24.2035
				252.575	-20.0022
				193.407	-14.8427
				107.678	-9.54401
				12.1067	-4.54365
				-76.4171	-0.0675823
				-145.588	3.54168
				-188.958	6.08011
				-205.308	7.97361
				-197.806	10.0546
				-173.198	12.7567
				-140.526	15.6559
				-109.299	17.7388
				-87.7177	18.3354
				-81.0217	18.0979
				-90.218	18.736
				-112.248	21.4275
				-141.693	25.7085
				-172.508	30.0214
				-198.721	33.0264
				-214.683	34.2281
				-215.918	33.5771
				-200.502	30.9727
				-169.775	26.2979
				-127.764	19.5155
				-80.4169	10.7326
				-35.2041	0.701895
				0.334201	-8.79355
				21.71	-15.6273
				29.8088	-18.6726
				30.1212	-18.5635
				29.9468	-17.3262
				35.8475	-17.128
				52.0516	-18.8639
				79.475	-21.5891
				114.939	-23.2697
				150.895	-22.0885
				177.26	-17.285
				185.957	-9.5179
				175.391	-0.772714
				151.32	6.61221
				123.479	11.1596
				100.473	12.5884
				86.6555	11.395
				82.6559	8.39571
				87.4945	4.51988
				99.8394	0.74786
				118.692	-2.09472
				143.756	-3.74055
				174.267	-4.64996
				207.078	-5.58443
				236.552	-6.99864
				256.254	-8.90854
				260.772	-11.086
				247.243	-13.0962
				216.234	-14.3308
				170.903	-14.3582
				114.774	-13.2396
				50.2154	-11.2231
				-21.1135	-8.12486
				-96.834	-3.42832
				-172.759	2.7309
				-242.402	8.81178
				-297.846	12.3588
				-333.129	11.5756
				-348.681	6.86992
				-352.668	1.02611
				-356.745	-2.48775
				-368.656	-1.83553
				-386.964	2.33981
				-401.402	8.04615
				-398.2	13.2693
				-367.153	16.1895
				-306.9	15.2813
				-225.647	10.2195
				-137.32	2.54353
				-56.3191	-5.06627
				6.42709	-10.3723
				45.8529	-12.6933
				63.9014	-12.7917
				68.6101	-11.8622
				70.4434	-10.7057
				77.6013	-9.75779
				93.695	-9.53632
				118.828	-10.6817
				151.433	-13.4172
				188.267	-17.0324
				223.413	-19.9939
				248.558	-20.6949
				254.768	-18.3254
				234.798	-13.2446
				186.105	-6.64135
				113.757	0.168453
				30.405	6.31863
				-47.6859	11.6336
				-106.385	16.3972
				-138.652	20.7442
				-146.637	24.37
				-139.459	26.9081
				-127.817	28.2798
				-119.028	28.5284
				-115.24	27.5419
				-114.701	24.9813
				-114.359	20.4803
				-111.895	14.1521
				-106.039	6.89896
				-95.7296	0.223211
				-79.8011	-4.18607
				-57.3008	-5.41015
				-27.1114	-4.49413
				12.9266	-3.96652
				65.6644	-5.69192
				132.395	-9.60854
				210.209	-14.1342
				291.326	-17.1652
				365.213	-17.2997
				422.185	-14.7633
				456.651	-11.2147
				468.447	-8.77912
				461.339	-9.01698
				439.585	-12.2043
				405.295	-17.4524
				358.6	-23.5252
				299.908	-29.4441
				232.095	-34.5134
				161.252	-37.9821
				95.5597	-38.6833
				42.7155	-35.2117
				7.22684	-26.8409
				-11.2733	-14.3929
				-18.4186	-0.136149
				-23.9324	13.1306
				-38.9982	23.1277
				-73.4183	28.9081
				-133.376	30.9086
				-219.652	29.9887
				-326.173	26.4361
				-439.842	20.0172
				-544.07	11.0697
				-626.31	1.91944
				-684.206	-2.60743
				-724.468	3.30375
				-755.352	23.2738
				-778.85	55.6304
				-787.399	92.5231
				-766.207	122.682
				-699.731	136.889
				-579.712	132.557
				-411.849	113.84
				-217.603	87.7282
				-28.5601	60.376
				124.758	35.8834
				223.131	16.1927
				262.71	1.30268
				253.311	-10.0112
				213.635	-19.4811
				164.612	-28.7993
				122.531	-38.8879
				95.4194	-49.3655
				84.3613	-58.8767
				87.282	-66.0523
				101.58	-70.2437
				125.008	-71.6374
				156.149	-70.8805
				194.264	-68.4666
				237.625	-64.3609
				281.686	-58.2135
				319.678	-49.9321
				345.811	-39.9986
				357.973	-29.1538
				357.725	-17.9964
				348.979	-7.23697
				337.348	1.71746
				330.069	6.66732
				335.312	4.99428
				359.549	-5.80776
				403.499	-26.8276
				460.39	-55.6864
				519.486	-85.8626
				571.963	-108.792
				613.394	-117.344
				641.339	-108.693
				652.263	-85.619
				641.534	-55.5703
				604.861	-27.3597
				538.497	-7.23312
				439.864	3.11775
				311.216	5.9379
				164.47	5.49592
				21.6005	6.06083
				-92.5442	10.238
				-160.995	17.7849
				-181.795	25.405
				-167.604	28.455
				-138.415	23.8418
				-112.076	11.5856
				-99.0924	-5.80984
				-104.462	-24.5109
				-132.506	-39.9624
				-188.562	-47.4833
				-275.966	-43.1692
				-391.345	-24.797
				-522.08	7.37968
				-649.027	49.8962
				-753.877	96.1054
				-825.425	137.825
				-860.11	167.674
				-859.375	180.809
				-828.829	176.501
				-778.72	159.167
				-721.431	136.641
				-665.642	115.797
				-611.97	99.0419
				-554.3	84.6645
				-485.673	70.083
				-403.63	54.2601
				-311.23	37.4405
				-214.247	19.8943
				-117.837	1.67957
				-25.21	-16.6064
				61.2847	-33.3589
				138.238	-46.5635
				201.233	-54.8872
				247.63	-58.2248
				279.102	-57.4468
				301.013	-53.8347
				319.234	-48.6087
				337.191	-42.6289
				354.705	-36.4851
				368.427	-30.8576
				373.885	-26.4721
				368.768	-23.8723
				354.881	-23.5467
				336.62	-25.6751
				317.57	-29.3961
				298.16	-32.9344
				275.435	-34.6363
				244.391	-33.5237
				200.251	-29.1231
				141.287	-21.4994
				71.323	-11.668
				0.216694	-1.60389
				-58.6515	6.43944
				-93.0309	10.7104
				-96.4937	10.464
				-70.9482	6.20459
				-26.1876	-0.433743
				22.9913	-7.07867
				61.6464	-11.2155
				80.1283	-11.1442
				77.0967	-6.89616
				58.4062	-0.425484
				33.1254	5.25389
				9.38301	7.81474
				-7.67671	7.0093
				-15.8355	4.34237
				-15.538	1.51773
				-9.85463	-0.660073
				-3.48673	-2.1723
				-1.0225	-3.02087
				-6.19812	-2.80065
				-22.6298	-1.10553
				-53.9442	1.7999
				-101.92	4.94209
				-164.346	7.19679
				-234.192	7.7748
				-299.717	6.45757
				-345.92	3.67468
				-358.499	0.0798715
				-329.279	-4.04039
				-259.711	-8.44803
				-159.947	-12.4946
				-44.3167	-15.8996
				73.1681	-19.2696
				180.55	-22.8327
				267.582	-25.3332
				325.709	-24.9611
				349.772	-21.0194
				340.58	-14.4213
				305.784	-6.93102
				257.206	-0.297152
				205.902	4.03441
				158.396	5.17632
				116.268	3.39837
				78.6487	0.216546
				45.3799	-2.47322
				18.5529	-3.38984
				1.52037	-2.34452
				-3.72696	-0.1583
				1.35616	2.01793
				12.52	3.52492
				25.7288	4.19874
				39.2928	3.66618
				53.1864	1.34219
				67.3228	-2.56492
				80.7824	-6.64383
				91.713	-9.29009
				97.6244	-9.86007
				96.4322	-8.72872
				87.3818	-6.55501
				70.7405	-3.64861
				46.7749	0.0854447
				15.4721	4.64962
				-22.3075	9.44449
				-63.2043	13.4045
				-100.943	15.6716
				-127.975	15.9886
				-138.724	14.5664
				-132.407	11.8989
				-113.142	8.6988
				-87.6505	5.83717
				-62.6102	3.91707
				-42.9669	2.48216
				-31.4638	0.295399
				-28.9234	-2.97677
				-34.4267	-5.96128
				-45.2465	-6.66824
				-57.089	-3.87904
				-65.1329	2.24465
				-65.4847	10.0944
				-55.9913	16.9761
				-36.3084	20.17
				-7.92718	18.3859
				25.8847	12.4245
				60.3128	4.46017
				89.1027	-3.2324
				105.485	-9.18071
				105.025	-13.0045
				88.719	-15.1026
				63.2996	-15.9032
				38.4335	-15.2908
				23.0465	-12.9593
				22.4765	-9.40191
				36.9857	-6.14338
				62.4446	-4.77685
				93.1749	-5.96067
				124.617	-9.28487
				153.741	-13.7825
				177.928	-18.3675
				194.485	-21.8311
				201.659	-22.8896
				199.659	-20.8479
				189.896	-16.396
				173.377	-11.5714
				150.603	-8.76579
				122.976	-9.50186
				93.2978	-13.6034
				64.1371	-19.1571
				35.7438	-23.5767
				5.57973	-25.1934
				-30.6187	-23.8616
				-77.2752	-20.1501
				-137.178	-14.5407
				-209.473	-7.38671
				-288.263	1.08997
				-363.204	10.7445
				-422.107	20.9066
				-453.985	29.988
				-451.725	36.0947
				-414.36	38.0036
				-348.485	35.5346
				-267.882	29.3826
				-190.347	20.9589
				-132.091	12.1902
				-102.39	4.98746
				-101.442	0.742466
				-122.146	0.404297
				-153.937	4.7125
				-186.393	13.7526
				-211.96	26.213
				-227.508	39.4079
				-233.834	50.1595
				-233.072	55.9016
				-225.573	55.5802
				-208.204	49.9167
				-175.704	40.7479
				-125.071	30.185
				-59.7969	20.3014
				9.95209	12.8162
[truncated: 861 more rows]

## Sheet: Participant 04
MTP_moment	Plantar_Aponuerosis_Length	MTP_angle	Time	AbductorHallucis	FlexorDigitorumBrevis
NaN	NaN	-22.2148	0	110.645	84.2113
NaN	NaN	-21.7177	0.007	101.622	84.264
NaN	NaN	-21.0863	0.014	90.3989	81.3749
NaN	NaN	-20.4046	0.021	79.2158	76.9051
NaN	NaN	-19.8137	0.028	69.9478	70.4793
NaN	NaN	-19.4017	0.035	63.2272	61.5056
NaN	NaN	-19.2189	0.042	57.9485	50.3754
NaN	NaN	-19.1352	0.049	52.3961	38.25
NaN	NaN	-19.0388	0.056	45.7615	25.9089
NaN	NaN	-18.8487	0.063	38.2407	13.0466
NaN	NaN	-18.5461	0.07	30.3314	-0.869976
NaN	NaN	-18.1087	0.077	22.4961	-14.2515
NaN	NaN	-17.5782	0.084	14.821	-22.1047
NaN	NaN	-16.9679	0.091	6.66756	-18.8018
NaN	NaN	-16.3026	0.098	-2.9378	-2.82261
NaN	NaN	-15.6055	0.105	-14.5278	21.9435
NaN	NaN	-14.888	0.112	-27.9383	49.1858
NaN	NaN	-14.1736	0.119	-42.4596	73.5176
NaN	NaN	-13.4944	0.126	-56.9426	92.0855
NaN	NaN	-12.8848	0.133	-70.1176	105.083
NaN	NaN	-12.3532	0.14	-81.2542	115.106
NaN	NaN	-11.9093	0.147	-90.4571	125.186
NaN	NaN	-11.5221	0.154	-98.0036	136.507
NaN	NaN	-11.1844	0.161	-103.308	146.709
NaN	NaN	-10.8862	0.168	-104.956	150.219
NaN	NaN	-10.617	0.175	-102.167	142.198
NaN	NaN	-10.3723	0.182	-95.7443	123.442
NaN	NaN	-10.1406	0.189	-86.9998	100.957
NaN	NaN	-9.92091	0.196	-76.4153	83.3391
NaN	NaN	-9.70965	0.203	-63.9508	74.7834
NaN	NaN	-9.50382	0.21	-50.1184	71.9106
NaN	NaN	-9.31452	0.217	-36.2408	65.5356
NaN	NaN	-9.15077	0.224	-23.7167	46.3925
NaN	NaN	-9.02337	0.231	-13.3163	11.6336
NaN	NaN	-8.93269	0.238	-5.27741	-31.8626
NaN	NaN	-8.86841	0.245	0.037104	-70.4686
NaN	NaN	-8.82089	0.252	1.88172	-92.0235
NaN	NaN	-8.77281	0.259	-0.179953	-93.2991
NaN	NaN	-8.71337	0.266	-5.67692	-80.9911
NaN	NaN	-8.64132	0.273	-13.4487	-66.4245
NaN	NaN	-8.56452	0.28	-22.0949	-59.2133
NaN	NaN	-8.48967	0.287	-30.4463	-63.7428
NaN	NaN	-8.41656	0.294	-37.7686	-78.6413
NaN	NaN	-8.34042	0.301	-43.2379	-98.6165
NaN	NaN	-8.25345	0.308	-45.5805	-118.51
NaN	NaN	-8.14749	0.315	-44.1034	-138.536
NaN	NaN	-8.01617	0.322	-40.0709	-164.2
NaN	NaN	-7.88428	0.329	-36.2558	-195.8
NaN	NaN	-7.80082	0.336	-35.148	-219.89
NaN	0.189727	-7.82618	0.343	-38.0819	-216.315
NaN	0.189811	-7.99364	0.35	-45.5004	-173.332
NaN	0.189797	-8.36075	0.357	-56.8529	-98.1134
NaN	0.189702	-8.87171	0.364	-70.3353	-14.7165
NaN	0.189531	-9.46441	0.371	-83.794	53.2888
NaN	0.189304	-10.0214	0.378	-95.7622	98.381
NaN	0.189051	-10.4461	0.385	-105.132	123.595
NaN	0.188799	-10.6466	0.392	-110.697	128.547
NaN	0.188574	-10.6964	0.399	-111.706	108.463
NaN	0.188404	-10.6908	0.406	-108.305	62.3144
NaN	0.188295	-10.728	0.413	-101.337	-2.34278
NaN	0.188226	-10.8232	0.42	-92.1778	-70.9665
NaN	0.188193	-10.983	0.427	-82.3291	-129.135
NaN	0.188183	-11.1996	0.434	-72.63	-170.234
NaN	0.188188	-11.4788	0.441	-62.9259	-196.7
NaN	0.188192	-11.8053	0.448	-52.7329	-212.955
NaN	0.18818	-12.1545	0.455	-42.6715	-215.132
NaN	0.188144	-12.5276	0.462	-35.4537	-185.858
NaN	0.188089	-12.9252	0.469	-34.5378	-102.28
NaN	0.188014	-13.3383	0.476	-41.0246	43.5109
NaN	0.187926	-13.7541	0.483	-51.9564	226.465
20.1584	0.187835	-14.1767	0.49	-61.1908	388.769
19.8666	0.187756	-14.64	0.497	-62.2219	465.474
19.5985	0.187699	-15.1619	0.504	-52.0209	423.295
19.2158	0.187672	-15.7523	0.511	-32.7723	279.407
18.7609	0.187685	-16.4011	0.518	-9.70891	85.395
18.273	0.187736	-17.0921	0.525	12.1286	-102.375
17.7824	0.187833	-17.832	0.532	29.3108	-241.538
17.2173	0.187951	-18.6153	0.539	39.7946	-305.932
16.5403	0.18806	-19.4396	0.546	42.6067	-281.489
15.6782	0.188122	-20.2872	0.553	38.5321	-172.942
14.8114	0.188105	-21.1356	0.56	31.3825	-20.6982
13.8566	0.187963	-21.9593	0.567	27.1406	106.619
12.6633	0.187712	-22.7622	0.574	29.9029	159.747
11.4193	0.187366	-23.581	0.581	39.0352	145.79
10.1743	0.186991	-24.5067	0.588	50.7293	110.495
8.87944	0.186676	-25.6592	0.595	60.9177	95.2212
7.57039	0.186539	-27.2808	0.602	66.8876	114.995
6.1097	0.186598	-29.406	0.609	68.1643	163.749
4.53764	0.18687	-32.1395	0.616	66.4442	227.817
2.96908	0.187295	-35.4558	0.623	64.1446	293.995
1.39684	0.187769	-39.2108	0.63	62.8801	352.505
-0.104486	0.188159	-43.2138	0.637	63.0239	398.837
-1.32946	0.188347	-46.9638	0.644	64.232	433.262
-2.14381	0.188196	-49.7098	0.651	66.1896	455.893
-2.54122	0.187629	-50.6235	0.658	69.0638	460.106
-2.63291	0.186647	-49.3302	0.665	73.7547	429.393
-2.49629	0.185172	-45.3212	0.672	81.621	342.946
-2.05839	0.183433	-39.8405	0.679	93.2503	192.125
-1.38112	0.181734	-34.0812	0.686	107.287	-4.22243
-0.801285	0.180456	-29.2747	0.693	120.733	-203.922
-0.480092	NaN	-25.8871	0.7	130.482	-363.495
				134.66	-458.583
				133.352	-491.193
				128.863	-483.906
				124.51	-464.172
				122.143	-448.955
				121.135	-441.661
				120.093	-438.974
				118.555	-437.007
				116.55	-432.514
				113.581	-421.82
				108.784	-401.168
				101.583	-368.532
				91.8126	-324.821
				79.7643	-274.225
				66.3877	-223.405
				53.0681	-179.141
				41.0005	-146.337
				30.6432	-126.896
				21.6244	-118.668
				13.3585	-115.965
				5.76645	-112.022
				-0.800199	-101.928
				-6.05796	-85.3139
				-10.1025	-66.649
				-13.7594	-51.2755
				-18.4263	-40.8071
				-24.8826	-33.1324
				-32.5458	-26.204
				-40.1934	-20.8882
				-47.0933	-20.1512
				-53.5961	-24.8438
				-60.9692	-30.1575
				-70.4735	-28.2833
				-82.3844	-15.1589
				-95.8884	7.06233
				-109.786	33.3255
				-123.108	58.9812
				-135.153	80.8291
				-145.303	98.0083
				-152.958	112.584
				-157.531	127.98
				-158.35	146.133
				-154.666	166.274
				-146.21	186.582
				-134.256	206.303
				-121.819	225.633
				-111.841	244.221
				-105.072	260.765
				-100.188	274.384
				-95.6653	286.141
				-90.961	298.351
				-86.2283	311.989
				-81.5849	325.193
				-76.9051	334.787
				-72.1429	339.26
				-67.385	339.833
				-62.3736	338.429
				-56.6023	335.791
				-50.175	332.828
				-44.0855	332.75
				-39.5386	339.725
				-36.9023	353.495
				-34.7373	363.252
				-29.9984	347.565
				-20.1594	284.605
				-5.35947	166.681
				11.8459	9.247
				28.2845	-150.975
				41.3811	-271.205
				49.753	-325.205
				53.64	-315.047
				54.6003	-262.856
				54.569	-194.245
				55.1234	-127.282
				57.1479	-70.3156
				60.7513	-25.2404
				65.4835	8.15935
				70.7163	29.5497
				75.7566	38.5077
				79.64	36.7441
				81.2769	28.8311
				80.2601	20.2959
				77.5294	14.8396
				74.7728	13.2919
				72.7614	14.749
				70.6692	17.9207
				67.4193	21.5652
				63.1357	24.5771
				58.984	25.9108
				56.0468	24.3467
				54.4983	18.8234
				53.7022	9.12769
				52.7852	-3.96364
				50.9163	-18.9638
				47.557	-33.9254
				42.966	-47.074
				38.1899	-58.2088
				34.3422	-69.2456
				32.1386	-82.4523
				31.8698	-98.4209
				33.2694	-115.895
				35.613	-132.792
				38.454	-147.4
				41.9728	-159.068
				45.8309	-167.951
				48.1306	-174.446
				46.8237	-178.779
				41.8384	-180.637
				34.9789	-179.118
				28.4601	-173.354
				23.8237	-163.539
				21.2917	-151.333
				19.7419	-138.835
				17.5441	-126.909
				13.5916	-114.817
				7.73014	-101.637
				0.466903	-87.7276
				-7.53852	-74.7435
				-15.7694	-64.3196
				-23.9766	-56.6857
				-32.1266	-50.3399
				-40.0346	-43.2895
				-46.7838	-35.0544
				-50.7361	-27.3733
				-50.9574	-22.9519
				-48.4617	-23.4326
				-45.0568	-27.8356
				-41.4223	-32.6711
				-37.3917	-33.8479
				-33.5803	-28.813
				-31.5339	-17.4559
				-32.1778	-1.29253
				-34.6636	18.2724
				-36.9667	40.5408
				-37.6261	64.4168
				-36.8341	87.4077
				-35.9156	105.733
				-36.0986	115.72
				-37.7638	116.368
				-40.4378	110.701
				-43.3758	104.313
				-46.1632	103.163
				-48.3712	111.719
				-48.7649	129.33
				-45.882	146.807
				-39.5425	151.107
				-30.9525	137.066
				-21.4882	111.95
				-12.1084	86.4056
				-3.72228	64.6824
				2.49593	45.5928
				5.58272	27.5047
				5.64745	9.38016
				3.99644	-9.48004
				2.41845	-28.5943
				2.2827	-46.2128
				3.89461	-60.82
				6.52602	-72.3742
				9.04598	-81.4743
				10.5705	-87.625
				10.7224	-89.0498
				9.56865	-84.4319
				7.70319	-74.748
				6.13039	-63.1656
				5.17758	-53.045
				3.77018	-46.052
				0.724856	-41.8539
				-3.63865	-39.1474
				-7.79298	-36.8922
				-10.386	-34.7314
				-11.0048	-32.6933
				-9.96547	-31.6483
				-7.83707	-34.3724
				-5.29511	-44.2026
				-3.16621	-59.7795
				-2.58674	-68.3144
				-5.2889	-43.1158
				-13.1519	45.2353
				-25.9727	198.692
				-38.9216	363.086
				-43.4963	442.663
				-32.3797	360.416
				-3.27388	110.481
				40.5443	-237.532
				89.7498	-574.608
				129.111	-799.156
				142.549	-844.417
				120.871	-682.891
				67.6918	-341.092
				2.46557	68.1422
				-46.0583	366.119
				-57.7887	415.164
				-33.2356	209.593
				11.4541	-137.352
				55.4799	-472.244
				81.5396	-678.169
				82.3079	-713.721
				62.8947	-605.44
				35.3894	-414.496
				10.2722	-204.061
				-7.56458	-18.6762
				-17.6276	121.919
				-21.3623	217.21
				-20.827	276.273
				-18.597	310.363
				-17.5011	328.953
				-19.2293	338.245
				-23.0705	341.345
				-26.6542	339.67
				-28.1213	334.585
				-27.3627	327.725
				-25.445	319.876
				-23.3456	310.237
				-21.3831	297.458
				-19.5952	281.582
				-18.1512	264.559
				-17.2226	248.391
				-16.8085	233.395
				-17.0008	218.739
				-18.1758	203.965
				-20.5342	189.73
				-23.4404	177.512
				-25.2716	168.419
				-24.2127	162.168
				-19.8804	157.103
				-13.9706	150.705
				-8.52091	140.056
				-4.09532	122.362
				-0.183142	95.8616
				3.64051	61.2515
				7.28321	23.0128
				10.1766	-11.1824
				11.6297	-33.8321
				11.3109	-41.4881
				9.49532	-36.0044
				6.90476	-22.8622
				4.15365	-8.69253
				1.39902	0.890241
				-1.1996	3.24988
				-2.8863	-0.50215
				-2.71222	-6.86645
				-0.392826	-12.4818
				3.74768	-16.0819
				9.23659	-18.5532
				15.0088	-21.3242
				19.149	-24.9859
				20.1699	-29.3464
				18.172	-34.3137
				14.5131	-40.3905
				10.8985	-48.2328
				8.59907	-57.7722
				7.99721	-67.8707
				8.63965	-76.8481
				9.63758	-83.1732
				10.2427	-85.6817
				10.3116	-83.9994
				10.1215	-79.7553
				9.73249	-76.8939
				8.83695	-79.5873
				7.15398	-89.5479
				4.61432	-104.867
				1.41749	-120.886
				-1.52653	-133.003
				-2.56998	-139.348
				-0.634962	-140.817
				3.59972	-139.229
				8.48666	-135.976
				12.9359	-131.819
				16.75	-127.061
				20.3633	-121.661
				24.623	-115.388
				30.0819	-107.845
				36.1759	-98.1002
				41.1089	-84.4565
				42.5368	-65.0899
				38.8014	-39.536
				30.1619	-10.1432
				18.9116	18.201
				7.95269	40.7871
				-0.910714	55.7818
				-7.66148	64.459
				-13.3933	69.3664
				-18.8003	71.9657
				-23.6337	71.5847
				-27.9012	66.3685
				-32.5505	54.7464
				-38.0584	36.4693
				-43.2413	13.3368
				-46.4059	-10.7876
				-47.1223	-30.7679
				-46.3059	-41.5699
				-44.9911	-39.9152
				-43.6598	-24.3654
				-42.7224	7.0949
				-43.0277	58.7186
				-45.5851	134.338
				-50.7739	231.198
				-57.5159	333.835
				-63.0291	411.68
				-63.7602	425.626
				-57.1422	347.278
				-43.0574	181.073
				-24.1216	-31.625
				-4.87461	-233.34
				9.44151	-378.727
				14.8846	-449.475
				11.668	-452.206
				4.88646	-407.582
				1.19332	-338.135
				4.58091	-260.026
				14.9257	-181.846
				29.1689	-108.203
				43.0433	-42.3695
				52.5029	13.8257
				55.1992	60.1525
				51.6327	96.793
				44.9259	122.646
				38.8973	134.955
				35.6896	131.633
				34.8302	114.254
				33.9928	88.9824
				30.4361	64.823
				22.8212	49.1466
				12.4113	43.7028
				1.76176	45.3273
				-7.70819	49.6227
				-15.8325	53.4084
				-22.1701	55.4001
				-25.8486	56.0118
				-26.4121	56.3223
				-23.9842	56.9473
				-19.0213	57.6709
				-12.0971	57.6954
				-3.75773	56.385
				5.33261	54.1926
				14.2566	52.5524
				22.1632	52.2097
				28.7799	51.8326
				34.4629	48.778
				39.6691	40.8206
				44.5153	27.0596
				48.7685	8.52149
				51.9733	-10.3396
				53.3233	-19.0555
				51.0092	0.0331253
				42.2739	66.0686
				25.7265	185.583
				4.00952	338.082
				-16.1942	473.162
				-27.0868	527.94
				-24.1311	461.949
				-8.53883	282.719
				14.7836	35.0254
				40.8246	-229.185
				64.9803	-464.66
				81.6779	-634.291
				85.5944	-717.31
				75.2075	-715.892
				54.1743	-649.084
				28.9943	-541.654
				5.58303	-416.743
				-12.4894	-292.86
				-23.7612	-182.596
				-28.3662	-91.8005
				-28.3128	-20.0549
				-27.2125	36.806
				-28.2637	83.401
				-32.3217	122.284
				-38.1538	152.675
				-43.9706	170.96
				-48.5056	173.34
				-51.3187	159.593
				-52.7569	135.57
				-53.7421	111.435
				-55.2103	94.8302
				-57.5708	84.4454
				-60.557	71.7321
				-63.2354	49.3935
				-64.3063	17.2299
				-62.6262	-19.0317
				-57.4799	-51.9738
				-48.7674	-75.6322
				-37.078	-87.0378
				-23.5682	-86.5634
				-10.3021	-76.9523
				-0.364435	-61.636
				3.79761	-43.6506
				2.30567	-25.4098
				-2.59083	-8.52078
				-8.41789	6.49519
				-13.5591	20.0789
				-17.4039	33.067
				-20.2437	45.9581
				-22.8812	58.3398
				-25.8377	69.1869
				-28.6646	77.8963
				-30.0759	84.2863
				-28.8939	87.5764
				-25.0434	86.5841
				-19.731	81.2079
				-14.6286	73.0239
				-10.7165	63.9051
				-7.76129	54.3676
				-5.17341	44.0446
				-3.42408	33.1892
				-3.8634	22.7662
				-6.89112	13.746
				-11.0259	6.74931
				-13.7805	1.80543
				-12.8534	-1.5042
				-6.91391	-3.2354
				3.71957	-2.52377
				16.586	1.83427
				27.6537	10.3668
				33.374	22.6929
				32.6299	37.7362
				26.8267	53.3814
				18.3483	66.2855
				9.12974	73.358
				0.594616	74.012
				-5.93361	70.7353
				-9.5126	67.2767
				-9.9592	65.9397
				-7.67623	66.4482
				-3.51073	67.2108
				1.5475	67.0302
				7.56701	65.5803
				16.3805	63.0315
				30.3344	59.5467
				50.2962	54.891
				74.4249	48.5887
				98.2281	40.7192
				116.439	32.4029
				125.923	25.2651
				127.338	20.5911
				124.406	18.7876
				121.587	18.7453
				121.833	17.7793
				125.658	13.2622
				131.514	4.50793
				136.712	-6.97314
				138.457	-18.5156
				135.116	-27.7108
				126.921	-33.4635
				114.85	-36.0497
				99.0684	-36.3665
				79.3803	-35.2845
				56.4778	-33.4344
				31.7033	-31.1522
				6.19443	-28.6567
				-19.4868	-26.2971
				-45.5571	-24.2499
				-72.7083	-21.9733
				-101.016	-18.4059
				-128.969	-12.8533
				-153.686	-5.81232
				-172.232	0.35388
				-182.957	1.50645
				-185.984	-6.29582
				-182.839	-24.1366
				-175.777	-49.083
				-166.832	-74.944
				-156.458	-94.6682
				-143.365	-103.652
				-126.766	-101.726
				-108.401	-92.0278
				-91.2293	-78.3203
				-76.701	-63.6624
				-64.246	-50.4812
				-52.7759	-40.2736
				-41.9521	-32.8706
				-32.1732	-26.5558
				-23.7632	-19.1522
				-16.4794	-8.99394
				-9.81222	4.6126
				-3.48595	20.9251
				2.46718	36.8326
				7.93195	47.0118
				12.7913	47.4705
				16.8887	39.3754
				20.1513	27.9491
				22.7607	18.0428
				25.2423	11.5038
				28.2577	7.85637
				31.6908	6.27733
				34.1686	6.46056
				34.3703	7.95532
				32.2519	9.5643
				28.375	9.95279
				22.9879	8.50909
				16.0297	5.24622
				7.39406	0.192537
				-2.59294	-6.71962
				-12.7064	-15.145
				-21.0718	-23.7411
				-25.8298	-30.5025
				-25.6509	-34.7116
				-20.1641	-38.3236
				-10.2907	-44.1502
				1.94406	-52.9962
				14.1902	-63.0362
				24.7384	-71.1962
				33.2915	-75.0368
				40.6365	-73.795
				46.8712	-67.9494
				50.3353	-58.2773
				49.1142	-45.6169
				43.1344	-31.2933
				34.3351	-17.2741
				25.5477	-5.63344
				19.4031	2.13719
				17.577	5.52284
				20.5867	5.18105
				28.1108	2.87546
				39.7412	0.950284
				55.937	1.38344
				78.2102	4.45373
				108.082	8.04849
				145.626	9.12846
				188.306	6.24971
				230.464	0.61331
				264.422	-4.96838
				283.339	-8.07707
				283.52	-8.01441
				264.504	-5.70013
				228.596	-2.72072
				180.869	-0.221009
				127.406	1.61662
				71.7472	3.12095
				13.8606	4.48338
				-46.5376	5.7463
				-106.222	7.23479
				-158.908	9.78619
				-199.224	14.4806
				-225.362	22.0151
				-238.205	32.0578
				-239.274	42.7612
				-230.145	50.9235
				-213.125	53.5709
				-191.576	50.0392
				-169.384	42.418
				-150.045	33.9064
				-135.753	26.7302
				-126.663	21.4365
				-120.979	17.6635
				-115.838	15.1166
				-107.874	13.8658
				-94.205	13.9257
				-74.2587	14.7975
				-50.2289	15.6816
				-25.458	16.0283
				-2.76642	15.7131
				15.9276	15.0021
				29.2707	14.6237
				36.2527	15.5944
				36.0487	18.5873
				27.8664	23.1373
				11.1894	27.4321
				-13.5179	29.4442
				-44.1646	28.5691
				-77.0678	26.0421
				-107.79	23.7362
				-132.151	22.5454
				-147.06	21.9337
				-151.474	20.8536
				-146.666	18.9214
				-134.695	16.7226
				-116.982	14.9936
				-94.7281	13.7167
				-69.5635	12.0497
				-43.3144	8.88016
				-17.7772	3.62972
				5.13352	-3.09296
				23.4737	-9.50865
				36.1678	-13.1828
				43.9306	-12.0394
				48.8244	-6.23603
				52.7135	0.935546
				56.2796	5.26496
				59.5287	4.77985
				62.7658	0.483317
				66.677	-5.15682
				71.8991	-10.0474
				78.809	-13.3095
				87.0395	-14.9744
				94.983	-15.3974
				100.716	-14.8966
				103.555	-13.5867
				104.29	-11.5043
				104.433	-8.91997
				105.423	-6.35848
				107.958	-4.14217
				111.813	-2.02025
				116.149	0.603804
				119.829	4.27761
				121.615	9.27818
				120.589	14.9722
				116.796	19.5106
				111.392	21.6903
				105.806	23.1719
				100.796	27.0433
				96.731	33.535
				94.6532	38.2874
				96.324	35.3614
				102.433	21.3944
				110.949	-1.93972
				118.156	-27.5719
				120.946	-46.4693
				117.392	-53.3306
				106.114	-48.2886
				86.3933	-34.0574
				59.328	-14.5045
				28.596	4.4114
				-0.676698	16.1217
				-24.2897	17.6421
				-40.2721	11.3648
				-48.2738	2.17257
				-48.4737	-6.69421
				-41.2666	-14.7466
				-27.4843	-22.4201
				-8.57611	-29.3605
				13.4712	-34.3021
				36.3238	-36.0707
				56.9344	-34.8288
				71.0685	-32.392
				74.4327	-30.7505
				65.0939	-30.0114
				44.5441	-28.1203
				16.1793	-22.7496
				-17.1598	-13.5423
				-54.4088	-2.7014
				-95.7751	6.38143
				-141.143	10.6852
				-188.302	7.82804
				-232.521	-4.0801
				-268.266	-25.0039
				-291.814	-48.6076
				-302.929	-55.1718
				-304.607	-7.7137
				-300.067	130.097
				-288.133	345.194
				-262.822	546.668
				-221.006	616.713
				-170.096	494.022
				-126.087	205.564
				-104.621	-155.147
				-113.004	-473.52
				-147.096	-666.134
				-193.032	-710.138
				-232.965	-633.619
				-253.113	-487.502
				-248.57	-322.488
				-221.403	-175.85
				-176.372	-66.1763
				-119.247	5.0193
				-56.8777	46.878
				3.88154	70.9282
				58.2382	84.8607
				104.46	91.6149
				143.227	92.4258
				176.51	89.2955
				206.891	84.8315
				237.009	80.7709
				268.322	77.1346
				299.204	72.8691
				324.5	67.2769
				338.343	60.7162
				337.89	54.0977
				324.636	47.9796
				302.979	42.0972
				278.003	35.8411
				254.431	29.2014
				236.606	23.0434
				227.9	18.5796
				229.676	16.65
				240.814	17.2592
				257.527	19.3651
				273.085	21.0511
				278.09	20.6286
				262.669	17.902
				220.23	14.2188
				150.472	11.4962
				60.5128	11.0301
				-36.4354	12.7573
				-125.704	15.6589
				-196.811	18.8904
				-245.949	22.2688
				-274.66	25.749
				-287.198	28.925
				-288.233	31.3491
				-281.337	33.0977
				-268.536	34.6887
				-250.996	36.5907
				-230.099	39.0319
				-207.711	42.2315
				-185.61	46.5518
				-165.174	51.7791
				-147.415	56.3271
				-132.851	58.2258
				-121.317	56.8878
				-111.996	53.277
				-103.693	48.8297
				-95.2281	44.6825
				-85.9041	41.6244
				-76.2926	40.1548
				-68.2697	40.0612
				-63.1568	40.4282
				-60.3159	41.4114
				-58.1945	46.0993
				-55.4502	58.5737
				-50.7429	78.3331
				-43.0246	97.5
				-32.5809	105.618
				-21.067	97.3126
				-10.5671	75.1914
				-2.84029	47.1861
				1.27146	21.1892
				2.21632	0.423853
				1.4826	-16.5006
				0.959779	-31.8143
				2.34528	-45.9266
				7.14787	-57.7801
				17.0399	-66.6257
				33.3145	-72.9448
				55.3709	-77.7761
				80.2793	-81.8634
				104.929	-85.997
				128.192	-91.9138
				150.137	-102.03
				170.137	-117.491
				186.521	-136.394
				197.484	-154.24
				202.182	-166.019
				201.379	-168.33
				197.25	-160.609
				191.997	-144.848
				185.66	-124.702
				175.097	-104.775
				155.929	-89.106
				126.593	-79.108
				90.9043	-72.996
				56.6676	-67.5404
				32.3283	-60.5143
				24.2326	-51.5475
				34.4037	-41.2474
				59.3141	-30.1917
				91.0685	-18.8809
				120.224	-8.00687
				138.213	1.98583
				138.888	11.28
				119.609	20.2155
				82.0171	28.746
				32.2827	36.5564
				-20.4958	43.6959
				-67.8982	51.0195
				-104.575	59.6794
				-127.539	69.5993
				-135.222	78.4125
				-128.287	82.7136
				-110.59	80.7584
				-88.8224	73.9139
				-70.1827	65.6803
				-59.0865	59.3053
				-56.272	56.0836
				-60.7748	55.4214
				-71.3586	55.8275
				-86.3853	55.8525
				-103.989	54.7786
				-122.574	52.7381
				-140.537	50.0639
				-155.678	46.8091
				-165.055	43.1512
				-165.684	39.7835
				-156.017	37.5447
				-137.105	37.0122
				-112.556	38.3828
				-87.1939	40.8546
				-65.3058	42.1797
				-49.871	40.0572
				-42.7642	34.2044
				-44.3035	26.5458
				-51.8173	19.5606
				-59.3259	14.5979
				-59.7815	11.3722
				-48.6846	8.72139
				-26.3679	5.84606
				2.93155	2.81551
				33.744	-0.0999133
				61.0582	-3.0461
				81.0961	-6.22293
				92.3431	-9.37689
				96.2761	-12.0006
				96.5323	-13.8453
				96.2744	-14.9369
				95.6042	-15.0241
				91.3244	-13.4293
				78.8979	-10.0889
				54.6623	-6.40917
				16.5374	-3.97908
				-36.3934	-2.60933
				-103.06	-0.574138
				-178.266	3.35392
				-252.259	8.51063
				-313.472	12.8832
				-352.509	14.8075
				-364.659	13.945
				-349.822	10.891
				-311.301	6.45928
				-255.293	1.35566
				-190.08	-4.0464
				-123.792	-9.81793
				-62.2369	-16.0897
				-8.2122	-22.3884
				37.6811	-27.4807
				75.6979	-29.9271
				106.416	-28.837
				130.843	-24.743
				150.132	-20.0185
				164.808	-17.5676
				174.529	-18.7082
				179.251	-22.4791
				180.35	-26.6907
				180.108	-29.6024
				180.272	-30.8685
				180.784	-31.0918
				179.727	-30.8764
				175.193	-30.4195
				167.141	-29.6345
				157.015	-28.484
				146.304	-27.2839
				136.137	-26.5349
				127.673	-26.3416
				121.944	-26.2735
				119.293	-25.6916
				119.176	-23.7906
				120.183	-19.7676
				120.397	-13.823
				118.279	-7.83397
				113.333	-4.20013
				105.976	-4.01185
				97.0124	-6.68124
				87.373	-10.8842
				78.2268	-15.4044
				70.4786	-19.3065
				63.5084	-21.7187
				55.1207	-21.7315
				43.6223	-18.7465
				29.6287	-12.9879
				15.4181	-5.50747
				3.0642	2.31174
				-6.43306	9.21454
				-12.8031	14.3367
				-16.132	17.4977
				-17.091	19.4172
				-17.1113	21.3888
				-17.8038	24.3816
				-20.1929	28.1147
				-24.4895	31.0315
				-30.2362	31.564
				-36.594	29.4226
				-42.6674	25.6468
				-47.7692	21.756
				-51.4489	18.8624
				-53.3375	17.2793
				-53.5292	16.7661
				-53.0016	17.0787
				-52.6729	18.2818
				-52.27	20.5802
				-50.7363	23.7542
				-47.2545	26.5622
				-41.7453	27.049
				-34.8595	24.0854
				-27.7996	18.5079
				-22.3642	12.473
				-20.7202	8.09618
				-24.3252	6.60334
				-32.766	7.64267
				-43.5812	9.15816
				-53.2985	8.79881
				-58.8842	5.61255
				-58.6923	0.425
				-52.7445	-5.00572
				-42.3011	-9.4674
				-29.0427	-13.0635
				-14.9087	-16.4736
				-2.35133	-19.9227
				6.5775	-22.9253
				11.4381	-24.7434
				12.8265	-25.0645
				11.1902	-24.267
				7.05385	-23.1019
				2.07578	-22.1706
				-0.735618	-21.6172
				2.01979	-21.1806
				13.121	-20.4028
				33.8512	-18.9221
				62.9291	-17.0278
				96.4401	-15.9381
				129.318	-16.94
				157.034	-20.1015
				176.522	-24.0688
				186.497	-27.1734
				187.344	-28.6829
				180.335	-28.8123
				165.977	-27.7525
				142.83	-25.2143
				108.427	-20.8539
				61.0241	-14.8328
				-0.154969	-7.8318
				-75.5018	-0.482041
				-164.205	7.10091
				-261.957	15.1487
				-359.386	23.7067
				-443.302	32.4228
				-500.848	40.8247
				-524.3	48.5424
				-513.418	54.8349
				-473.917	57.9557
				-414.194	55.9358
				-343.394	48.2736
				-270.822	36.4506
				-204.913	23.1026
				-151.27	10.8834
				-110.985	1.62066
				-81.197	-3.83499
				-57.8937	-5.27501
				-37.957	-3.29138
				-19.1381	0.0646192
				0.184963	1.23352
				21.1458	-4.21128
				44.9421	-20.5731
				72.7428	-49.8799
				104.657	-87.9115
				138.942	-121.907
				172.463	-136.62
				202.057	-125.714
				225.493	-95.555
				241.738	-58.5478
				251.167	-25.2084
				255.327	-0.432242
				255.451	16.4643
				250.832	29.1315
				239.238	40.8696
				219.247	52.9792
				191.812	65.2035
				159.829	76.7326
				127.547	86.7318
				100.152	94.4507
				81.756	99.3554
				73.0264	101.537
				71.2245	101.885
				72.2056	101.589
				72.0148	101.537
				67.4139	102.295
				56.2533	104.389
				38.1998	108.186
				15.48	112.936
				-7.27097	116.129
				-24.555	114.879
				-32.228	108.176
				-29.1464	97.4768
				-17.185	85.514
				0.573036	74.5758
				21.6341	65.4384
				43.8526	57.5853
				64.6641	50.1816
				82.12	42.8105
				96.2439	35.4906
				108.368	28.3672
				119.044	21.6268
				126.755	15.4617
				128.511	9.87581
				121.192	4.76244
				102.409	0.400586
				71.2977	-2.23375
				29.9252	-1.96982
				-15.7635	1.16553
				-57.0185	5.07205
				-85.3017	7.04179
				-95.434	6.38191
				-87.2811	5.15827
				-65.49	5.86207
				-37.0873	7.88164
				-8.40098	7.48821
				15.9638	2.33436
				32.7122	-6.00348
				40.5436	-14.5266
				40.9708	-21.5076
				37.0325	-26.5834
				31.0413	-30.0814
				23.7471	-32.6577
				14.8796	-34.8539
				4.04604	-36.6206
				-8.31806	-37.2776
				-20.682	-35.8407
				-31.4944	-31.7395
				-40.2839	-26.0409
				-47.1773	-21.6677
				-51.9089	-21.4025
				-54.0012	-25.5436
				-53.3346	-31.5818
				-49.9063	-35.9372
				-43.6466	-36.4688
				-35.9692	-34.6436
				-33.1761	-37.0589
				-48.8362	-56.0227
				-100.683	-107.279
				-199.09	-200.877
				-331.003	-326.062
				-458.026	-447.932
				-540.861	-529.895
				-565.277	-558.873
				-541.922	-545.291
				-490.258	-507.263
				-427.45	-458.933
				-365.254	-406.949
				-309.75	-353.268
				-261.862	-300.343
				-219.151	-252.37
				-177.824	-212.292
				-133.814	-179.883
				-83.9607	-153.091
				-27.5374	-130.211
				33.1597	-110.58
				93.0542	-93.8942
				145.269	-79.6436
				183.591	-67.0327
				204.749	-54.8326
				208.351	-41.1364
				195.748	-23.5764
				169.401	-0.325664
				132.694	28.8799
				90.2994	62.627
				48.7965	98.6106
				16.0389	134.781
				-1.21719	169.862
				-0.0341195	202.481
				17.5386	230.33
				45.7912	251.347
				78.2804	265.548
				110.584	275.019
				141.83	282.211
				174.592	288.211
				212.688	292.421
				257.515	293.892
				305.498	292.631
				349.098	289.668
				380.517	286.333
				394.778	283.38
				390.323	280.533
				367.984	276.883
				330.003	271.696
				279.858	264.77
				222.204	256.373
				162.315	247.296
				105.497	238.592
				56.5906	230.222
				19.0549	220.136
				-5.95792	205.791
				-19.624	186.502
				-24.6184	164.043
				-23.9927	141.36
				-20.2639	120.608
				-15.4127	102.151
				-11.8557	85.3287
				-12.4721	69.573
				-18.5332	54.559
				-28.4844	39.9258
				-39.6931	25.2793
				-50.4819	10.4367
				-60.1111	-4.28384
				-67.764	-18.0862
				-72.16	-30.1146
				-72.2465	-39.7868
				-68.4802	-46.7738
				-63.2434	-50.9577
				-59.4081	-52.86
				-58.472	-54.0061
				-60.2304	-56.0871
				-63.8223	-59.7338
				-68.6378	-64.4272
				-74.0994	-69.2525
				-78.921	-73.812
				-81.6813	-78.8123
				-82.6928	-85.6435
				-83.5887	-94.9789
				-82.6638	-104.283
				-69.4308	-103.715
				-23.0165	-72.7253
				81.8307	15.9523
				256.542	177.669
				476.688	391.247
				682.591	597.355
				805.772	725.656
				793.478	721.78
				627.475	566.444
				347.213	297.037
				46.4931	4.6832
				-182.069	-219.583
				-302.718	-340.89
				-334.22	-379.467
				-313.255	-373.493
				-270.349	-352.7
				-225.119	-331.483
				-188.899	-312.848
				-167.347	-295.736
				-161.59	-279.482
				-168.908	-264.194
				-183.638	-249.988
				-198.689	-236.819
				-207.661	-224.524
				-206.501	-212.857
				-193.963	-201.534
				-171.707	-190.189
				-144.298	-178.231
				-118.499	-164.84
				-101.754	-149.618
				-100.101	-133.459
				-116.192	-117.963
				-148.258	-103.56
				-190.439	-88.8464
				-234.577	-72.3853
				-272.309	-55.2488
				-296.49	-40.9453
				-302.926	-32.0702
				-291.754	-28.0228
				-266.255	-26.4529
				-230.447	-25.5611
				-187.974	-24.7454
				-141.909	-24.168
				-94.9055	-24.0841
				-49.854	-24.3451
				-10.2525	-24.3704
				20.6693	-23.3232
				41.4596	-20.252
				52.9665	-14.6055
				57.6077	-7.25135
				58.5629	-0.776911
				59.0307	2.12957
				61.091	0.874647
				65.2601	-2.68612
				71.4034	-5.86766
				79.5807	-6.98563
				89.8522	-5.8928
				101.372	-3.29061
				111.928	-0.0620249
				119.289	2.91269
				123.015	4.96835
				124.244	6.01159
				124.347	6.59383
				124.475	7.55272
				125.55	9.50638
				127.89	12.4865
				130.812	15.9863
				132.416	19.6067
				130.211	23.7041
				122.833	28.7484
				111.057	33.8798
				96.9575	37.0413
				82.6706	36.7359
				69.9005	33.1755
				59.9331	27.9628
				53.8662	23.0121
				52.3727	19.6703
				54.7118	18.4666
				58.6175	19.2562
				61.899	21.4251
				63.5427	23.961
				62.9351	25.3714
				59.2195	23.6452
				52.2594	16.7195
				43.5046	4.06626
				35.1689	-11.3249
				28.9121	-23.5688
				25.3634	-27.7255
				23.981	-22.5718
				23.0563	-10.3904
				20.4833	4.24065
				14.7732	16.435
				5.44376	23.4817
				-6.98709	25.7427
				-21.1508	25.5299
				-35.345	25.3273
				-48.3538	26.5522
				-60.1614	29.2851
				-71.5804	32.7413
				-82.5792	35.9719
				-91.6635	38.3322
				-97.4309	39.6253
				-99.8055	40.0121
				-99.4418	39.7196
				-96.5193	38.8571
				-90.6866	37.5734
				-82.6502	36.3797
				-75.4398	36.4085
				-73.1214	38.9795
				-77.8166	44.0048
				-87.9265	48.8505
				-98.8921	49.8516
				-105.39	45.2227
				-103.49	36.2678
				-91.8654	26.1608
				-71.5094	17.6502
				-44.5902	11.5807
				-13.9451	7.26783
				16.9519	3.80595
				44.9867	0.725145
				68.5511	-2.30741
				87.2285	-5.71874
				100.883	-9.70412
				109.31	-14.0481
				112.356	-18.4381
				110.49	-22.6663
				105.225	-26.3744
				98.0757	-28.8398
				88.5394	-29.2558
				73.3748	-27.4834
				48.4023	-24.5948
				11.4656	-22.2111
				-35.618	-21.1808
				-87.0993	-21.0973
				-135.226	-20.9014
				-173.322	-19.9316
				-198.489	-18.6952
				-212.395	-18.7025
				-219.65	-21.6337
				-224.66	-28.7209
				-228.733	-40.036
				-228.293	-52.8228
				-211.746	-57.4568
				-155.117	-31.7027
				-27.7548	55.8097
				181.644	221.495
				434.814	435.775
				649.43	624.025
				748.303	711.801
				701.298	667.101
				525.943	502.185
				274.226	260.638
				23.6419	11.0772
				-151.989	-178.169
				-223.66	-279.001
				-211.748	-308.798
				-155.211	-300.782
				-87.2704	-280.48
				-29.8219	-260.086
				6.06487	-241.9
				20.1129	-224.5
				20.0864	-206.938
				15.6002	-189.45
				13.2028	-172.74
				14.9925	-157.433
				19.5558	-143.509
				23.7149	-129.922
				23.977	-115.094
				17.5463	-97.9884
				3.2489	-79.0542
				-18.1802	-60.565
				-44.6961	-45.5055
				-73.5003	-35.4263
				-101.395	-29.4452
				-125.299	-25.2036
				-142.588	-20.6507
				-151.506	-15.2547
				-152.18	-9.8204
				-146.809	-5.37202
				-137.785	-2.33623
				-125.918	-0.525477
				-111.078	0.525615
				-93.9193	1.27633
				-76.4539	2.07282
				-60.9726	3.21324
				-48.5683	4.95929
				-38.7156	7.50579
				-29.8811	11.1005
				-20.4058	15.9878
				-9.24205	21.7513
				3.77472	26.8057
				18.1235	29.259
				32.9622	28.4397
				47.5138	25.3715
				61.5153	21.934
				75.4303	19.5128
				89.75	18.213
				103.643	17.2462
				114.752	15.8351
				120.963	13.7823
				122.116	11.5528
				119.713	9.93905
				115.393	9.43553
				110.072	9.84444
				104.294	10.589
				98.5291	11.2705
				92.6184	11.9602
				85.6099	13.4014
				76.7428	16.5876
				66.2444	21.3518
				54.9474	25.6702
				43.5932	27.0091
				32.7365	24.2928
				22.8909	18.55
				14.5526	11.9972
				8.38756	6.64414
				5.0791	3.49419
				4.0129	2.44926
				2.23914	2.81872
				-3.94119	4.14423
				-16.1944	6.31427
				-33.5694	9.03425
				-53.6486	11.69
				-73.2427	13.5605
				-88.9787	14.032
				-98.4721	12.96
				-101.115	11.0783
				-97.7273	9.99809
				-89.7425	11.2573
				-78.8434	14.6816
				-66.8886	17.8374
				-55.4222	17.7483
				-44.9938	13.1512
				-35.2969	5.16369
				-26.0906	-3.63099
				-17.9563	-10.7306
				-12.6436	-14.8079
				-13.3683	-15.7571
				-24.3235	-14.1365
				-48.207	-10.7529
				-83.2996	-6.6827
				-123.023	-3.17443
				-158.333	-1.07295
				-181.331	-0.565143
				-188.327	-1.57678
				-180.603	-4.08297
				-162.481	-8.033
				-138.518	-12.985
				-111.579	-17.5125
				-81.6978	-18.8068
				-45.3207	-12.1375
				4.4635	10.0711
				74.42	56.1742
				161.407	125.771
				238.497	193.988
				260	212.688
				204.407	153.317
				104.792	44.6523
				14.7065	-56.4584
				-38.7127	-117.276
				-57.258	-138.867
				-52.3693	-137.442
				-34.9028	-128.639
				-13.9555	-120.45
				3.77146	-113.904
				15.7319	-107.893
				22.4996	-101.734
				24.7246	-94.6324
				22.049	-85.5968
				14.0023	-74.7552
				1.05596	-64.1232
				-14.7679	-56.381
				-29.9714	-52.7596
				-40.675	-52.2894
				-44.231	-52.9956
				-40.0854	-53.6172
				-29.7933	-54.0757
				-16.8653	-54.5332
				-5.59755	-54.5719
				1.33972	-53.5195
				3.98925	-51.1826
				3.63904	-47.9502
				1.13488	-44.4502
				-3.27785	-41.2966
				-9.34554	-38.8652
				-16.3812	-37.0873
				-23.3598	-35.4836
				-29.6604	-33.4877
				-35.7464	-31.0597
				-42.9137	-29.5479
				-52.5493	-31.8017
				-65.4296	-40.0198
				-80.026	-52.0898
				-89.2419	-59.1221
				-77.9828	-45.6089
				-25.6763	7.14658
				82.0636	111.592
				236.3	259.858
				402.581	420.974
				543.206	559.254
				638.52	653.96
				687.094	701.393
				694.157	705.575
				659.679	666.913
				572.109	574.82
				416.174	414.241
				197.535	190.352
				-37.4492	-50.3778
				-222.947	-240.499
				-322.077	-341.692
				-344.36	-364.86
				-322.338	-345.761
				-286.173	-315.339
				-255.053	-288.549
				-237.769	-267.426
				-234.476	-248.872
				-239.198	-230.242
				-244.76	-210.514
				-246.928	-189.729
				-243.254	-168.804
				-229.7	-149.308
				-201.709	-132.679
				-159.229	-119.275
				-109.481	-108.038
				-64.2751	-96.9953
				-33.9955	-84.275
				-22.7306	-68.9368
				-27.4673	-51.0903
				-40.5689	-31.772
				-52.5672	-13.374
				-53.9652	0.424617
				-37.4249	6.5972
				-0.705191	5.05948
				52.028	-1.15182
				112.13	-7.82927
				170.538	-11.9905
				221.148	-13.0131
				260.54	-11.8551
				285.01	-9.54741
				289.835	-6.45919
				271.866	-2.47922
				231.782	2.4936
				174.603	8.2949
				108.648	14.5579
				42.2578	20.8357
				-20.0954	26.889
				-78.7097	33.1599
				-136.028	40.7726
				-193.126	50.4833
				-247.625	61.1846
				-294.268	69.8093
				-327.835	73.3838
				-345.858	71.1696
				-349.095	64.8693
				-340.308	57.2827
				-322.68	50.6941
				-298.488	45.9969
				-268.812	42.9512
				-234.144	40.9003
				-194.76	39.1026
				-151.333	36.8843
				-106.223	34.0784
				-63.7756	31.1401
				-28.9222	28.6063
				-5.31157	26.7595
				6.15557	25.6984
				7.92881	25.4035
				4.96528	26.0041
				2.59376	27.9698
				4.47555	31.2355
				11.8901	34.1128
				24.288	34.1651
				40.5982	30.3347
				60.4886	23.6255
				84.5829	15.8725
				113.852	8.24368
				148.491	0.987623
				186.254	-5.86784
				222.36	-12.1321
				251.942	-17.5059
				271.775	-21.7071
				279.847	-24.6435
				275.048	-26.4799
				257.479	-27.4894
				228.246	-27.812
				189.244	-27.375
				143.72	-26.1074
				96.7239	-24.0621
				54.3272	-21.2646
				21.6931	-18.0808
				1.24132	-15.9314
				-7.47307	-16.715
				-6.25204	-21.1306
				2.77614	-27.9557
				16.9671	-35.1177
				33.5665	-41.4792
				50.807	-47.4298
				67.1221	-53.5883
				79.2708	-59.0603
				83.3475	-61.4337
				78.0512	-59.0296
				65.7576	-52.726
				50.254	-45.0876
				34.0927	-38.4656
				18.2013	-34.0924
				3.1093	-31.9317
				-10.3616	-30.8091
				-21.5012	-28.8884
				-30.1846	-24.6209
				-36.6545	-18.0854
				-41.0251	-11.5433
				-43.3971	-7.95258
				-44.5763	-8.82828
				-46.4922	-13.8357
				-51.6715	-22.2082
				-61.6087	-34.4928
				-75.1099	-52.5208
				-88.6556	-76.4631
				-98.5422	-101.878
				-102.582	-121.388
				-100.885	-129.866
				-96.3319	-127.001
				-94.1134	-115.563
				-99.7028	-98.9516
				-115.949	-80.0369
				-141.076	-60.883
				-169.513	-42.8064
				-195.507	-26.3737
				-216.305	-11.4916
				-231.996	1.77298
				-242.972	12.3518
				-247.462	18.7944
				-240.52	20.6222
				-215.597	18.6731
				-168.246	14.4939
				-99.1918	9.60289
				-15.486	5.01725
				69.9898	1.4176
				141.689	-0.485337
				187.409	-0.355885
				203.229	1.29871
				193.151	3.63311
				164.921	6.07311
				126.39	8.2899
				83.7781	10.0773
				41.0632	11.5598
				0.413458	13.2826
				-36.569	15.5514
				-68.2081	17.4661
				-93.0224	17.0354
				-108.716	13.7968
				-108.709	13.7447
				-78.8173	32.9364
				0.381084	94.0804
				138.752	211.068
				315.786	367.962
				482.406	519.282
				593.233	621.351
				630.692	657.862
				597.059	631.956
				496.384	546.108
				331.924	398.701
				123.146	201.697
				-80.9188	-3.03126
				-223.448	-161.133
				-280.028	-245.109
				-268.699	-266.432
				-226.151	-253.642
				-182.921	-230.206
				-153.962	-207.731
				-140.192	-188.199
				-132.491	-167.573
				-115.627	-138.13
				-75.1697	-91.907
				-8.14908	-28.4832
				65.8768	33.9352
				108.054	59.6013
				93.596	26.5657
				41.1735	-43.8775
				-8.41274	-108.009
				-31.5762	-141.033
				-28.2256	-145.335
				-7.24668	-134.198
				21.6568	-119.203
				49.1177	-105.996
				68.13	-94.8301
				77.2579	-83.8222
				80.7968	-71.594
				85.6615	-57.8205
				97.5877	-43.6127
				117.677	-31.6815
				140.396	-24.568
				155.041	-22.4938
				150.666	-23.3212
				121.242	-24.1902
				67.9283	-23.2114
				-1.84731	-20.0522
				-77.2756	-15.371
				-147.703	-10.0994
				-205.832	-5.09478
				-250.115	-1.01492
				-284.766	1.90136
				-316.248	4.07861
				-348.754	6.39816
				-381.843	9.60679
				-410.775	13.8107
				-428.941	18.4713
				-430.824	22.9694
				-413.971	26.9792
				-379.95	29.9632
				-333.763	30.5338
				-281.107	27.1359
				-225.25	19.6907
				-166.199	10.1591
				-102.197	1.28007
				-31.7259	-5.21358
				44.5256	-9.32516
				121.894	-12.1347
				192.146	-14.6309
				246.714	-16.9926
				279.829	-18.6293
				289.805	-18.7869
				279.731	-17.1939
				257.615	-14.2808
				234.698	-11.0297
				222.092	-8.54741
				227.033	-7.41762
				249.655	-7.22782
				281.506	-6.83656
				307.963	-5.5643
				314.871	-4.11205
				295.64	-3.77802
				254.024	-4.97509
				201.164	-6.96184
				149.388	-8.75796
				107.266	-9.9844
				78.2508	-10.7612
				60.9878	-11.0946
				50.1513	-10.7235
				39.4316	-9.42797
				25.0736	-7.27744
				6.37636	-4.61272
				-15.9273	-1.84037
				-40.3049	0.828447
				-63.7088	3.40828
				-81.1886	5.76347
				-87.2995	7.42649
				-79.1372	8.15792
				-58.5937	8.56311
				-31.8543	9.57968
				-6.82701	11.0981
				10.0987	11.6117
				16.6094	9.6747
				14.5774	5.41739
				7.54826	0.293165
				-1.77595	-4.24047
				-12.0282	-7.30217
				-22.8059	-8.49764
				-34.2164	-8.06241
				-45.9233	-6.83486
				-57.2708	-5.57436
				-69.0896	-4.30625
				-84.434	-2.47389
				-106.917	0.340993
				-138.415	4.01251
				-177.597	8.14768
				-219.584	12.5734
				-257.339	17.6021
				-284.488	23.7574
				-297.434	30.7176
				-295.329	36.658
				-278.911	39.3162
				-249.924	37.6302
				-211.167	32.2524
				-165.884	24.9152
				-116.626	17.3169
				-65.1894	10.262
				-13.9994	3.6129
				33.2352	-3.12559
				73.5763	-10.2645
				106.975	-17.6786
				135.262	-24.3589
				160.459	-27.7355
				185.936	-23.7847
				217.854	-8.8359
				261.133	16.8889
				309.557	43.9899
				342.454	53.215
				341.51	30.9525
				309.841	-13.3351
				264.813	-56.2962
				218.573	-83.3949
				173.109	-94.4356
				126.166	-95.1598
				75.7702	-90.7395
				21.4363	-84.005
				-35.9033	-76.0169
				-94.3063	-67.3118
				-151.081	-58.5358
				-201.871	-50.3297
				-240.33	-43.1917
				-260.556	-37.4999
				-259.714	-33.5012
				-237.961	-31.3546
				-197.642	-31.1576
				-144.501	-32.6846
				-88.9168	-35.1143
				-44.035	-37.2122
				-21.9608	-38.0302
				-30.4818	-37.9298
				-70.3062	-38.5602
				-132.67	-40.1288
				-199.004	-37.2996
				-244.335	-16.9671
				-244.149	39.2129
				-185.242	143.742
				-79.3386	285.836
				36.4217	427.207
				124.241	525.149
				170.067	558.065
				178.711	524.374
				154.688	427.713
				100.458	276.293
				34.0164	97.0348
				-7.64283	-63.8109
				2.97938	-168.264
				59.4936	-210.933
				132.431	-211.431
				194.73	-192.495
				234.136	-169.015
				250.819	-148.36
				250.612	-133.12
				240.907	-123.039
				229.227	-116.431
				221.707	-111.372
				221.356	-106.636
				228.193	-102.01
				240.982	-97.8957
				257.935	-94.6778
				275.717	-92.2572
				288.034	-89.9459
				285.581	-86.6202
				259.288	-80.9703
				205.243	-72.0686
				127.364	-60.0683
				35.8827	-46.1799
				-57.3061	-31.8238
				-142.474	-17.7699
				-212.021	-4.17921
				-259.15	8.12343
				-279.063	16.8282
				-271.187	19.5907
				-239.236	16.0868
				-190.26	8.36325
				-133.963	-0.230942
				-80.2882	-6.71743
				-35.4064	-9.83116
				-0.5173	-9.85799
				25.2569	-7.54451
				42.2151	-3.58346
				50.4866	1.23511
				51.2888	6.00189
				46.6206	9.93581
				38.4913	12.5757
				29.5923	13.7629
				24.1494	13.5715
				26.1938	12.4978
				36.0492	11.6541
				49.1322	12.2692
				58.3901	14.5355
				57.0395	17.1154
				39.3054	18.3891
				1.26403	18.1981
				-56.5999	18.0293
				-127.213	19.5792
				-197.391	23.2469
				-251.9	27.9085
				-280.349	31.8499
				-282.511	33.7803
				-267.61	33.396
				-248.741	31.4095
				-236.375	28.953
				-233.062	26.695
				-231.499	24.3537
				-218.609	21.0057
				-184.084	16.0182
				-127.164	9.82723
				-56.8552	3.80305
				12.7675	-0.610687
				67.5374	-2.84564
				95.8074	-3.68489
				88.9687	-4.48424
				42.324	-5.50767
				-42.7575	-5.33847
				-158	-2.14219
				-289.588	4.76771
				-420.078	14.6385
				-531.615	25.8499
				-610.026	36.0801
				-644.753	42.2537
				-624.979	41.4397
				-539.949	32.4736
				-386.151	16.5653
				-175.102	-3.77102
				65.4659	-26.0728
				298.984	-48.1689
				491.865	-67.5238
				622.72	-81.0251
				683.937	-85.8992
				677.096	-81.1425
				608.738	-68.4048
				490.597	-51.4529
				341.721	-34.5161
				186.88	-20.6997
				49.4139	-11.1308
				-57.0357	-5.09416
				-132.402	-0.953052
				-187.525	2.80332
				-235.479	6.84251
				-281.794	10.742
				-321.669	13.1732
				-345.546	12.5323
				-345.944	8.06691
				-319.661	1.41085
				-265.292	-1.77797
				-180.08	8.79342
				-61.0147	45.5139
				86.782	114.646
				239.25	204.535
				357.195	284.664
				410.115	325.376
				395.228	318.649
				332.541	277.208
				248.903	220.287
				168.116	163.437
				108.441	115.243
				82.2586	77.9822
				95.1961	50.174
				145.532	28.7684
				225.231	10.3042
				322.186	-8.11348
				422.93	-27.8819
				515.48	-48.5937
				591.06	-68.5383
				644.63	-85.7957
				675.322	-99.2024
				686.135	-108.351
				682.069	-113.031
				667.91	-113.297
				647.229	-110.395
				622.997	-107.278
				598.92	-107.378
				579.641	-112.4
				568.74	-121.076
				566.462	-129.76
				569.708	-134.452
				573.099	-132.874
				567.978	-125.804
				539.688	-117.953
				467.621	-118.27
				331.396	-138.255
				121.814	-185.48
				-147.64	-251.907
				-438.107	-309.381
				-701.345	-327.245
				-903.174	-297.093
				-1031.46	-235.494
				-1089.86	-167.162
				-1092.23	-109.96
				-1059.46	-69.7438
				-1014.25	-43.0448
				-973.815	-23.3952
				-944.911	-6.1697
				-924.985	10.2999
				-907.557	25.9573
				-887.26	40.3459
				-861.655	53.0401
				-830.965	63.6977
				-797.289	72.1207
				-762.88	77.8729
				-728.416	79.9369
				-692.959	77.4534
				-654.74	70.7529
				-611.506	61.3652
				-560.727	51.3395
				-499.955	42.544
				-427.032	36.1233
				-340.198	32.517
				-239.009	31.8755
				-126.035	33.8059
				-7.25622	36.7887
				109.77	38.8931
				218.405	39.2642
				314.35	38.3189
				395.329	36.5538
				460.159	33.8804
				508.792	30.4945
				542.293	27.6962
				561.976	27.1586
				569.378	29.6632
				567.063	34.7423
				558.289	41.1111
				545.736	47.3299
				530.857	52.607
				513.828	57.2814
				493.604	62.3907
				468.366	68.6946
				436.027	76.2747
				394.145	84.954
				340.095	94.0703
				272.203	101.605
[truncated: 850 more rows]

## Sheet: Participant 05
MTP_moment	Plantar_Aponuerosis_Length	MTP_angle	Time	AbductorHallucis	FlexorDigitorumBrevis
NaN	NaN	-31.035	0	45.7228	20.8208
NaN	NaN	-31.1926	0.00765	48.4146	22.4041
NaN	NaN	-31.3096	0.0153	51.136	23.0447
NaN	NaN	-31.4661	0.02295	53.6793	22.8657
NaN	NaN	-31.6688	0.0306	55.7078	21.9718
NaN	NaN	-31.831	0.03825	57.0167	20.3802
NaN	NaN	-31.8176	0.0459	57.5524	18.0657
NaN	NaN	-31.515	0.05355	57.3367	15.0536
NaN	NaN	-30.9049	0.0612	56.4943	11.5123
NaN	NaN	-30.0131	0.06885	55.3553	7.80057
NaN	NaN	-28.9283	0.0765	54.378	4.4169
NaN	NaN	-27.7491	0.08415	53.8047	1.77531
NaN	NaN	-26.553	0.0918	53.3136	-0.134038
NaN	NaN	-25.3908	0.09945	51.8747	-1.9469
NaN	NaN	-24.3113	0.1071	47.9872	-4.76787
NaN	NaN	-23.3297	0.11475	40.4947	-9.66138
NaN	NaN	-22.4743	0.1224	29.5249	-17.0626
NaN	NaN	-21.7205	0.13005	16.6475	-26.4594
NaN	NaN	-21.0811	0.1377	4.13613	-36.4416
NaN	NaN	-20.5236	0.14535	-5.89827	-44.9452
NaN	NaN	-20.0297	0.153	-11.9377	-49.718
NaN	NaN	-19.5594	0.16065	-13.2093	-49.2364
NaN	NaN	-19.104	0.1683	-9.89999	-43.6491
NaN	NaN	-18.6695	0.17595	-3.27006	-34.7812
NaN	NaN	-18.2607	0.1836	4.71598	-25.092
NaN	NaN	-17.8635	0.19125	12.0885	-16.5801
NaN	NaN	-17.4621	0.1989	17.3398	-10.3915
NaN	NaN	-17.0474	0.20655	19.4223	-6.94802
NaN	NaN	-16.6258	0.2142	17.6725	-6.11263
NaN	NaN	-16.225	0.22185	12.1228	-7.24223
NaN	NaN	-15.8725	0.2295	3.83064	-9.31048
NaN	NaN	-15.5793	0.23715	-5.47536	-11.2419
NaN	NaN	-15.318	0.2448	-14.1546	-12.3084
NaN	NaN	-15.0672	0.25245	-21.0809	-12.3384
NaN	NaN	-14.8191	0.2601	-25.7247	-11.6378
NaN	NaN	-14.6002	0.26775	-28.0856	-10.6484
NaN	NaN	-14.444	0.2754	-28.466	-9.56688
NaN	NaN	-14.3754	0.28305	-27.3165	-8.21375
NaN	NaN	-14.3502	0.2907	-25.2071	-6.21311
NaN	NaN	-14.3298	0.29835	-22.6784	-3.34173
NaN	NaN	-14.2855	0.306	-20.1422	0.260106
NaN	NaN	-14.2055	0.31365	-18.0423	4.22295
NaN	NaN	-14.0907	0.3213	-16.987	8.15252
NaN	NaN	-13.9404	0.32895	-17.5644	11.6114
NaN	NaN	-13.7505	0.3366	-19.894	14.063
NaN	NaN	-13.5233	0.34425	-23.2842	14.9895
NaN	NaN	-13.2621	0.3519	-26.4391	14.1262
NaN	NaN	-12.9819	0.35955	-28.1404	11.7348
NaN	NaN	-12.7155	0.3672	-27.8138	8.71388
NaN	0.176002	-12.4993	0.37485	-25.5614	6.26185
NaN	0.176056	-12.3881	0.3825	-21.7841	5.24271
NaN	0.176104	-12.3925	0.39015	-16.895	5.82137
NaN	0.176118	-12.5528	0.3978	-11.4541	7.5921
NaN	0.176081	-12.8237	0.40545	-6.35093	9.86956
NaN	0.175975	-13.138	0.4131	-2.48071	11.8834
NaN	0.175818	-13.3788	0.42075	-0.24492	12.99
NaN	0.175625	-13.4631	0.4284	0.507041	12.9392
NaN	0.175435	-13.4294	0.43605	0.261306	11.9798
NaN	0.175284	-13.3739	0.4437	-0.329999	10.7199
NaN	0.17519	-13.3735	0.45135	-0.598628	9.8509
NaN	0.17515	-13.4429	0.459	0.00511481	9.84738
NaN	0.175158	-13.5889	0.46665	1.78844	10.783
NaN	0.175202	-13.8187	0.4743	4.66225	12.359
NaN	0.175278	-14.1558	0.48195	7.98833	14.059
NaN	0.175379	-14.5926	0.4896	10.5709	15.2997
NaN	0.175505	-15.1232	0.49725	11.0364	15.5292
NaN	0.175652	-15.7037	0.5049	8.47843	14.2586
NaN	0.175823	-16.3091	0.51255	2.8543	11.0788
NaN	0.176012	-16.917	0.5202	-5.0082	5.78617
NaN	0.176211	-17.5242	0.52785	-13.5498	-1.35054
10.2214	0.176407	-18.1413	0.5355	-20.8118	-9.38972
9.41506	0.176593	-18.7869	0.54315	-25.1805	-16.8585
8.64601	0.17676	-19.4788	0.5508	-26.1442	-22.2395
7.91706	0.176903	-20.2404	0.55845	-24.2676	-24.5078
7.24561	0.177019	-21.0837	0.5661	-20.4513	-23.4463
6.58918	0.177115	-22.03	0.57375	-15.4546	-19.6535
5.82818	0.177206	-23.0928	0.5814	-10.0689	-14.2656
5.04752	0.177298	-24.2667	0.58905	-5.31765	-8.51023
4.23806	0.177387	-25.5356	0.5967	-2.13939	-3.27049
3.43515	0.17746	-26.8726	0.60435	-0.777766	1.15297
2.62745	0.177506	-28.2662	0.612	-0.648757	4.92235
1.78917	0.177529	-29.7197	0.61965	-0.957969	8.27259
0.892364	0.177539	-31.2984	0.6273	-1.29047	11.2264
-0.0308842	0.177546	-33.0368	0.63495	-1.58302	13.6169
-0.858614	0.177553	-35.0198	0.6426	-1.78159	15.232
-1.51496	0.17757	-37.2304	0.65025	-1.62844	15.9308
-2.23165	0.177624	-39.7414	0.6579	-0.731396	15.7479
-2.84377	0.177733	-42.5232	0.66555	1.16065	14.9091
-3.24264	0.177925	-45.5855	0.6732	3.88448	13.6955
-3.61183	0.178185	-48.8063	0.68085	6.84845	12.27
-3.75902	0.17848	-52.0204	0.6885	9.3778	10.6032
-3.76129	0.178751	-54.963	0.69615	11.1169	8.53857
-3.60872	0.178942	-57.317	0.7038	12.0101	5.9356
-3.27988	0.179011	-58.7229	0.71145	11.9042	2.76176
-2.90862	0.178942	-58.893	0.7191	10.4173	-0.955602
-2.32851	0.178702	-57.4941	0.72675	7.30431	-5.19746
-1.70347	0.178269	-54.5461	0.7344	2.72645	-9.87341
-1.15582	0.177608	-50.0628	0.74205	-2.90338	-14.661
-0.614781	0.176784	-44.6038	0.7497	-8.95182	-18.9406
-0.207516	0.175871	-38.7282	0.75735	-14.266	-21.9281
0.0023579	0.174989	-33.1523	0.765	-17.3582	-22.9663
				-17.3146	-21.7664
				-14.3811	-18.4711
				-9.71724	-13.6195
				-4.92053	-8.04281
				-1.49597	-2.59203
				-0.100771	2.18191
				-0.1578	6.07053
				-0.349516	8.95699
				0.420466	10.6288
				2.33183	10.8469
				4.8049	9.51809
				7.33648	6.8417
				9.85216	3.39434
				12.1455	0.00986844
				13.5915	-2.58419
				13.8776	-4.11274
				13.7555	-4.78502
				14.6659	-4.9905
				17.4856	-4.98961
				21.6452	-4.91724
				25.4415	-4.96274
				27.157	-5.41281
				25.9485	-6.5245
				21.9007	-8.37654
				15.6534	-10.7982
				8.30968	-13.3913
				1.3874	-15.6336
				-3.7187	-17.0226
				-6.33003	-17.1778
				-6.56232	-15.865
				-5.06748	-12.9863
				-2.72783	-8.61375
				-0.343096	-3.10138
				1.62784	2.87018
				3.10714	8.46486
				4.13326	12.992
				4.5698	16.1152
				4.16429	17.8269
				2.86723	18.2667
				1.06733	17.5865
				-0.420292	15.9899
				-0.701504	13.8581
				0.509718	11.7115
				2.40818	9.94295
				3.55776	8.59363
				2.93908	7.43527
				0.350733	6.25214
				-4.03953	5.01666
				-9.9018	3.87925
				-16.3847	3.10484
				-22.1896	2.95847
				-26.3416	3.46095
				-28.5874	4.24513
				-29.0076	4.80121
				-27.7007	4.83251
				-24.913	4.32311
				-21.0693	3.43029
				-16.5741	2.39157
				-11.7287	1.41461
				-6.79596	0.579658
				-2.00429	-0.144249
				2.47191	-0.807625
				6.3145	-1.43468
				8.80588	-2.02201
				9.12569	-2.53169
				7.16964	-2.9272
				3.92128	-3.24076
				0.838063	-3.53014
				-1.05752	-3.74111
				-1.54453	-3.67052
				-1.04985	-3.07353
				-0.310385	-1.81002
				0.0848566	0.0501724
				0.157526	2.22601
				0.618755	4.35222
				2.31096	6.13776
				5.44115	7.41003
				9.43869	8.06081
				13.6287	7.97937
				17.9101	6.97997
				22.6196	4.88798
				27.9142	1.85523
				33.5643	-1.53174
				39.0932	-4.58473
				43.7361	-6.86023
				46.4983	-8.22881
				46.583	-8.83709
				43.6048	-9.06291
				37.3435	-9.38354
				27.7388	-10.1733
				15.4063	-11.5251
				1.98814	-13.1697
				-10.3106	-14.5764
				-19.7601	-15.2689
				-25.7259	-15.2096
				-28.296	-14.9016
				-27.5672	-14.9593
				-23.5583	-15.5013
				-16.7865	-16.0023
				-8.70047	-15.7278
				-1.41084	-14.2842
				2.97042	-11.7904
				2.91781	-8.65793
				-1.99749	-5.31595
				-10.8137	-2.08467
				-21.4454	0.835812
				-31.3706	3.36479
				-38.372	5.56032
				-41.2235	7.53756
				-40.1436	9.23799
				-36.484	10.306
				-31.4681	10.3415
				-25.0514	9.32769
				-16.2433	7.76291
				-4.62847	6.37605
				8.52412	5.67864
				20.6005	5.66567
				28.9874	5.87195
				32.2537	5.78211
				30.4449	5.32121
				24.6269	4.96951
				16.1786	5.31511
				6.18171	6.52406
				-4.84275	8.29726
				-16.5585	10.2231
				-28.0743	12.0655
				-37.8358	13.6837
				-44.3193	14.6552
				-46.5881	14.1649
				-44.3803	11.5702
				-38.0493	7.07768
				-28.3925	1.72863
				-16.3532	-3.20227
				-2.76291	-6.83555
				11.6986	-9.06779
				26.2033	-10.4602
				39.3764	-11.606
				49.39	-12.5304
				54.7444	-12.6714
				55.1547	-11.3829
				51.745	-8.46201
				46.3213	-4.32793
				40.1889	0.148906
				33.4563	4.02259
				25.4579	6.69329
				15.6888	8.16278
				4.24141	8.93541
				-8.24437	9.65527
				-20.5965	10.8601
				-31.1526	12.9543
				-38.1111	16.0987
				-39.9642	20.0515
				-35.796	24.2852
				-25.6953	28.2266
				-11.1815	31.286
				4.92966	32.8169
				19.2946	32.2617
				28.9769	29.3967
				32.3222	24.4183
				29.6022	17.7907
				22.8677	10.0157
				14.8652	1.50136
				7.66056	-7.4374
				1.77892	-16.4983
				-3.43567	-25.2844
				-8.46448	-33.2441
				-12.7019	-39.728
				-14.8529	-44.0919
				-13.8786	-45.7426
				-9.44552	-44.2365
				-1.80965	-39.4809
				8.32812	-31.8157
				19.7455	-21.9976
				30.6217	-11.2801
				38.7492	-1.34129
				42.1602	6.18201
				40.0584	10.2209
				33.2914	10.4963
				23.6172	7.47464
				12.5222	2.2028
				0.793732	-3.99635
				-11.3035	-9.86516
				-23.8162	-14.3369
				-36.8573	-16.5558
				-50.2204	-16.1034
				-62.9987	-13.2692
				-73.6411	-8.98909
				-80.7074	-4.46171
				-83.8429	-0.634216
				-83.9687	2.21291
				-82.3915	4.43351
				-79.8811	6.54154
				-76.6042	8.80961
				-72.4928	11.2534
				-67.519	13.7792
				-61.8186	16.2197
				-55.4903	18.3161
				-48.2307	19.7845
				-39.4041	20.432
				-28.5893	20.2165
				-16.0534	19.2237
				-2.75228	17.6101
				9.99549	15.54
				20.8847	13.1516
				29.1652	10.5979
				35.1706	8.04807
				40.1067	5.61334
				45.1059	3.35813
				50.5032	1.35539
				55.8671	-0.359027
				60.4383	-1.83408
				63.5322	-3.16437
				64.8042	-4.41744
				64.3669	-5.54428
				62.6119	-6.36377
				59.8589	-6.74914
				56.3239	-6.85088
				52.3237	-7.05537
				48.1706	-7.73593
				43.939	-9.05757
				39.6104	-10.8698
				35.386	-12.7077
				31.7226	-14.0207
				29.1021	-14.4671
				27.7351	-13.9941
				27.4208	-12.7529
				27.7397	-11.0151
				28.3131	-9.07263
				28.7772	-7.13572
				28.7676	-5.36789
				28.0828	-3.97916
				26.5699	-3.12785
				23.9108	-2.73921
				19.9515	-2.5821
				15.1561	-2.49712
				10.3795	-2.41472
				6.23823	-2.23917
				2.88877	-1.89705
				0.214696	-1.45948
				-2.03474	-1.10593
				-4.08544	-1.01616
				-5.91034	-1.3114
				-7.37387	-1.99857
				-8.58568	-2.94872
				-9.74711	-3.94449
				-10.7905	-4.70806
				-11.5693	-4.93705
				-12.1639	-4.42883
				-12.7319	-3.19203
				-13.3722	-1.46402
				-14.2518	0.381604
				-15.5999	2.06892
				-17.5469	3.57924
				-20.047	5.00027
				-22.8774	6.29498
				-25.7096	7.31463
				-28.2975	7.98878
				-30.5238	8.40873
				-32.149	8.69266
				-32.7671	8.87821
				-32.2056	9.02443
				-30.6978	9.24976
				-28.5783	9.5397
				-26.1403	9.64804
				-23.7476	9.29229
				-21.6961	8.39392
				-20.0241	7.14515
				-18.6859	5.9084
				-17.7328	4.96911
				-17.1963	4.32806
				-16.9365	3.79535
				-16.609	3.22652
				-15.7365	2.55275
				-13.9735	1.6894
				-11.4258	0.61833
				-8.55495	-0.489457
				-5.72971	-1.39704
				-3.06503	-1.99308
				-0.644228	-2.27741
				1.33013	-2.22708
				2.58714	-1.7818
				2.93523	-1.00303
				2.43257	-0.127198
				1.39602	0.646899
				0.210037	1.30866
				-0.783895	1.91689
				-1.21953	2.45263
				-0.67777	2.8236
				1.24407	2.97106
				4.75717	2.96704
				9.56379	2.95878
				14.791	2.97061
				19.437	2.83449
				22.838	2.38421
				24.7691	1.66245
				25.3656	0.911693
				25.0577	0.410916
				24.4393	0.302479
				23.8939	0.522557
				23.1709	0.895408
				21.4722	1.27711
				18.0834	1.57588
				12.9408	1.71739
				6.74893	1.71697
				0.668101	1.73222
				-4.25376	1.9186
				-7.56407	2.25794
				-9.43434	2.56327
				-10.2366	2.60595
				-10.1433	2.25771
				-9.15972	1.54068
				-7.39114	0.54691
				-5.16085	-0.621929
				-2.92977	-1.82695
				-1.01064	-2.9158
				0.779422	-3.83306
				3.05727	-4.6431
				6.4267	-5.40651
				11.1278	-6.09635
				16.8934	-6.66575
				22.953	-7.15118
				28.2259	-7.64935
				31.5741	-8.19724
				32.0111	-8.75174
				29.0689	-9.25929
				23.1847	-9.63219
				15.3828	-9.66421
				6.26474	-9.06758
				-4.48807	-7.67725
				-17.4299	-5.65164
				-32.231	-3.41957
				-47.1877	-1.37555
				-59.7662	0.353317
				-67.8267	1.85424
				-70.6482	3.21135
				-69.0143	4.34668
				-64.4339	5.06177
				-58.3119	5.20373
				-51.5947	4.7336
				-44.6642	3.71786
				-37.4249	2.39573
				-29.928	1.21436
				-23.1362	0.632351
				-18.7845	0.813727
				-18.227	1.55455
				-21.3791	2.47652
				-26.6665	3.22727
				-31.8319	3.60314
				-34.7972	3.61396
				-34.0295	3.38259
				-28.6363	2.93006
				-18.6552	2.13761
				-5.43294	0.943331
				8.54181	-0.491406
				20.635	-1.81731
				29.2063	-2.68027
				33.9146	-2.88486
				35.1436	-2.42162
				33.4212	-1.46224
				29.273	-0.400452
				23.1411	0.293416
				15.4081	0.450102
				6.88661	0.346784
				-0.849691	0.408563
				-5.94449	0.853042
				-6.95379	1.59215
				-3.15443	2.35451
				5.36143	2.87633
				17.6916	3.01551
				32.2238	2.76507
				46.8126	2.25595
				59.3279	1.70378
				68.5168	1.23428
				74.3956	0.796903
				77.7677	0.308722
				79.3764	-0.181331
				79.3584	-0.534889
				77.2666	-0.723556
				72.4733	-0.887451
				64.6148	-1.12521
				54.0103	-1.37122
				42.1119	-1.58167
				31.6606	-1.87675
				26.1673	-2.44217
				28.9538	-3.43501
				42.0823	-4.95379
				65.249	-6.96223
				95.2358	-9.27399
				126.842	-11.6695
				155.139	-14.0122
				177.538	-16.3057
				194.311	-18.6743
				207.292	-21.1706
				217.454	-23.5362
				222.974	-25.2384
				219.309	-25.7536
				201.015	-24.7187
				163.849	-21.865
				106.274	-17.0252
				30.437	-10.3358
				-57.6856	-2.37704
				-149.644	5.95288
				-237.124	13.7342
				-314.134	20.3398
				-377.193	25.6111
				-423.716	29.6981
				-450.73	32.6762
				-455.976	34.3717
				-440.425	34.5564
				-408.989	33.2248
				-368.371	30.6962
				-324.115	27.5254
				-279.155	24.2786
				-234.381	21.2769
				-190.194	18.5117
				-147.663	15.8245
				-108.45	13.1382
				-73.8364	10.5022
				-43.8948	7.98876
				-17.5091	5.61953
				6.99951	3.38367
				31.2677	1.2921
				56.3279	-0.629481
				82.1236	-2.42025
				107.653	-4.23015
				131.567	-6.24099
				152.481	-8.47278
				169.108	-10.651
				180.53	-12.3666
				186.285	-13.4119
				186.108	-13.8856
				179.898	-13.9757
				168.244	-13.7332
				152.716	-13.0847
				135.228	-11.9995
				117.094	-10.5724
				98.7303	-8.95792
				79.9837	-7.24219
				60.6846	-5.37706
				41.3834	-3.32448
				24.2303	-1.30086
				13.1939	0.226521
				12.6786	0.774944
				25.1015	0.0211416
				49.3028	-2.05788
				80.7039	-5.02851
				112.528	-8.07241
				137.521	-10.3269
				150.043	-11.2402
				147.563	-10.7224
				130.522	-9.00697
				101.245	-6.36969
				63.5032	-3.00138
				22.6208	0.846873
				-15.2615	4.67726
				-44.8326	7.86537
				-62.9654	9.99815
				-69.2411	11.0212
				-65.6781	11.1279
				-55.7065	10.5812
				-42.8568	9.57068
				-29.8403	8.18258
				-18.2356	6.48583
				-8.59264	4.6175
				-0.746443	2.7814
				5.77545	1.12823
				11.3859	-0.373927
				16.2669	-1.8476
				20.4385	-3.28349
				23.8732	-4.52445
				26.3729	-5.41379
				27.3818	-5.86978
				26.2681	-5.93387
				22.9172	-5.78719
				17.8838	-5.57902
				11.9527	-5.28169
				5.57034	-4.84384
				-1.42976	-4.36875
				-9.58572	-4.02739
				-19.2008	-3.89481
				-29.8267	-3.93427
				-40.2404	-4.05733
				-49.0748	-4.14138
				-55.8597	-4.04148
				-61.7586	-3.60204
				-69.3723	-2.62795
				-81.8108	-0.922801
				-101.55	1.58551
				-129.013	4.78068
				-161.213	8.32637
				-191.912	11.6393
				-213.779	14.0815
				-221.038	15.3047
				-211.243	15.335
				-185.854	14.3876
				-149.414	12.7528
				-107.487	10.7708
				-64.6424	8.73176
				-23.9983	6.75802
				12.0662	4.79906
				41.7263	2.74121
				64.2705	0.557303
				80.1936	-1.61385
				90.6487	-3.54525
				96.9479	-5.08078
				100.226	-6.20842
				101.17	-7.00543
				100.005	-7.54437
				96.6791	-7.84592
				90.9309	-7.88615
				82.4688	-7.61014
				71.6098	-6.96872
				59.8433	-6.0203
				49.3444	-4.96158
				41.3568	-3.96122
				34.4627	-2.96126
				24.15	-1.66568
				4.63231	0.267365
				-27.5639	2.96894
				-70.3526	6.20396
				-115.237	9.37556
				-149.563	11.6658
				-161.534	12.3512
				-145.941	11.2145
				-106.753	8.64864
				-54.461	5.30659
				-0.500262	1.76779
				47.078	-1.50639
				84.7168	-4.18004
				112.182	-6.12881
				130.823	-7.42486
				142.223	-8.19422
				147.501	-8.5434
				147.309	-8.59911
				142.46	-8.51926
				134.825	-8.42766
				127.639	-8.35051
				124.385	-8.25786
				126.877	-8.20769
				134.318	-8.40098
				143.974	-8.99355
				152.39	-9.85748
				156.336	-10.6336
				153.622	-11.0017
				143.949	-10.8027
				129.131	-9.99426
				111.997	-8.64769
				94.8122	-6.95355
				78.5703	-5.15822
				63.0416	-3.49144
				46.8938	-2.10503
				28.2658	-1.02464
				6.03295	-0.158349
				-19.4125	0.654004
				-46.6898	1.57873
				-74.486	2.74403
				-102.295	4.25215
				-130.458	6.14058
				-159.156	8.26461
				-186.959	10.3495
				-210.449	12.1913
				-225.589	13.6356
				-229.67	14.3907
				-222.238	14.0994
				-204.68	12.635
				-179.222	10.2155
				-148.137	7.24933
				-113.626	4.13756
				-78.2657	1.20371
				-45.3058	-1.2654
				-18.3504	-2.9982
				-0.7819	-3.78816
				4.53458	-3.50313
				-4.35416	-2.06447
				-27.3968	0.485168
				-61.48	3.87915
				-100.727	7.58465
				-138.114	10.8926
				-167.286	13.2096
				-183.92	14.3354
				-186.476	14.4302
				-176.049	13.7976
				-155.474	12.7308
				-128.249	11.402
				-97.6524	9.79304
				-66.3095	7.8078
				-36.2063	5.50631
				-8.54656	3.11984
				16.7139	0.748526
				40.7564	-1.79707
				64.787	-4.69041
				88.8279	-7.73722
				111.38	-10.4776
				130.057	-12.5462
				142.666	-13.7966
				148.162	-14.1689
				147.164	-13.6193
				141.609	-12.2078
				133.584	-10.1823
				124.347	-7.93895
				114.273	-5.86949
				103.248	-4.19311
				90.9546	-2.87058
				76.9289	-1.68765
				60.6795	-0.46081
				42.261	0.888236
				23.0114	2.39704
				5.95288	3.99609
				-4.23345	5.37083
				-2.23235	6.01907
				15.2378	5.50848
				46.5472	3.7293
				84.715	0.989472
				119.995	-2.00403
				143.7	-4.29516
				151.134	-5.08273
				142.325	-4.10599
				120.741	-1.63049
				91.4496	1.76252
				59.7141	5.27094
				29.9602	8.01703
				5.09769	9.37276
				-13.5663	9.19529
				-26.0183	7.78641
				-33.1293	5.71018
				-36.2071	3.5703
				-36.7058	1.76916
				-36.0612	0.418546
				-35.3191	-0.536867
				-34.7133	-1.18968
				-33.6942	-1.63971
				-31.4115	-2.01593
				-27.0249	-2.52529
				-19.4308	-3.45676
				-7.09167	-5.06212
				11.1489	-7.37833
				34.6979	-10.1227
				60.5268	-12.7514
				83.7928	-14.7271
				99.4885	-15.8355
				104.32	-16.2266
				97.7896	-16.1555
				81.913	-15.7555
				60.2097	-15.0739
				36.7772	-14.2214
				15.298	-13.3288
				-2.15999	-12.3084
				-15.8364	-10.7921
				-27.7372	-8.43208
				-40.0809	-5.25447
				-53.872	-1.70837
				-68.5969	1.63221
				-82.9201	4.43839
				-95.4042	6.69844
				-104.66	8.46753
				-109.197	9.60561
				-107.431	9.76106
				-98.1296	8.65537
				-81.2494	6.43611
				-58.6572	3.74979
				-34.1923	1.46596
				-12.9514	0.238676
				0.173363	0.210296
				2.44649	1.11642
				-5.33114	2.60767
				-19.1057	4.36716
				-33.2998	6.01712
				-42.9316	7.11485
				-45.3372	7.33112
				-41.0781	6.65541
				-33.6741	5.43658
				-28.0086	4.23577
				-28.0051	3.61623
				-34.8873	3.89151
				-47.1492	4.93092
				-62.1673	6.29331
				-78.0022	7.59897
				-93.9011	8.73937
				-109.531	9.81696
				-123.952	10.9677
				-134.98	12.1974
				-139.321	13.3251
				-133.727	14.0316
				-116.577	13.96
				-88.6792	12.8711
				-52.8111	10.798
				-12.8025	8.04459
				26.9825	5.01748
				61.9988	2.08697
				88.3125	-0.416696
				103.726	-2.18333
				108.403	-2.99945
				104.467	-2.89158
				94.8987	-2.17908
				82.441	-1.3347
				69.2082	-0.75666
				57.1922	-0.660089
				48.7359	-1.14322
				46.0131	-2.24258
				49.7514	-3.8773
				58.0186	-5.80872
				65.8141	-7.61614
				66.3653	-8.66827
				54.4133	-8.3339
				29.716	-6.42601
				-2.04234	-3.39691
				-31.7223	-0.0820777
				-50.7148	2.68571
				-54.1259	4.35038
				-41.9504	4.74189
				-18.2451	3.96703
				10.974	2.23879
				40.0838	-0.140518
				65.1601	-2.72857
				83.6986	-5.00306
				93.851	-6.56338
				94.3571	-7.33381
				84.9576	-7.51153
				66.6455	-7.25578
				41.7219	-6.55242
				13.6307	-5.46265
				-13.7687	-4.2991
				-37.2628	-3.41518
				-54.8585	-2.9254
				-65.6608	-2.66603
				-69.66	-2.34914
				-67.7339	-1.74277
				-61.4667	-0.772415
				-52.6221	0.482917
				-42.6918	1.86687
				-32.6404	3.19276
				-22.621	4.2135
				-11.9839	4.59681
				-0.136774	4.03581
				12.3128	2.51524
				23.536	0.447865
				31.8768	-1.58328
				37.3142	-3.22428
				41.7325	-4.4708
				48.1153	-5.48702
				59.4349	-6.43109
				77.6155	-7.45492
				102.541	-8.69776
				131.24	-10.1714
				157.998	-11.7232
				176.167	-13.1085
				180.888	-14.0199
				170.626	-14.1421
				146.68	-13.3044
				111.825	-11.5369
				69.1976	-8.96861
				22.0165	-5.775
				-25.7746	-2.2761
				-69.1229	0.995986
				-103.229	3.52671
				-126.106	5.21792
				-139.935	6.43806
				-149.589	7.62541
				-159.38	8.96237
				-170.5	10.4036
				-180.614	11.8228
				-185.286	13.0619
				-180.425	13.886
				-164.779	13.9806
				-140.918	13.1314
				-113.74	11.4702
				-87.9537	9.50244
				-66.6018	7.82293
				-50.6655	6.74767
				-39.1029	6.20806
				-29.5209	5.9225
				-19.3416	5.53894
				-6.62865	4.70086
				9.94006	3.18155
				31.6367	0.957856
				59.7413	-1.85788
				94.442	-5.03054
				133.397	-8.16996
				171.351	-10.8177
				201.15	-12.5674
				215.724	-13.1399
				210.726	-12.4642
				186.7	-10.7067
				149.092	-8.21724
				106.089	-5.45169
				65.8584	-2.85669
				34.2217	-0.760466
				13.2659	0.668736
				1.37681	1.44317
				-5.59333	1.742
				-12.4906	1.84901
				-22.6754	2.08876
				-36.7178	2.71735
				-52.9732	3.77023
				-68.8762	5.00929
				-81.3542	5.99579
				-86.9158	6.22334
				-82.761	5.34435
				-68.4876	3.41509
				-46.9033	0.933472
				-23.4275	-1.37129
				-4.57083	-2.88519
				3.94348	-3.44154
				-0.712527	-3.35328
				-16.3804	-3.08119
				-35.3203	-2.95145
				-46.8827	-3.17429
				-42.9697	-3.90335
				-22.9044	-5.156
				6.03403	-6.72797
				32.9583	-8.19234
				49.1474	-9.00485
				50.8897	-8.70803
				38.3853	-7.0892
				13.5987	-4.2077
				-20.1862	-0.347534
				-57.2654	4.01588
				-89.0235	8.14911
				-105.98	11.0972
				-101.998	12.0986
				-77.9202	11.0854
				-41.7888	8.79321
				-5.15877	6.3654
				22.2367	4.61112
				36.2255	3.50807
				38.5309	2.53101
				34.2389	1.40411
				28.2786	0.399652
				22.608	0.0329447
				15.2196	0.654581
				1.44011	2.30151
				-23.1856	4.78337
				-60.0048	7.82641
				-105.817	11.1582
				-153.653	14.511
				-195.232	17.5369
				-223.416	19.7399
				-233.518	20.6184
				-223.93	19.9578
				-196.506	17.9746
				-156.115	15.1788
				-109.157	12.1055
				-61.841	9.1145
				-18.8974	6.34174
				17.0794	3.80346
				45.6326	1.5062
				67.783	-0.553537
				85.0539	-2.37468
				98.7645	-3.92163
				109.78	-5.20954
				118.511	-6.3566
				124.919	-7.44512
				128.63	-8.39167
				129.409	-9.03719
				127.577	-9.3019
				123.817	-9.18298
				118.689	-8.71946
				112.421	-8.09635
				104.978	-7.6646
				96.1767	-7.66474
				85.8606	-7.97312
				74.1958	-8.23459
				61.7982	-8.18875
				49.4065	-7.7925
				37.5031	-7.10781
				26.3718	-6.21305
				16.3024	-5.23093
				7.47474	-4.31449
				-0.315144	-3.57771
				-7.72015	-3.06858
				-15.6349	-2.69559
				-24.8163	-2.17872
				-35.5413	-1.25238
				-47.3667	0.0687109
				-58.8034	1.46276
				-67.2008	2.46887
				-69.3313	2.73143
				-62.3288	2.14433
				-44.5402	0.719589
				-16.5172	-1.55445
				18.1085	-4.54686
				52.9669	-7.77039
				80.9608	-10.5103
				97.0411	-12.1976
				100.264	-12.6781
				94.1861	-12.2557
				85.5721	-11.5506
				81.7777	-11.1922
				87.522	-11.4911
				102.511	-12.3431
				121.541	-13.4081
				137.233	-14.3569
				143.52	-14.9336
				137.696	-14.8524
				120.557	-13.8408
				95.6061	-11.9081
				67.9928	-9.45489
				43.0843	-7.00359
				24.9264	-4.87573
				15.5957	-3.15681
				15.5605	-1.86612
				24.061	-1.09282
				39.0682	-0.980971
				56.9811	-1.57688
				72.6112	-2.67596
				80.6108	-3.82882
				78.1242	-4.55377
				66.3402	-4.60989
				49.578	-4.08164
				33.0786	-3.21963
				21.1856	-2.26318
				16.1755	-1.42211
				17.2662	-0.868783
				20.3889	-0.578162
				19.8746	-0.252925
				11.5313	0.430687
				-5.17731	1.54486
				-27.3673	2.94046
				-50.7027	4.44207
				-71.5597	5.94167
				-88.4147	7.37649
				-102.086	8.7238
				-114.845	10.0502
				-128.909	11.4898
				-145.258	13.1267
				-163.232	14.9197
				-180.657	16.7231
				-194.62	18.3412
				-203.239	19.6237
				-207.479	20.6349
				-211.07	21.6827
				-218.065	22.9992
				-229.603	24.393
				-242.105	25.336
				-248.369	25.3782
				-241.141	24.4115
				-217.088	22.5935
				-178.717	20.1892
				-133.189	17.4872
				-89.2945	14.7113
				-54.6967	12.0521
				-34.319	9.84676
				-29.5877	8.53143
				-38.4163	8.30918
				-55.9152	8.95086
				-75.4802	9.89969
				-90.3	10.5304
				-95.3889	10.4085
				-89.2036	9.40862
				-73.6696	7.67504
				-52.547	5.51648
				-29.2997	3.26316
				-6.00597	1.16279
				16.3092	-0.613056
				36.886	-1.98588
				54.9012	-3.06202
				69.7736	-4.12113
				81.6844	-5.45587
				91.6558	-7.19788
				100.937	-9.23977
				110.151	-11.3131
				118.843	-13.1431
				125.628	-14.5234
				128.788	-15.3182
				127.256	-15.4845
				121.395	-15.0973
				112.905	-14.3138
				103.967	-13.3101
				96.3921	-12.276
				91.2879	-11.4346
				88.9695	-10.9607
				88.8218	-10.8502
				89.5113	-10.9339
				89.7107	-11.0557
				88.6746	-11.1951
				86.1875	-11.3554
				82.1626	-11.4049
				76.5074	-11.1654
				69.5223	-10.616
				62.2271	-9.86849
				55.9198	-8.96427
				51.467	-7.87798
				49.1522	-6.7159
				48.7887	-5.68255
				49.622	-4.84427
				50.4453	-4.0965
				50.0951	-3.31075
				47.7962	-2.42469
				43.3483	-1.49471
				37.3478	-0.71611
				30.9683	-0.317086
				25.1682	-0.384196
				20.03	-0.757506
				14.8548	-1.08652
				9.01611	-1.06511
				2.88303	-0.667768
				-2.11986	-0.148494
				-4.46665	0.179761
				-3.56896	0.164114
				0.000780183	-0.12468
				5.00411	-0.490891
				10.1441	-0.777776
				14.4951	-0.936934
				17.6667	-0.959939
				19.6555	-0.828493
				20.596	-0.567976
				20.6097	-0.293249
				19.742	-0.133764
				17.9632	-0.0751896
				15.233	0.0910898
				11.6964	0.55324
				7.92191	1.17798
				4.81061	1.55631
				3.11232	1.41555
				3.06961	0.852047
				4.66357	0.134586
				8.23155	-0.578524
				14.7751	-1.33333
				25.5255	-2.29705
				40.9011	-3.57602
				59.683	-5.07266
				79.2379	-6.49913
				96.3566	-7.52288
				107.842	-7.93437
				111.282	-7.69033
				106.227	-6.8218
				94.2352	-5.3987
				77.2696	-3.60795
				56.534	-1.76263
				33.1258	-0.137079
				9.1828	1.19771
				-12.2238	2.30163
				-28.5769	3.17365
				-39.539	3.74566
				-47.5636	4.03105
				-57.2677	4.18616
				-73.7444	4.44839
				-100.444	5.07364
				-138.124	6.30888
				-185.505	8.33985
				-240.197	11.2007
				-298.63	14.7318
				-355.612	18.6254
				-404.207	22.4301
				-436.332	25.5091
				-444.6	27.1741
				-425.037	26.9904
				-379.172	24.9926
				-314.235	21.6772
				-241.176	17.739
				-171.289	13.7322
				-113.061	10.0151
				-70.4363	6.93005
				-42.5169	4.78585
				-24.4089	3.55525
				-8.95771	2.71914
				11.0885	1.54921
				40.6547	-0.438942
				80.0346	-3.21306
				124.255	-6.23823
				165.219	-8.77466
				195.413	-10.2651
				210.787	-10.5179
				211.512	-9.68144
				200.954	-8.18675
				183.869	-6.63027
				164.56	-5.51333
				145.65	-5.02738
				127.938	-5.07905
				111.088	-5.4198
				94.5088	-5.73605
				78.4698	-5.82815
				65.4749	-5.833
				60.4857	-6.17636
				68.8742	-7.26774
				93.2882	-9.2559
				131.581	-11.9698
				176.965	-14.9689
				220.297	-17.6723
				253.438	-19.5767
				272.106	-20.4595
				276.768	-20.4426
				271.452	-19.8856
				261.85	-19.1381
				253.708	-18.3558
				251.113	-17.5655
				254.284	-16.7934
				258.224	-16.0028
				254.42	-14.9307
				235.118	-13.0915
				196.743	-10.0322
				140.435	-5.62726
				70.6243	-0.154645
				-6.86901	5.81653
				-86.1621	11.5688
				-161.499	16.4449
				-227.137	20.1083
				-278.275	22.6172
				-312.461	24.2563
				-329.835	25.2634
				-332.184	25.5952
				-322.011	25.0006
				-302.223	23.3947
				-276.052	21.0456
				-246.494	18.4048
				-215.396	15.8862
				-183.216	13.7218
				-149.907	11.8502
				-116.136	9.94631
				-83.949	7.66188
				-56.4502	4.89344
				-36.6535	1.89249
				-26.327	-0.826314
				-25.3843	-2.76731
				-31.7916	-3.71523
				-41.9782	-3.74952
				-51.8389	-3.14661
				-57.962	-2.33958
				-58.3678	-1.85843
				-52.4933	-2.17949
				-40.9236	-3.51503
				-25.355	-5.68287
				-8.44945	-8.22651
				7.05536	-10.7049
				19.6088	-12.8684
				29.4398	-14.595
				38.2137	-15.7567
				48.1767	-16.2214
				61.1015	-15.9532
				77.3252	-15.0792
				95.3147	-13.8704
				111.789	-12.5815
				121.939	-11.2298
				119.984	-9.56412
				100.814	-7.25893
				62.5258	-4.08951
				8.43029	-0.011119
				-53.1026	4.75718
				-111.274	9.69738
				-156.334	14.0895
				-181.984	17.1998
				-186.169	18.5584
				-170.797	18.2268
				-140.632	16.7221
				-101.507	14.6027
				-58.8248	12.213
				-17.178	9.74913
				19.4466	7.3448
				47.8437	5.09306
				66.3029	3.07553
				75.0059	1.36797
				75.5612	0.0592131
				70.3475	-0.710647
				62.19	-0.843337
				53.8701	-0.475243
				47.2794	0.0370612
				42.936	0.401731
				40.3151	0.613254
				38.5294	0.892522
				36.7702	1.44457
				34.4472	2.25453
				31.1516	3.1319
				26.5117	3.94601
				20.1693	4.73385
				12.032	5.58427
				2.48911	6.46926
				-7.67668	7.1697
				-17.4878	7.40846
				-25.9105	7.10018
				-31.9559	6.39225
				-34.7819	5.4574
				-33.9766	4.33695
				-29.9417	2.97713
				-23.7975	1.36002
				-16.7473	-0.417173
				-9.56892	-2.15205
				-2.51672	-3.56986
				4.65394	-4.42847
				12.6691	-4.7139
				22.4653	-4.68692
				34.571	-4.69868
				48.722	-5.03809
				64.1726	-5.9144
				80.2996	-7.42075
				96.9936	-9.44324
				114.598	-11.6684
				133.06	-13.7787
				150.642	-15.6031
				163.57	-16.9577
				167.361	-17.4523
				158.954	-16.6808
				138.265	-14.589
				108.284	-11.5915
				73.7943	-8.36997
				39.6675	-5.50341
				9.65948	-3.20102
				-14.3237	-1.3564
				-32.5478	0.224457
				-46.8471	1.67675
				-58.8279	3.0182
				-67.7982	4.06195
				-70.2624	4.35322
				-61.7398	3.36777
				-39.4371	0.926506
				-3.93899	-2.64016
				40.5233	-6.74655
				86.8955	-10.8425
				127.063	-14.4585
				154.166	-17.1176
				164.376	-18.3484
				157.262	-17.8942
				135.165	-15.91
				102.463	-12.8924
				64.7175	-9.43583
				27.3867	-6.0375
				-5.42313	-3.00198
				-31.4125	-0.447496
				-50.0031	1.6266
				-62.3476	3.31062
				-71.1299	4.77395
				-79.5025	6.18797
				-89.5843	7.59363
				-101.571	8.84371
				-113.896	9.7354
				-124.34	10.216
				-131.626	10.4409
				-136.656	10.715
				-142.582	11.4249
				-153.357	12.8544
				-171.117	14.8861
				-193.818	16.9278
				-214.981	18.2544
				-226.44	18.44
				-222.999	17.4748
				-205.726	15.6466
				-180.965	13.4266
				-155.91	11.3183
				-134.629	9.64249
				-117.116	8.43194
				-100.812	7.49391
				-82.784	6.54573
				-61.295	5.37719
				-36.1949	3.95702
				-8.37102	2.38245
				20.7682	0.784985
				49.3026	-0.636814
				74.9053	-1.5774
				95.3491	-1.78091
				108.978	-1.25717
				115.021	-0.291386
				113.876	0.725943
				107.095	1.45952
				96.6386	1.7492
				83.8178	1.72679
				69.1332	1.76107
				53.3321	2.12936
				38.2159	2.77729
				26.0213	3.47098
				18.1479	4.05826
				14.6789	4.48829
				14.9592	4.66635
				18.2633	4.39273
				23.8768	3.46695
				30.8907	1.88277
				38.2166	-0.0396657
				45.0042	-1.80057
				51.1448	-3.10327
				57.3265	-4.0567
				64.5384	-4.98413
				73.3828	-6.11715
				83.6618	-7.519
				94.467	-9.22177
				104.624	-11.2643
				113.075	-13.5158
				118.88	-15.5861
				121.079	-17.0437
				118.795	-17.6936
				111.341	-17.5645
				98.0634	-16.7206
				78.3999	-15.2123
				52.5605	-13.1197
				22.1995	-10.5698
				-9.63819	-7.79851
				-39.2011	-5.13617
				-62.8998	-2.80343
				-78.1785	-0.811063
				-84.4469	0.882024
				-83.8545	2.27186
				-81.1369	3.43385
				-81.9687	4.59692
				-90.3546	5.98
				-106.567	7.57831
				-126.904	9.15979
				-145.217	10.4304
				-155.338	11.1573
				-153.541	11.2069
				-139.832	10.5656
				-117.276	9.34902
				-90.0796	7.79298
				-62.0972	6.22225
				-36.3574	4.97057
				-14.9097	4.24814
				1.42827	4.04395
				13.1591	4.18932
				21.7886	4.52088
				29.0542	4.92245
				36.0316	5.21807
				42.7645	5.12652
				48.6615	4.40604
				53.2557	3.05711
				56.7106	1.34108
				59.6069	-0.413974
				62.0531	-1.95656
				62.9417	-3.06058
				60.2122	-3.49528
				52.1013	-3.17696
				38.6406	-2.32953
				22.3465	-1.43245
				7.23873	-0.950865
				-3.25535	-1.04348
				-7.70769	-1.49803
				-6.58519	-1.95204
				-1.46273	-2.13978
				5.64638	-1.94467
				12.82	-1.38615
				18.7068	-0.655137
				22.8762	-0.0698392
				25.9161	0.064532
				29.0848	-0.434302
				33.5712	-1.55885
				39.9013	-3.074
				47.805	-4.59159
				56.3688	-5.80274
				64.3839	-6.66882
				70.7161	-7.30079
				74.4483	-7.68354
				75.1061	-7.67086
				73.1934	-7.25142
				70.4765	-6.68169
				69.4489	-6.31509
				72.1935	-6.35608
				79.3752	-6.78291
				89.8387	-7.45413
				100.779	-8.2285
				108.513	-8.95021
				109.905	-9.38336
				103.782	-9.27938
				91.3702	-8.56291
				75.7056	-7.43469
				60.7949	-6.27497
				50.4889	-5.44569
				46.8021	-5.13018
				48.6368	-5.25373
				51.7818	-5.51005
				49.8982	-5.47005
				36.353	-4.66865
				7.08185	-2.72241
				-36.4121	0.390437
				-86.1011	4.08851
				-130.02	7.34566
				-157.365	9.23584
				-163.311	9.43329
				-150.979	8.27052
				-129.416	6.35962
				-108.7	4.19872
				-95.4419	2.18353
				-91.7309	0.837767
				-97.3128	0.751128
				-111.913	2.2468
				-135.437	5.17519
				-166.318	8.97404
				-199.613	12.905
				-227.025	16.2905
				-240.065	18.5763
				-234.237	19.3111
				-211.001	18.2987
				-176.641	15.8675
				-139.241	12.8744
				-105.147	10.2854
				-76.4384	8.61187
				-50.7921	7.59255
				-24.086	6.3927
				5.44906	4.31274
				33.9772	1.52475
				52.5159	-0.850223
				51.7878	-1.49951
				28.283	0.140095
				-12.7599	3.55062
				-59.085	7.53741
				-96.6466	10.9122
				-115.572	12.9388
				-113.598	13.3577
				-95.2536	12.2171
				-68.0398	9.78952
				-38.4336	6.56702
				-9.86874	3.17172
				17.1586	0.159525
				43.9774	-2.17578
				72.2972	-3.88803
				102.8	-5.29502
				134.507	-6.77394
				165.048	-8.5112
				191.322	-10.3221
				210.456	-11.7735
				220.987	-12.5808
				223.413	-12.8215
				219.406	-12.7049
				210.409	-12.2559
				197.151	-11.3493
				180.263	-9.97628
				160.98	-8.32845
				141.301	-6.64438
				123.545	-5.11638
				109.559	-3.9586
				100.398	-3.42807
				96.6086	-3.6824
				98.2007	-4.61482
				103.806	-5.83809
				109.93	-6.84597
				111.272	-7.25029
				102.167	-6.89607
				78.7357	-5.75086
				41.1487	-3.80014
				-5.17017	-1.18434
				-50.5731	1.63953
				-84.6895	4.00756
				-100.997	5.33649
				-99.8244	5.36295
				-88.0325	4.27351
				-75.8228	2.68474
				-72.4003	1.37725
				-82.5333	0.916923
				-105.573	1.47834
				-136.82	2.92751
				-169.856	4.97556
				-198.749	7.28437
				-219.477	9.48707
				-229.95	11.1247
				-228.971	11.6751
				-215.683	10.7911
				-190.086	8.499
				-153.631	5.13384
				-109.289	1.14147
				-61.302	-3.02814
				-14.6675	-6.91189
				25.6907	-10.0633
				55.9016	-12.1651
				74.1128	-13.1052
				81.153	-12.9942
				80.1623	-12.1646
				75.0181	-11.0715
				68.7726	-10.0656
				63.2521	-9.2404
				59.376	-8.51508
				57.3682	-7.81599
				57.065	-7.15524
				58.3861	-6.58462
				61.2511	-6.12999
				64.9325	-5.78292
				67.7915	-5.47253
				67.9527	-4.9858
				64.5666	-4.04611
				58.6018	-2.59305
				52.3299	-0.955657
				47.9966	0.295411
				46.7137	0.721834
				47.9843	0.325512
				50.0532	-0.491114
				51.0894	-1.27759
				50.3551	-1.81698
				48.308	-2.054
				45.8041	-1.90013
				43.4266	-1.28504
				41.2434	-0.343181
				38.7212	0.615964
				34.9513	1.39371
				29.2445	2.13314
				21.4449	3.18039
				11.6844	4.72027
				0.176536	6.62858
				-12.6193	8.59726
				-25.9042	10.2953
				-38.9349	11.5168
				-51.5801	12.2719
				-64.2248	12.6867
				-76.8517	12.8391
				-88.3403	12.7755
				-96.8601	12.631
				-100.852	12.6008
				-99.7502	12.7681
				-94.1682	12.9934
				-85.5597	13.0144
				-75.6206	12.6706
				-65.8361	11.9965
				-57.2666	11.1318
				-50.5025	10.204
				-45.6595	9.26481
				-42.2536	8.30449
				-38.9881	7.31284
				-33.7719	6.26662
				-24.2143	5.02476
				-8.34599	3.28854
				14.8074	0.769166
				44.7294	-2.5307
				79.1042	-6.21068
				114.338	-9.67262
				146.807	-12.4457
				173.585	-14.3739
				191.935	-15.5215
				198.704	-15.8856
				191.398	-15.2974
				170.846	-13.7458
				142.468	-11.6889
				113.644	-9.82916
				89.1484	-8.59426
				69.0273	-7.92459
				50.4418	-7.49521
				31.0078	-6.98705
				10.5687	-6.18235
				-9.09461	-5.04363
				-25.5203	-3.78683
				-37.224	-2.78619
				-45.0389	-2.36305
				-51.9403	-2.57977
				-61.2835	-3.1589
				-75.0169	-3.63277
				-93.4087	-3.53039
				-115.814	-2.47134
				-140.884	-0.34621
				-166.116	2.53045
				-187.966	5.56213
				-202.794	8.15646
				-207.899	9.90567
				-202.177	10.6381
				-186.482	10.3876
				-163.652	9.33582
				-138.08	7.81787
				-114.643	6.33902
				-96.9946	5.37915
				-85.6937	5.07499
				-77.4646	5.15886
				-66.7491	5.17592
				-49.0201	4.71837
				-23.7881	3.57867
				4.73109	1.83746
				30.2185	-0.170027
				48.7521	-2.0711
				61.5037	-3.70763
				73.2366	-5.1916
				88.376	-6.78419
				108.309	-8.76324
				131.486	-11.3081
				154.98	-14.3499
				175.649	-17.4871
				190.345	-20.1022
				195.758	-21.5822
				188.438	-21.4641
				165.068	-19.4757
				123.56	-15.5468
				65.5671	-9.88995
				-1.13237	-3.1398
				-63.1952	3.59641
				-106.115	8.97851
				-120.466	11.9959
				-106.211	12.4575
				-71.9594	10.9696
				-29.8588	8.50649
				9.70061	6.01005
				40.2906	4.21059
				58.9604	3.51304
				65.4676	3.86135
				62.2086	4.75689
				53.7461	5.55729
				45.304	5.87565
				40.9419	5.7552
				42.1066	5.50122
				46.959	5.36702
				50.4201	5.42587
				44.5117	5.80121
				19.6879	6.97254
				-31.2525	9.63216
				-107.274	14.0514
				-195.29	19.5354
				-272.468	24.4918
				-314.759	27.1291
				-307.44	26.3462
				-251.527	22.1952
				-162.022	15.6379
				-59.9141	7.954
				35.9013	0.317498
				112.002	-6.30506
				159.607	-11.0939
				173.78	-13.4377
				155.087	-13.1728
				110.99	-10.7001
				53.7241	-6.84886
				-4.03028	-2.64334
				-52.5287	0.948994
				-86.5117	3.2551
				-105.555	4.07407
				-113.253	3.72866
				-114.979	2.89209
				-114.956	2.24747
				-114.15	2.14658
				-110.087	2.40664
				-98.6463	2.40616
				-76.6689	1.47694
				-43.7931	-0.680579
				-2.62938	-3.84259
				42.4534	-7.44749
				86.9166	-10.9281
				127.098	-13.9185
				160.665	-16.2854
				186.723	-18.0625
				205.591	-19.3141
				218.768	-20.0665
				229.267	-20.4318
				240.875	-20.6996
				255.782	-21.1547
				272.581	-21.8224
				286.482	-22.4133
				291.363	-22.4511
				282.624	-21.4779
				259.776	-19.2794
				227.089	-16.0554
				191.463	-12.403
				159.119	-9.04527
				133.193	-6.47888
				112.836	-4.8099
				93.9449	-3.83671
				71.4236	-3.20124
				41.7134	-2.45248
				3.93642	-1.07684
				-40.621	1.36357
				-89.7442	4.97635
				-141.161	9.36113
				-192.736	13.776
				-242.603	17.6331
				-289.525	20.8316
				-332.803	23.5857
				-371.374	26.0938
				-402.991	28.4181
				-424.334	30.4575
				-431.742	31.8949
				-422.226	32.2475
				-395.122	31.1141
				-353.738	28.48
				-305.163	24.7849
				-257.216	20.6809
				-214.156	16.7223
				-174.311	13.1731
				-131.403	9.9124
				-78.6476	6.47514
				-12.7749	2.32268
				64.7215	-2.80054
				148.92	-8.71584
				233.301	-14.8967
				311.314	-20.6725
				377.92	-25.4797
				430.41	-29.0285
				468.033	-31.3202
				491.377	-32.5799
				502.286	-33.1554
				503.695	-33.4181
				498.303	-33.6281
				485.643	-33.6741
				458.734	-32.8195
				404.219	-29.8006
				309.269	-23.4384
				171.595	-13.4183
				4.29178	-0.665966
				-168.106	12.8897
				-319.1	25.027
				-429.849	34.0721
				-494.426	39.3534
				-518.852	41.1443
				-515.491	40.3738
				-496.19	38.1676
				-467.684	35.3431
				-431.296	32.2199
				-385.805	28.7499
				-330.63	24.7101
				-267.393	19.9646
				-199.718	14.7446
				-131.833	9.56252
				-66.7601	4.75753
				-5.47691	0.242426
				52.1826	-4.29178
				106.125	-9.00578
				155.571	-13.684
				199.352	-17.8332
				236.191	-21.0726
				265.109	-23.4119
				285.795	-25.1179
				298.285	-26.3466
				302.19	-26.9187
				296.482	-26.522
				280.046	-25.1445
				252.604	-23.1226
				215.817	-20.7573
				173.811	-18.127
				132.081	-15.326
				94.8696	-12.653
				62.5634	-10.3535
				31.2457	-8.25436
				-5.0952	-5.83245
				-51.6375	-2.57059
				-110.84	1.83807
				-181.686	7.40939
				-259.623	13.7633
				-337.064	20.1772
				-404.708	25.8757
				-453.886	30.2669
				-479.072	32.9963
				-479.293	34.0054
				-457.831	33.554
				-420.135	32.0076
				-370.965	29.5547
				-312.952	26.1685
				-247.504	21.8488
				-176.488	16.8761
				-102.749	11.7532
				-29.6026	6.91523
				39.4353	2.63035
				100.899	-0.906425
				152.501	-3.63527
				194.302	-5.79275
				228.676	-7.85133
				259.258	-10.2376
				289.463	-13.0577
				320.947	-16.038
				352.558	-18.743
				380.26	-20.8545
				398.458	-22.2045
				402.336	-22.6137
				389.592	-21.8806
				360.713	-19.973
				318.668	-17.1337
				268.728	-13.7984
				217.633	-10.4448
				171.407	-7.49655
				133.133	-5.31261
				102.745	-4.12456
				78.8925	-3.88064
				60.7407	-4.22406
				48.0745	-4.7258
				40.32	-5.13677
				36.0388	-5.41759
				33.4537	-5.62303
				31.4297	-5.8214
				30.0745	-6.05645
				30.4709	-6.32347
				33.5627	-6.6208
				38.7184	-7.02922
				43.1179	-7.61302
				42.8495	-8.17521
				34.8018	-8.24597
				17.6099	-7.3902
				-8.40293	-5.46372
				-41.0159	-2.65671
				-75.7867	0.541635
				-107.266	3.4652
				-131.81	5.57481
				-149.591	6.80234
				-163.927	7.5936
				-179.03	8.57081
				-198.575	10.1766
				-225.263	12.5684
				-259.864	15.6614
				-300.286	19.2235
				-342.733	23.0137
				-384.191	26.8719
				-422.826	30.6617
				-455.295	34.0513
				-474.276	36.2775
				-469.945	36.3255
				-435.563	33.6525
				-372.958	28.6883
				-292.668	22.5268
				-208.713	16.3363
				-133.054	11.0413
				-72.9906	7.15663
				-30.4984	4.66009
				-1.95234	3.00674
				21.2674	1.32568
				49.8604	-1.26062
				91.7209	-5.26812
				147.772	-10.5506
				211.23	-16.3245
				270.589	-21.591
				314.449	-25.55
				336.036	-27.7296
				336.007	-28.0866
				322.343	-27.1748
				306.632	-25.959
				298.462	-25.2345
				302.059	-25.323
				317.205	-26.2674
				341.758	-27.9963
				372.397	-30.2324
				403.617	-32.3913
				427.005	-33.6373
				431.993	-33.125
				408.203	-30.2639
				349.554	-24.8352
				259.176	-17.1263
				151.409	-8.16088
				47.4996	0.395877
				-33.2785	6.94157
				-81.5674	10.7625
				-100.742	12.2572
				-103.929	12.5202
				-107.258	12.7909
				-122.62	14.0217
				-153.123	16.5439
				-193.127	19.9739
				-232.205	23.4717
				-260.29	26.1152
				-271.518	27.2119
				-265.871	26.5752
				-248.392	24.6039
				-226.361	22.0409
				-205.866	19.5975
				-189.392	17.6295
				-175.102	15.9611
				-157.989	13.9817
				-132.702	11.0563
				-96.718	7.00054
				-52.0016	2.19856
				-4.62107	-2.67367
				37.0426	-6.87253
				65.0024	-9.66789
				74.5706	-10.5865
				66.1206	-9.71259
				44.7174	-7.67133
				17.9316	-5.26421
				-6.89941	-3.0798
				-24.8901	-1.40492
				-34.6386	-0.364262
				-37.6287	0.00758068
				-36.5564	-0.239371
				-34.0404	-0.971217
				-32.4197	-1.86269
				-33.9053	-2.33248
				-40.0688	-1.79545
				-50.719	-0.0793466
				-63.2241	2.39064
				-72.9986	4.77751
				-74.8223	6.23601
				-64.4161	6.26777
				-39.9893	4.78126
				-3.17091	1.94634
				41.3702	-1.82363
				87.4566	-5.86537
				129.223	-9.52769
				162.494	-12.4378
				185.435	-14.4868
				198.493	-15.7532
				203.921	-16.4957
				205.201	-17.0602
				206.137	-17.6833
				209.441	-18.3919
				215.683	-19.0923
				223.218	-19.6831
				228.539	-20.0569
				226.881	-20.0422
				213.549	-19.3713
				185.58	-17.7435
				142.244	-14.9275
				83.5962	-10.7557
				8.64657	-5.04332
				-84.3473	2.44181
				-194.934	11.8799
				-316.496	23.1112
				-434.294	35.1798
				-528.515	45.9831
				-581.714	52.6818
				-585.769	53.1908
				-544.217	47.7111
				-469.849	38.7107
				-379.53	29.2604
				-288.722	21.3443
				-208.053	15.4835
				-142.696	11.4015
				-93.6073	8.6825
				-58.9611	6.96643
				-34.9643	5.94096
				-16.8479	5.3504
				-0.505275	4.96434
				16.2835	4.53076
				33.8885	3.82643
				51.8278	2.72134
				70.0986	1.11459
				89.9631	-1.12765
				113.288	-4.01564
				140.671	-7.23779
				169.78	-10.2405
				195.403	-12.5207
[truncated: 1,143 more rows]

## Sheet: Participant 06
MTP_moment	Plantar_Aponuerosis_Length	MTP_angle	Time	AbductorHallucis	FlexorDigitorumBrevis
NaN	NaN	-29.6475	0	67.2478	43.0584
NaN	NaN	-30.8506	0.00795	50.2171	26.715
NaN	NaN	-32.2596	0.0159	27.4496	4.59453
NaN	NaN	-33.5735	0.02385	2.41489	-20.5351
NaN	NaN	-34.444	0.0318	-21.1356	-44.9793
NaN	NaN	-34.7043	0.03975	-40.468	-66.024
NaN	NaN	-34.2473	0.0477	-54.3218	-83.1934
NaN	NaN	-33.2955	0.05565	-62.8021	-97.9403
NaN	NaN	-31.9586	0.0636	-67.1288	-112.269
NaN	NaN	-30.3634	0.07155	-69.2916	-127.748
NaN	NaN	-28.5591	0.0795	-71.4809	-145.625
NaN	NaN	-26.6145	0.08745	-75.2325	-166.865
NaN	NaN	-24.6583	0.0954	-80.7697	-191.257
NaN	NaN	-22.823	0.10335	-87.2153	-216.804
NaN	NaN	-21.1508	0.1113	-93.14	-240.468
NaN	NaN	-19.6259	0.11925	-96.6532	-259.677
NaN	NaN	-18.2896	0.1272	-95.8054	-273.404
NaN	NaN	-17.2097	0.13515	-89.8124	-282.174
NaN	NaN	-16.478	0.1431	-79.7627	-287.336
NaN	NaN	-16.021	0.15105	-68.0282	-290.272
NaN	NaN	-15.8069	0.159	-57.0668	-291.987
NaN	NaN	-15.7827	0.16695	-48.0888	-292.738
NaN	NaN	-15.8956	0.1749	-40.4649	-291.415
NaN	NaN	-16.0965	0.18285	-32.8574	-285.782
NaN	NaN	-16.2842	0.1908	-24.8846	-273.834
NaN	NaN	-16.399	0.19875	-17.342	-254.468
NaN	NaN	-16.4471	0.2067	-11.0222	-227.021
NaN	NaN	-16.4553	0.21465	-5.89444	-191.363
NaN	NaN	-16.4443	0.2226	-1.61733	-148.475
NaN	NaN	-16.422	0.23055	1.70853	-99.8292
NaN	NaN	-16.3781	0.2385	3.47011	-46.3877
NaN	NaN	-16.3102	0.24645	2.82921	11.0235
NaN	NaN	-16.2308	0.2544	-0.751887	70.811
NaN	NaN	-16.1596	0.26235	-7.01606	130.705
NaN	NaN	-16.1082	0.2703	-14.9802	188.685
NaN	NaN	-16.0906	0.27825	-23.3816	243.417
NaN	NaN	-16.1119	0.2862	-31.0154	293.746
NaN	NaN	-16.1691	0.29415	-36.7892	338.406
NaN	NaN	-16.2368	0.3021	-39.6173	376.458
NaN	NaN	-16.2909	0.31005	-38.5521	407.582
NaN	NaN	-16.312	0.318	-33.5	431.95
NaN	NaN	-16.2956	0.32595	-25.7151	450.142
NaN	NaN	-16.2319	0.3339	-17.1	462.567
NaN	NaN	-16.1134	0.34185	-9.18112	468.514
NaN	NaN	-15.9349	0.3498	-2.74513	466.745
NaN	NaN	-15.6834	0.35775	2.22331	457.645
NaN	NaN	-15.378	0.3657	6.57547	444.163
NaN	NaN	-15.0447	0.37365	11.6948	430.323
NaN	NaN	-14.7481	0.3816	18.7024	419.011
NaN	0.180522	-14.5524	0.38955	27.6162	410.692
NaN	0.180537	-14.5196	0.3975	37.3276	403.203
NaN	NaN	-14.6272	0.40545	46.6246	392.435
NaN	NaN	-14.8477	0.4134	55.0386	373.852
NaN	NaN	-15.1178	0.42135	62.4209	344.163
NaN	NaN	-15.4081	0.4293	68.1323	302.444
NaN	NaN	-15.7305	0.43725	71.0711	251.249
NaN	NaN	-16.219	0.4452	70.4293	197.09
NaN	NaN	-16.2147	0.45315	66.4056	148.242
NaN	NaN	-16.1984	0.4611	60.1833	110.769
NaN	NaN	-16.2419	0.46905	53.4122	86.0389
NaN	NaN	-16.3915	0.477	47.8176	71.1208
NaN	NaN	-16.5883	0.48495	44.6966	61.3463
NaN	NaN	-16.7223	0.4929	44.3934	53.101
NaN	NaN	-16.7219	0.50085	46.283	44.9728
NaN	NaN	-16.5442	0.5088	49.1019	37.4099
NaN	NaN	-16.2753	0.51675	51.361	31.8135
NaN	NaN	-16.0621	0.5247	51.838	29.3018
NaN	NaN	-16.0386	0.53265	50.1142	29.6767
NaN	NaN	-16.2041	0.5406	46.8195	31.2779
NaN	NaN	-16.5571	0.54855	43.2062	31.5578
10.1737	NaN	-17.0401	0.5565	40.173	27.8291
9.6945	0.179635	-17.6083	0.56445	37.4964	18.191
9.32693	0.179762	-18.2266	0.5724	34.1686	2.49937
8.93998	0.179866	-17.9763	0.58035	29.5013	-18.0374
8.42443	0.179952	-18.8536	0.5883	23.7047	-42.2862
7.82156	0.180034	-19.7007	0.59625	17.5125	-69.1485
7.13241	0.180117	-20.6363	0.6042	11.4957	-96.2279
6.38377	0.180224	-21.7915	0.61215	5.84852	-119.338
5.65069	0.180379	-23.2371	0.6201	0.70368	-133.939
4.9455	0.180618	-25.1071	0.62805	-3.61961	-137.761
4.3986	0.180927	-27.3645	0.636	-6.81949	-131.952
3.88613	0.181259	-29.9711	0.64395	-9.02189	-119.437
3.2306	0.181512	-32.7585	0.6519	-10.7535	-102.677
2.44127	0.181617	-35.5956	0.65985	-12.39	-83.465
1.59628	0.181523	-38.4458	0.6678	-13.7827	-64.0855
0.907734	0.181275	-41.3419	0.67575	-14.5473	-47.7686
0.31806	0.180919	-44.374	0.6837	-14.6482	-38.3217
-0.353632	0.180581	-47.698	0.69165	-14.5596	-39.1611
-1.09967	0.18038	-51.4595	0.6996	-14.8224	-51.6992
-1.79918	0.180403	-55.6991	0.70755	-15.4122	-74.6439
-2.35345	0.18061	-60.1236	0.7155	-15.6602	-104.889
-2.92178	0.180943	-64.2731	0.72345	-15.0767	-138.171
-3.40481	0.181279	-67.4695	0.7314	-14.0421	-168.511
-3.48406	0.181481	-68.9016	0.73935	-13.2438	-188.694
-3.13176	0.18132	-67.4793	0.7473	-12.6841	-193.942
-2.45952	0.180656	-63.0494	0.75525	-11.5328	-186.574
-1.80534	0.179364	-55.4762	0.7632	-8.70181	-176.643
-1.37862	0.177761	-46.3266	0.77115	-3.74192	-175.709
-0.843816	0.176272	-37.1894	0.7791	2.64172	-188.473
-0.344177	0.175292	-29.638	0.78705	9.12546	-211.266
-0.0645239	0.174782	-24.0019	0.795	14.4635	-237.805
				17.8244	-263.794
				19.0367	-286.454
				18.283	-302.428
				15.6753	-307.51
				11.6403	-298.341
				7.25438	-274.768
				3.69871	-242.025
				1.86244	-211.539
				2.4113	-198.109
				5.25656	-212.907
				8.94216	-255.439
				11.4028	-310.586
				11.385	-355.055
				8.85463	-369.448
				4.53425	-347.877
				-0.586813	-299.418
				-5.76954	-240.844
				-10.6412	-186.655
				-14.6674	-143.437
				-17.1854	-110.072
				-18.1081	-81.8459
				-17.9381	-54.9925
				-17.2805	-28.6291
				-16.8242	-3.67431
				-17.3575	19.6453
				-19.2396	42.3046
				-21.8576	63.3946
				-23.7604	78.2811
				-23.6759	81.85
				-21.7649	73.0008
				-19.5661	55.9445
				-18.4525	37.8013
				-18.6505	24.3712
				-19.7321	17.6557
				-21.21	16.5529
				-22.5618	18.4486
				-23.2276	20.2615
				-22.6358	19.3424
				-20.3268	14.0573
				-16.669	3.93469
				-13.3342	-9.89994
				-12.1992	-24.2442
				-13.7212	-34.4848
				-16.7018	-36.6311
				-19.4038	-29.7533
				-20.7103	-17.1741
				-20.2972	-5.08076
				-18.08	0.746783
				-14.0707	-2.28751
				-8.75739	-12.6123
				-3.11953	-24.7813
				1.87621	-31.2349
				5.74777	-25.8535
				8.54852	-7.06108
				10.3815	21.7306
				10.8505	53.6925
				9.24296	80.6527
				5.40317	94.978
				0.41652	91.5543
				-3.79687	70.2486
				-5.84355	37.7242
				-5.80924	7.19792
				-5.03365	-4.29193
				-5.0461	17.5282
				-6.33868	75.1386
				-8.12189	156.667
				-9.31778	244.155
				-9.27304	323.92
				-7.54116	390.54
				-3.91878	444.25
				0.962509	485.961
				5.56135	514.728
				8.18267	528.346
				7.88329	524.899
				4.82951	504.641
				-0.0507683	471.416
				-5.62751	432.139
				-10.8193	394.527
				-14.5848	364.45
				-16.1784	344.097
				-15.4885	332.1
				-12.6453	325.505
				-7.3889	321.388
				0.723465	316.623
				11.5417	307.701
				23.8628	292.414
				35.7507	271.212
				45.4792	245.955
				52.2131	217.818
				55.7031	186.593
				55.5913	151.455
				51.4645	112.502
				43.5203	71.5305
				32.8578	31.0837
				21.1092	-7.01221
				9.83406	-42.5633
				0.11356	-76.691
				-7.5754	-110.199
				-13.2142	-142.471
				-16.9202	-172.154
				-18.7706	-198.383
				-18.7622	-221.149
				-16.8619	-240.736
				-13.3926	-257.073
				-9.39467	-269.759
				-6.054	-278.567
				-3.66428	-283.846
				-1.66138	-286.451
				0.488958	-287.389
				2.83098	-287.712
				4.92687	-288.311
				5.9779	-289.132
				5.21902	-289.03
				2.48926	-286.701
				-1.5011	-281.383
				-5.57168	-272.986
				-8.91754	-261.906
				-11.493	-248.499
				-13.6255	-232.811
				-15.5551	-214.934
				-17.3815	-195.254
				-19.2963	-174.062
				-21.613	-151.2
				-24.4229	-126.237
				-27.364	-99.2026
				-29.6856	-71.553
				-30.4221	-46.4221
				-28.7355	-27.5189
				-24.2369	-17.5651
				-17.0125	-17.5786
				-7.64351	-26.6783
				2.67727	-41.9274
				12.2542	-59.2901
				19.3746	-75.3977
				23.0777	-88.3383
				23.6071	-97.4946
				22.1198	-103.034
				20.0865	-105.026
				18.7301	-103.113
				18.55	-97.3804
				19.1745	-89.133
				19.7804	-80.3977
				19.6596	-72.8863
				18.3606	-67.5788
				15.8041	-64.7689
				12.5922	-63.9884
				9.82696	-64.1353
				8.49664	-64.0116
				9.04066	-62.9737
				11.0202	-61.5105
				13.0786	-60.9806
				13.8203	-62.2337
				12.9685	-64.6446
				11.437	-66.303
				10.3922	-64.8989
				10.485	-59.3504
				11.6856	-50.8071
				13.4173	-41.5025
				14.9097	-33.1514
				15.5545	-26.5796
				14.9592	-21.7662
				12.9496	-17.7778
				9.72962	-13.0351
				5.89887	-5.71002
				2.17745	6.14469
				-0.97227	24.6118
				-3.59965	52.3162
				-6.13974	92.9663
				-9.08881	149.784
				-12.9508	221.156
				-18.1395	297.556
				-24.4541	363.65
				-30.7814	404.559
				-35.5662	412.199
				-37.6348	388.158
				-36.7718	342.378
				-33.8469	289.207
				-30.4151	242.392
				-27.7149	210.574
				-25.8875	195.469
				-24.3369	193.414
				-22.4571	198.157
				-19.9348	202.622
				-16.8786	200.016
				-13.5846	185.185
				-10.05	155.927
				-6.07751	114.209
				-1.77914	66.7296
				2.40008	22.8658
				5.92827	-10.0554
				8.21185	-30.5724
				8.91868	-42.6215
				8.57969	-51.9082
				8.43476	-62.3373
				9.41511	-74.0498
				11.2907	-83.8226
				12.9201	-87.7627
				13.4151	-84.2399
				12.9837	-75.2026
				12.5989	-65.0315
				12.904	-57.1999
				13.7218	-52.1382
				14.7033	-48.512
				15.7966	-44.9667
				16.8598	-40.5772
				17.4359	-35.5313
				17.0726	-31.5122
				15.7047	-30.5304
				13.8833	-34.3579
				12.6181	-47.1364
				12.898	-78.4334
				15.3292	-138.558
				19.7785	-224.585
				25.1186	-314.201
				29.7952	-381.659
				32.6574	-416.532
				32.9027	-419.614
				29.934	-388.756
				24.0426	-321.319
				16.7546	-226.989
				9.89072	-127.048
				4.46138	-40.5685
				0.606225	23.8338
				-1.8633	65.4978
				-3.11184	86.6635
				-3.23384	90.2372
				-2.45165	79.9905
				-1.20296	61.1948
				0.229721	39.9378
				1.95876	20.6071
				3.96712	4.23616
				5.61183	-9.68968
				6.13936	-20.8243
				5.52284	-28.3319
				4.47461	-31.9867
				3.75209	-31.4745
				3.49676	-25.6516
				3.12945	-13.8217
				1.96304	2.82398
				-0.0995055	22.0613
				-2.64367	42.3281
				-5.37699	62.6809
				-8.40194	81.7231
				-11.9501	97.3732
				-16.1256	107.33
				-20.874	109.958
				-25.9937	105.697
				-31.032	97.5941
				-35.1294	89.7275
				-37.3599	84.7835
				-37.604	83.0168
				-36.8209	83.0917
				-36.2255	83.5628
				-36.3024	84.0857
				-36.5809	85.6454
				-36.1549	89.2827
				-34.1884	94.7266
				-30.0903	100.404
				-23.8113	104.179
				-16.106	103.839
				-8.2638	97.5243
				-1.69893	84.8049
				2.28892	68.0782
				3.00087	52.5278
				0.880282	43.9447
				-2.71354	45.8191
				-6.27943	57.6015
				-8.71379	75.1887
				-9.58084	92.7924
				-9.13311	104.445
				-8.05606	105.683
				-6.96333	95.995
				-5.72555	79.3062
				-3.53453	61.2688
				0.115764	46.1693
				4.95372	35.8458
				10.3656	30.4911
				15.8409	29.2941
				21.1265	29.66
				26.0085	27.4582
				29.91	19.6981
				32.0148	6.49391
				31.6839	-9.71658
				28.6853	-26.0555
				23.3404	-40.5584
				16.3618	-52.8224
				8.43372	-63.7565
				0.126628	-74.1085
				-7.8155	-83.2172
				-14.6623	-89.6092
				-20.5756	-91.9623
				-26.7516	-89.1526
				-34.0941	-80.969
				-41.7935	-69.3571
				-47.308	-57.8773
				-47.6098	-49.575
				-40.7187	-45.5331
				-26.8209	-45.1481
				-8.22217	-47.2261
				11.7117	-50.5491
				29.5166	-53.9839
				42.4821	-56.9787
				49.6295	-59.9439
				51.9968	-63.4399
				51.9681	-67.0937
				52.2371	-70.0314
				54.69	-72.3786
				59.7241	-75.9124
				66.4546	-83.3239
				73.1406	-96.9386
				77.4137	-117.109
				76.655	-140.147
				68.7185	-157.667
				52.9918	-160.306
				31.0325	-144.194
				5.84911	-113.103
				-19.6341	-74.2144
				-43.4956	-33.497
				-64.4944	5.2012
				-81.4344	38.7445
				-93.2895	64.0426
				-99.6149	79.0664
				-100.826	83.6609
				-98.5394	78.9532
				-95.1995	66.6135
				-92.6991	48.884
				-91.1892	28.507
				-88.9566	8.28972
				-83.4515	-9.06014
				-73.147	-21.1435
				-59.0676	-26.0774
				-44.3699	-22.0631
				-32.2564	-7.36178
				-24.0711	18.0664
				-18.6521	50.3621
				-13.1648	80.8582
				-4.62519	96.1009
				9.25881	78.8402
				29.7624	14.5469
				56.0971	-95.2133
				84.4142	-222.546
				108.976	-318.179
				125.144	-334.638
				131.903	-256.535
				132.195	-112.715
				130.547	43.4922
				129.733	165.918
				129.208	232.424
				125.959	244.113
				116.504	216.619
				98.9977	170.168
				74.6875	122.238
				47.4324	83.9433
				21.6402	59.4755
				0.760612	48.1514
				-13.4135	47.2941
				-21.3254	53.9738
				-25.2457	65.4785
				-27.8499	79.0607
				-31.3631	92.025
				-37.5521	102.904
				-47.5643	112.34
				-61.3041	122.395
				-76.9673	135.132
				-91.2876	151.081
				-100.364	167.842
				-100.827	180.576
				-91.024	184.933
				-71.578	179.73
				-45.0644	167.039
				-15.2529	150.733
				13.7292	135.043
				38.4261	122.746
				57.1966	113.55
				70.4937	104.571
				79.6069	92.62
				85.2613	76.1278
				87.5561	55.7402
				86.4922	33.9457
				82.385	13.7249
				76.2993	-3.17806
				69.8262	-16.6703
				63.9038	-27.7618
				57.657	-38.3736
				48.1387	-50.7786
				30.9036	-66.1011
				1.42043	-83.3017
				-42.0885	-100.063
				-96.0233	-115.126
				-152.501	-129.705
				-203.486	-146.07
				-243.186	-164.959
				-267.226	-185.171
				-271.891	-205.124
				-255.819	-223.427
				-222.128	-237.967
				-177.823	-245.423
				-130.697	-242.195
				-86.304	-225.995
				-47.0418	-196.944
				-13.2969	-157.558
				14.9419	-111.583
				37.3825	-62.792
				53.887	-15.2993
				65.2126	25.0974
				72.9325	50.5904
				78.4972	53.3677
				82.4401	29.0814
				84.2924	-20.3505
				82.8614	-86.0436
				76.9465	-153.89
				66.5976	-208.486
				53.8421	-238.462
				42.0098	-240.809
				34.2506	-221.224
				32.2923	-190.499
				35.9003	-159.271
				43.2578	-133.747
				52.1861	-114.398
				61.1206	-97.497
				69.0712	-77.8719
				75.3109	-51.9718
				79.4591	-20.2554
				81.6508	13.0332
				82.3506	42.9518
				81.9088	67.1239
				80.3757	86.4497
				77.7048	102.981
				73.9819	117.303
				69.3753	128.152
				63.8965	134.446
				57.4854	137.094
				50.3192	138.324
				42.651	139.821
				34.6082	142
				26.5716	144.286
				19.3873	145.709
				14.0257	145.523
				11.342	143.376
				11.9755	139.402
				16.0768	134.755
				23.2265	131.222
				32.5421	129.246
				42.5828	127.118
				51.2214	122.716
				55.6306	114.924
				52.7661	103.411
				40.8503	88.7547
				20.6624	73.0461
				-4.82222	59.446
				-31.4936	51.0187
				-54.6997	49.6521
				-70.1693	54.5842
				-75.5374	61.7609
				-71.0029	65.8962
				-58.5732	63.5006
				-41.3092	54.2192
				-23.3421	40.5631
				-9.31035	26.964
				-2.67859	18.0414
				-4.70695	16.1479
				-15.0149	19.7381
				-32.8309	24.3709
				-57.7603	25.7085
				-89.3369	21.7028
				-125.553	12.6379
				-161.438	0.103192
				-189.288	-14.0064
				-201.602	-28.0053
				-195.181	-40.2393
				-172.95	-48.3432
				-142.067	-48.843
				-110.191	-38.3981
				-82.6747	-15.6472
				-61.9764	18.2668
				-48.7194	59.7507
				-42.5564	102.763
				-41.842	139.978
				-43.4702	165.859
				-44.2182	180.502
				-42.0498	190.025
				-35.9307	200.337
				-25.6357	210.034
				-12.1036	209.873
				3.10609	186.383
				18.799	126.02
				34.0114	23.8555
				47.3745	-106.398
				57.464	-236.998
				63.7715	-345.614
				66.8724	-424.518
				67.4013	-469.506
				65.0602	-471.931
				59.2109	-429.16
				50.4208	-355.333
				40.7855	-274.736
				32.8308	-207.281
				28.4168	-161.549
				28.3214	-136.693
				32.2636	-127.146
				38.9924	-126.228
				46.7368	-128.115
				54.0911	-128.822
				60.5543	-126.56
				66.4647	-121.535
				72.4936	-115.033
				78.7933	-107.459
				84.5454	-96.4101
				88.4258	-78.03
				89.3007	-51.6857
				86.6753	-22.5409
				81.0318	1.15799
				73.6832	12.7552
				65.9434	10.6294
				58.1823	0.317765
				49.4544	-5.68366
				38.2051	7.94845
				23.6698	51.6605
				6.80579	124.199
				-9.98104	212.467
				-23.9739	296.805
				-33.2029	355.785
				-36.7271	368.092
				-34.0903	314.217
				-25.3273	187.408
				-12.6349	16.0848
				-1.18834	-131.352
				3.5639	-185.848
				-0.272261	-128.064
				-10.1108	2.68389
				-21.1397	141.031
				-29.188	234.586
				-32.3067	264.34
				-30.8848	241.799
				-26.7166	192.891
				-21.7826	141.983
				-17.5756	103.264
				-14.7323	80.1588
				-12.6887	69.4923
				-10.2369	66.0842
				-6.97752	65.5215
				-3.87429	64.9847
				-2.11686	62.9075
				-1.90399	58.5584
				-2.65266	52.1214
				-3.99058	44.693
				-6.0018	37.5333
				-8.53714	31.2705
				-10.7579	25.7796
				-11.6475	19.9485
				-10.8759	11.7359
				-8.91059	-0.117806
				-6.3449	-14.6998
				-3.3943	-29.9293
				-0.00524317	-44.0423
				3.7745	-56.0381
				7.643	-65.8061
				11.3272	-74.1512
				15.046	-82.5485
				19.4259	-92.7028
				24.7015	-105.614
				30.1311	-120.421
				34.2505	-134.092
				35.6519	-142.29
				33.8284	-141.27
				29.4808	-130.39
				23.7989	-113.103
				17.4984	-94.8232
				10.7962	-79.5957
				3.78436	-68.5767
				-3.76062	-60.6653
				-12.3124	-53.9488
				-21.7966	-47.0266
				-31.2279	-39.8534
				-39.2437	-33.8846
				-44.86	-31.2612
				-47.9336	-33.0873
				-49.1682	-38.1172
				-49.6958	-43.4084
				-50.575	-46.271
				-52.353	-45.6066
				-54.5089	-42.1389
				-55.5236	-37.8644
				-54.0684	-34.6728
				-49.8192	-32.8824
				-43.1035	-31.2249
				-34.5841	-28.3511
				-25.2623	-24.1599
				-16.1903	-19.8076
				-8.33569	-16.897
				-2.62812	-16.3833
				0.545303	-17.4319
				1.89788	-17.5743
				3.00872	-14.7424
				5.42412	-8.83988
				9.78516	-1.00683
				15.7241	7.91772
				22.4757	17.723
				29.4034	28.0608
				36.016	37.8777
				41.7699	46.0204
				45.9504	52.6
				47.6801	59.2243
				46.292	67.2935
				41.8081	76.2162
				34.8338	83.4613
				26.0908	86.267
				16.2747	83.6223
				6.26796	76.9066
				-2.82919	68.629
				-9.98797	60.8003
				-14.4758	54.5167
				-16.1744	50.4066
				-16.0539	48.7233
				-15.887	48.9865
				-17.0724	50.2364
				-19.9066	51.9823
				-23.9157	54.4246
				-28.3506	57.4219
				-32.2922	59.9497
				-34.7834	61.0604
				-35.1405	60.5553
				-33.0456	58.4194
				-28.3413	54.4777
				-20.916	48.8525
				-10.8884	42.2494
				1.11443	35.7554
				14.0984	30.4634
				27.2427	26.8636
				39.8239	24.4536
				50.5446	22.503
				57.6666	21.3614
				60.0447	22.4277
				57.7952	26.5923
				52.0763	33.0532
				44.5576	39.6426
				36.9207	44.0041
				30.2375	44.5415
				24.5284	40.5463
				18.8448	31.7529
				11.9438	18.2174
				3.25625	0.992682
				-6.79016	-17.2588
				-17.302	-32.8309
				-27.523	-42.429
				-37.1095	-44.297
				-46.0968	-38.1912
				-54.7259	-24.5225
				-63.0813	-3.89295
				-70.4749	22.2148
				-75.2907	50.1962
				-75.5803	74.0448
				-69.8273	86.9275
				-57.7381	83.9473
				-40.8495	64.4804
				-22.2176	32.6056
				-5.02733	-4.6806
				8.84853	-40.19
				19.074	-68.6995
				25.9116	-88.1232
				29.3616	-99.5516
				29.1965	-105.851
				25.48	-109.564
				18.6844	-111.642
				9.44341	-111.587
				-1.30283	-108.284
				-11.9344	-100.959
				-20.229	-90.1747
				-23.9383	-78.1211
				-21.6637	-67.5404
				-13.4931	-60.3078
				-0.743548	-56.7642
				14.8428	-55.805
				31.6058	-55.7121
				47.8164	-55.3766
				61.1318	-54.6885
				68.6735	-53.6095
				68.2927	-51.2209
				59.8929	-46.2776
				45.438	-38.7265
				27.8764	-30.2135
				10.1919	-22.9838
				-5.22213	-18.3808
				-17.3129	-16.3365
				-26.3759	-16.3063
				-32.87	-18.5997
				-36.6728	-24.3181
				-37.3871	-33.7177
				-34.5773	-44.9167
				-28.0188	-54.4253
				-18.2674	-59.0393
				-6.66758	-57.5182
				5.15806	-50.9
				15.56	-41.641
				23.0034	-32.3342
				26.4238	-24.6944
				25.664	-19.2362
				21.7559	-15.5091
				16.8163	-12.689
				13.4351	-10.3678
				13.873	-8.84597
				19.3875	-8.43587
				29.6827	-8.67894
				42.8907	-8.54533
				56.3953	-7.2442
				67.7974	-4.73876
				75.3395	-1.74997
				78.1611	0.528743
				76.4813	0.950862
				70.9027	-0.937289
				61.5945	-4.84113
				48.8274	-10.308
				33.8714	-16.7487
				18.9117	-22.8391
				6.28637	-26.4695
				-2.42698	-25.3428
				-6.95795	-17.8232
				-8.24993	-3.90812
				-8.21256	14.5184
				-9.52759	34.8472
				-14.92	55.2315
				-25.8069	74.9749
				-41.4122	93.807
				-59.2191	110.877
				-76.1235	124.358
				-89.3311	131.987
				-97.0209	132.079
				-98.633	124.315
				-94.535	110.052
				-85.8845	92.2913
				-74.7519	74.8212
				-63.3856	60.5438
				-53.0489	50.4873
				-43.826	44.1986
				-35.2735	40.5436
				-27.0914	38.4183
				-19.4078	37.3241
				-12.5207	37.3203
				-6.38202	38.3137
				-0.249771	39.5561
				7.11908	39.9592
				16.5476	38.903
				27.4985	36.7801
				38.2597	34.5766
				47.1789	32.9083
				53.5387	31.8795
				57.4021	31.5821
				59.0852	31.9383
				58.7197	32.3166
				56.0252	31.9288
				50.7414	30.2615
				43.4926	26.9047
				35.7196	21.6374
				28.5251	14.8197
				21.9939	7.29707
				15.5861	0.281635
				8.7853	-4.33017
				1.29707	-4.26497
				-7.06376	1.57006
				-16.3367	11.6818
				-26.2835	22.5412
				-36.3962	30.8277
				-45.9615	35.1754
				-53.9661	36.067
				-59.2984	34.5369
				-61.6439	30.8673
				-61.8523	24.2394
				-60.9302	13.7283
				-59.0143	-0.341565
				-55.7188	-16.0429
				-51.1143	-30.7343
				-45.789	-42.3429
				-40.2485	-50.1623
				-34.8232	-54.9219
				-29.616	-58.1493
				-23.7964	-61.1789
				-15.4645	-64.4866
				-2.84039	-67.8068
				14.4888	-70.7769
				35.4334	-73.2453
				58.4951	-75.0626
				83.029	-75.9434
				109.237	-75.5615
				137.18	-73.6708
				166.3	-70.1909
				196.14	-65.5321
				227.226	-60.9787
				260.354	-58.2604
				294.335	-58.4487
				324.694	-61.2857
				344.879	-65.4848
				348.539	-69.5397
				330.794	-72.1393
				288.277	-72.1567
				219.437	-68.7731
				126.515	-61.6714
				17.7837	-51.1492
				-93.5444	-38.2426
				-193.955	-24.6436
				-274.473	-12.165
				-333.184	-2.15456
				-374.813	4.7045
				-407.612	8.4652
				-438.65	9.96259
				-469.765	10.6221
				-496.812	12.0329
				-512.634	15.3393
				-511.119	20.6654
				-489.741	27.1889
				-450.276	34.0253
				-397.703	40.484
				-337.484	45.1945
				-273.689	46.3409
				-209.194	43.3005
				-146.063	37.1937
				-85.4606	30.0369
				-27.9921	23.9334
				25.6065	20.4463
				74.0345	19.9884
				115.544	21.8987
				148.615	25.2698
				172.669	29.5082
				188.234	34.1175
				196.629	38.3926
				199.664	41.7839
				199.463	44.4602
				198.046	47.0861
				196.811	49.9131
				196.314	52.3872
				195.941	53.8916
				193.769	54.2452
				187.742	53.0312
				177.296	49.463
				163.33	43.4944
				146.937	36.353
				128.984	29.7588
				110.711	24.9916
				94.1525	22.7526
				81.7838	23.6116
				75.4612	28.1474
				75.2873	36.2163
				79.5895	45.8789
				86.0144	53.8008
				92.1852	57.5378
				95.7351	56.6583
				94.8283	51.3075
				88.7701	41.1364
				77.9353	26.2727
				63.3299	8.723
				46.1204	-7.58472
				27.571	-18.6635
				9.65472	-22.8071
				-4.77647	-20.8134
				-13.2657	-14.1856
				-15.2538	-3.91913
				-12.1704	9.19807
				-6.42676	23.6752
				-0.328982	36.2128
				4.67912	40.4817
				8.19183	27.042
				10.5205	-13.1773
				12.2929	-81.2226
				14.098	-163.75
				16.2264	-236.381
				18.5546	-276.081
				20.6605	-271.705
				22.4722	-226.361
				24.7624	-154.403
				28.438	-75.6881
				33.3944	-7.88011
				38.3365	39.5927
				41.523	66.1316
				41.519	76.4419
				37.6571	76.8515
				30.2826	73.1622
				20.571	69.314
				10.0411	66.0011
				0.117789	60.023
				-8.1455	46.3912
				-14.3243	22.5321
				-18.8924	-9.68378
				-23.167	-45.8629
				-28.8314	-81.8051
				-37.1989	-114.219
				-48.5522	-139.973
				-62.0627	-155.806
				-76.0853	-159.395
				-88.4566	-150.705
				-97.2062	-132.008
				-101.503	-106.715
				-101.585	-78.6182
				-97.5997	-51.921
				-89.1105	-30.6738
				-76.1998	-17.1637
				-60.712	-10.8577
				-46.0003	-8.8764
				-35.6919	-7.25389
				-32.4386	-2.46506
				-36.668	7.00872
				-46.1973	20.1174
				-57.5707	34.1581
				-67.8334	46.301
				-75.3556	54.8666
				-79.655	59.9468
				-80.5722	63.0292
				-77.7592	65.8541
				-71.0022	69.337
				-60.3622	73.0818
				-45.734	75.768
				-26.9184	76.4013
				-4.469	75.2005
				19.7466	73.2859
				42.8039	72.3354
				61.5566	74.4872
				73.6134	81.4187
				77.9473	93.4418
				75.1322	109.998
				67.3121	130.697
				57.8263	155.21
				50.4778	181.517
				48.3942	202.993
				52.9982	205.92
				63.7935	171.903
				78.5783	90.306
				93.2818	-24.7963
				102.302	-133.036
				100.774	-191.297
				87.1676	-180.74
				63.5785	-111.205
				34.1103	-7.76527
				3.11915	100.926
				-26.1666	189.508
				-52.4963	242.862
				-76.1039	258.686
				-97.3294	243.359
				-116.172	207.011
				-132.596	160.253
				-146.053	111.492
				-154.726	65.9061
				-156.068	26.2488
				-148.439	-6.31415
				-132.289	-31.8057
				-110.16	-50.9861
				-86.0287	-65.0721
				-64.3495	-75.4071
				-48.6448	-82.8956
				-40.2412	-87.8764
				-38.1991	-90.5341
				-40.2817	-91.1468
				-44.2805	-89.9325
				-49.0353	-87.4891
				-54.5423	-85.6739
				-61.3265	-86.918
				-69.2626	-92.5329
				-76.3994	-102.201
				-79.3486	-114.399
				-75.1484	-126.941
				-62.6371	-137.813
				-42.5298	-145.964
				-16.7754	-151.309
				12.2283	-154.003
				41.9625	-153.427
				69.6714	-147.641
				92.9009	-134.404
				110.551	-113.763
				122.967	-89.9632
				131.201	-70.3582
				136.547	-61.8252
				140.311	-67.2728
				143.259	-83.8523
				145.113	-103.781
				144.95	-118.746
				142.186	-125.656
				137.075	-128.374
				130.344	-132.936
				122.462	-140.35
				113.604	-144.825
				104.261	-139.679
				95.4187	-123.978
				88.1216	-103.168
				82.9115	-84.4306
				79.5558	-71.6076
				77.2326	-63.2771
				74.8831	-54.404
				71.3763	-39.9967
				65.6537	-18.4768
				57.1952	7.73403
				46.5602	34.5196
				35.2815	59.0743
				24.8384	82.0635
				15.702	107.091
				7.50383	136.782
				-0.291899	169.305
				-8.01724	198.852
				-15.6182	219.06
				-22.7126	226.194
				-28.8555	220.267
				-33.5831	204.925
				-36.4025	186.673
				-37.3987	172.544
				-37.786	167.062
				-39.157	170.563
				-42.3896	179.588
				-47.4856	188.846
				-53.7229	193.542
				-59.7661	190.315
				-64.1104	176.987
				-65.5125	153.195
				-63.1795	121.992
				-57.2535	90.1045
				-49.3529	65.1961
				-41.9591	51.5865
				-36.8995	48.1893
				-34.7141	50.0744
				-35.1727	51.7199
				-37.592	49.6394
				-40.7019	42.9432
				-42.8753	32.3296
				-42.7382	19.3902
				-39.7468	6.43462
				-34.5247	-4.46332
				-28.5361	-12.5629
				-23.2014	-18.1146
				-19.3805	-21.424
				-17.3996	-22.702
				-17.1194	-22.2644
				-18.0824	-20.5652
				-19.7133	-18.3403
				-21.3291	-16.6515
				-22.3883	-16.4365
				-23.1061	-18.5571
				-24.413	-24.8978
				-26.9007	-38.4587
				-29.9055	-61.4167
				-31.691	-93.1059
				-30.6847	-129.278
				-26.7081	-162.627
				-20.9097	-184.762
				-14.7836	-189.139
				-9.63004	-173.259
				-6.52478	-138.93
				-6.10395	-90.9663
				-8.19494	-35.4106
				-11.8064	21.9521
				-15.6071	76.284
				-18.5897	123.013
				-20.2577	155.856
				-19.9391	166.006
				-16.4372	145.787
				-9.09283	94.8277
				1.32237	21.7939
				13.4309	-60.0868
				26.3469	-137.849
				39.5775	-201.042
				52.5342	-243.481
				64.3528	-264.172
				73.946	-266.023
				80.5154	-253.938
				84.021	-233.304
				84.6333	-208.276
				81.9544	-181.008
				75.5697	-152.625
				66.3758	-124.229
				56.6864	-96.962
				48.8776	-71.8916
				44.3054	-50.0273
				43.1343	-32.2383
				44.4082	-19.0741
				46.2935	-10.4987
				46.6308	-5.608
				43.7937	-3.0702
				37.6536	-2.09793
				29.6426	-2.1703
				21.4453	-1.88457
				13.5581	0.87051
				4.97872	7.86498
				-5.93543	20.0252
				-20.011	36.9586
				-36.2811	56.3741
				-52.5843	74.6517
				-67.1159	88.7215
				-79.171	97.7565
				-88.5849	103.295
				-94.9423	107.897
				-97.5591	113.381
				-95.9422	119.428
				-90.3357	123.685
				-82.3615	123.953
				-74.8145	120.463
				-70.1774	116.185
				-69.1563	114.994
				-70.4723	118.859
				-72.0157	126.542
				-72.4488	134.819
				-71.9653	140.595
				-71.5886	142.426
				-71.6161	140.681
				-70.848	136.485
				-67.3836	130.681
				-59.7869	123.589
				-47.5484	115.277
				-31.1445	105.905
				-12.0978	95.9962
				7.27032	86.3342
				24.7371	77.5413
				39.1925	69.7076
				50.8149	62.0743
				60.2986	53.2098
				68.0189	42.1072
				73.7913	29.3817
				77.1784	16.9707
				77.9846	6.29025
				76.4857	-2.76699
				73.3743	-10.9895
				69.4703	-18.8731
				65.349	-26.5184
				61.4955	-33.9988
				58.6248	-41.6315
				57.3657	-49.774
				57.8316	-58.4275
				59.818	-67.2849
				63.1645	-76.2148
				67.6749	-85.5182
				72.9778	-95.4663
				78.5504	-105.589
				83.503	-114.776
				86.512	-122.072
				86.609	-127.132
				84.1642	-129.976
				80.4624	-130.38
				75.9999	-128.005
				69.8768	-123.554
				61.1145	-118.983
				49.8508	-116.297
				36.9756	-116.526
				23.1504	-119.231
				8.41493	-122.39
				-7.68137	-123.208
				-25.6098	-119.502
				-45.1791	-110.677
				-65.1549	-97.8814
				-83.6439	-83.2958
				-99.1884	-68.7393
				-111.37	-54.7094
				-120.059	-40.8646
				-124.466	-27.2104
				-123.075	-14.7915
				-114.172	-5.65335
				-97.2619	-1.88914
				-75.0003	-4.14476
				-53.0577	-11.2983
				-36.9885	-21.524
				-29.1566	-32.4947
				-28.4882	-40.5727
				-32.3303	-41.2266
				-38.1507	-31.024
				-43.7927	-9.82473
				-46.8496	18.1819
				-44.9389	46.0499
				-37.1278	68.0464
				-24.6252	82.4739
				-9.81451	90.8302
				5.14779	95.5312
				18.626	98.8313
				28.6986	102.739
				32.9561	108.937
				30.1478	118.171
				22.0715	129.327
				13.0292	139.173
				7.03289	142.628
				5.46642	132.752
				6.94217	102.887
				8.62888	53.5411
				7.7032	-2.10806
				2.55173	-43.234
				-6.3929	-54.2427
				-16.7479	-33.7632
				-25.3725	6.60098
				-29.4962	50.6266
				-27.0634	85.7521
				-17.081	106.097
				-0.122389	110.704
				21.6722	101.217
				45.101	81.3772
				66.6635	56.9275
				83.5006	34.0623
				94.1588	17.3684
				98.937	9.11247
				99.9816	9.52936
				100.856	17.0016
				105.204	28.2362
				115.089	39.2154
				129.851	47.4495
				146.131	53.8949
				159.201	61.4254
				164.317	70.4023
				156.872	76.2423
				132.231	72.432
				87.3474	56.4335
				24.1947	31.9254
				-48.3698	5.10248
				-116.982	-19.665
				-168.994	-40.4254
				-197.143	-56.2112
				-201.174	-66.2347
				-186.074	-70.0235
				-158.728	-67.7992
				-125.358	-60.5856
				-90.7027	-50.1524
				-58.2119	-39.124
				-30.1373	-31.3976
				-7.40923	-32.147
				9.48879	-45.539
				18.7183	-70.7822
				16.7979	-100.995
				0.921564	-126.922
				-28.2516	-141.898
				-65.8877	-144.155
				-104.677	-136.026
				-137.439	-121.705
				-159.063	-105.445
				-167.045	-90.9173
				-160.979	-80.7303
				-142.073	-75.5013
				-113.151	-73.5354
				-78.584	-71.8694
				-43.4291	-68.039
				-11.8499	-61.4419
				14.0357	-53.2664
				33.6623	-44.9883
				46.6892	-37.6114
				52.9939	-32.5236
				53.8346	-31.2196
				52.0843	-33.6067
				50.9603	-37.8762
				52.3982	-41.815
				56.2994	-43.5915
				61.1002	-41.7971
				65.0411	-35.2313
				66.969	-23.0407
				66.2425	-5.42846
				62.4576	16.086
				55.6258	39.4272
				46.2653	62.8491
				34.7357	85.297
				20.7709	106.058
				4.35108	123.942
				-12.9441	137.262
				-27.6325	144.926
				-35.622	147.256
				-34.3069	145.474
				-23.7997	140.457
				-6.69544	132.732
				13.0091	123.421
				31.3564	113.896
				45.7875	104.409
				55.8142	93.4772
				62.6165	78.6262
				67.8562	58.2486
				72.4174	33.1916
				75.6813	6.63586
				75.8115	-16.5205
				70.9249	-29.5915
				60.4057	-25.9061
				45.5543	-3.97473
				28.949	29.0682
				13.0131	60.9574
				-0.666974	81.5179
				-11.0108	86.9618
				-17.4801	79.7587
				-20.5402	65.7977
				-21.0327	50.4079
				-18.7092	36.0915
				-11.9705	23.2708
				0.857765	11.7149
				20.5935	1.10339
				47.4771	-8.83584
				81.2386	-18.3321
				120.14	-27.4934
				160.369	-36.0413
				196.88	-43.4107
				224.661	-49.2758
				239.184	-53.6778
				236.883	-56.6545
				216.935	-58.0515
				183.116	-57.6472
				143.395	-55.425
				106.778	-51.9389
				79.2659	-48.1237
				61.7467	-44.3677
				50.6311	-40.7363
				39.8186	-38.6536
				23.7138	-40.8199
				0.919161	-48.7531
				-24.9445	-61.251
				-48.8038	-75.2038
				-68.3503	-87.2168
				-85.6128	-94.5526
				-105.771	-95.454
				-134.632	-89.5394
				-175.553	-78.2116
				-226.251	-64.4085
				-278.199	-51.5258
				-320.702	-42.1392
				-347.141	-37.1686
				-358.256	-35.7967
				-359.966	-36.0725
				-358.346	-35.9503
				-356.119	-34.3225
				-352.389	-31.118
				-344.644	-26.8481
				-331.069	-22.7574
				-311.529	-20.385
				-286.944	-20.1481
				-258.043	-21.0778
				-224.782	-21.6311
				-186.839	-20.0506
				-144.362	-14.7366
				-98.4178	-5.24269
				-51.5143	6.95606
				-7.42908	18.722
				30.5628	26.624
				61.4923	28.8324
				86.6119	26.0453
				107.662	20.59
				125.036	14.7522
				137.557	9.90582
				144.204	6.84745
				145.811	6.51422
				144.821	10.1829
				143.816	18.2642
				144.725	28.2024
				148.734	34.871
				155.954	34.3037
				165.413	26.5809
				175.646	15.6079
				185.19	7.17945
				192.797	6.23903
				197.697	14.2687
				199.801	29.2063
				199.405	48.2597
				196.854	70.1543
				192.641	94.4493
				187.411	119.677
				181.634	142.672
				175.238	159.493
				167.397	166.956
				157.104	163.492
				144.097	149.505
				128.845	127.911
				111.975	103.208
				94.2584	78.5814
				76.6758	54.6361
				60.1006	31.0259
				45.2402	8.16173
				32.7767	-11.9587
				22.9863	-25.5003
				15.1356	-28.784
				7.76084	-22.4107
				0.041784	-13.1767
				-7.3213	-10.1047
				-13.0726	-17.0474
				-16.896	-29.6644
				-19.5867	-40.5544
				-22.33	-46.1288
				-26.1676	-47.8029
				-31.7763	-48.3466
				-39.3082	-48.7748
				-48.0577	-48.4893
				-56.4979	-46.954
				-63.0633	-44.9852
				-66.7842	-45.2069
				-67.3888	-50.4906
				-65.2475	-61.2948
				-61.3402	-74.955
				-57.338	-86.6995
				-55.3316	-90.2275
				-56.7265	-78.0712
				-61.1204	-43.6351
				-66.3307	13.8307
				-69.2373	82.4382
				-66.6788	135.357
				-56.7711	142.204
				-40.2991	92.0062
				-20.4463	6.42089
				-0.673069	-74.32
				17.0381	-119.593
				32.1296	-122.792
				44.7556	-95.2042
				55.455	-54.1103
				64.8055	-15.4553
				72.8293	10.0006
				78.3412	18.3684
				78.9137	11.4212
				72.0145	-5.64782
				56.4327	-25.6878
				33.113	-41.6197
				5.34429	-49.2518
				-22.1253	-48.6153
				-45.1166	-43.0808
				-61.7838	-37.3714
				-72.949	-35.2168
				-81.2563	-37.2241
				-89.6227	-40.4134
				-99.803	-40.4282
				-112.067	-34.9514
				-125.665	-25.4231
				-139.32	-15.7415
				-151.832	-9.19612
				-162.717	-5.95494
				-172.135	-3.3006
				-180.094	1.38172
				-185.841	8.24573
				-188.075	15.3484
				-185.486	20.1259
				-177.145	20.5866
				-162.979	16.1438
				-144.093	7.81181
				-122.358	-2.33793
				-99.8303	-12.0505
				-78.5098	-19.6288
				-59.7059	-24.1602
				-43.1408	-25.1736
				-27.0955	-22.1335
				-9.89899	-14.5338
				8.85215	-2.9123
				28.6985	10.4168
				49.1891	22.1092
				69.7643	29.4729
				89.1063	31.7633
				105.185	29.9643
				116.731	25.3701
				124.492	19.0833
				130.051	12.7721
				133.79	8.69175
				134.74	8.61854
				131.98	12.9139
				125.736	20.3096
				117.43	28.5755
				108.938	35.6822
				101.712	40.343
				96.5382	41.6819
				93.7216	39.0688
				93.1259	32.6555
				94.0214	23.8893
				95.0636	15.1094
				94.7184	8.3198
				91.9028	4.16867
				86.3388	2.21389
				78.5384	2.24986
				69.6961	4.43498
				61.5201	7.71089
				55.4919	9.68289
				51.8603	8.40152
				49.6128	3.20596
				47.3049	-5.19301
				43.8389	-14.4246
				38.9946	-21.3173
				33.3736	-23.8567
				27.6423	-22.2761
				21.9143	-18.4748
				15.9501	-14.4776
				9.69732	-11.2059
				3.40263	-8.49099
				-2.58759	-5.90073
				-7.88559	-3.28595
				-11.9999	-0.71546
				-14.5121	1.72964
				-15.6565	4.03651
				-16.6218	6.61272
				-18.8495	10.1747
				-22.965	14.4909
				-28.6245	18.3514
				-35.261	21.3093
				-42.5618	24.0471
				-50.4705	27.3941
				-59.0801	32.233
				-67.9821	39.7569
				-75.3984	51.0428
				-78.5741	66.3896
				-75.4593	84.759
				-65.9335	103.017
				-51.6726	114.787
				-35.1997	109.965
				-18.6725	77.1398
				-3.22866	10.6234
				10.2907	-79.9239
				20.3759	-166.84
				25.2794	-216.764
				24.0524	-209.618
				16.9786	-148.856
				5.76344	-57.6924
				-6.75522	34.0853
				-18.0041	103.599
				-27.103	141.172
				-34.7008	149.087
				-41.4861	136.285
				-47.3047	112.561
				-51.6386	85.4684
				-54.2027	60.2179
				-54.7842	40.0642
				-52.9994	26.0965
				-48.6313	17.4413
				-42.0909	12.2732
				-34.3583	8.88952
				-26.4604	6.05016
				-19.0074	2.72913
				-12.1384	-1.98566
				-5.81896	-8.52752
				-0.193664	-16.2177
				4.41687	-23.5194
				7.77303	-29.6096
				9.8683	-34.9079
				11.0463	-39.6503
				11.8323	-43.0349
				12.4454	-43.9093
				12.7307	-41.6939
				12.5127	-36.8076
				11.9623	-30.5109
				11.9376	-24.4513
				13.7914	-20.3511
				18.3886	-19.6601
				25.3557	-22.9548
				33.3407	-29.488
				40.4373	-37.2335
				44.1616	-43.5405
				42.0816	-46.3265
				33.6277	-45.1119
				21.1694	-40.8519
				8.58894	-34.5469
				-1.10745	-26.814
				-6.61092	-19.3508
				-7.79868	-15.2144
				-5.06743	-16.6585
				1.34197	-23.3826
				11.6039	-32.7426
				25.8597	-41.2757
				43.5695	-46.5108
				63.0533	-47.6739
				81.5309	-44.8976
				96.0864	-38.347
				105.24	-28.4756
				109.818	-16.9163
				112.176	-6.74044
				114.324	-1.82058
				116.376	-5.89352
				116.138	-21.4635
				109.986	-48.7308
				94.8035	-84.4381
				69.8766	-120.882
				37.4794	-148.301
				2.20787	-160.802
				-30.342	-158.948
				-55.1039	-146.539
				-68.7123	-127.213
				-70.0348	-103.714
				-60.1752	-77.8822
				-41.9762	-50.6011
				-19.0529	-22.4429
				4.97387	5.24843
				26.333	30.0105
				40.4731	49.2567
				41.7749	62.0268
				24.2395	69.9234
				-16.1903	75.8965
				-78.5818	81.8445
				-155.547	87.7344
				-234.048	92.9677
				-298.455	97.994
				-336.135	104.483
				-342.277	113.734
				-319.677	124.664
				-275.632	134.073
				-220.053	138.994
				-164.288	138.257
				-119.1	132.625
				-92.0568	124.279
				-85.1997	115.754
				-94.5233	109.025
				-111.842	105.151
				-127.505	103.954
				-132.894	104.05
				-122.989	103.747
				-98.3299	101.935
				-64.9269	98.1732
				-31.8241	92.1531
				-7.54381	83.2546
				2.95642	70.8262
				-0.340517	55.0557
				-13.2627	37.7942
				-29.7501	22.0358
				-44.1106	9.94087
				-52.0107	2.1232
				-50.223	-1.1302
				-36.0844	0.41564
				-7.77466	5.43646
				34.4785	10.2499
				87.2784	10.5282
				144.271	3.97641
				197.933	-8.69793
				241.857	-24.9172
				272.369	-41.8924
				288.953	-57.4621
				293.789	-70.1462
				290.964	-79.0398
				285.099	-83.7247
				279.303	-84.2514
				274.144	-81.2173
				268.81	-75.5421
				262.535	-67.8466
				254.486	-58.6933
				243.666	-49.9215
				229.805	-44.5638
				213.56	-44.8323
				195.392	-50.8568
				174.174	-60.8546
				146.584	-71.6165
				108.645	-79.3833
				59.6772	-81.1621
				5.50657	-75.745
				-42.6622	-64.0625
				-73.4031	-48.8252
				-80.9619	-33.6307
				-67.9744	-22.0565
				-43.0613	-16.7258
				-15.983	-18.1875
				5.4462	-24.4831
				15.7622	-32.2684
				11.3426	-38.6249
				-9.38301	-41.7816
				-44.5275	-41.0303
				-87.3244	-36.9903
				-127.176	-30.8533
				-153.435	-22.6372
				-159.185	-11.2477
				-143.266	3.91183
				-110.01	21.6284
				-66.5447	38.2237
				-19.6625	48.5754
				25.4175	48.6654
				64.7757	37.1282
				95.2875	15.2957
				113.988	-12.7579
				117.871	-40.6458
				105.009	-61.7566
				75.6296	-71.8956
				31.5922	-70.2679
				-24.4732	-58.2626
				-88.5671	-37.5607
				-153.784	-9.15149
				-210.267	25.7987
				-247.891	63.6654
				-260.389	97.6779
				-248.236	120.351
				-218.194	126.54
				-179.835	114.928
				-141.513	88.0053
				-108.261	51.2251
				-81.9848	11.8638
				-62.8492	-22.346
				-50.7966	-45.0482
				-45.9773	-53.0441
				-47.9878	-46.8803
				-55.4699	-29.9363
				-66.3383	-6.7435
				-77.6308	18.4765
				-85.5241	42.3722
				-86.7446	62.3166
				-80.3664	76.4112
				-68.1004	83.8844
				-53.0839	84.8209
				-38.343	78.8463
				-25.8698	65.0447
				-16.5865	43.9763
				-10.5744	18.7745
				-7.00159	-6.13504
				-4.10467	-26.8999
				0.27218	-41.4025
				7.88818	-49.3688
				19.5646	-51.6437
				35.0117	-49.7203
				52.9673	-45.6614
				71.0326	-41.5288
				85.0976	-38.4831
				90.1475	-36.4807
				83.2332	-34.8006
				65.8975	-32.8866
				43.4334	-30.9272
				21.9493	-29.5759
				5.8853	-28.7987
				-2.76885	-27.9247
				-3.88732	-27.5071
				1.62251	-29.425
				12.0965	-34.6495
				25.4466	-42.3721
				40.0378	-50.9521
				55.1555	-58.5443
				70.3996	-63.1948
				84.7532	-63.2853
				96.1536	-58.1478
				101.964	-48.2135
				100.517	-34.881
				92.6388	-20.2538
				81.6025	-6.48339
				71.4683	5.04753
				64.9945	14.1735
				62.707	21.7886
				63.7228	29.0667
				66.9753	36.3515
				71.1821	42.7317
				73.8096	46.7223
				71.0141	47.1488
				59.2618	44.0543
				37.1653	39.3685
				6.44068	36.0423
				-28.2068	36.2421
				-60.3997	40.5814
				-84.1894	48.588
				-95.9286	59.1526
				-95.0338	70.4112
				-83.5349	79.7756
				-65.133	84.8386
				-44.2669	84.7606
				-25.2814	80.7306
				-11.8076	74.6107
				-5.92732	66.8094
				-6.84426	55.6554
				-10.1787	39.0923
				-9.36838	16.9949
				1.03337	-7.69613
				22.6611	-29.6188
				53.2476	-42.8472
				88.1306	-42.5486
				121.639	-26.9954
				147.946	-0.280307
				161.729	28.2637
				159.255	49.5022
				139.535	59.4185
				104.799	59.3598
				60.4113	53.3502
				14.0295	45.4235
				-26.73	38.03
				-57.0859	31.8169
				-76.1144	26.564
				-85.8291	22.0826
				-90.1575	18.2796
				-94.169	14.7877
				-102.447	10.8469
				-116.835	5.72263
				-135.595	-0.597718
				-155.02	-7.40343
				-171.443	-14.2452
				-181.606	-21.2047
				-182.276	-27.9451
				-170.826	-33.4797
				-147.017	-37.0891
				-113.703	-39.0562
				-74.699	-40.463
				-32.5981	-41.9995
				10.4081	-42.7148
				50.1661	-40.3464
				80.0369	-33.4597
				93.8695	-23.5094
				90.2231	-15.0021
				73.5192	-13.4796
				51.2716	-22.1949
				30.2693	-39.8031
				13.9432	-61.1011
				1.49574	-79.4223
				-11.1066	-88.7509
				-28.4628	-87.0626
				-52.3397	-80.2179
				-79.8751	-79.7297
				-105.193	-92.9474
				-123.195	-115.791
				-132.304	-135.941
				-133.891	-142.106
				-129.377	-130.954
				-118.54	-107.573
				-100.522	-80.2666
				-75.2527	-54.6133
				-43.6484	-31.2561
				-7.7925	-7.83014
				28.5944	17.228
				60.8784	42.1557
				85.1724	63.0201
				99.2046	77.415
				102.33	86.0713
				95.426	90.6034
				80.2567	91.5937
				58.2976	89.2146
				30.6572	83.848
				-0.451573	76.2757
				-30.6944	68.4408
				-54.6501	63.514
				-68.0094	64.663
				-68.7226	73.6163
				-56.594	88.9558
				-32.688	103.365
				0.946753	102.196
				41.5039	68.9486
				85.441	-1.48702
				128.361	-92.6994
				165.424	-173.105
				192.604	-214.989
				208.128	-208.523
				213.284	-163.012
				212.237	-99.7095
				210.545	-40.4207
				212.63	2.62376
				219.592	28.9031
				228.782	43.962
				234.948	53.1331
				232.285	59.3083
				217.183	63.342
				190.053	65.132
				154.483	64.8518
				114.507	63.5275
				72.4567	62.5629
				29.3128	62.8036
				-12.6603	64.0243
				-47.7886	65.248
				-68.1011	65.4723
				-67.229	64.223
				-44.5091	61.7186
				-6.71777	58.3185
				34.1858	53.771
				66.3999	47.4956
				83.095	39.5693
				83.5276	31.263
				70.609	24.3692
				47.4518	19.5873
				15.0504	16.2133
				-27.7241	13.6788
				-81.843	12.3644
				-145.368	12.7461
				-212.406	14.4498
				-274.634	16.2912
				-324.171	16.9944
				-355.584	15.8796
				-366.55	13.0529
				-358.371	9.02947
				-336.426	4.20322
				-309.313	-1.3523
				-285.975	-7.64107
				-271.684	-14.4507
				-265.495	-21.4644
				-261.548	-28.5523
				-253.111	-35.6029
				-235.698	-41.9369
				-207.572	-46.5713
				-169.266	-49.7364
				-123.425	-53.264
				-73.8552	-58.8278
				-23.3148	-66.653
				27.7062	-75.7946
				79.5267	-84.5695
				130.809	-90.8607
				177.941	-92.7099
				216.321	-88.9018
				241.454	-79.3961
				249.672	-65.6019
				239.701	-50.0226
				214.367	-35.1479
				180.885	-22.5435
				149.19	-12.8679
				128.477	-6.21171
				123.404	-2.24242
				132.717	-0.448344
				151.214	-0.311307
				172.982	-1.6593
				193.394	-5.44696
				208.841	-13.0043
				215.116	-23.6042
				207.172	-33.5121
				181.043	-37.3748
				136.224	-30.454
				76.8088	-10.96
				10.291	18.2616
				-54.8732	49.9603
				-110.678	75.1168
				-150.09	86.9882
				-167.792	84.3696
				-161.384	71.8955
				-132.806	57.2954
				-89.0761	47.4434
				-41.1344	45.2617
				-0.470037	48.8729
				25.1508	53.2359
				34.1368	53.5428
				29.9079	48.192
				17.0053	39.2822
				-2.68107	31.7077
				-30.6514	31.5178
				-68.8792	42.2938
				-115.932	61.8252
				-165.837	83.3714
				-210.52	100.789
[truncated: 1,244 more rows]

## Sheet: Participant 07
MTP_moment	Plantar_Aponuerosis_Length	MTP_angle	Time	AbductorHallucis	FlexorDigitorumBrevis
NaN	NaN	-42.7309	0	28.2719	-3.94576
NaN	NaN	-42.3403	0.0072	30.9311	-4.01632
NaN	NaN	-41.7853	0.0144	32.0181	-4.18649
NaN	NaN	-41.0803	0.0216	31.3902	-4.40305
NaN	NaN	-40.337	0.0288	29.5191	-4.77832
NaN	NaN	-39.6565	0.036	27.1258	-5.39628
NaN	NaN	-39.1108	0.0432	25.0687	-5.92003
NaN	NaN	-38.7204	0.0504	24.5169	-5.37088
NaN	NaN	-38.4867	0.0576	26.988	-2.34198
NaN	NaN	-38.3228	0.0648	33.6842	4.15129
NaN	NaN	-38.1373	0.072	43.9034	13.3032
NaN	NaN	-37.8539	0.0792	53.8726	21.7741
NaN	NaN	-37.4113	0.0864	58.0929	25.0278
NaN	NaN	-36.8143	0.0936	52.8646	20.2249
NaN	NaN	-36.0979	0.1008	38.9389	8.14661
NaN	NaN	-35.3124	0.108	21.0222	-7.32457
NaN	NaN	-34.5116	0.1152	4.6383	-21.3953
NaN	NaN	-33.7348	0.1224	-7.09678	-30.7112
NaN	NaN	-33.0056	0.1296	-14.1474	-34.4207
NaN	NaN	-32.3517	0.1368	-17.7793	-33.4971
NaN	NaN	-31.77	0.144	-18.9285	-29.5256
NaN	NaN	-31.2692	0.1512	-18.0892	-24.0234
NaN	NaN	-30.849	0.1584	-15.8285	-18.1387
NaN	NaN	-30.5008	0.1656	-12.9045	-12.5266
NaN	NaN	-30.2164	0.1728	-9.91213	-7.48756
NaN	NaN	-29.973	0.18	-7.0318	-3.21829
NaN	NaN	-29.7666	0.1872	-4.33039	0.110611
NaN	NaN	-29.5819	0.1944	-2.16437	2.4476
NaN	NaN	-29.4144	0.2016	-1.03756	3.91106
NaN	NaN	-29.2557	0.2088	-1.14768	4.70225
NaN	NaN	-29.1015	0.216	-2.12494	4.97471
NaN	NaN	-28.9486	0.2232	-3.15125	4.84861
NaN	NaN	-28.7974	0.2304	-3.46123	4.5674
NaN	NaN	-28.6557	0.2376	-2.8179	4.52739
NaN	NaN	-28.5357	0.2448	-1.41659	5.08422
NaN	NaN	-28.466	0.252	0.645848	6.31513
NaN	NaN	-28.4551	0.2592	3.6181	7.8954
NaN	NaN	-28.5065	0.2664	7.68599	9.23625
NaN	NaN	-28.5876	0.2736	12.3505	9.88488
NaN	NaN	-28.6552	0.2808	16.435	9.80027
NaN	NaN	-28.6758	0.288	18.8385	9.23995
NaN	NaN	-28.6326	0.2952	19.1009	8.49723
NaN	NaN	-28.4836	0.3024	17.3286	7.75955
NaN	NaN	-28.2289	0.3096	14.0219	7.10037
NaN	NaN	-27.8531	0.3168	9.91267	6.53118
NaN	NaN	-27.4049	0.324	5.67523	6.04074
NaN	NaN	-26.943	0.3312	2.02035	5.56597
NaN	NaN	-26.5402	0.3384	0.0980353	4.9607
NaN	NaN	-26.2588	0.3456	1.31422	4.07282
NaN	0.183572	-26.1586	0.3528	6.54683	2.85065
NaN	NaN	-26.2278	0.36	15.4387	1.35433
NaN	NaN	-26.4798	0.3672	26.1157	-0.274583
NaN	NaN	-26.8304	0.3744	35.6356	-1.82982
NaN	NaN	-27.2195	0.3816	41.2248	-3.07177
NaN	NaN	-27.5833	0.3888	41.5127	-3.80647
NaN	NaN	-27.9006	0.396	36.8478	-3.98453
NaN	NaN	-28.2479	0.4032	28.7402	-3.6844
NaN	NaN	-28.6043	0.4104	19.1061	-2.96641
NaN	NaN	-28.9818	0.4176	9.64524	-1.80859
NaN	NaN	-29.3765	0.4248	1.45309	-0.249616
NaN	NaN	-29.7983	0.432	-5.07346	1.45733
NaN	NaN	-30.2567	0.4392	-10.2336	2.96421
NaN	NaN	-30.774	0.4464	-14.8643	4.09006
NaN	NaN	-31.3658	0.4536	-19.7838	4.88694
NaN	NaN	-32.0049	0.4608	-25.2976	5.51403
NaN	NaN	-32.6484	0.468	-31.3612	6.06239
NaN	NaN	-33.2818	0.4752	-37.9718	6.46107
NaN	NaN	-33.8942	0.4824	-45.0887	6.62155
NaN	NaN	-34.4956	0.4896	-52.3424	6.6173
NaN	NaN	-35.1071	0.4968	-59.0226	6.56033
17.6991	0.18446	-35.7487	0.504	-64.1761	6.36767
17.2628	0.184368	-36.4345	0.5112	-66.7647	5.79634
16.7674	0.184262	-37.1622	0.5184	-66.1586	4.70106
16.2832	0.184154	-37.9303	0.5256	-62.6139	3.21844
15.7952	0.184055	-38.7591	0.5328	-57.1547	1.70949
15.2688	0.183968	-39.6626	0.54	-51.1287	0.55809
14.8071	0.183895	-40.6716	0.5472	-45.9148	0.019602
14.3633	0.183818	-41.7576	0.5544	-42.6746	0.165721
13.8636	0.183714	-42.9185	0.5616	-42.0692	0.883094
13.474	0.18357	-44.144	0.5688	-44.1417	1.91013
13.0769	0.183384	-45.4568	0.576	-48.3764	2.91868
12.7114	0.183173	-46.9139	0.5832	-53.8717	3.68619
12.3505	0.182965	-48.577	0.5904	-59.6843	4.27031
11.9286	0.182785	-50.5479	0.5976	-65.1372	4.90665
11.2645	0.182646	-52.8156	0.6048	-69.5845	5.64255
10.2674	0.182562	-55.465	0.612	-71.8515	6.16047
8.91699	0.18252	-58.4331	0.6192	-70.3778	6.03979
7.43319	0.182507	-61.7023	0.6264	-64.1026	5.11735
5.78108	0.182502	-65.138	0.6336	-53.0349	3.52907
3.9561	0.182473	-68.5384	0.6408	-38.1866	1.52842
2.14098	0.182383	-71.5856	0.648	-21.1621	-0.572905
0.458714	0.182207	-73.9598	0.6552	-3.53245	-2.38313
-0.846102	0.181915	-75.1402	0.6624	13.5295	-3.60503
-1.59866	0.18154	-75.1228	0.6696	28.9519	-4.23438
-1.98938	0.181091	-73.6338	0.6768	41.4685	-4.43451
-2.14323	0.180607	-71.0223	0.684	50.0918	-4.29516
-2.01079	0.18013	-67.5596	0.6912	54.7675	-3.78371
-1.74056	0.179699	-63.6611	0.6984	56.1954	-2.82782
-1.38398	0.179337	-59.7131	0.7056	55.081	-1.50765
-0.998905	0.17907	-56.0856	0.7128	51.8375	-0.16805
-0.558349	0.178894	-53.014	0.72	47.0389	0.989294
				42.0506	2.38957
				38.8836	4.49761
				38.8621	6.49605
				41.5754	6.3257
				45.6755	2.60615
				50.1378	-4.04033
				54.1493	-11.7089
				56.5517	-18.4862
				56.1804	-23.0789
				52.6127	-24.991
				46.3942	-24.4494
				38.7338	-22.164
				31.1402	-19.0153
				25.1414	-15.7036
				21.8692	-12.5324
				21.559	-9.44843
				23.489	-6.17008
				26.5172	-2.34802
				29.5026	2.06043
				31.2411	6.38586
				30.6681	9.37976
				27.6324	10.0151
				23.1969	8.228
				18.7737	4.87713
				15.1178	1.12501
				12.3477	-2.11884
				10.5146	-4.4263
				9.70014	-5.78317
				9.70881	-6.3711
				9.94709	-6.42626
				9.70425	-6.19643
				8.62722	-5.85468
				6.77023	-5.44368
				4.06311	-4.90081
				0.107085	-4.0667
				-5.25625	-2.75368
				-11.507	-0.868524
				-17.9381	1.56834
				-24.4343	4.4158
				-31.357	7.3439
				-38.7645	9.8953
				-46.1806	11.6979
				-53.0881	12.6435
				-59.3017	12.9099
				-64.7168	12.7558
				-68.8143	12.2688
				-70.5937	11.41
				-69.0165	10.2901
				-63.4222	9.32786
				-53.5749	9.15702
				-39.6139	10.3339
				-22.3316	12.9603
				-3.55375	16.3957
				14.128	19.3072
				28.3896	20.3689
				38.1714	19.2803
				43.5808	16.826
				44.8258	13.6431
				41.9092	9.40763
				35.5762	3.59854
				27.7873	-3.41202
				20.8175	-10.3605
				16.0512	-15.8823
				13.6181	-19.1793
				12.8113	-20.2136
				12.6615	-19.5046
				12.3556	-17.7643
				11.401	-15.6055
				9.58828	-13.4359
				7.02566	-11.4802
				4.2747	-9.79867
				2.0556	-8.32239
				0.403018	-6.93271
				-1.65169	-5.50441
				-5.25038	-3.93044
				-10.6823	-2.19425
				-17.1177	-0.40145
				-23.0756	1.30874
				-27.1803	2.8284
				-28.6738	4.02567
				-27.403	4.72991
				-23.5699	4.8576
				-17.5169	4.50455
				-9.69351	3.86127
				-0.998784	3.10583
				6.99498	2.41649
				12.6359	1.96334
				15.121	1.78791
				14.7491	1.75181
				12.5087	1.6774
				9.61565	1.52479
				7.17201	1.406
				5.99592	1.46454
				6.6135	1.77497
				9.18896	2.27874
				13.4841	2.73032
				18.9889	2.76757
				24.9624	2.13918
				30.3295	0.909025
				33.8922	-0.534994
				35.0569	-1.70918
				34.3649	-2.34332
				33.0618	-2.50078
				32.1843	-2.469
				32.0939	-2.57041
				32.4336	-2.97031
				32.2396	-3.59965
				30.3326	-4.281
				25.8478	-4.87911
				18.6715	-5.29296
				9.78429	-5.33847
				1.28689	-4.61675
				-4.27792	-2.4257
				-5.12789	2.09622
				-1.24843	9.33553
				5.21938	18.2604
				10.5272	26.1106
				11.165	29.6291
				6.08175	27.2867
				-2.57406	20.6229
				-10.9636	13.3629
				-16.5591	8.73397
				-20.515	7.09474
				-26.8152	6.25381
				-38.4859	4.27642
				-54.8249	1.45751
				-72.4377	-0.798974
				-88.4026	-2.36877
				-102.056	-4.97945
				-114.105	-10.5683
				-124.682	-19.5217
				-132.454	-30.3966
				-135.282	-40.7715
				-131.54	-48.2525
				-121.01	-51.2374
				-104.947	-49.2975
				-85.4725	-43.119
				-64.7776	-34.1288
				-44.4458	-23.9888
				-25.086	-14.181
				-6.54117	-5.77406
				11.4231	0.707305
				28.6663	5.28097
				44.7364	8.34148
				59.0229	10.4041
				70.83	11.8298
				79.5042	12.7006
				84.6102	12.9658
				86.0959	12.657
				84.3813	11.9428
				80.2188	11.0699
				74.3428	10.3103
				67.2192	9.88688
				59.1149	9.85218
				50.3204	10.0501
				41.1126	10.2989
				31.5439	10.6296
				21.6218	11.2428
				11.7378	12.2179
				2.75075	13.3588
				-4.33462	14.3284
				-8.78247	14.8551
				-10.3382	14.8042
				-9.13634	14.1478
				-5.5886	12.9414
				-0.587317	11.3232
				4.34138	9.4906
				7.55372	7.62688
				8.21875	5.82465
				6.86664	4.07953
				5.09789	2.37552
				4.65093	0.789896
				6.55392	-0.49766
				10.9073	-1.28959
				17.101	-1.49065
				23.9163	-1.22591
				29.5729	-0.820292
				32.2445	-0.595308
				30.8658	-0.684907
				25.611	-0.996506
				17.8966	-1.28386
				9.9135	-1.33116
				3.76075	-1.1377
				0.712224	-0.905868
				1.05255	-0.87877
				4.32292	-1.19666
				9.58388	-1.83206
				15.5701	-2.65348
				20.9824	-3.60424
				24.8815	-4.76805
				26.8056	-6.16805
				26.7398	-7.57489
				25.1367	-8.62128
				22.6444	-9.0444
				19.6217	-8.77904
				16.0175	-7.93874
				11.6308	-6.76731
				6.47395	-5.5193
				1.04688	-4.34284
				-3.80539	-3.30317
				-7.37996	-2.45722
				-9.37212	-1.81066
				-9.69965	-1.25589
				-8.29517	-0.684194
				-5.23708	-0.153643
				-1.04727	0.140236
				3.2857	0.0376462
				6.54441	-0.457607
				7.57427	-1.15989
				5.82497	-1.8196
				1.91351	-2.28504
				-2.63651	-2.54212
				-6.43884	-2.63753
				-9.01805	-2.59925
				-10.6823	-2.40298
				-11.8858	-1.9851
				-12.8139	-1.31588
				-13.4084	-0.470532
				-13.6186	0.405199
				-13.595	1.16664
				-13.5897	1.70804
				-13.7929	2.05761
				-14.3275	2.43936
				-15.1929	3.07568
				-16.221	3.90301
				-17.1025	4.56758
				-17.2649	4.68263
				-15.9539	4.07684
				-12.9342	2.88875
				-9.08569	1.52075
				-6.01031	0.474582
				-5.05201	0.121744
				-6.56025	0.55885
				-9.69421	1.61488
				-13.026	2.98882
				-15.6694	4.41921
				-17.7476	5.71442
				-19.8277	6.72105
				-22.2367	7.36185
				-24.8522	7.58274
				-27.2541	7.23746
				-28.9891	6.20672
				-29.626	4.66592
				-28.6297	3.14455
				-25.4602	2.36386
				-19.8719	3.05484
				-12.1942	5.67444
				-3.68564	9.86058
				3.42428	14.0573
				6.77388	16.0423
				5.1484	14.2363
				-0.715399	8.73528
				-8.39485	1.23291
				-15.079	-6.02921
				-18.9182	-11.4581
				-19.5267	-14.6581
				-17.7284	-16.0956
				-14.9167	-16.3821
				-12.3066	-15.9124
				-10.4752	-14.9346
				-9.38856	-13.637
				-8.70419	-12.1511
				-7.96804	-10.619
				-6.59232	-9.27744
				-3.91828	-8.25487
				0.595338	-7.0755
				7.43073	-4.46427
				16.9712	0.990591
				28.6874	9.49424
				40.2849	19.0868
				48.1079	26.144
				48.7567	27.1566
				40.9326	20.6723
				26.4221	8.26709
				9.35685	-6.31649
				-5.92618	-19.3259
				-16.6355	-28.4084
				-21.8347	-32.5725
				-22.0523	-31.9721
				-18.6924	-27.926
				-13.2401	-22.4108
				-6.83179	-17.059
				-0.394317	-12.5422
				5.22303	-8.78926
				9.42619	-5.57498
				12.041	-2.793
				13.1736	-0.339721
				13.0434	1.95492
				12.1029	4.16516
				11.1168	6.15402
				10.8102	7.69432
				11.4301	8.64623
				12.7208	9.00803
				14.1707	8.86631
				15.2743	8.33697
				15.8111	7.58096
				15.8803	6.85624
				15.5977	6.44472
				14.963	6.44422
				14.0734	6.6582
				13.2707	6.75193
				12.9218	6.5144
				13.0604	5.95496
				13.3409	5.20515
				13.2622	4.41725
				12.443	3.76053
				10.9132	3.40165
				9.10057	3.40132
				7.32922	3.662
				5.45068	4.01522
				3.26405	4.29702
				1.20161	4.32065
				0.159738	3.92033
				0.538539	3.11115
				1.68222	2.15518
				2.32185	1.44625
				1.43304	1.32721
				-1.26563	1.93917
				-5.30441	3.11843
				-9.66329	4.41115
				-13.0767	5.31132
				-14.5569	5.59757
				-13.9251	5.44901
				-11.7841	5.19917
				-8.91361	5.00488
				-5.83732	4.81009
				-2.91472	4.48672
				-0.516491	3.85712
				1.0183	2.75112
				1.50468	1.19243
				0.941971	-0.561993
				-0.529646	-2.19975
				-2.60383	-3.51309
				-4.78147	-4.41596
				-6.66249	-4.92907
				-8.35524	-5.17978
				-10.2749	-5.22803
				-12.5854	-4.7732
				-15.0686	-3.19744
				-17.2577	-0.0852469
				-18.7702	4.19697
				-19.7774	8.36475
				-20.6997	10.7953
				-21.3388	10.4926
				-20.7318	7.57031
				-17.7358	2.93736
				-11.7304	-2.2344
				-3.39747	-6.85044
				4.77719	-10.1623
				9.1191	-11.9141
				6.58301	-12.1924
				-3.31223	-11.1705
				-17.5195	-9.01754
				-29.9725	-5.93954
				-33.7192	-2.28094
				-23.8665	1.22625
				0.348615	3.20343
				35.2365	2.01886
				73.6252	-2.92802
				106.66	-10.2956
				126.409	-17.4978
				128.529	-22.2733
				113.387	-23.64
				84.894	-21.8211
				48.2429	-17.6135
				8.46786	-11.7763
				-29.5592	-4.74255
				-60.7998	3.36242
				-80.7925	12.4499
				-87.5774	21.8636
				-83.1334	29.7408
				-72.4069	33.3233
				-60.3224	30.5831
				-49.414	21.7976
				-39.8688	9.50714
				-31.015	-2.87192
				-22.3204	-12.4565
				-13.5847	-17.7215
				-5.10916	-18.7174
				2.26634	-16.6637
				7.78336	-13.1679
				11.506	-9.50018
				14.3029	-6.20445
				17.0943	-3.17389
				20.0716	-0.0912618
				22.4316	3.13112
				22.7491	6.23492
				19.8331	8.74076
				13.5453	10.0253
				4.99071	9.4604
				-3.9411	6.89125
				-11.2951	3.01685
				-15.7975	-0.949241
				-17.3844	-3.96249
				-17.1115	-5.48932
				-16.5311	-5.51314
				-16.9681	-4.39484
				-18.9111	-2.63189
				-21.774	-0.650767
				-24.1707	1.28082
				-24.4719	3.03774
				-21.441	4.57176
				-14.8303	5.83651
				-5.65494	6.6459
				4.20819	6.69736
				12.9957	6.15399
				19.9531	6.35457
				25.5458	9.54837
				30.6555	17.1598
				35.1593	27.8509
				37.3794	37.6277
				35.2282	42.1717
				27.7427	39.1158
				15.3325	28.4874
				-0.837377	11.8924
				-18.8466	-7.79141
				-35.8551	-26.3842
				-49.1166	-39.6676
				-57.3999	-45.3686
				-61.1689	-43.9187
				-61.5407	-37.6687
				-59.2024	-29.503
				-53.943	-21.7063
				-44.7172	-15.5258
				-30.1384	-11.3172
				-9.5322	-8.84601
				15.5633	-7.5585
				40.6477	-6.82749
				59.8653	-6.09828
				69.312	-4.99158
				69.1135	-3.44523
				62.673	-1.7032
				54.3176	-0.0732632
				47.3323	1.29992
				43.238	2.51252
				42.0612	3.89587
				42.9091	5.93326
				44.3186	9.00718
				44.4185	12.9711
				41.407	16.8087
				34.6571	18.8851
				25.6651	17.9462
				17.554	14.006
				13.3279	8.20372
				14.3826	2.00329
				20.0902	-3.39771
				28.0888	-7.25318
				34.9234	-9.27128
				37.2859	-9.59372
				33.6689	-8.74423
				25.2463	-7.45042
				15.2592	-6.36638
				7.69899	-5.87723
				6.00894	-6.06911
				11.654	-6.77562
				23.1614	-7.64902
				36.6405	-8.28475
				47.4828	-8.35337
				52.233	-7.69436
				49.7737	-6.38007
				41.2611	-4.67231
				29.1748	-2.8704
				16.2908	-1.20791
				4.83861	0.156782
				-3.94944	1.12982
				-9.62628	1.71577
				-12.2452	2.08014
				-12.779	2.48473
				-13.604	3.08983
				-17.7523	3.88238
				-27.3049	4.82623
				-42.7908	6.04282
				-64.0951	7.8181
				-91.1885	10.3872
				-123.67	13.6853
				-160.189	17.3362
				-198.443	20.8768
				-235.078	23.9817
				-265.299	26.4824
				-283.301	28.157
				-284.163	28.5393
				-265.995	27.0844
				-230.899	23.6853
				-184.523	19.0167
				-134.352	14.2335
				-86.9866	10.2432
				-45.7083	7.2105
				-9.95194	4.66423
				22.9956	2.00217
				55.512	-1.10023
				88.4978	-4.6515
				122.223	-8.57698
				157.015	-12.8374
				191.767	-17.1725
				222.01	-20.8834
				240.874	-23.1527
				242.781	-23.587
				226.556	-22.3927
				195.739	-20.1153
				156.485	-17.201
				114.761	-13.7655
				74.9123	-9.85239
				40.6499	-5.87778
				16.6202	-2.69072
				7.53965	-1.15015
				14.9271	-1.58242
				34.8244	-3.54756
				58.9349	-6.07907
				78.0703	-8.15853
				85.3673	-9.07821
				78.0018	-8.56089
				57.454	-6.69942
				28.7396	-3.89183
				-0.991074	-0.842638
				-24.2221	1.55123
				-35.1519	2.54979
				-31.7682	1.96215
				-17.1741	0.27702
				0.289059	-1.52842
				8.56851	-2.33706
				-3.9042	-1.3325
				-41.8405	1.57603
				-98.2022	5.65535
				-154.886	9.62901
				-190.063	12.0986
				-189.027	12.0385
				-152.264	9.34032
				-95.5156	5.07558
				-41.6288	1.02285
				-8.9319	-1.37683
				-3.06103	-1.73232
				-16.7565	-0.609775
				-36.3146	0.961509
				-49.3327	1.96156
				-49.1152	1.75003
				-34.8975	0.293014
				-10.0757	-1.88009
				19.561	-4.00096
				47.4058	-5.45105
				67.6937	-5.99913
				76.9309	-5.80292
				74.6984	-5.19178
				63.5291	-4.44186
				47.7457	-3.73747
				31.8337	-3.20298
				19.1963	-2.87429
				11.5847	-2.70636
				9.13917	-2.67638
				10.955	-2.8129
				15.7758	-3.05636
				22.4533	-3.21662
				30.1453	-3.14796
				38.183	-2.8238
				45.7595	-2.21173
				51.7886	-1.24146
				55.0073	0.0344582
				54.3643	1.36138
				49.6438	2.44219
				41.9195	3.05594
				33.4065	2.97137
				26.6077	1.94229
				23.3082	-0.103857
				24.2923	-2.93403
				29.7502	-6.01185
				39.7387	-8.52674
				54.5801	-9.49263
				74.8629	-8.04547
				100.355	-3.86434
				128.324	2.59055
				152.506	9.93712
				163.759	15.652
				153.485	16.8227
				118.52	12.2624
				63.3817	3.6639
				-1.57992	-5.64734
				-63.8243	-12.6496
				-112.4	-15.7254
				-141.053	-15.0401
				-149.305	-12.168
				-141.093	-8.94876
				-122.334	-6.4655
				-99.0833	-4.82023
				-76.6508	-3.48551
				-59.3294	-1.83612
				-50.4979	0.450748
				-52.5341	3.36168
				-65.9768	6.73254
				-88.4033	10.3
				-114.381	13.6152
				-137.129	16.1102
				-150.983	17.3773
				-153.251	17.3744
				-144.542	16.3627
				-127.513	14.7099
				-105.158	12.7676
				-79.8767	10.8619
				-53.3642	9.26847
				-26.934	8.07219
				-2.00894	7.07817
				19.7884	6.00481
				37.1925	4.77674
				49.951	3.5161
				58.6699	2.32114
				63.6	1.274
				63.6463	0.629942
				57.121	0.717242
				43.7331	1.57642
				25.7075	2.83574
				7.02935	3.93362
				-8.29219	4.41881
				-17.6737	4.14682
				-20.5077	3.29159
				-17.8643	2.17853
				-11.6687	1.04387
				-3.70943	-0.0913899
				4.93681	-1.271
				13.7039	-2.40319
				22.0574	-3.34766
				29.4214	-4.11599
				35.3752	-4.86251
				39.6004	-5.70169
				41.7411	-6.55845
				41.6624	-7.19451
				39.785	-7.37946
				36.8608	-7.04374
				33.4067	-6.33983
				29.4952	-5.61085
				25.2032	-5.23527
				21.4568	-5.36362
				20.4987	-5.6852
				25.2116	-5.48649
				37.4668	-4.13133
				56.5296	-1.66742
				78.549	0.955121
				97.4864	2.34128
				107.045	1.55575
				102.752	-1.24951
				83.3918	-5.01491
				51.3593	-8.44604
				12.0427	-10.5805
				-27.4675	-11.107
				-60.226	-10.4079
				-81.5552	-9.16762
				-90.459	-7.83879
				-89.2934	-6.55284
				-82.0764	-5.36154
				-72.8686	-4.26947
				-64.7107	-3.13135
				-58.6391	-1.67689
				-52.9291	0.437588
				-43.4101	3.48312
				-25.3514	7.28804
				3.43157	10.975
				39.852	13.2066
				75.3646	12.8382
				98.9094	9.5534
				101.386	4.15211
				79.4555	-1.72696
				36.9968	-6.37253
				-16.5674	-8.70383
				-70.0805	-8.49669
				-114.158	-6.2589
				-142.759	-2.99099
				-153.293	0.14407
				-146.359	2.23488
				-125.333	2.93394
				-95.4922	2.49415
				-62.6298	1.52231
				-31.3834	0.620739
				-3.88828	0.134685
				20.4553	0.00960114
				43.9567	-0.193658
				68.8844	-0.948349
				95.8902	-2.3361
				123.433	-4.02312
				148.286	-5.57361
				166.661	-6.64702
				175.471	-6.99636
				173.402	-6.53499
				161.471	-5.39897
				142.488	-3.8065
				119.161	-1.88403
				92.4541	0.382488
				62.1122	3.14042
				28.5414	6.58447
				-5.86762	10.6344
				-36.7238	14.5478
				-58.937	17.0467
				-68.8545	17.0692
				-65.9512	14.4458
				-52.9505	9.98447
				-34.5876	5.20677
				-16.0978	2.00571
				-2.17247	2.10702
				3.50477	6.29149
				-1.67372	13.6189
				-19.0509	21.2272
				-47.4993	25.6065
				-81.8226	25.0506
				-113.74	20.8451
				-136.33	15.6369
				-147.884	10.9501
				-151.399	6.5316
				-150.809	1.4454
				-147.478	-4.69539
				-139.526	-11.2649
				-124.502	-17.1867
				-102.518	-21.9193
				-76.2582	-25.581
				-48.4649	-28.234
				-20.4923	-29.6107
				6.87422	-29.528
				32.2664	-28.1452
				53.5799	-25.7721
				68.2405	-22.6191
				73.7704	-18.7584
				69.0699	-14.2345
				55.457	-9.2138
				36.2245	-4.07998
				15.2539	0.624364
				-3.92483	4.41965
				-18.2185	7.10016
				-24.9412	8.71727
				-22.4945	9.41575
				-11.4538	9.3897
				5.0847	8.91731
				22.2471	8.28024
				34.8347	7.63595
				39.158	7.02225
				34.5122	6.50347
				23.4238	6.23047
				10.6371	6.26129
				1.47161	6.38689
				0.181777	6.24639
				8.80296	5.60219
				26.7176	4.42422
				50.8248	2.77323
				76.3078	0.850251
				97.9714	-0.710261
				111.668	-0.746734
				115.222	1.95504
				108.357	7.71737
				91.6152	15.1022
				65.543	21.0739
				31.6641	22.65
				-5.46625	18.828
				-37.7073	10.9697
				-55.6878	1.48885
				-52.9353	-7.64024
				-29.2409	-15.3429
				8.72074	-21.0492
				49.4941	-24.3214
				80.508	-24.9347
				92.3273	-23.0754
				81.9897	-19.2761
				53.5782	-14.2316
				15.8902	-8.6865
				-21.1866	-3.31807
				-49.9434	1.35208
				-66.5913	4.91361
				-71.0215	7.04752
				-65.4543	7.68665
				-53.1763	7.18045
				-37.5729	6.18189
				-21.2914	5.24524
				-5.74702	4.47706
				8.98426	3.58126
				24.1635	2.18504
				42.0325	0.0961622
				64.2814	-2.56668
				89.7439	-5.31467
				113.467	-7.4469
				128.438	-8.40529
				128.923	-8.0539
				113.311	-6.72141
				84.6651	-4.95683
				48.8835	-3.1376
				12.1625	-1.29596
				-20.8089	0.682531
				-47.6097	2.75786
				-67.655	4.69516
				-81.2152	6.2734
				-88.8279	7.36683
				-91.019	7.80001
				-88.2621	7.34104
				-81.396	5.9536
				-72.0746	3.94806
				-62.7152	1.84334
				-55.8565	0.153643
				-53.2189	-0.749478
				-54.985	-0.736808
				-59.7161	0.0500814
				-64.8815	1.28951
				-67.6127	2.60738
				-65.5338	3.66905
				-57.8415	4.27644
				-46.2783	4.46961
				-34.8985	4.50396
				-27.9643	4.6593
				-27.0665	5.04325
				-29.9927	5.57417
				-32.6349	6.15651
				-32.0672	6.82322
				-27.9217	7.59462
				-21.4349	8.24676
				-13.8358	8.44405
				-5.94043	8.03176
				0.985673	6.87338
				4.83384	4.6161
				3.67115	1.14175
				-2.80447	-2.91736
				-12.5409	-6.47275
				-21.641	-8.64094
				-26.008	-9.11822
				-23.2177	-8.25781
				-13.3991	-6.87295
				1.39141	-5.79175
				18.5181	-5.47954
				35.5922	-5.9574
				50.5965	-6.92989
				61.896	-7.97516
				68.367	-8.69792
				69.4953	-8.78352
				65.2409	-7.98951
				55.7117	-6.1791
				40.968	-3.47685
				21.241	-0.466921
				-2.20455	1.96912
				-25.6824	3.42666
				-42.5877	4.6258
				-45.7013	6.64538
				-31.4602	9.00361
				-2.35	9.32198
				33.927	5.80341
				66.1128	-0.720189
				81.6474	-7.60631
				71.2837	-12.2388
				34.4192	-13.0826
				-19.1621	-10.1524
				-73.2328	-4.95719
				-112.322	0.324332
				-127.409	3.97581
				-117.233	5.34763
				-86.0157	4.6622
				-40.4696	2.48415
				11.9003	-0.609758
				63.2371	-4.05102
				105.78	-7.18543
				133.154	-9.31868
				142.02	-9.95895
				133.11	-9.04584
				110.882	-6.96857
				81.5951	-4.32558
				50.6889	-1.55147
				21.3998	1.27948
				-4.35194	4.26056
				-24.3884	7.25778
				-36.3038	9.76309
				-39.1085	11.1676
				-34.5606	11.1478
				-26.5242	9.81509
				-18.5419	7.59057
				-11.6507	4.99307
				-4.08228	2.48054
				7.37338	0.33183
				24.9849	-1.37488
				47.3118	-2.59236
				67.9166	-3.09977
				77.0849	-2.49622
				65.7305	-0.401322
				29.5854	3.29785
				-28.0838	8.33241
				-96.7551	14.0631
				-161.771	19.5158
				-208.014	23.4907
				-222.674	24.7755
				-198.288	22.4581
				-136.884	16.3839
				-52.5309	7.51452
				31.737	-2.28471
				92.8721	-10.9928
				117.64	-17.1478
				106.967	-20.1585
				72.6385	-20.2826
				29.8443	-18.4345
				-9.22056	-15.8168
				-38.0153	-13.3366
				-54.8856	-11.0679
				-60.762	-8.15374
				-57.2632	-3.29797
				-45.9721	4.34066
				-28.8399	14.1562
				-9.23101	23.4359
				8.21008	28.2032
				19.8327	25.827
				24.8541	16.8583
				24.7232	4.27128
				21.5477	-8.29475
				17.2833	-17.7332
				13.3802	-22.3806
				10.6636	-22.5297
				9.68554	-19.8852
				11.079	-16.3332
				15.3868	-13.0752
				22.6209	-10.5063
				31.8257	-8.4982
				40.7931	-6.74565
				46.5376	-5.0332
				46.5972	-3.34144
				40.0987	-1.79576
				27.9629	-0.549405
				12.5928	0.324305
				-2.62532	0.884369
				-14.0776	1.29252
				-19.0231	1.72622
				-16.5883	2.26642
				-7.92116	2.79375
				4.63496	3.01179
				18.6883	2.67142
				32.3711	1.78811
				44.3333	0.581202
				53.8985	-0.749202
				61.241	-2.10597
				66.943	-3.39909
				71.2782	-4.42226
				74.0133	-4.898
				74.7221	-4.72195
				72.8734	-4.06556
				67.5041	-3.14728
				57.3199	-1.99423
				41.6093	-0.477165
				21.1615	1.46356
				-1.69044	3.64206
				-23.8801	5.69152
				-42.4507	7.30054
				-54.8525	8.34277
				-59.0833	8.79351
				-54.0553	8.60211
				-39.8159	7.65805
				-17.5509	5.89274
				10.1078	3.49434
				38.5969	0.959026
				61.7724	-1.16982
				73.8518	-2.55056
				72.2457	-3.10473
				59.2037	-3.009
				40.7538	-2.58811
				23.7087	-2.12393
				12.9648	-1.76911
				10.2946	-1.59153
				14.182	-1.62101
				20.299	-1.84863
				22.7911	-2.17223
				16.4123	-2.3287
				-0.747113	-1.99018
				-25.2156	-1.07842
				-49.057	0.0300957
				-64.317	0.756826
				-68.1353	0.886793
				-64.601	0.963905
				-61.7083	2.149
				-65.4921	5.52022
				-76.2844	11.211
				-90.2181	17.9268
				-103.082	23.2428
				-111.86	24.7712
				-113.905	21.4884
				-106.481	14.0711
				-87.4631	4.15038
				-56.2552	-6.45541
				-14.6673	-15.997
				32.1909	-22.9888
				76.0503	-26.6008
				107.425	-26.8193
				118.212	-24.1253
				103.87	-19.1597
				65.3769	-12.7228
				10.2623	-5.8346
				-49.0166	0.416286
				-99.3114	5.17995
				-131.178	8.09291
				-140.993	9.23718
				-130.5	8.8861
				-105.117	7.37054
				-72.0485	5.1149
				-38.7232	2.69355
				-11.9114	0.837789
				3.17851	0.242341
				4.48969	1.15219
				-6.13488	3.12196
				-25.0625	5.34377
				-50.4408	7.34479
				-83.0276	9.29435
				-122.969	11.5783
				-165.984	14.2163
				-202.558	16.6824
				-220.741	18.1166
				-210.973	17.7007
				-170.302	14.9939
				-104.046	10.1903
				-24.7667	4.2398
				51.0884	-1.42407
				108.624	-5.51102
				140.116	-7.42349
				147.52	-7.40659
				140.198	-6.27381
				129.182	-4.903
				121.353	-3.82933
				116.995	-3.1329
				111.822	-2.58803
				101.471	-1.94737
				84.9321	-1.14078
				64.6997	-0.269846
				44.5971	0.47131
				27.9253	0.885062
				17.0672	0.879047
				13.6203	0.49716
				18.3021	-0.155382
				30.8025	-1.03731
				49.6474	-2.24229
				72.1155	-3.8763
				94.481	-5.84551
				112.547	-7.77033
				122.331	-9.0635
				120.989	-9.20158
				107.866	-8.12563
				85.1928	-6.37757
				57.8949	-4.71652
				32.2557	-3.61641
				13.5939	-3.1656
				4.02289	-3.23851
				1.7536	-3.56004
				2.57261	-3.7412
				2.55149	-3.48864
				0.0799252	-2.83222
				-3.81722	-2.11068
				-6.32313	-1.72585
				-3.78348	-1.92747
				7.46774	-2.81708
				29.7748	-4.48895
				62.5361	-7.04686
				101.761	-10.3666
				141.461	-13.9064
				175.886	-16.846
				201.004	-18.3612
				214.473	-17.8743
				214.91	-15.3414
				201.735	-11.4359
				175.842	-7.33219
				140.224	-4.0803
				99.2732	-2.039
				56.4979	-0.850075
				12.7485	0.159891
				-32.691	1.60635
				-78.456	3.76131
				-117.65	6.20897
				-137.791	7.69758
				-125.141	6.57675
				-71.4624	1.71581
				19.6473	-6.67572
				129.718	-16.8371
				228.126	-25.9089
				281.307	-30.8065
				266.152	-29.3087
				180.893	-21.0293
				45.4326	-7.62887
				-109.973	8.05171
				-259.137	23.3172
				-387.955	36.3508
				-493.573	46.0527
				-577.681	51.7526
				-638.706	53.3218
				-668.99	51.234
				-659.514	46.2571
				-606.835	39.1469
				-516.145	30.6503
				-400.278	21.6503
				-276.215	13.1469
				-159.879	5.99241
				-62.0018	0.601755
				12.5273	-3.07878
				63.2127	-5.34287
				92.844	-6.49418
				106.687	-6.80703
				110.96	-6.59262
				110.988	-6.16667
				110.222	-5.71811
				110.701	-5.25169
				114.206	-4.73523
				122.643	-4.35783
				137.301	-4.56181
				158.022	-5.72845
				182.814	-7.85457
				207.632	-10.4987
				226.874	-12.921
				235.4	-14.316
				230.832	-14.1519
				214.337	-12.5025
				189.636	-10.0897
				160.969	-7.83437
				131.112	-6.17882
				100.926	-4.8441
				70.5943	-3.27761
				40.9281	-1.25953
				13.5048	0.899267
				-9.93587	2.59208
				-28.103	3.31695
				-40.762	2.97345
				-49.1681	1.93037
				-55.7713	1.01161
				-62.9437	1.4081
				-71.1471	4.13104
				-78.1659	9.08013
				-80.6856	14.6239
				-76.603	18.296
				-66.0462	18.1867
				-51.485	14.0402
				-37.3149	7.2844
				-28.1724	0.0954578
				-26.3345	-5.71265
				-30.0625	-9.37288
				-34.4659	-11.1631
				-34.586	-11.7894
				-28.3173	-11.7519
				-16.7368	-11.1931
				-2.20576	-10.1179
				13.27	-8.6439
				28.377	-7.03607
				42.3597	-5.53477
				55.0349	-4.27565
				67.1042	-3.4292
				80.5025	-3.28692
				97.8142	-4.0553
				120.432	-5.5672
				146.683	-7.34187
				171.413	-8.92586
				187.749	-10.0153
				190.457	-10.3663
				178.677	-9.87308
				155.944	-8.71888
				127.814	-7.30131
				99.0182	-5.97116
				71.8339	-4.81838
				46.4804	-3.69209
				22.9148	-2.39317
				2.38291	-0.887632
				-12.3008	0.546357
				-17.4983	1.40879
				-9.99615	1.2835
				11.4208	0.0444163
				44.3391	-2.12404
				81.7177	-4.7307
				112.562	-7.02428
				124.977	-8.18619
				110.739	-7.59721
				69.2089	-5.08338
				8.53746	-1.04823
				-56.7712	3.64534
				-111.293	8.04562
				-144.41	11.6148
				-153.101	14.5441
				-140.664	17.4373
				-113.525	20.399
				-79.2158	22.2909
				-45.7372	21.1487
				-20.1991	15.7798
				-6.466	7.04929
				-4.05814	-2.46261
				-9.74605	-10.0186
				-20.4351	-14.0788
				-34.6857	-14.5416
				-51.5158	-12.1961
				-67.8568	-8.2685
				-77.8548	-4.19387
				-75.7308	-1.21312
				-60.3202	0.116485
				-37.2714	0.131986
				-16.6425	-0.203624
				-7.61681	0.0261002
				-13.7902	1.12446
				-31.2914	2.73786
				-50.5065	4.19393
				-61.1386	4.91575
				-58.5125	4.73467
				-47.1609	3.98874
				-38.7818	3.41583
				-45.4133	3.86788
				-71.7877	5.77942
				-111.686	8.69317
				-151.245	11.4406
				-177.338	12.9437
				-184.479	12.8978
				-175.418	11.7805
				-157.631	10.3855
				-140.242	9.45071
				-131.528	9.50229
				-135.589	10.6729
				-149.749	12.5659
				-165.279	14.4245
				-171.613	15.5022
				-161.618	15.3365
				-134.818	13.8251
				-96.8861	11.22
				-56.2143	8.09309
				-20.1016	5.13471
				7.27079	2.7926
				24.9384	1.05988
				34.4678	-0.378786
				39.1225	-1.82407
				42.776	-3.37137
				48.7356	-4.94459
				58.7746	-6.43775
				72.1116	-7.75674
				84.7496	-8.70439
				90.7668	-8.95455
				85.7162	-8.25815
				69.8275	-6.72431
				48.6132	-4.95276
				30.3718	-3.78676
				22.342	-3.77404
				28.1394	-4.86892
				47.3585	-6.4921
				76.3501	-7.5539
				109.32	-6.61552
				139.509	-2.71112
				160.448	3.44566
				167.522	9.04348
				159.691	10.6035
				140.423	6.47413
				116.869	-2.09454
				97.4837	-12.2691
				89.2864	-21.556
				96.0655	-28.5835
				117.867	-32.9567
				151.12	-34.9829
				189.201	-35.3356
				224.045	-34.6304
				248.824	-33.1875
				260.218	-31.0912
				258.688	-28.3951
				246.511	-25.2475
				225.106	-21.8065
				194.002	-18.0339
				152.619	-13.7024
				103.066	-8.7231
				50.4951	-3.34559
				0.368474	2.05206
				-44.1546	7.17259
				-82.1428	11.6984
				-113.275	15.2224
				-137.399	17.5237
				-156.018	18.8754
				-173.137	19.9018
				-192.781	21.0951
				-214.796	22.5064
				-233.042	23.7775
				-237.816	24.3112
				-221.286	23.5152
				-182.766	21.1271
				-130.206	17.4139
				-76.76	13.0971
				-34.6241	9.08085
				-9.73541	6.06375
				-0.12629	4.22099
				1.64289	3.22425
				4.13619	2.52175
				13.3992	1.5861
				30.831	0.100478
				52.5616	-1.83083
				71.1524	-3.65878
				79.7878	-4.79918
				76.5077	-5.12372
				65.5335	-4.99543
				55.4677	-4.9433
				55.4895	-5.35829
				70.7458	-6.3466
				99.3245	-7.70175
				132.41	-8.94563
				157.011	-9.47759
				160.178	-8.80114
				133.547	-6.65652
				77.0653	-3.06302
				0.804574	1.55381
				-77.1856	6.25524
				-137.797	9.86056
				-169.145	11.5479
				-170.995	11.2482
				-153.006	9.52646
				-128.778	7.1819
				-109.763	4.91806
				-101.953	3.22148
				-105.637	2.43151
				-116.934	2.84475
				-130.026	4.65478
				-139.61	7.77684
				-142.782	11.7929
				-139.365	15.9853
				-130.47	19.2426
				-116.012	20.1735
				-93.1295	18.0899
				-58.0711	14.174
				-11.3004	10.8916
				38.852	9.7135
				78.7855	9.87381
				97.2474	9.34911
				91.402	6.3977
				66.5977	0.454153
				31.5185	-7.43236
				-5.88632	-14.7378
				-39.0472	-18.5655
				-62.0033	-17.2603
				-69.5462	-11.4318
				-58.6133	-3.71933
				-30.644	2.35566
				6.62581	3.88683
				40.507	0.0981148
				57.9701	-7.16925
				50.8563	-14.738
				19.1938	-19.8529
				-28.7377	-21.1086
				-79.4681	-18.7462
				-118.808	-14.3746
				-136.311	-9.92733
				-128.931	-6.54051
				-102.262	-4.24834
				-67.6135	-2.50324
				-35.755	-0.867627
				-11.7036	0.649725
				5.3531	1.78704
				17.7611	2.5173
				25.3609	3.24062
				25.6478	4.40985
				17.8931	6.02671
				6.99314	7.52861
				2.99084	8.09546
				16.3225	7.08555
				52.1554	4.33632
				106.858	0.248148
				167.965	-4.31403
				218.193	-8.28839
				242.708	-10.7748
				235.857	-11.3015
				202.77	-9.92135
				155.176	-7.14071
				105.099	-3.70821
				60.6551	-0.382757
				25.5006	2.23271
				0.37079	3.78409
				-15.3777	4.20413
				-22.6718	3.69589
				-21.9205	2.57557
				-12.8421	1.0369
				4.63855	-0.888601
				28.6978	-3.11429
				54.6032	-5.32216
				75.6871	-7.0648
				85.7371	-7.98333
				81.2287	-7.89703
				62.4882	-6.77987
				33.6446	-4.72902
				1.35742	-1.98531
				-27.3857	1.00689
				-47.3856	3.62889
				-56.5479	5.32758
				-56.579	5.96904
				-52.5789	5.94694
				-50.5047	5.81997
				-53.5564	5.82747
				-60.552	5.8235
				-67.6337	5.58253
				-71.1476	5.01657
				-69.2604	4.18102
				-62.2472	3.27409
				-52.099	2.62417
				-41.46	2.49457
				-32.2772	2.83791
				-25.0529	3.29807
				-19.1149	3.44145
				-13.5	2.98063
				-7.62533	1.90763
				-1.33328	0.505728
				5.33522	-0.841907
				12.1904	-1.93711
				18.7423	-2.86065
				24.0655	-3.72532
				26.873	-4.36602
				25.7398	-4.40314
				19.3326	-3.57126
				6.85798	-1.89209
				-10.9342	0.358683
				-30.8168	2.73449
				-47.8801	4.73498
				-58.1771	5.97646
				-60.7086	6.33526
				-57.0697	5.93875
				-49.8124	5.01625
				-40.7685	3.81382
				-29.7087	2.57874
				-14.1986	1.39123
				8.5772	0.0180335
				38.9768	-1.85873
				73.2046	-4.23634
				104.183	-6.6549
				124.488	-8.41444
				129.421	-8.95082
				118.635	-8.15075
				95.8636	-6.40654
				67.0754	-4.34043
				37.9962	-2.40602
				12.2771	-0.698675
				-8.67731	0.913749
				-24.5753	2.53498
				-35.4998	4.12237
				-42.3039	5.56546
				-46.9616	6.8064
				-52.1849	7.88806
				-60.4499	8.89917
				-72.2046	9.78862
				-84.2194	10.2042
				-90.24	9.57968
				-84.0512	7.41534
				-62.6216	3.55336
				-27.671	-1.61402
				14.277	-7.08518
				53.3189	-11.5534
				79.3904	-13.9988
				86.3487	-14.1183
				74.5338	-12.3728
				50.0633	-9.72863
				21.4254	-7.15171
				-4.36169	-5.02875
				-23.827	-2.87429
				-36.5351	0.431654
				-43.2155	5.91659
				-44.6979	13.6031
				-41.8195	21.9609
				-34.839	28.2051
				-22.5944	29.2531
				-2.68695	22.9128
				27.2559	9.34429
				67.1986	-7.95379
				111.286	-23.3649
				146.053	-32.3751
				153.664	-33.8522
				119.721	-29.3747
				41.1863	-21.2287
				-69.9809	-11.5083
				-189.699	-2.17075
				-290.551	5.13629
				-352.192	9.52546
				-367.523	11.0905
				-342.01	10.6307
				-288.269	9.07588
				-219.983	7.06216
				-148.225	4.78752
				-80.6488	2.11274
				-21.7935	-1.00813
				26.7784	-4.03953
				66.0793	-5.91423
				98.2786	-5.78666
				125.124	-3.85509
				147.632	-1.34265
				166.732	0.368363
				183.603	0.54742
				199.237	-0.679913
				213.377	-2.62262
				223.695	-4.47771
				226.414	-5.68069
				218.571	-6.08813
				200.337	-5.93533
				175.443	-5.54564
				149.397	-5.06241
				127.086	-4.51079
				111.373	-4.02485
				102.589	-3.81276
				98.2111	-3.89002
				93.0641	-3.96445
				80.7684	-3.5512
				55.6202	-2.1214
				13.4578	0.769091
				-47.36	5.25371
				-122.976	10.8545
				-201.215	16.4178
				-263.097	20.4867
				-289.246	21.8192
				-267.703	19.732
				-199.056	14.3281
				-96.8401	6.61569
				16.2998	-1.68377
				115.19	-8.68155
				179.191	-12.9362
				197.106	-13.7975
				168.929	-11.4246
				105.184	-6.61097
				23.79	-0.50967
				-56.0832	5.68461
				-120.823	11.0377
				-165.416	15.0694
				-191.568	17.7158
				-203.804	19.1232
				-206.536	19.4942
				-203.036	19.0467
				-195.477	17.9883
				-184.823	16.4923
				-170.367	14.6819
				-150.036	12.6083
				-122.294	10.3147
				-88.2161	8.00256
				-51.1508	6.06857
				-14.1768	4.88069
				21.7902	4.43844
				57.743	4.09445
				95.4767	2.63749
				136.913	-0.976124
				183.3	-6.75104
				233.577	-13.6347
				282.737	-20.2926
				321.78	-25.666
				339.596	-28.9574
				326.148	-29.5543
				276.953	-27.2634
				197.482	-22.6073
				103.035	-16.7469
				12.8076	-11.0524
				-57.1897	-6.6838
				-98.2432	-4.3077
				-109.923	-3.92574
				-98.5488	-4.92893
				-73.6408	-6.3913
				-44.031	-7.418
				-15.3763	-7.45359
				10.325	-6.4882
				33.6936	-4.97424
				56.0718	-3.53347
				77.1372	-2.81571
				93.1042	-3.36068
				97.032	-5.12137
				81.579	-7.1633
				43.5573	-8.18087
				-11.9544	-7.44268
				-71.8119	-5.28616
				-120.559	-2.76783
				-148.211	-0.79843
				-154.824	0.481168
				-148.904	1.57551
				-140.955	3.02125
				-136.446	4.9274
				-132.543	6.90313
				-120.553	8.19334
				-92.3778	7.97229
				-46.8885	5.83041
				7.77092	2.17178
				57.5165	-1.8429
				89.1594	-4.80905
				96.2245	-5.73945
				80.2077	-4.46768
				47.4657	-1.5107
				5.29734	2.41794
				-39.9228	6.71542
				-83.0177	10.8844
				-119.766	14.4871
				-146.321	17.1265
				-159.142	18.4475
				-155.898	18.2392
				-136.591	16.5693
				-104.51	13.8635
				-66.557	10.8585
				-31.3939	8.30884
				-5.50469	6.59937
				9.56382	5.6284
				16.2445	5.03289
				17.9591	4.4591
				17.1211	3.66029
				14.8094	2.53864
				11.312	1.22031
				6.89926	-0.0393536
				2.40168	-1.10326
				-0.600767	-2.01185
				-0.103629	-2.83689
				5.44408	-3.57647
				16.3137	-4.14314
				31.5581	-4.44194
				49.6335	-4.49861
				68.3688	-4.4186
				84.5768	-4.20361
				95.0516	-3.79412
				98.6197	-3.37778
				96.5019	-3.53262
				90.5007	-4.88772
				81.9559	-7.54742
				72.6344	-10.8541
				65.32	-13.7261
				62.8276	-15.2934
				66.345	-15.318
				74.1803	-14.0452
				81.9256	-11.7486
				84.5088	-8.56427
				79.0422	-4.67106
				66.4577	-0.451489
				50.7321	3.49475
				36.4648	6.47774
				26.6177	8.02606
				21.3067	8.22966
				17.6599	7.79833
				11.1597	7.67891
				-1.61991	8.46118
				-21.1094	10.0572
				-45.8575	11.9533
				-75.2909	13.768
				-110.93	15.5018
				-154.92	17.3121
				-206.668	19.2253
				-259.359	21.0147
				-299.38	22.1202
				-310.618	21.6714
				-281.593	18.8619
				-211.064	13.4653
				-109.138	5.9916
				5.67952	-2.55475
				111.506	-10.9674
				189.457	-18.051
				230.323	-22.881
				237.799	-25.0821
				225.417	-24.9245
				208.87	-23.1687
				198.317	-20.7743
				194.641	-18.625
				191.107	-17.373
				178.973	-17.4038
				153.151	-18.7128
				114.046	-20.5195
				65.5935	-21.0578
				12.6029	-18.2637
				-40.4006	-11.1686
				-88.8026	-0.768838
				-127.461	10.4804
				-151.757	20.0421
				-160.028	26.4098
				-155.282	29.4007
				-143.666	29.7414
				-130.1	28.3124
				-115.072	25.6149
				-95.6717	21.8119
				-69.4567	17.1099
				-37.4323	11.9809
				-4.06093	7.01958
				25.1306	2.66735
				46.6604	-0.919737
				61.065	-3.85197
				72.3205	-6.41511
				84.6885	-8.86733
				98.8166	-11.1773
				110.162	-12.9765
				111.446	-13.7848
				97.36	-13.2472
				67.9841	-11.2767
				28.7872	-8.19119
				-12.3004	-4.73107
				-48.2191	-1.78645
				-74.4526	0.0218475
				-89.6519	0.615137
				-96.255	0.414397
				-99.5958	0.0501826
				-104.163	0.0515564
				-109.411	0.587934
				-109.143	1.30271
				-95.4948	1.45119
				-64.5721	0.362277
				-19.9169	-2.09643
				28.2526	-5.40067
				67.6061	-8.65696
				89.116	-10.981
				90.2462	-11.7492
				75.4318	-10.8609
				54.8611	-8.97905
				41.5677	-7.37049
				46.5908	-7.22655
				74.0073	-8.94471
				118.676	-11.9787
				167.779	-15.2477
				205.447	-17.6219
				218.632	-18.2641
				201.372	-16.8643
				155.644	-13.7318
				89.9711	-9.70315
				17.7804	-5.85615
				-45.3156	-3.05638
				-87.3833	-1.47072
				-106.672	-0.364391
				-112.381	1.48147
				-117.832	4.91983
				-131.891	9.90105
				-155.021	15.6217
				-181.056	20.9794
				-202	24.9385
				-212.383	26.887
				-210.98	27.0733
				-200.33	26.6934
				-185.419	27.2294
				-171.87	29.3743
				-163.741	32.3398
				-161.739	34.1956
				-162.681	33.0846
				-160.643	28.3169
				-149.516	20.583
				-125.721	11.4181
				-89.4798	2.44136
				-43.9036	-5.25517
				6.79283	-11.3787
				57.8173	-16.1868
				103.433	-19.8379
				138.031	-21.9418
				158.755	-21.6743
				167.139	-18.191
				168.13	-11.162
				167.152	-1.61755
				167.223	7.42918
				168.247	12.0345
				168.435	9.91525
				165.726	2.00183
				158.459	-8.54584
				145.969	-18.4121
				128.822	-25.3345
				108.169	-28.1726
				84.8672	-26.7774
				59.2534	-22.0811
				31.8234	-15.8627
				4.17909	-9.92178
				-20.8032	-5.2424
				-39.9612	-1.82592
				-51.2395	0.783646
				-54.4971	2.90511
				-51.3466	4.53888
				-44.2391	5.45478
				-35.4067	5.31633
				-26.3009	3.79757
				-17.7139	0.697292
				-10.1296	-3.73494
				-3.77768	-8.33485
				1.31714	-11.2283
				4.86871	-10.92
				5.92789	-7.21519
				3.25725	-1.19925
				-3.29	5.46025
				-11.1479	11.2553
				-15.0299	15.2051
				-9.44672	16.9036
				8.02447	16.4617
				35.3005	14.3567
				66.6784	11.2446
				94.608	7.82434
				111.381	4.71956
				111.169	2.41597
				92.3993	1.29022
				58.8512	1.52538
				18.31	2.87524
				-20.3216	4.64968
				-49.4265	6.01795
				-63.6391	6.24516
				-60.6418	4.73193
				-43.0079	1.17079
				-19.0668	-4.04035
				0.394192	-9.54872
				8.42155	-13.499
				5.74288	-14.5764
				-0.92446	-12.7827
				-3.76777	-9.26258
				1.8084	-5.46242
				15.4572	-2.36345
				33.1051	-0.251649
				49.5962	1.04994
				60.3313	1.93833
				61.4982	2.95317
				50.3133	4.63255
				25.9296	7.19201
				-9.17794	10.1678
				-48.3701	12.2568
				-82.5076	11.7318
				-104.123	7.58377
				-111.23	0.604109
				-107.995	-6.67267
				-101.715	-11.2227
				-98.1766	-11.1698
				-98.6342	-6.7655
				-99.8581	0.0765968
				-96.5328	7.3044
				-84.2924	13.8795
				-61.6778	19.6589
				-30.9491	24.3645
				1.78188	26.7847
				28.4554	25.244
				43.3035	19.0571
				46.0722	9.46606
				41.3718	-0.871951
				35.3621	-9.2888
				32.8746	-14.2881
				36.5652	-15.9709
				47.2549	-15.7157
				63.9339	-15.2806
				83.3479	-15.8074
				100.042	-17.365
				107.377	-19.187
				99.6358	-20.235
				74.3261	-19.7101
				33.0253	-17.3358
				-19.463	-13.3564
				-76.2074	-8.36741
				-128.813	-3.17212
				-168.56	1.34575
				-188.565	4.44477
				-185.994	5.7553
				-163.238	5.39883
				-127.49	3.93142
				-88.4462	2.07509
				-54.7185	0.448123
				-30.634	-0.529049
				-15.5112	-0.679851
				-5.93958	-0.123251
				1.31619	0.749805
				8.18868	1.41136
				15.5328	1.43996
				23.3329	0.749167
				30.8336	-0.382265
				36.9811	-1.51269
				40.9553	-2.31795
				42.3875	-2.72041
				41.2561	-2.76427
				37.7798	-2.40296
				32.4688	-1.43853
				26.1968	0.361779
				19.9699	3.04154
				14.2583	6.07027
				8.37797	7.90389
				0.838601	6.26247
				-8.71942	-0.0216723
				-17.4066	-8.79804
				-20.1495	-15.2652
				-13.9562	-15.8549
				-0.361945	-10.9408
				16.5313	-3.64872
				33.2425	2.86101
				48.0978	6.90425
				60.5163	8.3554
				70.0793	8.01851
				76.3957	6.897
				79.3105	5.71861
				78.7215	4.7804
				74.2239	4.04436
				65.3192	3.36739
				52.3824	2.71764
				37.6639	2.19767
				25.2016	1.87145
				19.2428	1.69896
				22.1911	1.63555
				33.5054	1.59573
				49.9683	1.36822
				66.8098	0.782729
				79.0509	-0.0389292
				82.8382	-0.696809
				76.5231	-0.816136
				60.7688	-0.316046
				37.5425	0.643425
				9.12279	1.8799
				-21.9494	3.27324
				-52.3745	4.68471
				-77.8139	5.88671
				-93.1649	6.76445
				-93.6842	7.72602
				-76.8473	9.69542
				-44.0689	13.2521
				-1.40412	17.6306
				41.3477	20.8181
				73.3826	20.6486
				86.7408	15.857
				79.2057	6.78066
				54.2062	-4.57528
				17.9267	-15.4008
				-24.0494	-23.0337
				-68.5071	-25.4985
				-114.031	-22.1398
				-158.695	-14.0716
				-198.134	-3.78363
				-225.929	5.82059
				-236	12.4084
				-225.426	14.8773
				-196.236	13.4654
				-155.167	9.43517
				-111.246	4.48108
				-72.3262	-0.0052725
				-42.388	-3.37695
				-20.882	-5.62158
				-4.17989	-7.02623
				11.6771	-7.98569
				28.5405	-8.88358
				45.7409	-9.89618
				61.6391	-10.8988
				75.1251	-11.5925
				85.6718	-11.6513
[truncated: 862 more rows]

## Sheet: Participant 08
MTP_moment	Plantar_Aponuerosis_Length	MTP_angle	Time	AbductorHallucis	FlexorDigitorumBrevis
NaN	NaN	-21.3614	0	55.0632	-11.413
NaN	NaN	-21.0414	0.0076	47.8593	-7.44106
NaN	NaN	-20.6102	0.0152	38.2029	-1.22939
NaN	NaN	-20.1076	0.0228	26.4541	5.44097
NaN	NaN	-19.565	0.0304	13.1709	10.5423
NaN	NaN	-19.0366	0.038	-0.610972	12.7249
NaN	NaN	-18.6188	0.0456	-13.1208	11.7933
NaN	NaN	-18.4076	0.0532	-22.3174	8.45281
NaN	NaN	-18.3624	0.0608	-27.2107	3.68328
NaN	NaN	-18.3503	0.0684	-29.1074	-1.61662
NaN	NaN	-18.1624	0.076	-31.4826	-6.44939
NaN	NaN	-17.6574	0.0836	-38.1608	-9.42687
NaN	NaN	-16.8507	0.0912	-51.1069	-9.05011
NaN	NaN	-15.8414	0.0988	-69.2256	-4.48554
NaN	NaN	-14.7554	0.1064	-88.605	3.80049
NaN	NaN	-13.6564	0.114	-104.106	14.0353
NaN	NaN	-12.5732	0.1216	-111.654	23.944
NaN	NaN	-11.541	0.1292	-110.047	31.777
NaN	NaN	-10.6448	0.1368	-101.199	36.5925
NaN	NaN	-9.93168	0.1444	-88.6299	37.8933
NaN	NaN	-9.43357	0.152	-75.3253	35.5628
NaN	NaN	-9.09989	0.1596	-62.4234	30.2295
NaN	NaN	-8.89139	0.1672	-49.6459	23.2795
NaN	NaN	-8.73369	0.1748	-37.0049	16.107
NaN	NaN	-8.59929	0.1824	-25.6708	9.30159
NaN	NaN	-8.48141	0.19	-16.9368	2.76117
NaN	NaN	-8.38863	0.1976	-10.9226	-3.50236
NaN	NaN	-8.31918	0.2052	-6.64012	-8.88599
NaN	NaN	-8.27655	0.2128	-2.99426	-12.3118
NaN	NaN	-8.24918	0.2204	0.547036	-12.6726
NaN	NaN	-8.23036	0.228	4.01267	-9.57713
NaN	NaN	-8.21419	0.2356	7.11098	-3.94098
NaN	NaN	-8.19589	0.2432	9.23679	2.3519
NaN	NaN	-8.16774	0.2508	9.80124	7.48367
NaN	NaN	-8.12401	0.2584	8.92589	10.5583
NaN	NaN	-8.07296	0.266	7.66989	11.8284
NaN	NaN	-8.03754	0.2736	7.49147	12.187
NaN	NaN	-8.04555	0.2812	9.57154	12.3287
NaN	NaN	-8.09936	0.2888	14.4339	12.3079
NaN	NaN	-8.15577	0.2964	21.7287	11.6735
NaN	NaN	-8.16106	0.304	30.0832	10.0694
NaN	NaN	-8.07244	0.3116	37.3881	7.97433
NaN	NaN	-7.8828	0.3192	41.7828	6.60571
NaN	NaN	-7.59516	0.3268	42.7031	6.73699
NaN	NaN	-7.25428	0.3344	40.9701	7.90935
NaN	NaN	-6.93852	0.342	37.9407	9.11326
NaN	NaN	-6.72931	0.3496	34.8621	9.80768
NaN	NaN	-6.73155	0.3572	32.9028	10.0591
NaN	NaN	-6.95061	0.3648	33.0231	10.1829
NaN	0.179098	-7.38138	0.3724	35.2721	10.3183
NaN	0.179024	-7.87436	0.38	38.3843	10.0606
NaN	0.178912	-8.29465	0.3876	40.449	8.64917
NaN	0.178783	-8.59708	0.3952	40.1395	5.65037
NaN	0.178649	-8.73147	0.4028	37.338	1.37758
NaN	0.178515	-8.70166	0.4104	32.8767	-3.36794
NaN	0.178385	-8.47158	0.418	28.1018	-7.81667
NaN	0.178257	-8.0867	0.4256	24.4866	-11.3853
NaN	0.178126	-7.58428	0.4332	22.9	-13.6364
NaN	0.177989	-7.06792	0.4408	22.8157	-14.4281
NaN	0.177857	-6.62568	0.4484	22.4742	-14.0483
NaN	0.177751	-6.30168	0.456	20.0313	-13.1271
NaN	0.177686	-6.10247	0.4636	14.4185	-12.3282
NaN	0.17766	-5.99451	0.4712	5.43139	-11.9203
NaN	0.177666	-5.94367	0.4788	-6.20559	-11.6673
NaN	0.177697	-5.92125	0.4864	-18.6208	-11.3463
NaN	0.177742	-5.91753	0.494	-29.1781	-11.2457
NaN	0.177803	-5.94424	0.5016	-35.7926	-11.8788
NaN	0.177874	-6.01244	0.5092	-38.1465	-13.4091
NaN	0.177948	-6.12213	0.5168	-37.4546	-15.5552
NaN	0.178016	-6.25758	0.5244	-34.9448	-17.7972
19.5372	0.178072	-6.41428	0.532	-30.7712	-19.5415
18.5708	0.178121	-6.60101	0.5396	-24.4955	-20.3023
17.6269	0.178176	-6.85502	0.5472	-16.2744	-19.8281
16.6595	0.178254	-7.20812	0.5548	-7.39144	-18.0431
15.6809	0.17838	-7.75672	0.5624	0.117358	-14.9995
14.625	0.178558	-8.54561	0.57	4.53897	-10.968
13.474	0.178796	-9.74676	0.5776	6.17275	-6.60933
12.2323	0.179058	-11.3567	0.5852	8.8696	-3.14678
10.8541	0.179306	-13.4075	0.5928	19.5934	-2.10957
9.49685	0.179498	-15.6196	0.6004	44.943	-4.48799
8.03274	0.179593	-17.7729	0.608	86.3302	-10.0167
6.49559	0.179598	-19.7784	0.6156	137.155	-17.1191
4.9474	0.17952	-21.6202	0.6232	184.522	-23.462
3.40074	0.179406	-23.3644	0.6308	215.205	-26.9727
1.91553	0.179298	-25.1028	0.6384	221.744	-26.7996
0.573647	0.179229	-26.9931	0.646	204.121	-23.6083
-0.700434	0.179219	-29.226	0.6536	167.299	-19.0951
-1.87118	0.179285	-31.9692	0.6612	118.262	-14.9493
-2.91869	0.179445	-35.3528	0.6688	64.2704	-11.9985
-3.76715	0.17971	-39.4194	0.6764	11.6069	-10.2157
-4.31088	0.180073	-44.0634	0.684	-35.798	-9.16345
-4.45488	0.180492	-48.9859	0.6916	-77.0256	-8.19317
-4.2576	0.180885	-53.6872	0.6992	-112.996	-6.55048
-3.85561	0.181126	-57.3937	0.7068	-144.258	-3.73307
-3.1796	0.181124	-59.5114	0.7144	-169.861	0.0770572
-2.25821	0.180767	-59.2181	0.722	-187.904	3.87027
-1.3657	0.180074	-56.5068	0.7296	-196.554	6.11912
-0.728518	0.179067	-51.2011	0.7372	-194.66	5.50899
-0.328817	0.177973	-44.3966	0.7448	-182.276	1.70383
-0.0310139	0.177114	-37.3299	0.7524	-161.248	-4.34612
0.197137	0.176636	-31.203	0.76	-135.312	-10.5938
				-109.12	-14.5356
				-86.5351	-14.2774
				-69.3079	-9.43648
				-56.9294	-1.22651
				-47.6785	8.25901
				-40.0475	17.0567
				-33.4022	24.0544
				-27.5437	29.179
				-21.9997	32.9927
				-16.0817	35.9004
				-9.69492	37.7547
				-3.607	38.1793
				1.3398	37.1382
				4.80567	35.2063
				6.79399	33.0934
				7.64831	30.8902
				8.1702	28.1496
				9.15631	24.708
				10.7653	21.1191
				12.4548	18.1341
				13.3606	15.8587
				12.7	13.6379
				10.1409	10.727
				6.07966	6.93941
				1.57065	2.75619
				-2.16565	-1.01532
				-4.35525	-3.66521
				-4.85978	-4.87145
				-3.74759	-4.82911
				-0.816078	-4.06751
				4.35764	-3.01596
				11.8869	-1.86667
				20.9626	-0.90611
				29.6768	-0.601006
				35.7076	-1.23809
				37.5482	-2.91324
				35.2064	-5.75747
				29.7744	-9.60438
				22.6058	-13.5759
				15.0717	-16.4284
				8.56102	-17.3456
				4.04873	-16.4759
				1.80596	-14.9176
				1.70857	-14.0296
				3.45967	-14.4937
				6.53991	-16.1061
				10.3038	-18.4016
				14.1962	-21.0905
				18.015	-23.9212
				22.022	-26.562
				26.485	-28.5488
				31.1408	-29.0847
				35.4321	-27.1647
				39.1621	-22.0325
				42.7255	-13.6629
				46.7	-3.34434
				51.1749	6.34197
				55.7234	12.6591
				60.2165	14.0147
				65.2661	10.8191
				71.6946	5.78564
				79.8198	2.67756
				89.1141	3.71858
				98.1335	8.14784
				104.679	13.0064
				106.273	14.8669
				100.867	11.5782
				87.663	3.47075
				67.9259	-6.64087
				45.2115	-14.5463
				24.2469	-16.4227
				8.75269	-10.7529
				-0.149037	0.821406
				-3.83537	14.4925
				-5.17784	26.3889
				-7.49319	34.1345
				-13.3466	37.1673
				-23.5611	36.4724
				-37.0896	33.919
				-51.6724	31.0553
				-64.8467	28.277
				-74.7319	25.2013
				-80.1755	21.7382
				-80.612	18.7034
				-76.2002	17.3587
				-68.0872	18.4596
				-58.1272	21.7472
				-48.1605	25.9482
				-39.8045	29.1017
				-34.7519	29.3387
				-34.5291	25.7517
				-39.6839	18.7478
				-49.3116	9.69821
				-61.244	0.124985
				-72.7391	-8.91234
				-81.3218	-16.7769
				-85.3862	-22.9478
				-84.5474	-26.9398
				-79.6741	-28.3768
				-72.5246	-27.23
				-65.1761	-24.1418
				-59.2488	-20.1377
				-55.1743	-15.909
				-52.2174	-11.7024
				-49.2041	-7.6227
				-45.1235	-3.76886
				-39.2827	-0.31442
				-31.3639	2.60822
				-21.5518	5.10724
				-10.5598	7.32874
				0.461582	9.04022
				10.0137	9.47057
				16.5635	7.53886
				19.2315	2.33222
				18.3407	-6.29228
				15.2746	-17.1765
				11.6473	-27.9651
				8.34889	-36.0691
				5.31599	-39.92
				2.21193	-39.6885
				-0.888486	-36.884
				-3.58175	-33.0978
				-5.61389	-29.1
				-6.97946	-25.1236
				-7.64984	-21.6216
				-7.58013	-19.2313
				-7.02184	-18.099
				-6.4024	-17.6063
				-5.70638	-16.7113
				-4.20079	-14.6027
				-0.903971	-11.2347
				4.82139	-7.33017
				13.1884	-4.0921
				24.1211	-2.78921
				37.1597	-3.95991
				51.4493	-6.82422
				66.0181	-9.82772
				79.7775	-11.7688
				91.0416	-12.271
				97.4678	-11.5243
				97.1378	-10.0264
				90.0253	-8.42147
				78.3729	-7.05086
				65.5904	-5.63627
				54.6164	-3.6523
				46.8672	-0.87274
				42.1852	2.48119
				39.419	5.85093
				37.2131	8.51584
				34.6756	9.89116
				31.5653	9.88325
				28.1095	8.98927
				24.7221	8.0459
				21.6319	7.87784
				18.653	8.93532
				15.4219	10.957
				11.7818	13.0563
				7.78026	14.2565
				3.68679	13.8902
				0.203442	11.8341
				-1.95821	8.86187
				-2.75625	6.51661
				-2.63925	6.15476
				-2.03413	8.04707
				-1.39789	11.2474
				-1.39365	14.1887
				-2.57359	15.6444
				-4.91241	15.3714
				-7.79801	13.9112
				-10.5274	11.8638
				-12.8286	9.5632
				-14.8767	7.36083
				-16.8914	5.69028
				-18.9002	4.71145
				-20.7895	4.21801
				-22.3602	3.95052
				-23.3801	3.88939
				-23.6614	4.27067
				-23.0546	5.2558
				-21.568	6.53922
				-19.6897	7.50338
				-18.2637	7.87798
				-17.736	8.01362
				-17.7041	8.36175
				-17.4245	8.91205
				-16.7487	9.32537
				-16.3267	9.35446
				-16.8672	8.93945
				-18.4916	8.18343
				-20.6282	7.43615
				-22.1855	7.15725
				-22.1965	7.47365
				-20.5913	8.03623
				-18.1448	8.40973
				-15.8735	8.44784
				-14.5716	8.27561
				-14.3182	7.96571
				-14.3717	7.33975
				-13.9612	6.30731
				-12.9646	5.36982
				-11.682	5.42214
				-10.4108	6.76686
				-9.42652	8.49662
				-8.95423	9.15899
				-8.88716	7.95066
				-8.80721	5.24514
				-8.41878	2.25665
				-7.77317	0.239163
				-7.02768	-0.181509
				-6.13658	0.877263
				-4.93373	2.78419
				-3.40506	4.60999
				-1.70438	5.41492
				-0.0171818	4.88818
				1.49507	3.7719
				2.6458	3.19988
				3.23121	3.7848
				3.24313	5.40553
				2.99655	7.12412
				2.8984	7.46608
				3.16239	5.49236
				3.81766	1.42705
				4.82913	-3.76445
				5.98372	-9.00281
				6.75521	-13.3911
				6.67909	-16.2214
				5.88121	-17.093
				4.93168	-16.3393
				4.19763	-15.0535
				3.45814	-14.3405
				2.21065	-14.6026
				0.353367	-15.4563
				-1.59488	-16.0644
				-2.88153	-15.7381
				-3.01778	-14.5762
				-2.102	-13.3186
				-0.754738	-12.4115
				0.354955	-11.5758
				1.00744	-10.3602
				1.51834	-8.79201
				2.27114	-7.33261
				3.22875	-6.29502
				4.08374	-5.60701
				4.70501	-5.23275
				5.16754	-5.40808
				5.5122	-6.16801
				5.70118	-6.9861
				5.70181	-7.23903
				5.46613	-6.8036
				4.85702	-6.01366
				3.71554	-5.27479
				2.05544	-4.8346
				0.126625	-4.76491
				-1.71109	-4.97566
				-3.10866	-5.26312
				-3.81139	-5.56388
				-3.81428	-6.02881
				-3.42384	-6.53341
				-2.88585	-6.46091
				-1.89731	-5.4708
				0.101466	-4.16363
				3.01309	-3.53805
				5.79918	-3.95574
				7.24875	-4.71995
				6.90602	-4.56465
				5.17042	-2.7208
				2.72055	0.439178
				0.110513	3.84012
				-2.25683	6.55961
				-3.96018	8.20272
				-4.41693	8.82636
				-3.17982	8.76993
				-0.486756	8.39018
				2.72603	7.79183
				5.54129	6.80809
				7.72107	5.24712
				9.56826	3.18295
				11.3784	0.865591
				13.2828	-1.62028
				15.2882	-4.19911
				17.0784	-6.43851
				17.999	-7.85792
				17.5044	-8.4895
				15.6374	-8.75386
				13.0228	-8.84142
				10.3872	-8.49038
				8.25043	-7.48578
				6.98746	-6.16723
				6.7675	-5.02606
				7.35602	-3.90584
				8.20604	-2.13181
				8.78502	0.739026
				8.76411	4.63881
				7.90108	9.10163
				5.78117	13.4497
				1.97389	17.0662
				-3.39527	19.5348
				-9.58484	20.5593
				-15.7452	19.938
				-21.2247	17.6367
				-25.5705	13.8073
				-28.3966	8.86094
				-29.342	3.64942
				-28.3125	-0.57361
				-25.6241	-2.70144
				-21.8271	-2.51128
				-17.4802	-0.821336
				-12.9738	1.16926
				-8.46701	2.65791
				-4.10643	3.40683
				-0.288084	3.47067
				2.48411	3.01518
				3.97505	2.27498
				4.34641	1.54163
				3.92623	1.15305
				2.86829	1.4118
				1.19012	2.40741
				-0.831713	3.79531
				-2.6261	4.90542
				-3.73031	5.35998
				-4.03732	5.47965
				-3.6523	5.90954
				-2.60608	6.98139
				-0.849913	8.50885
				1.52492	9.92878
				4.2741	10.4538
				7.06807	9.3959
				9.45086	6.67178
				10.9743	2.93984
				11.3717	-0.781392
				10.4277	-3.6208
				8.04833	-5.35894
				4.74607	-6.60638
				1.54132	-8.14165
				-0.923854	-10.0456
				-2.76197	-11.6317
				-4.23349	-12.0748
				-5.25552	-11.0753
				-5.62491	-9.01398
				-5.3637	-6.58217
				-4.80858	-4.39159
				-4.55638	-2.81384
				-5.18001	-1.93168
				-6.72898	-1.65372
				-8.59948	-2.02215
				-10.1242	-3.20041
				-11.1302	-4.89891
				-11.7248	-6.14392
				-11.8418	-6.0587
				-11.1915	-4.71839
				-9.42462	-2.92137
				-6.39509	-1.3525
				-2.40761	-0.266427
				1.956	0.365095
				6.16372	0.804524
				9.73977	1.49518
				12.2745	2.82736
				13.6648	4.85285
				14.2092	7.08541
				14.4412	8.68625
				15.0523	9.05477
				17.0955	8.1801
				22.129	6.47135
				31.6747	4.49062
				45.8763	2.86573
				62.3287	2.23739
				76.4391	2.96296
				83.52	4.73818
				80.998	6.63243
				69.1146	7.49053
				50.349	6.48387
				28.432	3.78684
				7.34148	0.736809
				-9.56649	-1.14153
				-20.4047	-1.40052
				-25.3724	-0.761658
				-26.3939	-0.175279
				-25.6106	-0.293648
				-23.936	-1.42624
				-21.2391	-3.15032
				-17.7494	-4.30119
				-14.5424	-3.87854
				-12.6743	-1.69206
				-12.5222	1.74949
				-13.7025	5.46891
				-15.0912	8.2393
				-15.5312	9.01531
				-15.0811	7.3407
				-14.7613	3.36931
				-14.1656	-2.34712
				-9.66488	-9.10941
				4.20344	-16.2706
				30.8099	-23.2152
				67.7198	-29.3541
				105.846	-34.1435
				132.509	-37.0121
				136.811	-37.6397
				113.82	-36.1234
				65.2774	-32.4597
				-2.47707	-26.4733
				-81.0219	-18.4927
				-160.676	-9.57221
				-230.188	-0.994158
				-278.218	6.38944
				-297.154	12.3538
				-286.186	16.7803
				-250.875	19.2128
				-199.89	19.3184
				-141.874	17.7915
				-84.0072	16.2887
				-31.2714	15.9719
				14.1419	16.3338
				52.1315	15.8818
				82.5682	13.8685
				103.656	11.0207
				112.286	8.60564
				105.96	7.21035
				84.8158	6.62081
				52.5392	6.4397
				15.6294	6.49491
				-18.4727	6.91552
				-43.238	7.90739
				-54.3866	9.2943
				-50.6519	10.4387
				-33.8144	10.7981
				-8.15798	10.3849
				20.8014	9.47982
				48.3149	8.04919
				71.4416	5.79172
				87.8151	2.87561
				93.7196	0.34762
				83.9062	-0.476106
				53.8699	1.09984
				3.53149	4.78213
				-60.1738	9.35964
				-124.271	13.1993
				-174.153	15.0631
				-198.937	14.6496
				-195.119	12.5022
				-166.722	9.52729
				-121.978	6.55479
				-68.7975	4.05183
				-12.1976	1.94887
				45.0899	-0.26312
				100.673	-3.10071
				151.309	-6.67167
				193.041	-10.5741
				222.956	-14.1306
				241.925	-17.0054
				255.652	-19.7101
				271.755	-23.105
				294.481	-27.2665
				322.053	-31.1838
				348.836	-33.592
				369.026	-33.8104
				378.786	-31.9643
				376.682	-28.808
				362.941	-25.2564
				339.55	-21.8931
				312.023	-18.8903
				288.642	-16.2868
				275.216	-14.3038
				269.708	-13.3539
				260.43	-13.5175
				228.558	-13.8478
				154.783	-12.2921
				27.607	-6.64009
				-150.124	4.11637
				-358.323	18.9415
				-562.929	34.9051
				-726.799	48.4598
				-823.85	57.0654
				-848.276	59.9639
				-813.384	58.0479
				-742.048	53.2523
				-656.621	47.4807
				-573.547	41.7181
				-501.399	36.2165
				-440.258	31.1379
				-383.98	26.6751
				-325.434	22.7858
				-261.013	19.0087
				-191.72	14.7144
				-121.534	9.67654
				-55.1236	4.21871
				3.94331	-1.16253
				54.6251	-6.10781
				99.1791	-10.5005
				142.183	-14.4661
				187.821	-18.3367
				237.017	-22.5909
				286.067	-27.4909
				327.739	-32.6315
				354.541	-37.0482
				362.329	-39.7749
				352.18	-40.3061
				329.4	-38.7481
				300.231	-35.6497
				268.589	-31.6046
				235.037	-26.8355
				198.205	-21.1874
				157.099	-14.6515
				112.471	-7.8219
				67.0253	-1.73723
				25.1725	2.77762
				-7.86214	5.69317
				-27.6956	7.66317
				-32.4443	9.17907
				-23.9587	10.031
				-8.01368	9.86012
				7.82018	8.91384
				18.0764	7.92101
				21.9427	7.36075
				22.4522	7.054
				23.6424	6.38048
				28.0746	4.8133
				35.8317	2.4136
				44.9987	-0.200008
				53.2013	-2.36855
				59.151	-3.76966
				63.2657	-4.59915
				67.3974	-5.5885
				73.7593	-7.46301
				83.3585	-10.0889
				95.0447	-12.3711
				105.613	-13.2206
				110.346	-12.3636
				103.979	-10.1557
				82.6678	-7.08958
				46.6041	-3.57825
				1.91544	-0.00734884
				-40.2456	3.05126
				-68.2599	4.90404
				-75.688	5.15844
				-63.983	3.94055
				-40.789	1.78673
				-15.8689	-0.423276
				2.25052	-1.55484
				7.7601	-0.714838
				-1.81249	2.04205
				-24.8163	5.53855
				-55.0674	8.13777
				-83.205	8.78596
				-100.034	7.6612
				-100.11	5.92663
				-83.4199	4.76501
				-54.3747	4.46332
				-18.885	4.33887
				18.4919	3.47333
				55.4141	1.38719
				91.0736	-1.83638
				125.39	-5.68221
				157.73	-9.34194
				184.875	-11.9344
				200.459	-12.8044
				197.862	-11.8083
				174.911	-9.4596
				136.51	-6.70059
				93.3502	-4.3897
				57.4643	-2.95658
				36.2837	-2.37803
				27.4409	-2.20638
				16.9904	-1.49884
				-16.0709	1.06525
				-88.0592	6.64733
				-197.822	15.4097
				-323.327	25.7324
				-431.369	34.4624
				-493.765	38.7506
				-499.038	37.8661
				-453.652	33.0665
				-375.987	26.249
				-288.726	19.1439
				-211.784	13.1396
				-156.602	9.13961
				-123.871	7.38039
				-106.047	7.28011
				-92.8852	7.51013
				-76.5218	6.55895
				-54.1194	3.6115
				-27.7595	-1.01305
				-2.18181	-6.22671
				17.8642	-10.7145
				29.1948	-13.2945
				30.8261	-13.3561
				24.1661	-11.1441
				12.3571	-7.52787
				-1.54529	-3.49408
				-15.9779	0.268147
				-30.279	3.47538
				-43.1365	6.02223
				-51.7804	7.83121
				-52.5147	9.00384
				-42.5056	9.65509
				-21.4755	9.37815
				8.23875	7.3893
				42.8091	3.46766
				77.8341	-1.48664
				108.864	-5.95803
				132.255	-8.79872
				146.15	-9.66002
				150.804	-8.7687
				148.324	-6.72472
				141.91	-4.34183
				134.648	-2.23575
				128.494	-0.693715
				124.07	-0.0922384
				121.234	-0.956436
				119.715	-3.41005
				119.164	-6.99015
				118.806	-10.9938
				117.16	-14.6538
				112.056	-17.0648
				101.316	-17.3268
				84.2136	-15.0984
				62.725	-11.0321
				41.3472	-6.45282
				25.2331	-2.60021
				17.6955	-0.172688
				18.8497	0.704544
				26.1522	0.317598
				36.0831	-0.763612
				45.6951	-1.81179
				53.2386	-2.45332
				57.9973	-3.1588
				59.9724	-4.70533
				59.6501	-7.1453
				57.5854	-9.70937
				54.0101	-11.4702
				48.9262	-11.8059
				42.445	-10.5939
				35.0905	-8.23117
				27.8543	-5.34493
				21.7145	-2.4232
				17.128	0.269507
				14.0885	2.53445
				12.3973	4.1017
				11.6269	4.70432
				10.9995	4.41461
				9.72588	3.80946
				7.57892	3.50448
				4.98784	3.5389
				2.64012	3.42125
				1.02727	2.80257
				0.0725452	1.9267
				-0.956833	1.33339
				-2.97339	1.31665
				-6.37126	1.64946
				-10.8584	1.62131
				-15.9494	0.528473
				-21.4423	-1.67147
				-27.4276	-4.30799
				-33.963	-6.59992
				-40.7671	-8.20982
				-47.2771	-9.28959
				-52.9113	-10.0864
				-57.2766	-10.5433
				-60.4009	-10.3885
				-62.6108	-9.53987
				-63.7378	-8.13986
				-62.33	-6.28592
				-55.537	-4.11284
				-40.1351	-2.06202
				-15.1476	-0.743023
				15.5847	-0.520426
				44.0965	-1.2247
				62.3743	-2.12559
				66.4913	-2.37507
				58.1526	-1.73374
				43.2142	-0.757895
				28.2613	-0.211352
				17.3208	-0.33409
				10.5568	-0.564347
				5.14157	0.0742115
				-2.86275	2.21007
				-16.5158	5.55975
				-36.1654	8.98676
				-58.4445	11.2436
				-77.1816	11.8116
				-86.182	11.0802
				-82.2079	9.84
				-66.4171	8.6741
				-43.8681	7.80069
				-21.7673	7.35152
				-7.0865	7.44286
				-4.15899	7.93047
				-13.4053	8.58415
				-31.936	9.48258
				-55.1659	10.7058
				-78.2969	11.9587
				-97.6039	13.0655
				-111.011	14.2222
				-117.386	15.2133
				-115.957	15.1102
				-107.055	13.324
				-92.9493	10.5274
				-77.2879	8.08502
				-63.5827	6.8813
				-53.9752	7.10461
				-48.8278	8.64009
				-47.0803	11.0741
				-46.8736	13.6214
				-45.9505	15.3769
				-42.1509	15.6551
				-34.1867	14.2186
				-21.9644	11.3739
				-6.21732	7.87894
				11.6331	4.5233
				29.2285	1.69765
				43.6917	-0.426301
				52.975	-1.48927
				56.9841	-1.31946
				57.3099	-0.597077
				55.783	-0.496588
				53.3159	-1.72824
				50.028	-4.2242
				46.0435	-7.46766
				41.7895	-10.7843
				37.5463	-13.4967
				32.7633	-15.2863
				26.011	-16.4067
				16.2093	-17.1613
				4.22306	-17.3701
				-7.09539	-16.6987
				-14.7606	-15.2182
				-17.5734	-13.3695
				-16.405	-11.5717
				-12.9858	-9.97766
				-8.5944	-8.56784
				-3.63779	-7.38832
				1.96253	-6.52192
				8.12221	-5.90059
				14.2448	-5.29657
				19.2742	-4.51826
				22.019	-3.63962
				21.8981	-2.81959
				19.556	-1.86971
				16.4771	-0.527765
				14.0889	0.743983
				13.3157	0.850496
				14.4826	-0.748303
				17.169	-3.24841
				20.2174	-5.03668
				22.2252	-4.90333
				22.3941	-2.9568
				21.0897	-0.605903
				19.6653	0.523624
				20.0216	-0.189198
				24.3754	-2.14639
				34.6436	-4.23158
				51.0292	-5.61286
				71.0162	-6.10622
				90.1824	-6.01126
				104.287	-5.76038
				110.815	-5.59027
				109.307	-5.29666
				101.126	-4.41119
				88.742	-2.72333
				74.5051	-0.566481
				59.7961	1.31818
				45.3847	2.21635
				32.3221	1.84925
				22.1317	0.409373
				16.1414	-1.54199
				14.7984	-3.23527
				17.5471	-4.08234
				23.3893	-3.92419
				31.8945	-3.03392
				43.8048	-2.08713
				60.5092	-1.91734
				82.5037	-3.09717
				107.627	-5.62197
				130.707	-8.76192
				145.861	-11.2422
				149.855	-11.9049
				143.354	-10.4416
				129.073	-7.5393
				108.423	-4.31127
				79.1601	-1.44874
				36.7074	1.19776
				-20.2417	4.21932
				-84.1776	7.76216
				-139.721	10.9702
				-172.377	12.6172
				-178.806	12.4645
				-169.524	11.5842
				-160.997	11.3137
				-164.09	12.2506
				-178.431	13.9397
				-195.098	15.0289
				-202.634	13.9889
				-192.06	10.1026
				-160.392	3.94234
				-112.061	-2.87748
				-56.7271	-8.46908
				-4.44645	-11.5524
				38.2589	-11.835
				69.3355	-9.96145
				89.7916	-7.29007
				101.15	-5.13989
				103.31	-3.89601
				95.2686	-3.0011
				78.7165	-1.74847
				60.5804	0.01353
				50.7252	1.79318
				55.4184	2.81734
				71.7558	2.54616
				87.341	1.3362
				84.7834	0.738709
				49.1735	2.65561
				-24.1073	7.81154
				-126.373	15.0534
				-239.682	22.3011
				-344.266	28.141
				-425.079	32.3487
				-475.404	35.1632
				-496.174	36.6206
				-491.682	36.6948
				-465.045	35.5766
				-416.233	33.2977
				-343.487	29.2334
				-247.461	22.607
				-135.469	13.6617
				-21.9532	4.04008
				75.9648	-4.06732
				144.752	-9.13601
				178.566	-10.915
				179.938	-10.1193
				158.227	-7.70013
				126.532	-4.49251
				97.2749	-1.34957
				78.2803	0.817128
				71.6226	1.32411
				75.2274	-0.0290092
				85.5685	-3.05289
				100.072	-7.30084
				118.212	-11.8774
				140.817	-15.5357
				168.51	-17.6111
				200.897	-18.7759
				236.594	-20.3673
				272.887	-22.9908
				304.812	-26.0959
				324.907	-28.653
				324.48	-29.6733
				296.422	-28.2
				238.858	-23.5274
				157.862	-15.8453
				67.5647	-6.63034
				-13.2903	1.73419
				-68.1747	7.00089
				-89.6826	8.15776
				-81.5104	5.84278
				-54.4107	1.88399
				-20.1612	-1.62916
				12.3727	-3.29932
				38.4976	-2.89668
				57.156	-1.13566
				69.1066	0.76404
				75.1543	1.57059
				75.6643	0.830088
				71.0175	-0.768399
				62.3657	-2.22261
				52.1265	-3.29482
				43.2676	-4.44721
				36.9966	-5.94623
				30.5203	-7.35707
				17.6214	-7.74361
				-7.4838	-6.31896
				-45.7048	-3.21894
				-91.3215	0.359547
				-133.99	3.0531
				-163.003	4.36508
				-171.485	4.68993
				-158.715	4.53151
				-129.633	4.00595
				-91.9834	3.02098
				-52.8001	1.57103
				-16.3056	-0.304858
				15.7325	-2.52127
				42.2778	-4.67913
				61.9488	-6.18658
				73.4241	-6.81227
				76.4257	-6.79706
				71.946	-6.39681
				61.8248	-5.56849
				48.585	-4.14287
				35.1434	-2.21004
				23.7837	-0.331345
				15.3615	0.619338
				9.7549	-0.0745021
				6.89473	-2.53459
				7.28405	-6.2009
				11.6304	-10.0361
				19.896	-12.8862
				30.6414	-13.909
				41.1053	-12.8762
				47.6517	-10.2609
				46.5972	-7.03147
				35.782	-4.13563
				16.1631	-2.02777
				-8.13576	-0.589464
				-31.715	0.602325
				-50.4282	1.92165
				-63.018	3.48302
				-71.1189	5.18068
				-77.7124	6.88203
				-84.9617	8.58266
				-92.8808	10.3801
				-99.7433	12.255
				-103.793	13.9637
				-104.835	15.2907
				-104.486	16.3354
				-104.907	17.33
				-106.747	18.1403
				-107.706	18.1924
				-102.943	16.908
				-87.087	14.042
				-56.54	9.8119
				-11.302	4.92955
				43.6113	0.273846
				98.2137	-3.67585
				140.934	-6.93487
				164.152	-9.58075
				167.518	-11.5664
				156.551	-12.9498
				138.307	-13.8535
				118.206	-13.9983
				100.282	-12.7054
				88.7345	-9.71492
				86.7098	-5.74403
				92.0607	-1.95915
				94.7279	1.07206
				79.9757	3.97691
				36.6014	8.08113
				-35.1283	13.9446
				-121.432	20.353
				-200.876	25.0407
				-254.519	26.4002
				-273.717	24.3911
				-261.442	20.0927
				-227.786	14.8484
				-183.657	9.78151
				-136.607	5.56542
				-90.4198	2.35242
				-47.2058	0.0452565
				-9.26695	-1.36228
				20.6655	-1.80059
				40.2282	-1.3376
				48.374	-0.268184
				45.8209	0.96274
				34.8299	1.9333
				18.9429	2.42173
				2.88733	2.37361
				-8.33352	1.64175
				-11.5082	-0.0687236
				-6.86698	-2.86469
				2.17238	-6.24155
				10.6196	-9.00915
				13.5659	-9.90185
				7.46149	-8.43632
				-8.66712	-5.19781
				-31.9656	-1.43699
				-55.451	1.60691
				-70.1562	3.17558
				-69.6173	3.08824
				-53.77	1.69966
				-28.9697	-0.173499
				-4.23875	-1.52777
				13.3506	-1.7968
				21.4903	-1.42542
				22.5652	-1.56565
				21.3042	-3.00485
				21.7712	-5.54248
				25.4391	-8.27059
				31.2962	-10.1294
				37.1717	-10.3899
				40.6256	-8.95616
				39.2658	-6.30049
				31.4402	-3.07934
				17.1455	0.233135
				-1.43386	3.27819
				-20.0527	5.58655
				-33.7187	6.78624
				-38.6662	6.94283
				-33.4622	6.47159
				-18.9623	5.68583
				2.13028	4.3267
				25.8261	1.6196
				47.3585	-2.80473
				61.4333	-7.93427
				62.9628	-11.6438
				49.2708	-12.2017
				22.8647	-9.46147
				-8.14991	-4.61118
				-33.6417	0.763061
				-46.559	5.21162
				-45.486	7.76549
				-33.5482	8.33571
				-15.7351	7.64181
				3.38762	6.63128
				21.0575	5.86157
				36.8605	5.11418
				52.4548	3.59921
				70.1759	0.726638
				90.7	-3.25311
				111.514	-7.26151
				127.951	-10.1102
				136.082	-11.2806
				135.035	-10.9816
				127.128	-9.77126
				116.149	-8.30204
				105.385	-7.05585
				96.728	-6.11437
				90.976	-5.40442
				88.6602	-5.10887
				90.6081	-5.50458
				97.5484	-6.54973
				108.858	-7.92417
				121.303	-9.23711
				128.519	-9.93044
				122.202	-9.21177
				95.6354	-6.48121
				47.971	-2.02453
				-13.5981	2.74135
				-75.6445	5.88248
				-124.039	6.03113
				-150.022	3.1342
				-152.762	-1.53479
				-137.735	-5.96246
				-113.196	-8.38149
				-86.8347	-8.20034
				-63.8518	-6.14397
				-46.8154	-3.56186
				-36.4829	-1.47408
				-32.5182	0.022991
				-33.6532	1.53431
				-37.6505	3.6169
				-41.7664	6.28633
				-43.7888	9.18619
				-43.0301	11.8632
				-40.4317	13.5401
				-37.5206	13.3003
				-35.2409	11.177
				-33.5813	8.4209
				-31.6754	6.21356
				-28.1074	4.70988
				-21.5433	3.4878
				-11.4844	2.30335
				1.16989	1.21821
				14.1582	0.389546
				24.9394	-0.0304231
				32.27	-0.0619748
				36.5405	-0.130895
				38.2014	-0.780839
				36.2321	-2.16522
				28.6365	-4.09713
				14.232	-6.27202
				-6.15685	-8.19323
				-29.8622	-9.12437
				-53.3685	-8.35428
				-73.2188	-5.74132
				-86.7659	-2.01902
				-93.0703	1.62861
				-93.1499	4.20526
				-88.9692	5.18054
				-82.2222	4.57299
				-73.9082	2.95942
				-64.3879	1.25896
				-53.7347	0.210093
				-42.4745	0.01164
				-31.835	0.5528
				-22.8452	1.61279
				-15.2003	2.74329
				-7.14744	3.54343
				3.35403	4.18239
				16.8237	5.21432
				31.1223	6.78764
				42.4213	8.34385
				47.7558	9.16426
				46.6019	8.93599
				40.3388	7.81121
				31.0517	6.25621
				20.8508	4.89159
				11.4315	4.35586
				3.80317	5.06071
				-1.45452	6.66846
				-3.80177	7.94871
				-2.96424	7.60799
				0.501614	5.35319
				5.27435	2.1461
				10.0279	-0.576794
				13.9475	-1.99304
				16.6682	-2.20161
				18.1904	-1.7217
				18.8548	-1.08524
				19.1274	-0.647303
				19.4178	-0.390152
				20.0325	-0.251535
				21.0431	-0.699507
				22.1115	-2.32772
				22.5969	-4.95157
				21.9857	-7.64532
				20.1534	-9.50298
				17.2124	-10.1321
				13.3227	-9.59926
				8.76814	-8.17726
				4.12312	-6.26683
				0.234205	-4.36597
				-1.95094	-2.94671
				-1.69942	-2.34423
				1.00497	-2.71674
				5.16408	-4.01642
				9.05315	-5.72834
				10.982	-6.71867
				10.1251	-5.92267
				6.82403	-3.21527
				2.1009	0.58867
				-2.98095	4.2639
				-7.48078	6.6423
				-10.5917	7.05987
				-11.8567	5.68989
				-11.3179	3.32867
				-9.50059	0.869481
				-7.24608	-0.930595
				-5.2209	-1.68574
				-3.60259	-1.71169
				-2.4689	-1.77647
				-2.12247	-2.34122
				-2.74478	-3.06421
				-4.01003	-3.10521
				-5.12606	-2.07494
				-5.30288	-0.60003
				-4.47839	0.226301
				-3.46029	-0.188226
				-3.1009	-1.4804
				-3.52393	-2.55866
				-4.1662	-2.46105
				-4.24076	-1.17258
				-3.17969	0.62011
				-1.09656	2.46578
				1.00381	4.40534
				1.89079	6.33844
				1.17416	7.66505
				-0.494167	7.73284
				-2.19813	6.39985
				-3.5255	4.17211
				-4.57538	1.92744
				-5.45732	0.397696
				-6.08624	-0.283549
				-6.34896	-0.701527
				-6.13646	-1.84243
				-5.23754	-4.31886
				-3.40654	-7.62133
				-0.570353	-10.252
				3.06952	-10.7563
				7.13122	-8.78149
				11.3022	-5.25103
				15.614	-1.47533
				20.4417	1.61506
				26.0051	3.39535
				31.7454	3.54968
				36.3465	2.41865
				38.5604	0.849927
				38.0458	-0.472526
				35.3713	-1.40885
				31.3794	-2.07576
				26.7621	-2.26859
				22.0308	-1.41668
				17.6217	0.650066
				14.0177	3.248
				11.398	5.51361
				8.72601	7.16705
				3.53303	8.3826
				-7.02997	9.30562
				-24.8637	9.8783
				-49.8741	9.94511
				-79.4117	9.53635
				-108.728	9.11612
				-132.428	9.36439
				-146.294	10.5069
				-148.479	11.9253
				-139.242	12.5824
				-119.924	11.787
				-92.5544	9.57451
				-60.15	6.52395
				-26.5636	3.18654
				4.58347	-0.297042
				31.0789	-3.87814
				52.3703	-7.09794
				69.0414	-9.27259
				82.3688	-10.1698
				94.1867	-10.1932
				106.608	-9.85849
				121.249	-9.39471
				138.299	-8.86529
				155.595	-8.39463
				167.506	-8.15631
				165.399	-8.13494
				141.919	-8.02067
				96.8526	-7.42418
				39.4548	-6.25363
				-14.8052	-5.02295
				-51.1949	-4.58165
				-62.08	-5.36751
				-48.5204	-7.14612
				-17.1375	-9.41739
				24.0689	-11.8934
				68.0721	-14.6032
				108.78	-17.392
				139.901	-19.3469
				154.904	-19.0842
				148.936	-15.7447
				121.152	-9.77506
				75.439	-2.91038
				19.4483	2.74022
				-37.2071	5.94384
				-85.4691	6.98195
				-118.832	7.10551
				-132.758	7.13275
				-123.409	6.59333
				-89.9189	4.5233
				-39.2598	0.904144
				12.428	-3.05416
				45.4654	-5.77568
				45.6904	-6.20995
				10.7236	-4.27024
				-49.6047	-0.746319
				-117.98	3.08854
				-177.015	5.96546
				-215.823	7.35762
				-232.354	7.88635
				-230.619	8.57958
				-215.408	9.81438
				-188.953	11.2984
				-152.071	12.7279
				-107.736	13.9668
				-62.5167	14.7575
				-23.9911	14.6886
				3.08718	13.6232
				18.3087	12.0806
				24.8288	10.8813
				28.0479	10.2777
				34.0631	9.64292
				47.2813	8.12362
				67.554	5.54227
				88.865	2.59887
				101.495	0.282733
				96.9575	-0.692443
				72.8722	-0.0486487
				34.8851	1.98531
				-5.85579	4.60843
				-38.2875	6.63002
				-56.0996	7.04709
				-58.615	5.67157
				-48.6715	3.18203
				-30.0504	0.504262
				-5.9941	-1.86181
				20.8579	-3.88274
				47.4662	-5.49662
				69.5499	-6.33035
				82.2149	-5.93733
				81.8898	-4.20552
				67.9076	-1.50224
				42.796	1.59544
				12.0958	4.54514
				-16.2839	6.73547
				-34.6361	7.55837
				-39.4719	6.8475
				-33.6536	5.06481
				-24.2053	2.95437
				-17.5305	1.03901
				-16.3328	-0.561159
				-20.0317	-1.92261
				-26.3001	-3.08837
				-31.293	-4.02271
				-29.4381	-4.67797
				-15.1191	-5.22891
				13.7108	-6.26418
				52.4717	-8.33199
				89.7995	-11.1394
				111.335	-13.4764
				106.476	-13.9558
				74.5024	-11.8277
				25.8239	-7.38724
				-23.2311	-1.8666
				-58.4158	3.00817
				-72.6576	5.60463
				-66.4211	5.09116
				-45.1154	1.9663
				-15.7091	-2.19436
				15.7073	-5.76351
				44.9307	-7.98414
				69.731	-9.11917
				89.2158	-9.85875
				102.97	-10.4745
				110.817	-10.63
				113.143	-10.1734
				111.016	-9.68582
				105.695	-9.88182
				97.9487	-10.8007
				87.9899	-11.7957
				75.8545	-12.0345
				61.3008	-10.8948
				43.5157	-8.22066
				21.5357	-4.40656
				-5.17447	-0.116529
				-36.6025	4.10808
				-71.7083	8.0459
				-107.056	11.6516
				-135.691	14.5147
				-148.329	15.6194
				-137.48	14.0593
				-102.44	9.98579
				-52.2248	4.73782
				-3.55301	0.19152
				27.0924	-2.09595
				32.6624	-1.63536
				18.4356	0.838405
				-3.57943	3.97779
				-23.4163	6.47811
				-37.979	7.52248
				-49.1359	7.17706
				-58.569	6.25451
				-65.1193	5.56973
				-66.3783	5.31286
				-61.5648	5.04129
				-52.3774	4.23577
				-41.3838	2.83927
				-30.1383	1.27859
				-19.0152	0.161219
				-8.12233	-0.102495
				2.48009	0.33974
				13.3369	0.836356
				25.7717	0.777951
				41.3254	-0.00107672
				61.1111	-1.3707
				85.3915	-3.17701
				112.941	-5.12428
				140.474	-6.69945
				163.28	-7.63885
				177.083	-8.2416
				179.58	-8.95222
				170.721	-9.85917
				152.271	-10.6414
				127.396	-10.7646
				100.445	-9.82293
				76.8125	-7.91859
				61.9178	-5.71198
				58.7792	-4.06556
				65.9027	-3.5318
				77.2242	-3.96058
				83.6488	-4.50762
				75.7415	-4.07603
				47.9684	-1.8885
				2.80904	1.99075
				-48.8335	6.41736
				-92.2016	9.79011
				-115.415	11.1943
				-114.253	10.6296
				-93.0594	8.3784
				-62.1503	4.94448
				-32.9242	1.29169
				-13.2574	-1.71341
				-6.30225	-3.94933
				-12.2467	-5.65833
				-29.5421	-6.63909
				-54.2343	-6.23411
				-79.4671	-4.07236
				-97.6213	-0.676654
				-105.003	2.72445
				-105.909	5.25689
				-112.116	7.32994
				-136.604	10.1431
				-184.77	14.2542
				-249.098	18.9718
				-311.45	23.0473
				-351.516	25.6046
				-355.494	26.3451
				-320.679	25.1553
				-255.238	21.9482
				-173.643	16.8429
				-90.4791	10.2288
				-17.3703	2.80535
				36.588	-4.34685
				64.6667	-9.81688
				64.6335	-12.1151
				42.1729	-10.4554
				12.0938	-5.74071
				-6.99523	-0.527571
				-3.873	2.40414
				16.4905	1.94808
				35.1651	-0.349364
				31.945	-1.42334
				-0.908548	0.740471
				-52.9559	5.62553
				-101.018	10.8648
				-122.436	13.8791
				-107.627	13.3404
				-63.8974	9.90214
				-9.46774	5.62874
				36.875	2.5008
				63.7098	1.41604
				69.1289	2.20891
				58.5809	3.97666
				41.2601	5.44718
				26.3352	5.64387
				19.8481	4.3767
				23.5889	2.02777
				36.2949	-0.903486
				55.7529	-4.03624
				79.9732	-7.12251
				106.858	-9.84518
				133.434	-11.8014
				156.032	-12.8353
				171.439	-13.0964
				178.1	-12.7569
				176.747	-12.004
				170.246	-11.2397
				162.442	-10.965
				156.491	-11.4804
				153.912	-12.7818
				154.689	-14.578
				157.527	-16.3114
				159.786	-17.3788
				157.877	-17.5627
				148.809	-17.1539
				132.173	-16.5884
				110.993	-16.1191
				90.6994	-15.8172
				76.9389	-15.7606
				73.6268	-16.1187
				82.004	-16.9745
				100.594	-18.2154
				125.72	-19.651
				152.427	-20.9917
				175.348	-21.7331
				189.409	-21.3482
				191.059	-19.6412
				179.493	-16.8741
				156.395	-13.4875
				124.564	-9.57392
				86.9347	-4.89302
				46.2621	0.297827
				5.09219	4.95184
				-34.2628	8.36521
				-70.2017	11.1403
				-102.884	14.4404
				-134.995	18.689
				-170.856	23.3393
				-213.501	27.5149
				-261.403	30.6286
				-307.304	32.4852
				-340.362	32.8635
				-350.492	31.2053
				-332.459	26.9731
				-288.02	20.3149
				-225.715	12.245
				-158.694	4.25244
				-101.608	-2.09334
				-67.467	-5.37938
				-63.572	-4.84219
				-87.0244	-1.02901
				-124.168	4.29436
				-156.161	9.17519
				-167.264	12.3265
				-151.155	13.2936
				-112.204	12.3459
				-61.432	10.111
				-10.5774	7.09508
				31.3855	3.74612
				57.8684	0.965082
				63.2859	0.0458934
				44.4412	1.80534
				4.33022	5.96445
				-45.937	11.2373
				-90.1433	15.6825
				-113.536	17.4318
				-108.675	15.7936
				-77.2524	11.5274
				-28.021	5.86429
				26.8674	-0.204557
				75.3499	-5.7671
				108.805	-10.0695
				125.311	-12.9662
				130.686	-14.8137
				135.401	-15.9405
				149.031	-16.6339
				175.435	-17.3856
				210.149	-18.4781
				240.772	-19.4348
				251.742	-19.2652
				232.461	-17.1244
				183.499	-12.858
				116.031	-7.28572
				45.1873	-1.65906
				-17.1545	3.36259
				-65.1177	7.83751
				-97.0553	11.7969
				-113.016	14.8117
				-114.09	16.3034
				-103.025	16.1192
				-84.1766	14.7574
				-62.2793	13.0237
				-41.0872	11.3725
				-22.7335	9.64558
				-7.91477	7.55035
				3.35406	5.16838
				10.9644	2.86006
				14.5585	0.935359
				13.9723	-0.388663
				9.78878	-0.944589
				3.58977	-0.820536
				-2.58659	-0.503779
				-7.32198	-0.557408
				-10.1932	-1.22679
				-11.1564	-2.44832
				-9.96234	-4.01578
				-6.2948	-5.7069
				-0.431931	-7.40975
				6.31345	-9.14192
				12.1035	-10.9759
				15.6302	-12.9109
				16.651	-14.6513
				15.8628	-15.5844
				14.5833	-15.233
				14.241	-13.7454
				15.468	-11.8544
				17.5536	-10.3858
				19.1873	-9.76318
				19.5589	-9.89483
				18.5318	-10.5084
				16.2636	-11.46
				12.9396	-12.5663
				8.67169	-13.3973
				3.5137	-13.569
				-2.46033	-13.0088
				-9.0734	-11.821
				-15.9975	-10.1319
				-22.7837	-7.81482
				-28.9856	-4.39433
				-34.2689	0.276462
				-38.2822	5.53263
				-40.3332	10.3076
				-39.4002	13.624
				-34.9464	14.8271
				-28.0093	13.7954
				-21.1055	11.1066
				-16.4836	7.85895
				-14.3241	5.02896
				-12.8446	3.09766
				-10.5369	2.21619
				-8.10971	2.16368
				-7.38087	2.31398
				-8.17688	2.1354
				-6.96567	1.56493
				1.22838	0.80975
				19.3935	0.0325704
				45.8849	-0.637273
				73.4926	-0.861513
				90.9952	-0.1687
				87.9083	1.61262
				60.2633	4.33845
				13.1313	7.86326
				-41.8418	11.8655
				-91.6823	15.6062
				-126.729	18.2576
				-142.585	19.3099
				-139.406	18.6791
				-120.115	16.6806
				-88.6863	13.8353
				-48.5389	10.5438
				-1.73494	7.04645
				50.004	3.64385
				103.503	0.730061
				153.59	-1.33278
				194.163	-2.30834
				220.073	-2.21167
				229.12	-1.35199
				223.294	-0.280939
				208.747	0.130796
				194.33	-1.14293
				187.548	-4.57651
				188.484	-9.54227
				186.238	-14.4519
				161.729	-17.2702
				96.0375	-16.1744
				-19.3797	-10.3993
				-175.79	-0.704438
				-348.174	11.1171
				-503.539	23.0761
				-611.543	33.3726
				-653.138	40.4607
				-624.897	43.1955
				-537.882	41.1539
				-412.131	34.8734
				-269.639	25.5846
				-128.336	14.5952
				1.44546	2.97064
				116.985	-8.41777
				219.627	-18.8476
				309.417	-27.6707
				381.508	-34.2381
				427.409	-38.0879
				440.775	-39.3123
				423.3	-38.7158
				384.71	-37.2677
				335.945	-35.1826
				282.323	-31.987
				223.147	-27.4985
				156.337	-22.0997
				82.6377	-16.1847
				6.50598	-9.94067
				-65.8531	-3.61224
				-128.699	2.33216
				-177.066	7.35184
				-206.678	11.153
				-215.681	13.8315
				-206.67	15.7026
				-186.423	17.0937
				-163.248	18.1162
				-143.57	18.3701
				-130.011	17.2501
				-122.543	14.8318
				-121.441	12.1081
				-128.2	10.3428
				-142.872	10.248
				-160.996	11.4086
				-174.041	12.6468
				-173.621	13.1753
				-156.104	12.9212
				-123.981	11.7734
				-83.5539	9.28379
				-41.1725	5.219
				-0.619725	0.00412427
				36.9043	-5.34743
				71.1778	-9.66275
				101.696	-12.3148
				127.409	-13.6004
				147.254	-14.2008
				160.675	-14.4477
				167.576	-14.3022
				168.402	-13.7917
				164.526	-13.2009
				158.04	-12.8708
				150.781	-12.9763
				143.466	-13.3935
				135.791	-13.5894
				127.212	-12.7585
				117.261	-10.3324
				105.4	-6.53049
				91.2912	-2.32912
				75.3885	1.18096
				59.0763	3.29071
				44.3003	3.77517
				33.1839	2.95292
				27.5386	1.57833
				27.4857	0.371414
				29.8171	-0.337352
				28.3875	-0.459334
				17.2615	0.21099
				-5.45921	2.02942
				-35.4834	4.91108
				-62.8191	7.80635
				-74.9563	9.22149
				-61.7043	8.20546
				-19.6733	4.68457
				45.3957	-0.77488
				119.695	-7.23232
				186.208	-13.5322
				231.782	-18.4562
				252.474	-21.1197
				253.513	-21.5601
				243.988	-20.6742
				229.822	-19.1584
				209.585	-16.687
				176.01	-12.4803
				122.028	-6.42484
				46.4696	0.703873
				-44.6823	7.86555
				-140.517	14.3096
				-227.241	19.5794
				-290.129	23.1915
				-317.673	24.5955
				-306.381	23.495
				-262.099	19.9254
				-196.793	14.1388
				-124.429	6.99976
				-58.6362	0.314217
				-10.4027	-4.09519
				14.86	-5.81947
				17.9853	-5.88632
				3.58484	-5.27802
				-23.0254	-3.87068
				-56.9358	-1.00188
				-93.101	3.33123
				-127.624	8.19104
				-161.48	12.4515
				-200.927	15.6424
				-250.996	18.157
				-307.82	20.6076
				-357.703	22.9007
				-383.64	24.1967
				-374.362	23.782
				-330.639	21.6355
				-265.489	18.3294
				-198.058	14.7005
				-144.198	11.4861
				-108.932	9.0216
				-85.7281	6.98855
				-63.1427	4.57818
				-33.3841	1.38981
				3.7653	-1.9463
				43.0353	-4.39331
				78.0839	-5.52441
				104.661	-5.69287
				121.779	-5.5247
				131.569	-5.47906
				138.157	-5.70404
				145.647	-6.12454
				156.198	-6.68941
				169.611	-7.60038
				184.521	-9.25169
				199.761	-11.8525
				214.382	-15.049
				226.424	-17.9123
				232.412	-19.4614
				228.796	-19.296
				214.326	-17.6956
				191.434	-15.3265
				165.502	-12.9199
				142.5	-10.9511
				126.462	-9.56785
				117.9	-8.82261
				113.849	-8.74747
				109.614	-9.1799
				100.676	-9.64699
				83.4495	-9.3751
				55.955	-7.53715
				19.401	-3.86582
				-20.8613	0.844448
				-56.7551	5.02983
				-80.8409	7.38801
				-89.5819	7.69638
				-84.4982	6.71035
				-70.7005	5.41104
				-54.3247	4.20405
				-40.7493	2.85512
				-33.899	1.40713
				-35.7396	0.801546
				-45.7139	2.20839
				-60.6863	5.88012
				-75.2691	10.6771
				-82.577	14.5014
				-76.8772	15.5005
				-57.6953	13.4534
				-31.2615	9.94369
				-6.95873	6.92073
				8.2712	5.25149
				13.3349	4.61782
				12.8423	4.20444
				14.8261	3.10678
				27.8248	0.527019
				57.4616	-3.80105
				103.437	-9.35934
				159.044	-15.252
				213.628	-20.7866
				256.969	-25.5672
				284.745	-29.3865
				301.94	-32.2825
				319.347	-34.3982
				344.092	-35.6331
				372.465	-35.6684
				391.072	-34.2411
				383.603	-31.0392
				337.36	-25.4713
				247.972	-16.9952
				122.817	-5.89956
				-18.6098	6.21147
				-149.001	16.7187
				-242.401	23.0818
				-286.384	24.3882
				-289.468	22.1585
				-276.18	19.3664
				-273.348	18.5493
				-298.163	20.5597
				-354.039	24.6163
				-433.162	29.4965
				-521.498	34.6905
				-602.925	40.2756
				-661.969	45.9423
				-686.5	50.515
				-670.38	52.4403
				-614.22	50.6662
				-524.168	45.1015
				-410.466	36.4282
				-285.995	25.7865
				-164.163	14.7585
				-56.2609	5.22283
				31.1246	-1.40067
				97.5279	-5.0083
				147.788	-6.91418
				189.294	-8.9673
				228.213	-12.2255
				266.12	-16.3579
				299.384	-20.3273
				322.289	-23.3614
				331.472	-25.1982
				327.968	-25.7505
				315.605	-24.8551
				298.184	-22.5719
				278.936	-19.6385
				262.387	-17.2012
				255.001	-16.0574
				262.457	-16.3696
				285.385	-17.9116
				315.859	-20.248
				336.621	-22.4624
				325.638	-22.9069
				265.216	-19.8483
				150.022	-12.6465
				-10.0347	-2.19299
				-191.776	9.6483
				-364.766	20.8548
				-499.769	29.7701
				-575.757	35.2173
				-583.343	36.3951
				-525.526	32.9376
				-416.418	25.2261
				-278.595	14.7002
				-139.334	3.7436
				-24.2922	-5.14021
				50.3858	-10.391
				82.6506	-11.8879
				82.368	-10.6881
				64.0013	-8.30842
				39.7418	-5.91737
				17.2391	-3.88144
				0.7295	-1.87286
				-7.82919	0.643198
				-8.51352	3.8159
				-2.99136	7.06733
				6.45186	9.28214
				17.9867	9.45062
				31.1485	7.3854
				47.1493	3.98393
				68.0061	0.679042
				94.7838	-1.69644
				126.367	-3.70335
				159.893	-6.77606
				192.507	-11.6426
				222.754	-17.3041
				250.188	-21.7493
				274.011	-23.6927
				292.386	-23.5883
				302.32	-23.0201
				299.372	-23.2238
				278.596	-24.114
				237.91	-24.4261
				181.38	-22.7119
				118.838	-18.455
				61.8401	-12.5844
				19.2215	-7.05809
				-5.3894	-3.6187
				-13.9181	-2.62487
				-12.1463	-3.07553
				-6.41577	-3.60947
				-0.390894	-3.36892
				6.30222	-2.33226
				16.738	-1.21859
				33.3423	-0.869381
				54.9671	-1.56385
				76.9692	-2.94477
				93.8235	-4.26378
				101.457	-4.72252
				98.206	-4.16116
				85.3588	-3.26011
				67.4997	-2.68878
				51.2544	-2.54505
				41.6269	-2.62372
				38.5244	-2.64759
				37.4243	-2.43485
				33.4436	-2.01084
				23.4766	-1.25578
				4.31293	0.401741
				-28.9856	3.56629
				-80.4174	8.21746
				-148.205	13.6759
				-222.915	19.0985
				-290.406	23.7794
				-337.539	27.0646
				-357.152	28.2497
				-349.504	26.8298
				-320.276	23.1058
				-277.657	18.3317
				-230.15	13.8772
				-185.173	10.4999
				-148.164	8.46739
[truncated: 921 more rows]

## Sheet: Participant 09
MTP_moment	Plantar_Aponuerosis_Length	MTP_angle	Time	AbductorHallucis	FlexorDigitorumBrevis
NaN	NaN	-36.2268	0	46.1222	-40.7108
NaN	NaN	-36.2829	0.0071	33.1464	-39.7256
NaN	NaN	-36.295	0.0142	22.0874	-36.7626
NaN	NaN	-36.2111	0.0213	7.52904	-31.2055
NaN	NaN	-36.0351	0.0284	-15.1448	-22.8958
NaN	NaN	-35.7938	0.0355	-47.0788	-12.4558
NaN	NaN	-35.517	0.0426	-84.7618	-1.08115
NaN	NaN	-35.2336	0.0497	-121.645	9.75131
NaN	NaN	-34.9563	0.0568	-151.249	18.5865
NaN	NaN	-34.6968	0.0639	-169.602	24.7928
NaN	NaN	-34.4551	0.071	-176.399	29.3253
NaN	NaN	-34.1997	0.0781	-174.704	34.4301
NaN	NaN	-33.8898	0.0852	-169.306	42.1232
NaN	NaN	-33.4821	0.0923	-164.684	52.5931
NaN	NaN	-32.9932	0.0994	-163.122	64.0773
NaN	NaN	-32.4433	0.1065	-163.069	74.3701
NaN	NaN	-31.8782	0.1136	-158.956	82.745
NaN	NaN	-31.3277	0.1207	-144.045	90.862
NaN	NaN	-30.8059	0.1278	-115.157	101.696
NaN	NaN	-30.3115	0.1349	-75.4678	116.921
NaN	NaN	-29.8503	0.142	-33.2164	134.971
NaN	NaN	-29.4151	0.1491	2.0452	151.72
NaN	NaN	-29.0051	0.1562	22.8202	162.912
NaN	NaN	-28.6162	0.1633	25.4266	166.136
NaN	NaN	-28.242	0.1704	10.3061	161.379
NaN	NaN	-27.873	0.1775	-18.6064	150.29
NaN	NaN	-27.4955	0.1846	-54.8769	134.907
NaN	NaN	-27.0868	0.1917	-90.5958	117.187
NaN	NaN	-26.6297	0.1988	-117.669	99.541
NaN	NaN	-26.1086	0.2059	-129.963	84.4663
NaN	NaN	-25.5289	0.213	-125.678	72.8721
NaN	NaN	-24.9279	0.2201	-107.662	63.6354
NaN	NaN	-24.3764	0.2272	-81.059	55.0639
NaN	NaN	-23.9387	0.2343	-50.8075	46.1536
NaN	NaN	-23.6654	0.2414	-20.7435	36.827
NaN	NaN	-23.5191	0.2485	6.37189	27.5345
NaN	NaN	-23.4528	0.2556	28.7069	18.2971
NaN	NaN	-23.4527	0.2627	45.3327	8.00035
NaN	NaN	-23.4903	0.2698	56.3991	-4.91363
NaN	NaN	-23.5176	0.2769	63.1926	-21.0772
NaN	NaN	-23.4948	0.284	67.6348	-39.901
NaN	NaN	-23.3937	0.2911	71.5037	-60.1873
NaN	NaN	-23.2086	0.2982	75.9911	-80.5688
NaN	NaN	-22.9586	0.3053	81.5234	-99.7887
NaN	NaN	-22.6765	0.3124	87.6803	-116.854
NaN	NaN	-22.4205	0.3195	93.4603	-130.808
NaN	NaN	-22.2408	0.3266	97.7062	-140.641
NaN	NaN	-22.142	0.3337	99.4346	-145.689
NaN	NaN	-22.1239	0.3408	98.3947	-145.771
NaN	0.186829	-22.1776	0.3479	95.4822	-141.027
NaN	0.186732	-22.2693	0.355	92.1477	-131.977
NaN	0.186563	-22.3809	0.3621	89.5624	-119.463
NaN	0.186347	-22.5026	0.3692	88.4544	-104.448
NaN	0.186099	-22.6383	0.3763	88.8049	-88.0722
NaN	0.185851	-22.8067	0.3834	89.3937	-71.6427
NaN	0.185633	-23.0366	0.3905	88.4255	-56.4159
NaN	0.185478	-23.3565	0.3976	84.9182	-43.4099
NaN	0.185394	-23.7447	0.4047	79.2366	-33.2852
NaN	0.18539	-24.164	0.4118	72.4129	-26.266
NaN	0.185439	-24.5604	0.4189	65.485	-22.0354
NaN	0.185513	-24.8904	0.426	59.5142	-19.5785
NaN	0.185573	-25.127	0.4331	55.4788	-17.1381
NaN	0.185601	-25.283	0.4402	53.5937	-12.6833
NaN	0.185589	-25.3949	0.4473	53.0355	-4.83485
NaN	0.18555	-25.5278	0.4544	52.7659	6.68456
NaN	0.185477	-25.7333	0.4615	52.4012	21.5967
NaN	0.185375	-26.0257	0.4686	51.9391	39.8372
NaN	0.185248	-26.4044	0.4757	50.8468	61.5091
NaN	0.185109	-26.856	0.4828	47.4675	85.9525
NaN	0.184972	-27.3449	0.4899	38.7529	110.852
22.7208	0.184851	-27.8443	0.497	20.8297	132.694
21.1842	0.184736	-28.3349	0.5041	-8.55185	148.624
19.8031	0.184611	-28.8145	0.5112	-47.155	157.198
18.5101	0.184465	-29.2904	0.5183	-88.015	156.632
17.2042	0.1843	-29.7846	0.5254	-122.097	143.567
15.894	0.184131	-30.3336	0.5325	-141.708	115.076
14.5963	0.183975	-30.9464	0.5396	-142.818	71.9687
13.316	0.183855	-31.6371	0.5467	-125.383	20.0651
12.0453	0.183768	-32.3898	0.5538	-92.1745	-30.9907
10.834	0.183713	-33.1923	0.5609	-47.5456	-69.8817
9.71084	0.183679	-34.0305	0.568	3.47312	-86.3405
8.6251	0.18366	-34.8989	0.5751	55.6442	-75.0309
7.45839	0.183676	-35.837	0.5822	103.114	-39.5441
6.22243	0.183731	-36.8724	0.5893	139.289	6.97402
4.94646	0.183826	-38.0526	0.5964	158.687	46.7994
3.56027	0.183931	-39.388	0.6035	159.812	65.5237
2.14695	0.184016	-40.8867	0.6106	146.351	58.0724
0.873174	0.184051	-42.5636	0.6177	125.405	30.1759
-0.298541	0.184023	-44.3956	0.6248	103.618	-5.15636
-1.34792	0.183909	-46.407	0.6319	83.1584	-34.4593
-2.12762	0.18373	-48.5321	0.639	59.708	-49.9525
-2.69878	0.18351	-50.67	0.6461	24.4931	-51.2965
-2.97238	0.183287	-52.6205	0.6532	-29.5363	-43.1924
-2.84257	0.183091	-54.1388	0.6603	-101.728	-32.0333
-2.3655	0.182944	-54.8234	0.6674	-183.14	-23.3708
-1.62939	0.182847	-54.5915	0.6745	-261.048	-20.2235
-0.960571	0.182826	-53.2389	0.6816	-323.822	-22.254
-0.528372	0.18289	-51.0606	0.6887	-363.287	-26.0927
-0.164316	0.18305	-48.3951	0.6958	-375.473	-27.4427
0.162004	0.183315	-45.644	0.7029	-360.774	-24.1977
0.335548	0.183662	-43.1296	0.71	-323.117	-17.7798
				-268.438	-11.8245
				-203.405	-10.3091
				-134.68	-16.1572
				-68.6064	-30.0362
				-10.9746	-50.0382
				33.6678	-72.5566
				62.9826	-93.6351
				77.4306	-110.686
				79.6884	-124.196
				72.9305	-137.517
				59.7581	-153.887
				42.7517	-173.279
				25.1564	-192.236
				10.7163	-206.456
				3.07124	-213.645
				4.65557	-214.756
				15.578	-213.112
				34.0724	-212.383
				58.127	-214.89
				85.7697	-220.617
				113.486	-226.703
				135.424	-227.736
				145.64	-217.674
				141.894	-193.451
				127.141	-158.001
				107.338	-119.092
				88.1294	-84.0124
				73.0985	-55.4768
				63.3517	-32.7727
				57.5823	-15.1243
				53.1926	-2.26451
				48.2949	7.3203
				42.6903	16.8416
				37.2171	29.6576
				32.6118	47.3939
				28.8795	69.2673
				25.5663	93.7293
				22.2881	121.472
				18.7432	156.566
				14.6901	203.952
				10.1575	264.737
				5.34942	333.284
				0.36654	399.581
				-4.72472	454.309
				-9.50296	491.144
				-13.0193	506.445
				-14.2965	499.666
				-12.9757	474.08
				-9.42772	435.681
				-4.71768	390.379
				-0.292261	341.278
				2.94997	288.464
				5.07875	231.597
				6.59726	172.164
				7.85632	113.735
				8.75901	61.3229
				8.64708	20.1697
				6.62279	-6.09863
				2.52169	-17.488
				-2.34625	-18.8882
				-5.83831	-18.5646
				-6.50843	-23.7911
				-4.45227	-37.379
				-0.902658	-57.9499
				2.61835	-82.5764
				4.98874	-108.629
				5.96343	-133.057
				6.02297	-150.876
				5.42493	-156.434
				3.51539	-147.21
				-0.535573	-125.976
				-6.33324	-99.1494
				-12.1092	-73.0001
				-16.1392	-50.9023
				-18.0608	-33.3361
				-18.6309	-19.5291
				-18.5121	-8.73745
				-17.8008	-0.526539
				-16.5197	5.33248
				-14.8107	8.85295
				-12.6814	10.057
				-10.0896	9.3336
				-7.22554	7.33195
				-4.77155	5.13142
				-4.22925	5.21893
				-7.61204	11.9355
				-15.9894	30.347
				-28.0699	63.3982
				-40.7217	108.179
				-51.2748	155.084
				-59.004	192.205
				-64.3719	210.545
				-67.5728	205.468
				-68.1066	175.713
				-65.5162	123.556
				-60.3912	56.6144
				-54.3591	-13.0581
				-48.7518	-75.1541
				-43.4416	-126.652
				-37.2503	-170.373
				-29.3603	-209.369
				-20.4055	-243.018
				-12.5302	-266.773
				-8.20889	-274.792
				-8.59643	-262.813
				-12.6858	-230.136
				-17.4278	-182.363
				-18.406	-132.623
				-11.767	-96.8107
				2.73727	-85.0232
				20.9417	-96.423
				37.3985	-121.666
				48.9159	-150.234
				55.2702	-175.644
				57.7426	-194.824
				57.5018	-205.417
				55.0362	-205.233
				50.4621	-192.802
				43.7992	-167.832
				34.952	-131.77
				23.9771	-87.2111
				11.6013	-36.0615
				-0.804199	20.6685
				-11.7615	80.2382
				-20.1258	135.989
				-25.4338	179.277
				-28.1708	203.648
				-29.4012	206.311
				-30.0409	187.161
				-30.8437	149.748
				-32.5884	103.997
				-35.4956	64.5989
				-38.6711	42.931
				-40.3038	40.1189
				-38.3896	48.7013
				-31.5892	59.917
				-19.7426	68.647
				-3.91728	72.9679
				13.8769	71.8849
				31.2126	65.3569
				45.7284	55.5349
				55.5702	45.1013
				60.0244	33.0396
				59.7139	13.9272
				55.8522	-16.7296
				49.5962	-57.2529
				42.2503	-100.28
				35.5045	-137.224
				30.6496	-162.33
				27.305	-174.209
				23.7516	-175.14
				18.8592	-169.462
				13.1175	-161.511
				8.02633	-153.281
				4.92004	-143.756
				4.11372	-130.996
				4.99373	-114.5
				6.66382	-95.5544
				8.33633	-76.3839
				9.62187	-59.3331
				10.701	-46.4272
				11.9667	-39.2499
				13.499	-38.5854
				14.8285	-43.7034
				15.0548	-51.8806
				13.3922	-58.4362
				10.0781	-57.7846
				6.94755	-45.8573
				6.34562	-22.1662
				8.83203	10.0973
				12.7428	44.9484
				16.2584	74.8347
				18.8274	93.26
				20.5476	98.3022
				21.1198	94.0319
				19.7123	87.7425
				15.7992	84.6184
				10.0926	84.2839
				4.41406	82.0654
				0.586479	72.905
				-0.46984	54.4277
				0.972451	28.4159
				3.54121	0.784356
				5.42643	-20.3511
				5.38818	-28.1237
				3.33581	-20.7284
				0.369585	-3.13468
				-1.55163	15.8106
				-0.908561	29.2254
				1.61954	35.8835
				3.35512	39.1509
				1.9059	43.3724
				-3.17952	50.9281
				-10.4004	60.8215
				-17.2533	68.9998
				-21.6532	70.8953
				-23.0121	64.6989
				-22.3012	52.828
				-21.2197	40.728
				-20.9968	33.9926
				-21.733	35.8168
				-22.8091	46.1764
				-23.6532	62.3006
				-24.0939	79.6273
				-24.4257	93.3737
				-25.3101	100.772
				-27.2945	102.656
				-30.0632	102.602
				-32.2691	103.844
				-32.4437	106.855
				-29.882	109.695
				-24.6058	109.889
				-17.1899	105.749
				-8.89465	96.8266
				-1.51426	84.1867
				3.34521	70.4863
				5.16606	59.0469
				4.80208	51.9483
				3.77823	48.7364
				3.30084	46.932
				3.81924	43.8353
				5.19209	38.2432
				7.025	30.8115
				8.96649	22.9076
				10.815	15.1729
				12.3179	6.9322
				13.206	-3.3515
				13.5962	-17.0193
				13.6726	-34.1197
				12.6893	-52.4906
				9.31841	-67.9907
				3.44701	-76.831
				-3.27915	-78.0478
				-8.88552	-73.5752
				-12.5531	-66.4961
				-14.7821	-59.2612
				-16.3426	-52.7514
				-17.3824	-46.5763
				-17.6929	-40.1073
				-17.398	-33.1424
				-17.0137	-25.9866
				-16.9793	-19.2582
				-17.3545	-13.5135
				-17.9031	-8.75686
				-18.3747	-4.05222
				-18.7009	2.3148
				-18.8086	11.9518
				-18.3047	25.0221
				-16.7974	39.4899
				-14.7864	52.4158
				-13.5758	62.1881
				-13.8219	68.6343
				-14.8072	71.3319
				-15.3485	69.0987
				-14.767	61.0403
				-12.8348	47.3214
				-9.38476	28.8561
				-4.42005	6.63179
				1.55215	-18.205
				7.57617	-43.5758
				12.721	-66.4315
				16.5232	-83.9749
				19.0548	-94.7952
				20.6536	-98.7365
				21.4929	-96.1749
				21.3985	-87.976
				20.3461	-76.1177
				19.0877	-63.6186
				18.6112	-53.138
				18.8156	-45.633
				18.5695	-40.7199
				17.2151	-38.376
				15.1587	-39.5875
				13.0313	-44.7542
				11.068	-52.1554
				9.35223	-58.8301
				8.18653	-62.6559
				8.06721	-62.9232
				9.33792	-59.2263
				11.6935	-50.8633
				13.822	-37.6164
				13.6407	-20.3772
				9.26959	-0.465068
				0.328436	21.4001
				-11.306	44.8343
				-21.9066	68.3258
				-26.8744	88.706
				-21.4211	102.681
				-1.75969	108.746
				31.9957	107.766
				73.2146	102.224
				109.962	94.7758
				129.874	87.1204
				125.413	79.8133
				96.7123	72.5799
				51.0851	64.7051
				-0.00207323	55.6226
				-45.1051	45.4851
				-76.5475	35.1053
				-92.0176	25.3036
				-93.7732	16.3622
				-86.6241	7.89544
				-75.7362	-1.04306
				-65.1518	-11.736
				-57.4345	-25.2909
				-53.6509	-41.8514
				-53.1497	-60.4381
				-53.7843	-79.8499
				-53.1902	-99.4771
				-50.5009	-119.09
				-46.4565	-137.974
				-41.4043	-154.506
				-34.0736	-166.789
				-22.8787	-173.603
				-7.65388	-174.644
				10.4105	-170
				29.9078	-159.967
				49.6626	-146
				68.4474	-131.161
				84.8285	-118.688
				97.3717	-110.265
				104.984	-105.439
				107.246	-101.989
				104.736	-97.3181
				99.001	-89.9681
				91.8091	-79.9528
				84.3082	-68.112
				77.0006	-55.2566
				70.22	-41.5519
				64.1734	-26.4593
				58.7907	-9.27888
				53.8889	10.1393
				49.2	31.2841
				44.2844	53.3618
				38.7017	75.2248
				32.16	94.9736
				24.6553	110.321
				16.4842	119.921
				7.7098	124.229
				-2.12806	124.382
				-13.5328	120.274
				-26.8099	110.748
				-42.4016	95.9836
				-60.8866	78.6625
				-82.2656	62.1133
				-105.272	48.0236
				-127.247	36.562
				-144.38	27.8817
				-152.81	22.6224
				-150.966	21.3628
				-140.884	24.1363
				-126.831	30.1312
				-113.019	37.6001
				-101.825	44.2102
				-92.6577	47.6894
				-82.7717	46.8698
				-70.1269	42.4362
				-55.507	35.9804
				-41.9034	28.453
				-32.0927	20.1486
				-26.5101	11.6298
				-23.1986	4.10781
				-19.773	-0.814736
				-15.2085	-1.71353
				-9.86434	2.17595
				-4.33448	10.7923
				1.3484	22.9973
				7.59427	36.3145
				14.5032	47.5731
				20.909	54.3726
				24.7673	55.875
				25.3773	52.6095
				24.7999	46.448
				26.6692	40.1502
				33.7398	35.3409
				46.1611	31.2124
				61.4595	26.0672
				76.1951	19.4556
				88.0357	12.6317
				96.6084	7.8942
				103.035	7.5028
				109.152	12.2465
				116.573	20.5153
				125.452	29.0896
				133.789	35.2783
				138.095	38.4742
				134.8	39.847
				121.353	40.6851
				96.7708	40.9262
				61.7694	39.2079
				18.9964	34.2768
				-26.4172	25.9481
				-67.4171	14.7018
				-97.4141	1.12552
				-112.91	-13.7795
				-114.622	-28.0386
				-106.649	-38.9282
				-94.5262	-44.0165
				-83.2918	-42.2058
				-76.1741	-34.1781
				-74.2709	-22.2099
				-76.96	-9.37462
				-82.2504	1.63561
				-87.0831	9.31038
				-88.187	13.3412
				-83.3962	14.0686
				-72.4207	11.8582
				-56.3344	7.02559
				-36.6738	0.0708459
				-15.153	-8.38387
				6.85482	-17.7122
				29.2512	-27.085
				52.8447	-35.1579
				77.5427	-40.2109
				101.059	-41.0662
				119.449	-38.0863
				129.105	-33.0639
				128.719	-27.9672
				119.934	-23.8446
				106.589	-20.7721
				93.1695	-18.4227
				83.168	-16.6672
				78.1908	-15.8662
				78.1109	-16.5569
				81.4129	-18.9598
				84.9053	-22.9093
				83.6358	-27.8898
				72.2925	-32.8493
				47.1845	-36.2572
				7.25455	-36.6416
				-44.9796	-33.1678
				-102.306	-26.0085
				-153.728	-16.4019
				-188.041	-6.17793
				-198.364	2.95512
				-185.413	9.92573
				-157.454	14.6166
				-126.407	17.7622
				-102.166	20.2345
				-88.7394	22.2198
				-84.0765	22.8885
				-82.691	20.8854
				-79.1124	15.3794
				-70.1768	6.85032
				-55.4936	-2.79976
				-36.9673	-10.9314
				-17.784	-15.5002
				-0.805749	-15.8858
				12.3466	-12.5917
				20.6328	-6.58283
				23.2525	1.26894
				20.7781	10.3522
				15.6851	19.8296
				11.3513	28.3332
				11.0653	34.4207
				17.6491	37.1258
				32.9383	36.0705
				56.5409	31.2652
				84.54	23.1188
				109.932	12.7504
				125.381	1.8499
				126.684	-8.09487
				114.704	-16.5442
				94.4094	-23.9361
				71.9094	-30.7432
				51.9297	-36.6059
				36.8448	-40.6915
				27.0597	-42.7298
				21.9811	-43.8366
				20.3698	-46.5402
				20.3921	-53.4185
				20.4681	-65.0747
				20.0355	-79.2092
				19.2718	-91.5757
				18.472	-98.2433
				17.755	-97.7346
				17.0581	-91.2985
				16.2005	-81.2692
				14.886	-69.5469
				12.8044	-57.3293
				10.001	-45.3104
				6.96979	-33.5631
				4.03267	-21.3047
				0.889598	-7.11862
				-2.89514	10.0588
				-7.10868	29.5362
				-10.654	48.1732
				-12.0877	61.4344
				-10.9936	65.99
				-9.30486	62.2037
				-10.4517	54.2418
				-16.5776	47.2422
				-27.1235	43.9098
				-39.9953	43.3562
				-53.3013	42.9128
				-66.1071	40.9793
				-78.1678	37.9388
				-88.9915	34.7748
				-97.0635	31.6335
				-100.281	27.845
				-97.3332	23.1162
				-88.5745	18.3599
				-75.6006	14.83
				-60.2283	12.4286
				-43.8198	9.21834
				-27.0539	2.86125
				-9.97204	-7.04623
				7.71877	-17.9514
				25.9344	-25.9142
				43.2724	-28.2276
				57.3081	-24.9137
				66.3757	-18.3955
				70.3266	-11.7172
				69.5257	-6.7182
				64.2938	-3.47184
				55.6294	-0.904768
				45.8949	2.06234
				38.5304	5.61664
				36.8532	9.17372
				42.5047	12.2217
				54.4708	14.7999
				69.5263	17.1607
				84.0508	19.1408
				95.8497	20.2095
				104.627	20.2535
				111.273	19.8434
				116.783	19.6622
				121.183	20.1662
				122.759	21.6935
				118.642	24.4109
				107.137	28.1109
				89.2044	32.2143
				66.4706	36.0978
				37.8603	39.5488
				-0.720691	42.894
				-52.5105	46.6478
				-115.226	50.9837
				-179.552	55.2442
				-231.323	57.9086
				-256.205	57.5715
				-245.875	54.0355
				-203	48.0364
				-141.114	40.191
				-78.2993	30.8166
				-28.8832	20.6445
				0.910511	11.1981
				11.6674	4.29462
				6.94542	1.12678
				-10.1342	1.56883
				-38.5502	4.20925
				-77.8172	7.17127
				-124.233	9.00964
				-169.485	9.00783
				-203.148	6.96013
				-215.866	2.85583
				-201.506	-3.10325
				-159.469	-10.2471
				-96.2529	-17.5472
				-23.9113	-24.039
				43.9649	-29.0005
				96.441	-31.8502
				128.378	-32.2267
				141.765	-30.4422
				144.879	-27.7784
				150.01	-26.0752
				170.503	-26.881
				216.526	-30.7744
				289.749	-37.1611
				379.408	-44.7467
				462.689	-52.1975
				510.876	-58.0086
				499.715	-60.1047
				418.373	-56.2847
				271.438	-45.2611
				75.6474	-27.8036
				-142.969	-7.3523
				-351.85	11.0912
				-518.993	23.3694
				-623.25	27.835
				-661.3	25.3779
				-646.337	18.3567
				-599.265	9.43776
				-538.248	1.12561
				-472.656	-4.59315
				-403.438	-7.09188
				-327.922	-7.25133
				-244.886	-6.16744
				-156.559	-4.0533
				-68.0295	-0.825962
				14.0242	2.86796
				83.4891	5.94215
				137.249	7.7524
				175.56	8.17563
				200.473	7.23839
				214.387	5.04837
				219.54	1.86679
				218.191	-2.01835
				212.902	-6.61712
				206.244	-12.2142
				199.841	-18.593
				193.737	-24.5455
				186.991	-28.7563
				178.792	-30.9579
				169.047	-31.7956
				158.163	-31.9681
				146.421	-31.8989
				133.801	-31.7282
				120.659	-31.0363
				107.987	-28.845
				96.5585	-24.456
				86.5711	-18.2971
				78.3029	-11.6847
				72.1742	-5.78335
				68.0072	-1.00073
				64.598	2.64671
				60.1731	5.08718
				53.4052	6.34571
				43.9088	6.74051
				31.8555	6.88915
				17.8683	7.68541
				3.77547	9.77448
				-6.91574	12.6371
				-9.75283	14.4469
				-1.05938	13.2288
				20.1135	8.35906
				51.0484	0.936442
				86.1624	-7.14751
				118.791	-14.1797
				142.724	-19.0324
				153.205	-21.3297
				148.15	-21.3505
				129.465	-19.6302
				102.665	-16.6597
				74.3848	-13.0005
				49.7651	-9.46321
				31.3614	-6.66096
				19.4949	-4.2162
				12.9806	-0.841097
				9.59038	4.436
				6.71955	11.2836
				2.56421	18.4186
				-3.02907	24.6155
				-9.13091	29.179
				-15.2204	31.6992
				-21.6758	31.7625
				-28.7926	29.2811
				-35.9088	25.1356
				-41.8196	21.0565
				-46.181	18.5551
				-50.6486	17.9271
				-58.2337	18.3722
				-71.048	19.2406
				-88.7831	21.0039
				-109.138	24.6608
				-129.181	30.3122
				-146.484	36.6164
				-159.829	41.5893
				-169.957	43.8909
				-179.818	43.4429
				-192.956	41.0385
				-210.435	37.6972
				-228.659	34.2888
				-240.46	31.2017
				-239.258	27.9933
				-222.851	23.4862
				-193.832	16.699
				-157.352	7.96333
				-118.586	-1.10662
				-81.4107	-8.83314
				-48.0055	-14.4256
				-18.3894	-18.069
				9.34267	-20.73
				36.9786	-23.5135
				63.9476	-26.6314
				87.118	-29.3569
				102.531	-31.1163
				107.252	-32.3012
				100.093	-33.9349
				81.8677	-36.6067
				55.8996	-40.0081
				27.4304	-43.4288
				1.17213	-46.2203
				-20.5167	-47.9007
				-37.167	-48.2327
				-49.2923	-47.358
				-58.4058	-45.7659
				-66.2505	-43.8957
				-72.4104	-41.7316
				-73.7192	-38.8162
				-67.6018	-34.5315
				-55.2151	-28.5576
				-40.4901	-21.4364
				-26.8505	-14.4728
				-14.7965	-8.81561
				-1.45592	-4.91785
				18.2463	-2.82848
				49.8175	-2.51177
				97.3159	-3.74893
				160.708	-5.80839
				232.662	-7.31079
				298.021	-6.79851
				339.216	-3.74796
				344.951	1.08497
				315.7	6.47826
				262.87	11.8885
				203.078	17.6568
				151.013	24.098
				114.2	30.7075
				91.2855	36.2606
				74.3831	39.5271
				54.9033	40.2482
				29.369	39.5586
				0.833399	39.1244
				-24.381	39.6713
				-41.5373	40.3981
				-51.2786	39.9998
				-60.4857	38.1168
				-79.1684	35.6163
				-114.642	33.7874
				-166.562	33.4631
				-226.23	34.8122
				-280.354	37.7057
				-316.649	41.6481
				-328.714	45.1826
				-317.776	46.2839
				-290.013	43.7987
				-252.333	38.1215
				-210.514	30.7641
				-169.307	23.4685
				-132.248	17.0873
				-100.764	11.2228
				-73.7315	5.30327
				-48.6108	-0.249594
				-23.3437	-4.36714
				2.55803	-6.65062
				27.9788	-7.74686
				50.931	-8.37642
				69.711	-8.57718
				83.6849	-8.17695
				93.3049	-7.52365
				99.6044	-7.30673
				103.497	-7.88608
				105.482	-9.11765
				106.156	-10.7928
				106.737	-12.9954
				108.587	-15.9404
				112.14	-19.5777
				116.534	-23.2281
				120.233	-25.4813
				122.136	-24.8181
				122.855	-20.9319
				125.013	-15.3933
				131.55	-10.3807
				143.427	-7.02762
				158.541	-5.52608
				172.022	-5.87721
				177.799	-7.82047
				171.094	-10.7335
				150.298	-13.8799
				117.365	-16.6193
				77.5278	-18.7577
				38.6694	-20.7743
				9.64877	-23.4603
				-2.40069	-27.2838
				5.15193	-32.022
				28.9139	-37.0244
				60.7784	-41.7368
				91.4595	-45.5939
				112.825	-47.707
				117.969	-47.2332
				102.161	-43.7629
				65.7448	-37.2364
				15.3052	-28.0388
				-39.3279	-17.2565
				-89.9812	-6.59976
				-133.318	2.00131
				-170.542	7.25679
				-204.202	9.54311
				-234.521	10.6556
				-258.101	12.1037
				-269.816	13.9088
				-266.026	14.9583
				-246.867	14.1673
				-216.234	11.4589
				-179.558	7.86553
				-141.17	4.8777
				-102.853	3.75198
				-63.7584	4.81254
				-21.7949	6.99454
				24.3997	8.61124
				75.2586	8.70972
				131.416	7.3295
				192.78	4.99127
				254.908	2.57308
				306.283	1.23207
				330.822	1.89412
				315.823	4.78803
				259.951	9.3662
				175.067	14.6191
				80.8499	19.6165
				-3.75712	23.8181
				-67.6103	27.0589
				-110.025	29.3245
				-138.249	30.3135
				-161.919	29.5032
				-187.855	27.1236
				-216.856	24.5921
				-243.254	23.4317
				-258.514	23.9643
				-257.388	25.0554
				-241.295	25.0951
				-216.319	23.4514
				-189.161	20.6839
				-164.537	17.4983
				-144.098	14.1633
				-126.283	10.674
				-107.533	6.9767
				-84.7475	3.1205
				-57.4594	-0.709888
				-27.9237	-4.20075
				0.715477	-6.67213
				26.29	-7.07251
				48.0706	-4.88122
				65.8908	-0.974359
				79.2893	2.76018
				87.8706	4.46257
				92.2602	3.16147
				94.1243	-0.622946
				94.9453	-5.06529
				94.805	-8.31496
				92.6851	-9.7154
				88.0051	-9.7826
				81.4514	-9.53284
				74.4004	-10.1571
				67.9688	-12.635
				62.5643	-17.0622
				58.1434	-22.5624
				54.819	-27.9571
				52.9353	-32.4603
				52.3331	-35.9974
				51.8777	-39.1432
				50.0064	-42.6202
				45.6608	-46.5996
				38.8407	-50.5836
				30.6114	-53.8899
				22.902	-55.9995
				18.3816	-56.6499
				19.8755	-55.7552
				28.9877	-53.165
				44.8616	-48.7199
				64.4273	-42.6326
				83.9845	-35.5735
				100.609	-28.4513
				112.746	-22.2038
				119.971	-17.2829
				122.064	-12.9438
				118.553	-7.67107
				109.305	-0.771222
				94.9608	7.13866
				76.6896	15.2445
				56.2122	23.047
				36.095	29.8034
				19.3675	34.5479
				8.32883	36.8352
				3.30001	37.0438
				2.41999	36.0279
				2.99607	34.5001
				3.25939	32.6578
				2.55331	30.5628
				-0.0465937	28.6974
				-6.35984	27.757
				-18.3108	28.1666
				-37.3655	30.0788
				-64.0408	33.3656
				-96.4473	37.327
				-129.58	40.7665
				-157.172	42.6796
				-174.545	42.8639
				-179.967	41.698
				-174.418	39.4915
				-160.943	36.3629
				-143.54	32.4745
				-125.403	27.9998
				-107.822	23.096
				-90.7626	18.13
				-74.0166	13.6501
				-57.4898	10.0711
				-40.7553	7.4673
				-23.1259	5.46316
				-4.69285	3.39726
				13.354	0.726369
				29.8451	-2.58198
				44.2964	-5.73859
				56.3174	-7.5598
				65.0262	-7.60141
				69.4568	-6.58814
				69.5641	-5.67969
				66.5352	-5.66989
				62.0759	-6.77781
				57.4996	-8.59715
				53.225	-10.0528
				48.9912	-9.74954
				44.6016	-6.79831
				40.4148	-1.58552
				37.1753	4.35882
				35.5209	9.3047
				35.8888	12.1143
				39.0986	12.6538
				46.4515	11.9149
				58.3412	11.3833
				72.8734	11.9001
				86.1238	13.2636
				93.6964	14.7643
				92.8126	15.6126
				83.7176	15.101
				69.3742	12.8514
				54.0859	8.80198
				41.7543	2.92526
				34.1657	-4.71197
				30.6059	-13.4881
				29.2213	-22.0291
				28.5711	-28.8503
				28.0635	-33.473
				27.4129	-36.7937
				25.8968	-40.2387
				21.9739	-44.6397
				13.2695	-49.6917
				-3.29003	-53.9704
				-31.5981	-55.3928
				-76.3275	-52.2745
				-140.54	-44.4071
				-220.975	-33.1616
				-305.65	-20.7958
				-377.099	-9.69939
				-419.331	-1.77024
				-424.117	2.1135
				-392.616	2.34421
				-332.215	0.279489
				-252.545	-2.29207
				-163.254	-3.64961
				-73.1081	-2.97356
				10.115	-0.995114
				79.476	0.618025
				129.209	0.903326
				155.319	0.744515
				156.501	2.18708
				135.734	6.50096
				101.274	13.0641
				65.0469	20.0149
				38.4975	25.5531
				28.9181	28.5902
				38.5883	28.7886
				65.5873	26.4517
				104.351	22.2405
				145.341	17.1587
				174.648	13.0397
				176.289	12.1906
				138.384	15.8652
				60.003	23.4476
				-45.8825	32.9602
				-155.632	41.8303
				-242.954	47.5493
				-287.731	48.2783
				-282.01	43.3527
				-231.219	33.7018
				-150.153	21.587
				-55.8254	9.20166
				38.7935	-2.61862
				126.606	-13.9547
				203.527	-24.4181
				265.648	-32.8665
				310.069	-38.1667
				337.002	-39.8358
				350	-38.4534
				354.316	-35.6509
				354.865	-33.1691
				355.484	-31.7186
				359.334	-30.9821
				368.174	-30.6594
				379.751	-30.9137
				385.972	-31.4587
				374.605	-30.8509
				334.265	-27.4329
				259.882	-20.7958
				155.337	-11.8608
				31.8516	-1.88298
				-95.8977	8.10762
				-213.023	17.2168
				-307.384	24.5057
				-373.554	28.9705
				-415.065	29.8987
				-442.02	27.5658
				-465.543	23.4708
				-492.074	19.4996
				-520.214	16.8238
				-541.756	15.5176
				-545.849	14.7102
				-523.967	12.9336
				-473.561	8.78945
				-399.01	1.71242
				-309.98	-7.75566
				-217.821	-18.3291
				-131.565	-28.6348
				-55.9184	-37.6351
				8.30193	-44.599
				62.5669	-49.2208
				109.038	-51.9588
				149.546	-53.5078
				184.637	-53.5275
				212.712	-50.5528
				230.985	-43.685
				238.093	-33.8865
				235.405	-23.3338
				225.805	-13.8591
				211.916	-5.94187
				195.509	0.988162
				177.941	7.48373
				160.618	13.5801
				145.027	18.9777
				132.654	23.3486
				125.171	26.5834
				124.19	28.7392
				130.171	29.8391
				141.578	30.159
				154.977	30.6824
				165.742	32.6173
				169.465	36.1829
				163.993	40.2911
				150.264	43.6783
				130.875	45.86
				109.068	46.8015
				89.5858	46.4307
				78.6994	44.74
				82.1752	41.8539
				103.013	37.8656
				139.56	32.6976
				183.742	26.196
				221.163	18.6707
				235.303	11.347
				214.384	5.87005
				156.074	3.27758
				67.3181	3.6174
				-38.7969	6.29587
				-146.696	10.297
				-241.847	14.1419
				-313.633	16.2688
				-356.91	15.7464
				-372.091	12.5802
				-364.628	7.58507
				-344.228	2.10096
				-321.878	-2.64307
				-304.834	-6.15814
				-294.021	-8.56978
				-286.21	-10.1839
				-278.27	-11.3199
				-269.22	-12.1156
				-258.4	-12.4455
				-243.207	-12.3721
				-220.008	-12.5085
				-186.062	-13.5214
				-138.845	-15.4432
				-73.929	-17.8286
				14.7238	-20.4662
				130.734	-23.6475
				270.494	-27.6933
				422.467	-32.512
				572.14	-37.8113
				707.311	-43.2992
				816.889	-48.2902
				885.194	-51.5023
				891.576	-51.6235
				818.647	-47.7208
				661.914	-39.0968
				434.532	-25.697
				165.401	-9.03093
				-109.454	7.86173
				-357.209	21.6062
				-554.01	29.6481
				-686.52	30.7709
				-752.777	25.2536
				-762.713	14.8141
				-735.172	2.14395
				-689.631	-9.97322
				-637.462	-19.5433
				-579.813	-25.8
				-512.286	-29.1281
				-430.654	-30.688
				-333.865	-31.8121
				-225.374	-33.0835
				-113.899	-33.9022
				-11.8522	-33.2921
				68.5327	-30.746
				118.755	-26.1577
				136.786	-19.6316
				129.071	-11.5372
				109.32	-2.62624
				92.4688	5.93589
				86.974	13.1191
				91.3246	18.768
				97.1717	23.3275
				95.1425	27.0448
				78.7082	30.0422
				46.0468	32.8594
				1.04319	36.4338
				-47.7968	41.5182
				-91.014	47.9097
				-121.752	54.0336
				-136.686	57.5977
				-135.336	57.2603
				-119.675	53.6567
				-93.3333	48.4354
				-59.8073	42.8698
				-21.4358	37.7474
				20.3349	33.4369
				64.717	29.5561
				111.199	25.3462
				158.381	20.3792
				202.957	14.6473
				239.978	8.52411
				264.336	2.76053
				272.528	-1.91623
				264.229	-5.28854
				243.297	-7.63012
				217.007	-9.26114
				193.502	-10.4933
				179.202	-12.1043
				177.212	-15.2716
				186.291	-20.6137
				199.757	-27.1829
				205.737	-32.4408
				191.642	-33.6362
				151.67	-29.5847
				91.1765	-21.4634
				24.4012	-12.1299
				-32.1501	-4.36089
				-66.61	0.685891
				-75.8954	3.53172
				-65.6182	5.16817
				-46.1864	6.02481
				-27.1726	6.16918
				-12.7679	6.13794
				-0.39568	6.95649
				17.1833	9.11143
				47.5867	11.7384
				94.1345	13.0149
				152.258	11.4563
				209.088	7.02504
				248.31	1.19322
				258.371	-3.875
				237.841	-6.46692
				194.711	-6.36785
				141.887	-4.86054
				91.6285	-3.4523
				51.2221	-2.87294
				22.3909	-3.33809
				4.14039	-5.3167
				-4.09697	-9.64551
				-1.45472	-16.7143
				13.147	-25.7864
				38.4083	-35.5304
				68.1678	-44.949
				91.512	-53.3428
				96.7696	-59.9507
				77.186	-64.2918
				34.0517	-66.433
				-24.7853	-66.4519
				-89.2215	-63.9897
				-150.581	-58.7216
				-203.272	-50.9021
				-245.264	-41.2052
				-277.234	-30.5665
				-300.613	-20.2492
				-316.864	-11.3203
				-327.992	-3.86464
				-336.091	2.91429
				-342.477	10.0338
				-347.654	18.3707
				-351.166	28.2089
				-351.147	38.5015
				-344.898	46.7855
				-330.762	50.4109
				-309.674	48.5559
				-284.748	43.4613
				-259.206	39.4076
				-234.379	39.8065
				-209.208	44.8035
				-181.217	51.4035
				-147.66	55.6645
				-106.742	55.206
				-59.7425	50.5261
				-11.6909	44.1694
				32.1577	38.6313
				70.4453	35.0955
				105.126	33.4868
				137.325	32.9755
				164.79	32.5386
				183.149	31.3886
				188.988	29.0307
				182.181	25.2621
				166.238	20.3764
				146.733	15.1839
				129.005	10.6365
				116.651	7.24865
				111.482	4.5036
				114.535	0.828307
				126.993	-5.32766
				150.223	-14.2428
				184.484	-24.7838
				226.154	-34.8663
				265.527	-41.9181
				289.075	-44.0201
				286.468	-41.2178
				256.614	-35.5326
				207.369	-29.707
				149.905	-25.6368
				92.5593	-23.4368
				38.213	-21.8255
				-14.0166	-19.4386
				-65.3439	-15.8828
				-115.194	-11.7174
				-160.527	-7.56439
				-195.204	-3.53031
				-209.964	0.152777
				-195.295	2.26345
				-147.068	1.21971
				-70.7567	-3.18766
				19.3624	-9.18912
				105.203	-14.3377
				170.302	-16.9084
				203.338	-16.2648
				200.344	-12.9272
				165.79	-8.3201
				110.812	-3.80738
				48.9122	0.0602085
				-8.13457	3.21928
				-52.7482	5.32371
				-82.3049	5.72096
				-98.2208	4.07712
				-104.238	0.790379
				-104.92	-2.91779
				-103.936	-5.42818
				-101.992	-5.91854
				-95.9916	-5.20347
				-80.554	-5.14041
				-51.0144	-7.28817
				-6.06488	-11.9859
				51.3188	-18.1232
				114.917	-23.4762
				177.329	-25.6229
				231.933	-23.3934
				274.469	-18.0445
				303.669	-12.3809
				320.151	-8.13608
				324.939	-4.86089
				319.117	-1.40204
				304.022	2.53806
				281.036	6.48543
				251.128	9.97469
				215.24	12.7212
				175.898	14.3129
				137.597	14.3204
				103.462	13.2082
				70.3082	12.9846
				27.8079	16.1647
				-35.8172	23.8291
				-126.12	34.8953
				-239.175	46.8939
				-363.985	57.1302
				-486.602	63.8249
				-592.511	66.749
				-667.575	66.5695
				-700.217	63.8588
				-686.45	59.1965
				-634.615	53.6615
				-563.727	48.4249
				-494.253	43.7127
				-437.557	38.3902
				-390.857	30.8561
				-339.978	20.3707
				-268.177	7.51407
				-166.417	-6.38377
				-39.3619	-20.1025
				96.1434	-32.7515
				218.562	-43.3293
				310.106	-50.5813
				362.088	-53.6286
				376.244	-52.8172
				361.835	-49.7019
				329.586	-45.8615
				286.889	-42.0369
				237.604	-38.5838
				183.841	-35.8738
				125.943	-33.7246
				61.6465	-31.1077
				-12.8051	-26.8892
				-99.3934	-20.4577
				-194.562	-11.7767
				-287.442	-1.65549
				-362.356	8.23026
				-404.514	16.2038
				-404.998	21.2382
				-362.097	22.761
				-279.767	20.528
				-167.218	15.0879
				-40.4927	8.24981
				78.5481	2.63543
				168.496	0.140826
				216.612	0.584627
				223.106	2.11372
				198.88	2.96584
				159.907	2.43437
				122.04	0.530754
				96.9538	-2.43825
				89.6554	-6.1913
				98.7456	-10.7263
				118.834	-16.0423
				143.342	-21.6439
				166.416	-26.6859
				183.514	-30.8129
				191.25	-34.6341
				187.786	-39.1019
				174.005	-44.4365
				153.746	-49.7915
				132.086	-54.092
				113.291	-57.0334
				99.9364	-58.8479
				92.9958	-59.2386
				92.5771	-57.2243
				98.6455	-52.1994
				110.961	-44.8707
				128.972	-37.2001
				152.126	-31.4295
				179.702	-28.6571
				210.394	-27.9009
				242.59	-26.5872
				274.919	-22.2381
				306.302	-14.0466
				335.643	-3.39254
				361.685	6.80458
				382.686	13.5964
				396.035	15.6079
				398.8	13.7703
				389.088	10.7105
				367.2	9.13641
				335.859	10.3678
				299.303	14.037
				261.509	18.8147
				223.813	23.4256
				182.527	27.4668
				128.46	31.523
				51.1764	36.4043
				-52.5222	42.4677
				-173.011	49.6243
				-291.904	57.3908
				-392.616	64.8998
				-468.423	71.3216
				-523.282	76.3209
				-567.529	79.9035
				-612.89	81.8256
				-668.712	81.4133
				-738.292	78.0724
				-814.954	71.7228
				-880.777	62.7122
				-911.826	51.6837
				-888.954	39.6219
				-807.456	27.7238
				-679.144	17.0694
				-525.892	8.50973
				-369.439	2.79976
				-224.218	0.416282
				-95.1588	0.852488
				22.4547	2.15952
				140.507	1.58756
				270.475	-3.02448
				414.223	-12.2716
				559.329	-24.9461
				681.767	-38.0752
				755.254	-47.4868
				763.105	-49.444
				706.089	-42.577
				602.139	-28.6751
				478.784	-11.8267
				363.171	3.58213
				274.977	14.7134
				224.099	20.5713
				212.202	20.9296
				236.426	15.4066
				292.223	3.64491
				372.011	-13.5436
				460.573	-33.2602
				533.343	-51.1497
				562.444	-62.984
				528.16	-65.7467
				428.361	-58.5379
				279.566	-43.5075
				108.525	-25.3425
				-60.8742	-9.14348
				-217.103	1.72098
				-361.294	6.84243
				-500.066	8.47514
				-636.988	9.58745
				-767.147	11.8346
				-876.084	14.957
				-943.561	17.4524
				-951.688	17.7151
				-893.254	14.8648
				-775.03	8.95358
				-615.488	1.01321
				-440.247	-6.9262
				-276.57	-12.4888
				-146.483	-14.1311
				-61.7597	-11.6689
				-24.3976	-5.89947
				-30.3866	2.0107
				-72.6749	11.181
				-142.198	21.3616
				-228.207	32.5799
				-319.527	44.8005
				-405.596	57.8699
				-475.46	70.9768
				-517.059	82.0964
				-519.568	88.6522
				-477.38	88.8683
				-392.572	82.4362
				-274.341	70.4267
				-135.883	54.888
				8.93688	38.1929
				147.142	22.4553
				267.448	9.2296
				362.065	-0.676399
				428.712	-7.21529
				470.624	-10.9513
				493.875	-13.0731
				504.173	-15.2342
				505.717	-18.7087
				502.52	-23.7817
				500.419	-30.212
				507.074	-37.8649
				528.961	-46.4784
				567.949	-55.0446
				619.64	-62.0529
				671.726	-66.3815
				702.424	-67.4637
				684.954	-64.8721
				601.904	-58.6197
				461.355	-50.046
				298.831	-41.7666
				158.342	-36.2013
				65.6725	-34.0396
				15.8504	-34.1099
				-16.2044	-34.5597
				-54.1948	-33.967
				-107.287	-31.6403
				-171.598	-27.6601
				-238.142	-22.993
				-297.479	-19.2574
				-339.24	-17.7929
				-351.22	-18.717
				-322.928	-21.0209
				-253.046	-23.2243
				-154.375	-23.6835
				-50.6996	-21.1342
				33.3106	-15.7013
				82.8009	-9.20034
				97.1679	-4.19734
				86.6475	-2.35256
				65.5449	-3.06817
				46.8911	-4.01676
				39.5702	-3.46771
				46.5221	-1.7433
				63.7914	-0.427841
				82.1304	-0.832974
				91.9147	-3.19442
				89.1493	-6.80383
				78.7775	-10.7304
				73.6356	-14.6052
				90.7144	-19.0537
				146.334	-25.5611
				249.665	-35.7017
				394.849	-49.9651
				556.038	-66.8532
				691.523	-83.0186
				758.542	-94.5015
				731.814	-98.2848
				614.093	-93.3648
				432.046	-80.7772
				221.731	-62.5727
				14.1685	-40.9409
				-171.821	-18.1418
				-327.843	3.62296
				-447.849	22.483
				-521.941	36.8787
				-539.628	45.8943
				-499.584	50.0244
				-416.618	51.2566
				-320.37	52.1204
				-245.774	54.6362
				-220.423	59.9192
				-255.711	68.1225
				-344.641	78.1872
				-466.011	87.829
				-593.834	94.5552
				-707.647	97.3019
				-798.1	97.103
				-865.987	95.9098
				-916.47	94.8849
				-951.124	93.9361
				-961.465	92.2217
				-929.158	88.5848
				-835.454	81.9179
				-674.509	71.9044
				-459.752	59.5135
				-217.812	46.3001
				23.0879	33.4118
				239.887	21.6144
				415.151	11.8232
				536.687	5.15623
				598.656	2.42325
				602.302	3.45303
				555.665	6.98274
				473.318	11.4524
				375.657	15.6527
				286.511	18.5403
				229.054	19.0845
				220.571	16.3097
				267.443	9.1543
				362.434	-3.00868
				485.233	-19.1037
				606.008	-36.122
				692.517	-50.6812
				721.141	-60.7679
				687.037	-66.0581
				605.241	-67.0547
				501.305	-64.2803
				398.3	-58.2641
				307.808	-50.0938
				229.243	-41.6001
				156.177	-34.5975
				83.3656	-29.8543
				10.0371	-26.7033
				-60.4523	-23.4513
				-123.336	-18.2843
				-175.638	-10.1558
				-217.465	0.851656
				-251.078	13.7057
				-279.071	26.707
				-302.753	37.9702
				-321.834	46.3174
				-335.931	51.6465
				-345.994	54.2621
				-352.385	54.196
				-350.592	51.0547
				-330.521	43.9624
				-282.091	31.908
				-203.671	14.8441
				-108.265	-5.4709
				-22.8498	-25.6536
				20.9716	-41.4767
				1.36007	-48.9716
				-81.0701	-46.0131
				-200.499	-33.7219
				-318.268	-16.3071
				-402.142	0.704869
				-436.622	12.6752
				-420.345	17.5821
				-359.474	16.4618
				-263.837	12.3593
				-145.515	8.77238
				-18.5127	8.24624
				101.35	11.3593
				198.999	17.0411
				265.394	24.1003
				300.543	32.0295
				311.469	40.3096
				308.108	47.693
				300.188	52.7956
				295.46	55.2301
				298.326	55.5345
				308.473	53.6737
				320.729	48.0471
				327.307	36.6866
				321.615	19.4507
				301.622	-1.07037
				270.7	-20.5379
				234.701	-35.1562
				197.716	-43.8041
				160.489	-48.1641
				121.327	-50.7588
				77.5359	-53.0908
				27.3804	-55.7754
				-27.7082	-59.4714
				-82.5795	-64.5137
				-130.362	-70.0856
				-165.498	-74.732
				-185.527	-77.4999
				-190.629	-78.1931
				-182.233	-77.0264
				-162.702	-74.4048
				-135.871	-70.6291
				-106.708	-65.6396
				-80.1565	-59.3855
				-60.3473	-52.595
				-50.2613	-46.6864
				-51.1147	-42.2977
				-61.8392	-38.3579
				-79.9089	-33.4059
				-102.899	-27.442
				-128.634	-21.884
				-154.135	-18.0022
				-175.613	-15.6567
				-189.414	-13.3888
				-192.51	-9.82174
				-183.358	-5.07664
				-163.97	-0.687224
				-140.949	1.76888
				-123.163	1.80646
				-117.537	0.0883561
				-126.294	-2.21587
				-146.868	-3.88546
				-173.653	-3.77665
				-200.007	-1.16371
				-218.949	3.83438
				-222.648	10.2462
				-203.065	16.699
				-154.791	22.0761
				-77.7172	25.8085
				22.8791	27.4696
				137.89	26.5688
				254.978	23.2638
				358.783	18.8235
				434.941	14.8959
				477.54	12.5088
				492.153	11.7432
				490.177	11.9656
				480.327	12.1417
				465.112	11.0532
				443.47	7.57442
				414.709	1.3037
				379.34	-6.62149
				337.539	-13.5795
				288.465	-16.8556
				231.022	-15.2784
				164.125	-9.58893
				86.1648	-1.38845
				-3.95316	7.94977
				-103.508	17.5567
				-203.305	26.8129
				-288.609	35.0178
				-343.889	41.2651
				-358.749	44.4906
				-331.125	43.7921
				-266.698	39.2759
				-177.202	32.7767
				-78.8545	27.3538
				10.8262	25.6345
				77.8739	28.1904
				115.668	33.1305
				126.328	37.3236
				120.486	38.5444
				115.123	37.0165
				128.478	34.8702
				173.213	33.6576
				250.832	32.2926
				350.023	27.8096
				449.935	18.7431
				527.17	8.02122
				564.009	2.07452
				554.331	6.20699
				503.241	19.8018
				421.035	34.9131
				317.035	39.5222
				196.676	24.4702
				61.9898	-10.1798
				-84.8941	-54.2415
				-237.841	-92.0668
				-386.519	-109.361
				-519.716	-99.2448
				-628.219	-64.8861
				-705.446	-16.663
				-747.255	34.3831
				-752.464	81.6623
				-723.855	123.303
				-668.506	158.916
				-597.672	186.839
				-526.252	204.035
				-469.97	207.47
				-439.963	195.262
				-437.912	167.418
				-455.191	126.539
				-477.055	77.6676
				-488.749	26.3084
				-479.372	-24.0897
				-443.451	-72.6336
				-382.057	-119.112
				-302.356	-161.924
				-213.813	-197.574
				-123.644	-221.765
				-35.4812	-231.184
				49.0523	-225.063
				128.443	-206.228
				200.106	-181.156
				259.895	-158.291
				302.553	-145.214
				323.487	-145.706
				321.252	-157.777
				299.232	-174.427
				265.251	-186.632
				229.21	-185.969
				200.266	-167.246
				185.09	-132.141
				187.037	-89.5488
				205.182	-49.603
				234.066	-16.9626
				265.488	10.435
				291.226	38.359
				305.06	72.9535
				304.247	117.845
				289.929	171.036
				265.491	223.267
				234.115	261.348
				197.647	276.254
				157.449	268.785
				116.362	247.51
				80.0515	223.195
				55.85	205.256
				49.0007	200.413
				58.6368	212.202
				76.3185	239.499
				87.9555	273.76
				78.0064	300.507
				35.4165	306.917
				-39.6327	287.522
				-131.859	244.556
				-213.643	186.98
				-254.215	127.539
				-230.915	75.4501
				-138.093	30.5247
				8.5121	-14.4115
				174.482	-65.8274
				318.106	-124.307
				405.813	-184.523
				423.116	-238.096
				376.431	-276.811
				287.015	-295.773
				180.955	-296.332
				79.4299	-285.699
				-7.00687	-272.008
				-77.8472	-259.418
				-136.605	-247.605
				-183.026	-234.934
				-208.289	-221.646
				-197.904	-209.959
				-142.492	-201.572
				-47.59	-195.55
				66.6902	-187.883
				174.605	-172.226
				254.411	-142.937
				293.85	-100.97
				291.352	-56.4667
				254.392	-22.2721
				196.18	-4.97321
				132.02	-2.29954
				76.7817	-5.46761
				42.8868	-2.42688
				36.5206	17.9057
				53.2822	59.0882
				78.3916	111.274
				93.502	154.378
				85.7421	171.321
				52.6796	158.979
				1.70992	127.609
				-53.6626	92.871
				-100.253	67.9787
				-132.855	59.244
				-156.955	65.8443
				-183.691	82.5844
				-221.963	102.468
				-273.577	118.235
				-333.359	124.91
				-393.099	122.646
				-446.157	115.514
				-488.809	106.074
				-517.99	92.2624
				-529.327	70.525
				-517.814	40.6316
				-480.383	6.51366
				-419.213	-26.2364
				-343.606	-52.664
				-268.354	-69.4946
				-209.061	-75.7625
				-175.237	-73.346
				-163.662	-66.873
				-158.227	-62.4416
				-138.34	-65.0042
				-89.4789	-75.7495
				-9.48825	-91.8352
				90.4646	-108.682
				189.626	-122.694
				264.846	-132.347
				298.463	-137.48
				284.042	-138.34
				227.421	-135.226
				142.636	-128.065
				46.2029	-116.013
				-46.7299	-98.1094
				-124.046	-74.6719
				-176.966	-47.3647
				-199.795	-18.0827
				-190.298	11.0917
				-151.037	36.9794
				-90.1065	55.8758
				-19.4805	65.949
				48.8273	68.2132
				106.512	64.3691
				150.488	55.2649
				182.219	42.3115
				206.292	28.0603
				228.912	14.1605
				256.404	0.458196
				293.63	-13.2021
				342.235	-25.3657
				399.065	-33.2655
				455.557	-33.909
				499.46	-25.0443
				519.737	-6.40699
				512.323	19.0665
				481.496	45.8123
				434.693	68.5838
				375.948	85.4043
				304.846	97.8521
				220.943	108.93
				127.497	120.634
				30.5177	132.911
				-64.8141	144.405
				-155.331	153.549
				-236.864	158.806
				-301.195	159.318
				-337.141	156.316
				-334.272	153.057
				-286.163	152.665
				-193.81	155.99
				-70.2201	161.171
				57.8224	164.899
				156.46	164.233
				198.93	157.461
				177.744	143.661
				105.94	122.815
				8.48084	96.8372
				-88.4708	69.1449
				-165.051	42.5265
				-210.556	18.0137
				-222.671	-4.57845
				-205.795	-25.8208
				-169.662	-45.7709
				-127.172	-63.343
				-91.0492	-76.9478
				-70.3742	-85.668
				-68.231	-89.6718
				-81.8018	-89.8587
				-104.995	-87.3421
				-131.188	-83.5983
				-154.42	-80.8609
				-170.339	-81.2783
				-177.535	-85.5209
[truncated: 842 more rows]
